# Supplementary material for: Mechanisms of multidrug resistance caused by an Ipi1 mutation in the fungal pathogen Candida glabrata
Source: Springer Nature journal article supplement (doi:10.1038/s41467-025-56269-z), 2025-01-25
Supplement: MOESM3 [file 41467_2025_56269_MOESM3_ESM.xlsx]

## Sheet: Filtered_pileup
No.	varFilter FLAG	Reference	Position	Ref Base	Cons/Alt Base	Cons Qual	SNP Qual	Map Qual	# reads (depth)	Variants	Others	Type	Gene Name / Location	Protein Group (CDS)	Protein ID (CDS)	Strand	Note1	Note2
1	d	Cagl0B	500636	*	+C/+C	40	0	0	1	+C[1];*[0]	Other[0]	pseudogene	CAGL0B05093g	.	.	+	some similarities with uniprot|P47179 Saccharomyces cerevisiae YJR151c no start frameshiftpseudogene	.
2	d	Cagl0F	2526	t	G	3	27	37	2	Ref[0];A[0];T[0];G[2];C[0]	.	pseudogene	CAGL0F00110g	.	.	-	no similaritypseudogene	.
3	d	Cagl0H	5188	t	G	3	14	24	2	Ref[0];A[0];T[0];G[2];C[0]	.	pseudogene	CAGL0H00132g	.	.	-	some similarities with uniprot|P08640 Saccharomyces cerevisiae YIR019c STA1 no start frameshiftpseudogene	.
4	d	Cagl0H	5189	a	G	3	14	24	2	Ref[0];A[0];T[0];G[2];C[0]	.	pseudogene	CAGL0H00132g	.	.	-	some similarities with uniprot|P08640 Saccharomyces cerevisiae YIR019c STA1 no start frameshiftpseudogene	.
5	d	Cagl0I	6045	t	A	0	0	37	1	Ref[0];A[1];T[0];G[0];C[0]	.	pseudogene	CAGL0I00110g	.	.	-	some similarities with uniprot|P38894 Saccharomyces cerevisiae YHR211w FLO5 no start frameshiftpseudogene	.
6	d	Cagl0I	6046	c	Y	0	4	37	1	Ref[0];A[0];T[1];G[0];C[0]	.	pseudogene	CAGL0I00110g	.	.	-	some similarities with uniprot|P38894 Saccharomyces cerevisiae YHR211w FLO5 no start frameshiftpseudogene	.
7	d	Cagl0J	168173	a	G	3	12	23	2	Ref[0];A[0];T[0];G[2];C[0]	.	CDS	CAGL0J01774g	GL3C3673	CAR58040.1	-	no similarity	product=CAGL0J01774p;db_xref=UniProtKB/TrEMBL:B4UN24;
8	d	Cagl0J	168221	a	G	3	7	23	2	Ref[0];A[0];T[0];G[2];C[0]	.	CDS	CAGL0J01774g	GL3C3673	CAR58040.1	-	no similarity	product=CAGL0J01774p;db_xref=UniProtKB/TrEMBL:B4UN24;
9	d	Cagl0J	1190727	t	C	0	3	37	2	Ref[0];A[0];T[0];G[0];C[2]	.	pseudogene	CAGL0J11990g	.	.	+	some similarities with uniprot|P38739 Saccharomyces cerevisiae YHL028w WSC4 no start frameshiftpseudogene	.
10	d	Cagl0K	742451	t	C	3	21	32	2	Ref[0];A[0];T[0];G[0];C[2]	.	CDS	CAGL0K07502g	.	CAG61510.1	+	no similarity possibly noncoding	product=CAGL0K07502p;db_xref=UniProtKB/TrEMBL:Q6FMJ7;
11	d	Cagl0K	742513	g	C	3	14	25	2	Ref[0];A[0];T[0];G[0];C[2]	.	CDS	CAGL0K07502g	.	CAG61510.1	+	no similarity possibly noncoding	product=CAGL0K07502p;db_xref=UniProtKB/TrEMBL:Q6FMJ7;
12	d	Cagl0K	742519	t	C	3	15	25	2	Ref[0];A[0];T[0];G[0];C[2]	.	CDS	CAGL0K07502g	.	CAG61510.1	+	no similarity possibly noncoding	product=CAGL0K07502p;db_xref=UniProtKB/TrEMBL:Q6FMJ7;
13	d	Cagl0K	742527	t	C	3	15	25	2	Ref[0];A[0];T[0];G[0];C[2]	.	CDS	CAGL0K07502g	.	CAG61510.1	+	no similarity possibly noncoding	product=CAGL0K07502p;db_xref=UniProtKB/TrEMBL:Q6FMJ7;
14	G	Cagl0C	100102	g	R	35	35	32	57	Ref[47];A[10];T[0];G[47];C[0]	-A[20]	.	LEFT[ CDS:CAGL0C00968g:96914-100018 ];RIGHT[ gap::102374-102473 ]	.	.	.	.	.
15	G	Cagl0D	4598	a	M	214	214	37	43	Ref[25];A[25];T[0];G[0];C[18]	.	pseudogene	CAGL0D00110g	.	.	-	some similarities with uniprot|P40442 Saccharomyces cerevisiae YIL169c frameshiftpseudogene	.
16	g	Cagl0A	1470	*	*/+T	815	815	36	1459	*[1453];+T[5]	Other[1]	.	LEFT[ - ];RIGHT[ CDS:CAGL0A00165g:18037-18876 ]	.	.	.	.	.
17	g	Cagl0A	1480	*	*/+TT	10822	10822	37	1419	*[1418];+TT[1]	Other[0]	.	LEFT[ - ];RIGHT[ CDS:CAGL0A00165g:18037-18876 ]	.	.	.	.	.
18	g	Cagl0A	455808	*	*/-g	37	37	37	648	*[645];-g[2]	Other[1]	.	LEFT[ CDS:CAGL0A04587g:454151-455479 ];RIGHT[ CDS:CAGL0A04631g:456156-457241 ]	.	.	.	.	.
19	g	Cagl0A	424680	*	*/-g	595	595	36	133	*[128];-g[4]	Other[1]	.	LEFT[ CDS:CAGL0A04257g:422355-424289 ];RIGHT[ CDS:CAGL0A04279g:425058-426212 ]	.	.	.	.	.
20	G	Cagl0A	1480	g	K	206	206	37	1419	Ref[917];A[0];T[502];G[917];C[0]	+TT[1]	.	LEFT[ - ];RIGHT[ CDS:CAGL0A00165g:18037-18876 ]	.	.	.	.	.
21	G	Cagl0C	100103	a	R	165	165	30	57	Ref[19];A[19];T[0];G[18];C[0]	Gap[20]	.	LEFT[ CDS:CAGL0C00968g:96914-100018 ];RIGHT[ gap::102374-102473 ]	.	.	.	.	.
22	G	Cagl0D	4600	c	Y	148	148	37	37	Ref[25];A[0];T[12];G[0];C[25]	.	pseudogene	CAGL0D00110g	.	.	-	some similarities with uniprot|P40442 Saccharomyces cerevisiae YIL169c frameshiftpseudogene	.
23	g	Cagl0B	2458	*	-c/-c	613	2090	35	193	-c[1];*[192]	Other[0]	pseudogene	CAGL0B00110g	.	.	-	some similarities with uniprot|P08640 Saccharomyces cerevisiae YIR019c STA1 no start frameshiftpseudogene	.
24	G	Cagl0D	4625	a	W	36	36	37	21	Ref[16];A[16];T[5];G[0];C[0]	-T[16]	pseudogene	CAGL0D00110g	.	.	-	some similarities with uniprot|P40442 Saccharomyces cerevisiae YIL169c frameshiftpseudogene	.
25	g	Cagl0B	3394	*	-g/-g	137	1133	37	33	-g[19];*[14]	Other[0]	pseudogene	CAGL0B00110g	.	.	-	some similarities with uniprot|P08640 Saccharomyces cerevisiae YIR019c STA1 no start frameshiftpseudogene	.
26	G	Cagl0A	10412	t	W	183	183	36	1812	Ref[1218];A[546];T[1218];G[0];C[0]	Gap[48]	.	LEFT[ - ];RIGHT[ CDS:CAGL0A00165g:18037-18876 ]	.	.	.	.	.
27	G	Cagl0A	10413	t	K	22	22	36	1681	Ref[1305];A[3];T[1305];G[328];C[0]	Gap[45]	.	LEFT[ - ];RIGHT[ CDS:CAGL0A00165g:18037-18876 ]	.	.	.	.	.
28	G	Cagl0A	170406	t	K	61	61	36	34	Ref[9];A[0];T[9];G[21];C[0]	Gap[4]	.	LEFT[ CDS:CAGL0A01716g:169567-170202 ];RIGHT[ CDS:CAGL0A01738g:170940-172349 ]	.	.	.	.	.
29	G	Cagl0D	4626	t	A	36	225	37	30	Ref[0];A[14];T[0];G[0];C[0]	Gap[16]	pseudogene	CAGL0D00110g	.	.	-	some similarities with uniprot|P40442 Saccharomyces cerevisiae YIL169c frameshiftpseudogene	.
30	G	Cagl0A	424680	t	K	23	23	37	133	Ref[85];A[1];T[85];G[42];C[1]	Gap[4];-GG[1];-G[4]	.	LEFT[ CDS:CAGL0A04257g:422355-424289 ];RIGHT[ CDS:CAGL0A04279g:425058-426212 ]	.	.	.	.	.
31	G	Cagl0B	1855	a	R	65	65	36	630	Ref[495];A[495];T[0];G[135];C[0]	.	pseudogene	CAGL0B00110g	.	.	-	some similarities with uniprot|P08640 Saccharomyces cerevisiae YIR019c STA1 no start frameshiftpseudogene	.
32	G	Cagl0B	2460	t	A	72	225	35	184	Ref[0];A[26];T[0];G[0];C[1]	Gap[157]	pseudogene	CAGL0B00110g	.	.	-	some similarities with uniprot|P08640 Saccharomyces cerevisiae YIR019c STA1 no start frameshiftpseudogene	.
33	g	Cagl0B	2479	*	-c/-c	269	1843	33	77	-c[24];*[53]	Other[0]	pseudogene	CAGL0B00110g	.	.	-	some similarities with uniprot|P08640 Saccharomyces cerevisiae YIR019c STA1 no start frameshiftpseudogene	.
34	G	Cagl0B	2482	c	S	168	168	34	44	Ref[24];A[0];T[0];G[20];C[24]	.	pseudogene	CAGL0B00110g	.	.	-	some similarities with uniprot|P08640 Saccharomyces cerevisiae YIR019c STA1 no start frameshiftpseudogene	.
35	G	Cagl0B	2483	g	K	35	35	37	32	Ref[24];A[0];T[8];G[24];C[0]	.	pseudogene	CAGL0B00110g	.	.	-	some similarities with uniprot|P08640 Saccharomyces cerevisiae YIR019c STA1 no start frameshiftpseudogene	.
36	g	Cagl0B	2484	*	+C/+C	110	458	37	24	+C[10];*[14]	Other[0]	pseudogene	CAGL0B00110g	.	.	-	some similarities with uniprot|P08640 Saccharomyces cerevisiae YIR019c STA1 no start frameshiftpseudogene	.
37	G	Cagl0B	2566	a	C	33	207	37	644	Ref[113];A[113];T[0];G[1];C[530]	.	pseudogene	CAGL0B00110g	.	.	-	some similarities with uniprot|P08640 Saccharomyces cerevisiae YIR019c STA1 no start frameshiftpseudogene	.
38	G	Cagl0B	2569	g	T	12	100	37	652	Ref[2];A[0];T[7];G[2];C[0]	Gap[643]	pseudogene	CAGL0B00110g	.	.	-	some similarities with uniprot|P08640 Saccharomyces cerevisiae YIR019c STA1 no start frameshiftpseudogene	.
39	g	Cagl0B	2570	*	-c/*	1117	4679	37	735	-c[1];*[734]	Other[0]	pseudogene	CAGL0B00110g	.	.	-	some similarities with uniprot|P08640 Saccharomyces cerevisiae YIR019c STA1 no start frameshiftpseudogene	.
40	G	Cagl0B	2658	c	M	141	141	37	290	Ref[32];A[19];T[0];G[0];C[32]	Gap[239]	pseudogene	CAGL0B00110g	.	.	-	some similarities with uniprot|P08640 Saccharomyces cerevisiae YIR019c STA1 no start frameshiftpseudogene	.
41	g	Cagl0B	2673	*	-t/-t	629	4026	37	197	-t[86];*[111]	Other[0]	pseudogene	CAGL0B00110g	.	.	-	some similarities with uniprot|P08640 Saccharomyces cerevisiae YIR019c STA1 no start frameshiftpseudogene	.
42	G	Cagl0B	2674	t	G	105	225	37	123	Ref[0];A[0];T[0];G[37];C[0]	Gap[86]	pseudogene	CAGL0B00110g	.	.	-	some similarities with uniprot|P08640 Saccharomyces cerevisiae YIR019c STA1 no start frameshiftpseudogene	.
43	G	Cagl0B	3394	t	W	158	158	37	33	Ref[19];A[14];T[19];G[0];C[0]	-G[19]	pseudogene	CAGL0B00110g	.	.	-	some similarities with uniprot|P08640 Saccharomyces cerevisiae YIR019c STA1 no start frameshiftpseudogene	.
44	G	Cagl0B	3395	g	T	54	225	37	38	Ref[0];A[0];T[19];G[0];C[0]	Gap[19]	pseudogene	CAGL0B00110g	.	.	-	some similarities with uniprot|P08640 Saccharomyces cerevisiae YIR019c STA1 no start frameshiftpseudogene	.
45	g	Cagl0B	122982	*	*/-ga	934	934	37	511	*[509];-ga[2]	Other[0]	.	LEFT[ CDS:CAGL0B01353g:120462-122519 ];RIGHT[ CDS:CAGL0B01375g:123330-126662 ]	.	.	.	.	.
46	g	Cagl0B	3672	*	-t/-t	707	7696	36	223	-t[149];*[71]	Other[3]	pseudogene	CAGL0B00110g	.	.	-	some similarities with uniprot|P08640 Saccharomyces cerevisiae YIR019c STA1 no start frameshiftpseudogene	.
47	G	Cagl0B	3573	a	M	132	132	36	817	Ref[65];A[65];T[0];G[0];C[26]	Gap[726]	pseudogene	CAGL0B00110g	.	.	-	some similarities with uniprot|P08640 Saccharomyces cerevisiae YIR019c STA1 no start frameshiftpseudogene	.
48	g	Cagl0B	3673	*	-a/-a	610	2761	36	224	-a[1];*[223]	Other[0]	pseudogene	CAGL0B00110g	.	.	-	some similarities with uniprot|P08640 Saccharomyces cerevisiae YIR019c STA1 no start frameshiftpseudogene	.
49	G	Cagl0B	3673	t	M	225	225	36	224	Ref[4];A[33];T[4];G[0];C[38]	-A[1];Gap[149]	pseudogene	CAGL0B00110g	.	.	-	some similarities with uniprot|P08640 Saccharomyces cerevisiae YIR019c STA1 no start frameshiftpseudogene	.
50	g	Cagl0B	434537	*	*/-tc	807	807	36	493	*[491];-tc[2]	Other[0]	.	LEFT[ CDS:CAGL0B04433g:432245-434227 ];RIGHT[ CDS:CAGL0B04455g:435437-437254 ]	.	.	.	.	.
51	g	Cagl0C	107964	*	*/+C	1850	1850	37	1953	*[1952];+C[1]	Other[0]	.	LEFT[ pseudogene:CAGL0C01067g:104419-107905 ];RIGHT[ CDS:CAGL0C01133g:114805-117915 ]	.	.	.	.	.
52	G	Cagl0B	3688	c	K	186	225	34	211	Ref[0];A[0];T[26];G[24];C[0]	Gap[161]	pseudogene	CAGL0B00110g	.	.	-	some similarities with uniprot|P08640 Saccharomyces cerevisiae YIR019c STA1 no start frameshiftpseudogene	.
53	G	Cagl0B	3919	a	R	204	204	37	895	Ref[41];A[41];T[0];G[22];C[0]	Gap[832]	pseudogene	CAGL0B00110g	.	.	-	some similarities with uniprot|P08640 Saccharomyces cerevisiae YIR019c STA1 no start frameshiftpseudogene	.
54	G	Cagl0D	4637	t	G	42	225	33	93	Ref[0];A[0];T[0];G[15];C[0]	Gap[78]	pseudogene	CAGL0D00110g	.	.	-	some similarities with uniprot|P40442 Saccharomyces cerevisiae YIL169c frameshiftpseudogene	.
55	g	Cagl0B	434538	*	*/-c	414	414	36	502	*[492];-c[10]	Other[0]	.	LEFT[ CDS:CAGL0B04433g:432245-434227 ];RIGHT[ CDS:CAGL0B04455g:435437-437254 ]	.	.	.	.	.
56	G	Cagl0B	4011	g	C	105	225	36	816	Ref[0];A[0];T[0];G[0];C[36]	Gap[780]	pseudogene	CAGL0B00110g	.	.	-	some similarities with uniprot|P08640 Saccharomyces cerevisiae YIR019c STA1 no start frameshiftpseudogene	.
57	G	Cagl0D	651495	t	C	225	225	37	1682	Ref[3];A[0];T[3];G[2];C[132]	Gap[1545]	pseudogene	CAGL0D06732g	.	.	+	some similarities with uniprot|P47179 Saccharomyces cerevisiae YJR151c no start frameshiftpseudogene	.
58	g	Cagl0B	434515	*	*/-g	542	542	36	464	*[458];-g[3]	Other[3]	.	LEFT[ CDS:CAGL0B04433g:432245-434227 ];RIGHT[ CDS:CAGL0B04455g:435437-437254 ]	.	.	.	.	.
59	g	Cagl0B	480475	*	*/+TA	7533	7533	37	695	*[694];+TA[1]	Other[0]	.	LEFT[ CDS:CAGL0B04917g:477939-479174 ];RIGHT[ CDS:CAGL0B04939g:480761-482563 ]	.	.	.	.	.
60	G	Cagl0B	499276	c	Y	183	183	37	120	Ref[86];A[0];T[34];G[0];C[86]	-G[86]	pseudogene	CAGL0B05093g	.	.	+	some similarities with uniprot|P47179 Saccharomyces cerevisiae YJR151c no start frameshiftpseudogene	.
61	g	Cagl0B	480483	*	+GC/*	16812	18114	37	692	+GC[1];*[691]	Other[0]	.	LEFT[ CDS:CAGL0B04917g:477939-479174 ];RIGHT[ CDS:CAGL0B04939g:480761-482563 ]	.	.	.	.	.
62	g	Cagl0B	480489	*	+GA/*	14952	18064	37	683	+GA[2];*[681]	Other[0]	.	LEFT[ CDS:CAGL0B04917g:477939-479174 ];RIGHT[ CDS:CAGL0B04939g:480761-482563 ]	.	.	.	.	.
63	g	Cagl0B	480493	*	+GG/*	14289	18035	37	680	+GG[1];*[679]	Other[0]	.	LEFT[ CDS:CAGL0B04917g:477939-479174 ];RIGHT[ CDS:CAGL0B04939g:480761-482563 ]	.	.	.	.	.
64	G	Cagl0B	501344	c	A	74	225	37	630	Ref[0];A[34];T[0];G[1];C[0]	Gap[595]	pseudogene	CAGL0B05093g	.	.	+	some similarities with uniprot|P47179 Saccharomyces cerevisiae YJR151c no start frameshiftpseudogene	.
65	g	Cagl0B	480499	*	+GA/*	14132	17815	37	705	+GA[1];*[704]	Other[0]	.	LEFT[ CDS:CAGL0B04917g:477939-479174 ];RIGHT[ CDS:CAGL0B04939g:480761-482563 ]	.	.	.	.	.
66	g	Cagl0B	480502	*	+TA/*	13454	17896	37	704	+TA[1];*[703]	Other[0]	.	LEFT[ CDS:CAGL0B04917g:477939-479174 ];RIGHT[ CDS:CAGL0B04939g:480761-482563 ]	.	.	.	.	.
67	g	Cagl0B	499019	*	-t/-t	428	5249	36	130	-t[102];*[28]	Other[0]	pseudogene	CAGL0B05093g	.	.	+	some similarities with uniprot|P47179 Saccharomyces cerevisiae YJR151c no start frameshiftpseudogene	.
68	g	Cagl0B	499263	*	-a/-a	131	1078	37	31	-a[22];*[9]	Other[0]	pseudogene	CAGL0B05093g	.	.	+	some similarities with uniprot|P47179 Saccharomyces cerevisiae YJR151c no start frameshiftpseudogene	.
69	G	Cagl0B	502081	g	R	228	228	36	186	Ref[127];A[59];T[0];G[127];C[0]	.	.	LEFT[ pseudogene:CAGL0B05093g:498198-501364 ];RIGHT[ - ]	.	.	.	.	.
70	g	Cagl0B	480503	*	+GC/*	12615	17906	37	704	+GC[1];*[703]	Other[0]	.	LEFT[ CDS:CAGL0B04917g:477939-479174 ];RIGHT[ CDS:CAGL0B04939g:480761-482563 ]	.	.	.	.	.
71	G	Cagl0B	498889	a	Y	225	225	35	844	Ref[1];A[1];T[28];G[0];C[45]	Gap[770]	pseudogene	CAGL0B05093g	.	.	+	some similarities with uniprot|P47179 Saccharomyces cerevisiae YJR151c no start frameshiftpseudogene	.
72	G	Cagl0B	498890	g	C	225	225	37	853	Ref[0];A[0];T[37];G[0];C[816]	.	pseudogene	CAGL0B05093g	.	.	+	some similarities with uniprot|P47179 Saccharomyces cerevisiae YJR151c no start frameshiftpseudogene	.
73	G	Cagl0B	499015	c	Y	212	212	36	149	Ref[102];A[0];T[47];G[0];C[102]	.	pseudogene	CAGL0B05093g	.	.	+	some similarities with uniprot|P47179 Saccharomyces cerevisiae YJR151c no start frameshiftpseudogene	.
74	G	Cagl0B	499018	t	W	94	94	36	134	Ref[102];A[32];T[102];G[0];C[0]	.	pseudogene	CAGL0B05093g	.	.	+	some similarities with uniprot|P47179 Saccharomyces cerevisiae YJR151c no start frameshiftpseudogene	.
75	G	Cagl0B	499263	g	K	69	69	37	31	Ref[22];A[0];T[9];G[22];C[0]	-A[22]	pseudogene	CAGL0B05093g	.	.	+	some similarities with uniprot|P47179 Saccharomyces cerevisiae YJR151c no start frameshiftpseudogene	.
76	G	Cagl0B	499264	a	G	57	225	37	42	Ref[0];A[0];T[0];G[20];C[0]	Gap[22]	pseudogene	CAGL0B05093g	.	.	+	some similarities with uniprot|P47179 Saccharomyces cerevisiae YJR151c no start frameshiftpseudogene	.
77	g	Cagl0C	80895	*	*/-a	32	32	36	180	*[176];-a[4]	Other[0]	.	LEFT[ CDS:CAGL0C00759g:78078-80435 ];RIGHT[ CDS:CAGL0C00781g:81411-82193 ]	.	.	.	.	.
78	g	Cagl0C	7154	*	*/-aa	2216	2216	34	718	*[711];-aa[7]	Other[0]	.	LEFT[ CDS:CAGL0C00110g:2137-4284 ];RIGHT[ gap::11452-11551 ]	.	.	.	.	.
79	G	Cagl0C	90693	a	C	225	225	33	696	Ref[71];A[71];T[44];G[0];C[581]	.	.	LEFT[ CDS:CAGL0C00847g:86130-88502 ];RIGHT[ gap::91153-91252 ]	.	.	.	.	.
80	G	Cagl0C	93984	c	S	228	228	37	904	Ref[585];A[6];T[0];G[312];C[585]	Gap[1]	.	LEFT[ gap::91153-91252 ];RIGHT[ CDS:CAGL0C00968g:96914-100018 ]	.	.	.	.	.
81	G	Cagl0C	96282	c	Y	228	228	37	953	Ref[533];A[0];T[420];G[0];C[533]	.	.	LEFT[ gap::91153-91252 ];RIGHT[ CDS:CAGL0C00968g:96914-100018 ]	.	.	.	.	.
82	g	Cagl0C	96290	*	*/+T	1136	1136	37	923	*[922];+T[1]	Other[0]	.	LEFT[ gap::91153-91252 ];RIGHT[ CDS:CAGL0C00968g:96914-100018 ]	.	.	.	.	.
83	g	Cagl0C	100102	*	-a/-a	209	1359	31	57	-a[20];*[37]	Other[0]	.	LEFT[ CDS:CAGL0C00968g:96914-100018 ];RIGHT[ gap::102374-102473 ]	.	.	.	.	.
84	g	Cagl0C	100206	*	-g/-g	1754	6273	37	572	-g[1];*[571]	Other[0]	.	LEFT[ CDS:CAGL0C00968g:96914-100018 ];RIGHT[ gap::102374-102473 ]	.	.	.	.	.
85	G	Cagl0C	96293	g	K	228	228	37	905	Ref[532];A[1];T[372];G[532];C[0]	.	.	LEFT[ gap::91153-91252 ];RIGHT[ CDS:CAGL0C00968g:96914-100018 ]	.	.	.	.	.
86	G	Cagl0C	100208	c	T	59	225	29	558	Ref[1];A[0];T[32];G[0];C[1]	Gap[525]	.	LEFT[ CDS:CAGL0C00968g:96914-100018 ];RIGHT[ gap::102374-102473 ]	.	.	.	.	.
87	G	Cagl0C	100761	c	Y	154	154	31	1104	Ref[754];A[5];T[345];G[0];C[754]	.	.	LEFT[ CDS:CAGL0C00968g:96914-100018 ];RIGHT[ gap::102374-102473 ]	.	.	.	.	.
88	G	Cagl0C	106089	c	T	225	225	32	824	Ref[26];A[0];T[798];G[0];C[26]	+T[1]	pseudogene	CAGL0C01067g	.	.	+	some similarities with uniprot|P08640 Saccharomyces cerevisiae YIR019c STA1 no start frameshiftpseudogene	.
89	G	Cagl0C	107957	g	R	5	5	37	2029	Ref[1666];A[363];T[0];G[1666];C[0]	.	.	LEFT[ pseudogene:CAGL0C01067g:104419-107905 ];RIGHT[ CDS:CAGL0C01133g:114805-117915 ]	.	.	.	.	.
90	G	Cagl0C	108106	c	S	94	94	37	184	Ref[141];A[0];T[0];G[43];C[141]	.	.	LEFT[ pseudogene:CAGL0C01067g:104419-107905 ];RIGHT[ CDS:CAGL0C01133g:114805-117915 ]	.	.	.	.	.
91	G	Cagl0C	108107	g	R	23	23	37	173	Ref[141];A[32];T[0];G[141];C[0]	.	.	LEFT[ pseudogene:CAGL0C01067g:104419-107905 ];RIGHT[ CDS:CAGL0C01133g:114805-117915 ]	.	.	.	.	.
92	G	Cagl0C	108134	g	R	228	228	37	88	Ref[34];A[54];T[0];G[34];C[0]	-T[34]	.	LEFT[ pseudogene:CAGL0C01067g:104419-107905 ];RIGHT[ CDS:CAGL0C01133g:114805-117915 ]	.	.	.	.	.
93	g	Cagl0C	108114	*	-t/-t	308	2919	37	110	-t[23];*[87]	Other[0]	.	LEFT[ pseudogene:CAGL0C01067g:104419-107905 ];RIGHT[ CDS:CAGL0C01133g:114805-117915 ]	.	.	.	.	.
94	G	Cagl0C	108130	a	G	48	225	37	17	Ref[0];A[0];T[0];G[17];C[0]	.	.	LEFT[ pseudogene:CAGL0C01067g:104419-107905 ];RIGHT[ CDS:CAGL0C01133g:114805-117915 ]	.	.	.	.	.
95	g	Cagl0C	108134	*	-t/-t	302	2219	37	88	-t[34];*[54]	Other[0]	.	LEFT[ pseudogene:CAGL0C01067g:104419-107905 ];RIGHT[ CDS:CAGL0C01133g:114805-117915 ]	.	.	.	.	.
96	g	Cagl0C	276202	*	*/-a	36	36	37	239	*[236];-a[3]	Other[0]	.	LEFT[ CDS:CAGL0C02717g:275325-276191 ];RIGHT[ CDS:CAGL0C02739g:276663-277250 ]	.	.	.	.	.
97	G	Cagl0C	108145	a	W	186	186	36	370	Ref[250];A[250];T[120];G[0];C[0]	-G[250]	.	LEFT[ pseudogene:CAGL0C01067g:104419-107905 ];RIGHT[ CDS:CAGL0C01133g:114805-117915 ]	.	.	.	.	.
98	G	Cagl0C	108146	g	A	225	225	35	403	Ref[0];A[153];T[0];G[0];C[0]	Gap[250]	.	LEFT[ pseudogene:CAGL0C01067g:104419-107905 ];RIGHT[ CDS:CAGL0C01133g:114805-117915 ]	.	.	.	.	.
99	G	Cagl0C	111825	a	R	21	21	37	1357	Ref[1085];A[1085];T[0];G[271];C[1]	.	.	LEFT[ pseudogene:CAGL0C01067g:104419-107905 ];RIGHT[ CDS:CAGL0C01133g:114805-117915 ]	.	.	.	.	.
100	G	Cagl0C	111841	c	Y	102	102	37	1418	Ref[1092];A[0];T[326];G[0];C[1092]	.	.	LEFT[ pseudogene:CAGL0C01067g:104419-107905 ];RIGHT[ CDS:CAGL0C01133g:114805-117915 ]	.	.	.	.	.
101	g	Cagl0C	552399	*	*/-aa	3700	3700	26	891	*[889];-aa[1]	Other[1]	.	LEFT[ CDS:CAGL0C05599g:538455-541559 ];RIGHT[ pseudogene:CAGL0C05643g:555325-557469 ]	.	.	.	.	.
102	g	Cagl0C	552417	*	*/-a	1465	1465	32	792	*[791];-a[1]	Other[0]	.	LEFT[ CDS:CAGL0C05599g:538455-541559 ];RIGHT[ pseudogene:CAGL0C05643g:555325-557469 ]	.	.	.	.	.
103	g	Cagl0C	552419	*	*/-a	1457	1457	32	801	*[800];-a[1]	Other[0]	.	LEFT[ CDS:CAGL0C05599g:538455-541559 ];RIGHT[ pseudogene:CAGL0C05643g:555325-557469 ]	.	.	.	.	.
104	g	Cagl0E	464057	*	*/+TAA	1769	1769	33	2321	*[2320];+TAA[1]	Other[0]	.	LEFT[ CDS:CAGL0E04818g:462438-463712 ];RIGHT[ CDS:CAGL0E04840g:464344-465546 ]	.	.	.	.	.
105	G	Cagl0D	421	a	W	13	13	36	1332	Ref[1079];A[1079];T[252];G[0];C[1]	.	.	LEFT[ - ];RIGHT[ pseudogene:CAGL0D00110g:3088-5439 ]	.	.	.	.	.
106	G	Cagl0D	3633	a	G	225	225	37	145	Ref[0];A[0];T[0];G[145];C[0]	.	pseudogene	CAGL0D00110g	.	.	-	some similarities with uniprot|P40442 Saccharomyces cerevisiae YIL169c frameshiftpseudogene	.
107	G	Cagl0D	3641	c	T	60	225	35	203	Ref[0];A[0];T[23];G[0];C[0]	Gap[180]	pseudogene	CAGL0D00110g	.	.	-	some similarities with uniprot|P40442 Saccharomyces cerevisiae YIL169c frameshiftpseudogene	.
108	g	Cagl0D	651060	*	-ca/-ca	76	35	27	897	-ca[1];*[896]	Other[0]	pseudogene	CAGL0D06732g	.	.	+	some similarities with uniprot|P47179 Saccharomyces cerevisiae YJR151c no start frameshiftpseudogene	.
109	g	Cagl0D	3942	*	-t/-t	1067	3734	36	343	-t[1];*[342]	Other[0]	pseudogene	CAGL0D00110g	.	.	-	some similarities with uniprot|P40442 Saccharomyces cerevisiae YIL169c frameshiftpseudogene	.
110	G	Cagl0D	4463	t	R	225	225	35	699	Ref[0];A[27];T[0];G[33];C[0]	Gap[639]	pseudogene	CAGL0D00110g	.	.	-	some similarities with uniprot|P40442 Saccharomyces cerevisiae YIL169c frameshiftpseudogene	.
111	G	Cagl0D	4573	t	A	81	225	37	196	Ref[0];A[28];T[0];G[0];C[0]	Gap[168]	pseudogene	CAGL0D00110g	.	.	-	some similarities with uniprot|P40442 Saccharomyces cerevisiae YIL169c frameshiftpseudogene	.
112	g	Cagl0D	4594	*	-a/-a	221	1853	37	61	-a[25];*[36]	Other[0]	pseudogene	CAGL0D00110g	.	.	-	some similarities with uniprot|P40442 Saccharomyces cerevisiae YIL169c frameshiftpseudogene	.
113	g	Cagl0D	4625	*	-t/-t	101	721	37	21	-t[16];*[5]	Other[0]	pseudogene	CAGL0D00110g	.	.	-	some similarities with uniprot|P40442 Saccharomyces cerevisiae YIL169c frameshiftpseudogene	.
114	g	Cagl0D	354809	*	*/-c	150	150	37	322	*[320];-c[2]	Other[0]	.	LEFT[ CDS:CAGL0D03432g:353289-354491 ];RIGHT[ CDS:CAGL0D03454g:355262-356368 ]	.	.	.	.	.
115	g	Cagl0D	520763	*	*/-t	866	866	37	473	*[463];-t[10]	Other[0]	.	LEFT[ CDS:CAGL0D05434g:518042-518767 ];RIGHT[ CDS:CAGL0D05456g:521445-522071 ]	.	.	.	.	.
116	G	Cagl0D	4641	t	A	225	225	37	128	Ref[0];A[128];T[0];G[0];C[0]	.	pseudogene	CAGL0D00110g	.	.	-	some similarities with uniprot|P40442 Saccharomyces cerevisiae YIL169c frameshiftpseudogene	.
117	G	Cagl0D	520767	g	S	70	70	37	465	Ref[65];A[0];T[0];G[65];C[22]	Gap[378]	.	LEFT[ CDS:CAGL0D05434g:518042-518767 ];RIGHT[ CDS:CAGL0D05456g:521445-522071 ]	.	.	.	.	.
118	G	Cagl0D	651498	a	C	225	225	23	1581	Ref[34];A[34];T[1];G[0];C[1545]	Gap[1]	pseudogene	CAGL0D06732g	.	.	+	some similarities with uniprot|P47179 Saccharomyces cerevisiae YJR151c no start frameshiftpseudogene	.
119	g	Cagl0D	520764	*	-c/*	452	5298	37	473	-c[2];*[471]	Other[0]	.	LEFT[ CDS:CAGL0D05434g:518042-518767 ];RIGHT[ CDS:CAGL0D05456g:521445-522071 ]	.	.	.	.	.
120	G	Cagl0D	651062	a	C	163	225	23	953	Ref[0];A[0];T[0];G[0];C[56]	Gap[897]	pseudogene	CAGL0D06732g	.	.	+	some similarities with uniprot|P47179 Saccharomyces cerevisiae YJR151c no start frameshiftpseudogene	.
121	G	Cagl0D	651377	g	K	64	64	28	391	Ref[300];A[0];T[91];G[300];C[0]	-T[299]	pseudogene	CAGL0D06732g	.	.	+	some similarities with uniprot|P47179 Saccharomyces cerevisiae YJR151c no start frameshiftpseudogene	.
122	g	Cagl0D	651378	*	-a/-a	1297	7228	29	424	-a[1];*[423]	Other[0]	pseudogene	CAGL0D06732g	.	.	+	some similarities with uniprot|P47179 Saccharomyces cerevisiae YJR151c no start frameshiftpseudogene	.
123	G	Cagl0D	651378	t	G	225	225	36	424	Ref[1];A[0];T[1];G[124];C[0]	-A[1];Gap[299]	pseudogene	CAGL0D06732g	.	.	+	some similarities with uniprot|P47179 Saccharomyces cerevisiae YJR151c no start frameshiftpseudogene	.
124	g	Cagl0D	651493	*	-a/-a	5164	20764	25	1722	-a[1];*[1721]	Other[0]	pseudogene	CAGL0D06732g	.	.	+	some similarities with uniprot|P47179 Saccharomyces cerevisiae YJR151c no start frameshiftpseudogene	.
125	g	Cagl0F	2515	*	-g/-g	120	79	32	140	-g[3];*[137]	Other[0]	pseudogene	CAGL0F00110g	.	.	-	no similaritypseudogene	.
126	g	Cagl0E	288537	*	*/-a	3091	3091	37	438	*[433];-a[2]	Other[3]	intron	CAGL0E03069g	GL3R1298	CAG58742.2	-	highly similar to uniprot|P48234 Saccharomyces cerevisiae YGR145w ENP2	product=CAGL0E03069p;db_xref=PhylomeDB:CAGL0E03069g;db_xref=GOA:Q6FVC1;db_xref=InterPro:IPR011046;db_xref=InterPro:IPR012580;db_xref=InterPro:IPR015943;db_xref=UniProtKB/TrEMBL:Q6FVC1;
127	g	Cagl0E	288556	*	*/-c	413	413	37	406	*[400];-c[4]	Other[2]	intron	CAGL0E03069g	GL3R1298	CAG58742.2	-	highly similar to uniprot|P48234 Saccharomyces cerevisiae YGR145w ENP2	product=CAGL0E03069p;db_xref=PhylomeDB:CAGL0E03069g;db_xref=GOA:Q6FVC1;db_xref=InterPro:IPR011046;db_xref=InterPro:IPR012580;db_xref=InterPro:IPR015943;db_xref=UniProtKB/TrEMBL:Q6FVC1;
128	G	Cagl0E	2389	c	G	225	225	36	136	Ref[1];A[0];T[0];G[135];C[1]	.	pseudogene	CAGL0E00110g	.	.	-	some similarities with uniprot|P40442 Saccharomyces cerevisiae YIL169c frameshiftpseudogene	.
129	g	Cagl0E	464051	*	*/-a	8862	8862	32	1278	*[1277];-a[1]	Other[0]	.	LEFT[ CDS:CAGL0E04818g:462438-463712 ];RIGHT[ CDS:CAGL0E04840g:464344-465546 ]	.	.	.	.	.
130	G	Cagl0F	3271	g	R	178	183	33	400	Ref[99];A[299];T[0];G[99];C[1]	Gap[1]	pseudogene	CAGL0F00110g	.	.	-	no similaritypseudogene	.
131	G	Cagl0E	2394	a	W	116	116	34	128	Ref[93];A[93];T[35];G[0];C[0]	+T[55]	pseudogene	CAGL0E00110g	.	.	-	some similarities with uniprot|P40442 Saccharomyces cerevisiae YIL169c frameshiftpseudogene	.
132	g	Cagl0E	224930	*	*/-c	141	141	36	58	*[56];-c[2]	Other[0]	.	LEFT[ CDS:CAGL0E02321g:222703-224817 ];RIGHT[ CDS:CAGL0E02343g:225336-226430 ]	.	.	.	.	.
133	g	Cagl0F	586431	*	-t/-t	158	5117	37	440	-t[3];*[437]	Other[0]	.	LEFT[ CDS:CAGL0F05819g:584882-586189 ];RIGHT[ CDS:CAGL0F05841g:586441-586881 ]	.	.	.	.	.
134	G	Cagl0F	3272	t	R	210	225	33	345	Ref[1];A[94];T[1];G[250];C[0]	.	pseudogene	CAGL0F00110g	.	.	-	no similaritypseudogene	.
135	g	Cagl0F	289864	*	*/-a	36	36	37	273	*[267];-a[6]	Other[0]	.	LEFT[ tRNA:CAGL0F02981r:288415-288496 ];RIGHT[ CDS:CAGL0F03003g:289923-293480 ]	.	.	.	.	.
136	G	Cagl0E	4633	g	C	15	225	31	249	Ref[5];A[0];T[0];G[5];C[15]	Gap[229]	pseudogene	CAGL0E00110g	.	.	-	some similarities with uniprot|P40442 Saccharomyces cerevisiae YIL169c frameshiftpseudogene	.
137	G	Cagl0E	464052	a	W	206	206	31	1448	Ref[639];A[639];T[804];G[4];C[0]	Gap[1]	.	LEFT[ CDS:CAGL0E04818g:462438-463712 ];RIGHT[ CDS:CAGL0E04840g:464344-465546 ]	.	.	.	.	.
138	g	Cagl0E	464054	*	-t/*	19462	30026	32	1866	-t[9];*[1857]	Other[0]	.	LEFT[ CDS:CAGL0E04818g:462438-463712 ];RIGHT[ CDS:CAGL0E04840g:464344-465546 ]	.	.	.	.	.
139	G	Cagl0E	464053	c	M	228	228	32	1685	Ref[629];A[1045];T[11];G[0];C[629]	.	.	LEFT[ CDS:CAGL0E04818g:462438-463712 ];RIGHT[ CDS:CAGL0E04840g:464344-465546 ]	.	.	.	.	.
140	G	Cagl0F	3308	g	T	57	225	37	256	Ref[0];A[0];T[21];G[0];C[0]	Gap[235]	pseudogene	CAGL0F00110g	.	.	-	no similaritypseudogene	.
141	G	Cagl0F	3933	c	M	105	105	36	517	Ref[38];A[20];T[0];G[0];C[38]	Gap[459]	pseudogene	CAGL0F00110g	.	.	-	no similaritypseudogene	.
142	G	Cagl0F	4409	a	W	228	228	36	842	Ref[57];A[57];T[69];G[0];C[0]	Gap[716]	pseudogene	CAGL0F00110g	.	.	-	no similaritypseudogene	.
143	G	Cagl0I	7093	c	A	9	65	37	19	Ref[0];A[6];T[0];G[0];C[0]	Gap[13]	pseudogene	CAGL0I00110g	.	.	-	some similarities with uniprot|P38894 Saccharomyces cerevisiae YHR211w FLO5 no start frameshiftpseudogene	.
144	g	Cagl0E	487049	*	*/-a	213	213	36	290	*[283];-a[7]	Other[0]	.	LEFT[ CDS:CAGL0E05016g:485522-486652 ];RIGHT[ CDS:CAGL0E05038g:488786-493240 ]	.	.	.	.	.
145	G	Cagl0I	616	c	M	228	228	36	2173	Ref[1239];A[934];T[0];G[0];C[1239]	.	.	LEFT[ - ];RIGHT[ pseudogene:CAGL0I00110g:2407-8324 ]	.	.	.	.	.
146	g	Cagl0F	289875	*	*/-a	58	58	37	250	*[249];-a[1]	Other[0]	.	LEFT[ tRNA:CAGL0F02981r:288415-288496 ];RIGHT[ CDS:CAGL0F03003g:289923-293480 ]	.	.	.	.	.
147	G	Cagl0F	1112	g	K	69	69	34	1158	Ref[908];A[0];T[250];G[908];C[0]	.	.	LEFT[ - ];RIGHT[ pseudogene:CAGL0F00110g:1241-4796 ]	.	.	.	.	.
148	g	Cagl0F	3266	*	*/-t	451	451	35	673	*[671];-t[2]	Other[0]	pseudogene	CAGL0F00110g	.	.	-	no similaritypseudogene	.
149	g	Cagl0F	413309	*	*/-g	540	540	37	444	*[443];-g[1]	Other[0]	.	LEFT[ CDS:CAGL0F04125g:411161-412378 ];RIGHT[ CDS:CAGL0F04191g:417993-418265 ]	.	.	.	.	.
150	G	Cagl0I	7094	a	W	19	19	37	16	Ref[13];A[13];T[3];G[0];C[0]	.	pseudogene	CAGL0I00110g	.	.	-	some similarities with uniprot|P38894 Saccharomyces cerevisiae YHR211w FLO5 no start frameshiftpseudogene	.
151	g	Cagl0F	415881	*	*/-a	33	33	36	232	*[227];-a[5]	Other[0]	.	LEFT[ CDS:CAGL0F04125g:411161-412378 ];RIGHT[ CDS:CAGL0F04191g:417993-418265 ]	.	.	.	.	.
152	G	Cagl0F	3140	c	A	132	225	37	53	Ref[0];A[51];T[0];G[2];C[0]	.	pseudogene	CAGL0F00110g	.	.	-	no similaritypseudogene	.
153	g	Cagl0F	3267	*	-c/*	3021	5479	35	606	-c[3];*[603]	Other[0]	pseudogene	CAGL0F00110g	.	.	-	no similaritypseudogene	.
154	G	Cagl0F	3141	t	C	225	225	37	99	Ref[0];A[0];T[0];G[0];C[99]	.	pseudogene	CAGL0F00110g	.	.	-	no similaritypseudogene	.
155	g	Cagl0F	3148	*	-g/-g	1973	9291	35	645	-g[1];*[644]	Other[0]	pseudogene	CAGL0F00110g	.	.	-	no similaritypseudogene	.
156	G	Cagl0F	3154	c	G	225	225	36	1002	Ref[1];A[0];T[0];G[1001];C[1]	.	pseudogene	CAGL0F00110g	.	.	-	no similaritypseudogene	.
157	g	Cagl0F	3273	*	*/+AA	5175	5175	31	259	*[258];+AA[1]	Other[0]	pseudogene	CAGL0F00110g	.	.	-	no similaritypseudogene	.
158	g	Cagl0F	153448	*	*/-g	778	778	36	127	*[120];-g[4]	Other[3]	.	LEFT[ CDS:CAGL0F01485g:151321-152334 ];RIGHT[ CDS:CAGL0F01507g:153593-154864 ]	.	.	.	.	.
159	g	Cagl0F	153460	*	*/-ga	58	58	36	144	*[140];-ga[4]	Other[0]	.	LEFT[ CDS:CAGL0F01485g:151321-152334 ];RIGHT[ CDS:CAGL0F01507g:153593-154864 ]	.	.	.	.	.
160	G	Cagl0F	233920	a	T	225	225	37	576	Ref[9];A[9];T[567];G[0];C[0]	.	.	LEFT[ tRNA:CAGL0F02409r:233357-233429 ];RIGHT[ CDS:CAGL0F02431g:234061-236418 ]	.	.	.	.	.
161	g	Cagl0F	477884	*	*/-ag	115	115	36	169	*[167];-ag[2]	Other[0]	.	LEFT[ CDS:CAGL0F04719g:475180-477294 ];RIGHT[ CDS:CAGL0F04741g:478256-479584 ]	.	.	.	.	.
162	g	Cagl0F	477898	*	*/-gt	240	240	36	163	*[161];-gt[2]	Other[0]	.	LEFT[ CDS:CAGL0F04719g:475180-477294 ];RIGHT[ CDS:CAGL0F04741g:478256-479584 ]	.	.	.	.	.
163	g	Cagl0F	477899	*	*/-t	466	466	36	167	*[162];-t[5]	Other[0]	.	LEFT[ CDS:CAGL0F04719g:475180-477294 ];RIGHT[ CDS:CAGL0F04741g:478256-479584 ]	.	.	.	.	.
164	g	Cagl0F	586421	*	-a/-a	135	3394	37	443	-a[1];*[442]	Other[0]	.	LEFT[ CDS:CAGL0F05819g:584882-586189 ];RIGHT[ CDS:CAGL0F05841g:586441-586881 ]	.	.	.	.	.
165	g	Cagl0G	1024	*	+T/+T	1982	9206	37	928	+T[1];*[927]	Other[0]	.	LEFT[ - ];RIGHT[ pseudogene:CAGL0G00110g:2726-5683 ]	.	.	.	.	.
166	g	Cagl0G	11104	*	*/-tg	1165	1165	37	482	*[473];-tg[9]	Other[0]	.	LEFT[ pseudogene:CAGL0G00110g:2726-5683 ];RIGHT[ CDS:CAGL0G00154g:14591-15892 ]	.	.	.	.	.
167	g	Cagl0G	727640	*	*/-a	34	34	37	175	*[166];-a[8]	Other[1]	.	LEFT[ CDS:CAGL0G07645g:725259-725540 ];RIGHT[ CDS:CAGL0G07667g:728351-729127 ]	.	.	.	.	.
168	g	Cagl0G	807976	*	*/-t	1435	1435	36	343	*[338];-t[3]	Other[2]	.	LEFT[ CDS:CAGL0G08558g:804969-805652 ];RIGHT[ CDS:CAGL0G08602g:808355-811147 ]	.	.	.	.	.
169	G	Cagl0F	586423	g	R	165	165	37	440	Ref[56];A[23];T[0];G[56];C[1]	Gap[360]	.	LEFT[ CDS:CAGL0F05819g:584882-586189 ];RIGHT[ CDS:CAGL0F05841g:586441-586881 ]	.	.	.	.	.
170	g	Cagl0F	866623	*	*/-t	124	124	36	166	*[163];-t[3]	Other[0]	.	LEFT[ CDS:CAGL0F08745g:866073-866333 ];RIGHT[ CDS:CAGL0F08767g:867394-867789 ]	.	.	.	.	.
171	g	Cagl0F	866636	*	*/-a	285	285	36	163	*[162];-a[1]	Other[0]	.	LEFT[ CDS:CAGL0F08745g:866073-866333 ];RIGHT[ CDS:CAGL0F08767g:867394-867789 ]	.	.	.	.	.
172	g	Cagl0G	11141	*	*/+AC	18	18	36	395	*[394];+AC[1]	Other[0]	.	LEFT[ pseudogene:CAGL0G00110g:2726-5683 ];RIGHT[ CDS:CAGL0G00154g:14591-15892 ]	.	.	.	.	.
173	G	Cagl0F	926390	a	Y	225	225	36	1037	Ref[0];A[0];T[55];G[0];C[45]	Gap[937]	CDS	CAGL0F09273g	.	CAG59295.1	+	no similarity	product=CAGL0F09273p;
174	G	Cagl0F	926525	t	W	228	228	37	931	Ref[78];A[43];T[78];G[0];C[0]	Gap[810]	.	LEFT[ CDS:CAGL0F09273g:925942-926406 ];RIGHT[ - ]	.	.	.	.	.
175	g	Cagl0G	807994	*	*/-t	152	152	36	337	*[330];-t[7]	Other[0]	.	LEFT[ CDS:CAGL0G08558g:804969-805652 ];RIGHT[ CDS:CAGL0G08602g:808355-811147 ]	.	.	.	.	.
176	G	Cagl0F	926726	t	M	225	225	36	920	Ref[0];A[46];T[0];G[0];C[50]	Gap[824]	.	LEFT[ CDS:CAGL0F09273g:925942-926406 ];RIGHT[ - ]	.	.	.	.	.
177	g	Cagl0G	18377	*	*/-a	129	129	36	143	*[140];-a[3]	Other[0]	.	LEFT[ CDS:CAGL0G00176g:16581-17540 ];RIGHT[ CDS:CAGL0G00220g:18798-19724 ]	.	.	.	.	.
178	g	Cagl0G	18381	*	*/-c	585	585	36	133	*[126];-c[5]	Other[2]	.	LEFT[ CDS:CAGL0G00176g:16581-17540 ];RIGHT[ CDS:CAGL0G00220g:18798-19724 ]	.	.	.	.	.
179	g	Cagl0G	18395	*	*/-g	86	86	36	121	*[117];-g[3]	Other[1]	.	LEFT[ CDS:CAGL0G00176g:16581-17540 ];RIGHT[ CDS:CAGL0G00220g:18798-19724 ]	.	.	.	.	.
180	g	Cagl0G	167353	*	*/-at	276	276	37	293	*[292];-at[1]	Other[0]	.	LEFT[ CDS:CAGL0G01804g:166048-166908 ];RIGHT[ CDS:CAGL0G01826g:167536-168060 ]	.	.	.	.	.
181	g	Cagl0G	252227	*	*/-a	46	46	36	64	*[61];-a[2]	Other[1]	.	LEFT[ CDS:CAGL0G02717g:249013-250560 ];RIGHT[ CDS:CAGL0G02739g:252478-254559 ]	.	.	.	.	.
182	g	Cagl0G	252228	*	*/-act	55	55	36	61	*[59];-act[2]	Other[0]	.	LEFT[ CDS:CAGL0G02717g:249013-250560 ];RIGHT[ CDS:CAGL0G02739g:252478-254559 ]	.	.	.	.	.
183	G	Cagl0G	4361	t	A	48	193	26	19	Ref[0];A[17];T[0];G[0];C[0]	Gap[2]	pseudogene	CAGL0G00110g	.	.	-	no similarity frameshiftpseudogene	.
184	g	Cagl0G	167371	*	*/-tc	94	94	37	361	*[360];-tc[1]	Other[0]	.	LEFT[ CDS:CAGL0G01804g:166048-166908 ];RIGHT[ CDS:CAGL0G01826g:167536-168060 ]	.	.	.	.	.
185	g	Cagl0G	220625	*	*/-g	105	105	37	193	*[182];-g[5]	Other[6]	.	LEFT[ CDS:CAGL0G02453g:218003-219796 ];RIGHT[ exon:CAGL0G02475g:220990-221368 ]	.	.	.	.	.
186	g	Cagl0G	339537	*	*/-a	87	87	36	329	*[326];-a[3]	Other[0]	.	LEFT[ CDS:CAGL0G03487g:337133-339247 ];RIGHT[ CDS:CAGL0G03509g:340079-342835 ]	.	.	.	.	.
187	g	Cagl0G	339556	*	*/-c	306	306	37	348	*[346];-c[2]	Other[0]	.	LEFT[ CDS:CAGL0G03487g:337133-339247 ];RIGHT[ CDS:CAGL0G03509g:340079-342835 ]	.	.	.	.	.
188	g	Cagl0G	371742	*	*/-c	437	437	36	170	*[159];-c[9]	Other[2]	.	LEFT[ CDS:CAGL0G03905g:370798-371550 ];RIGHT[ CDS:CAGL0G03927g:372896-374599 ]	.	.	.	.	.
189	g	Cagl0G	411126	*	*/-t	73	73	37	243	*[210];-t[1]	Other[32]	.	LEFT[ CDS:CAGL0G04345g:408842-410977 ];RIGHT[ CDS:CAGL0G04367g:411500-413152 ]	.	.	.	.	.
190	g	Cagl0G	448034	*	*/-a	29	29	36	137	*[136];-a[1]	Other[0]	.	LEFT[ CDS:CAGL0G04697g:444732-447584 ];RIGHT[ CDS:CAGL0G04719g:448089-450968 ]	.	.	.	.	.
191	g	Cagl0G	448047	*	*/-t	342	342	36	157	*[153];-t[4]	Other[0]	.	LEFT[ CDS:CAGL0G04697g:444732-447584 ];RIGHT[ CDS:CAGL0G04719g:448089-450968 ]	.	.	.	.	.
192	g	Cagl0G	482867	*	*/-t	358	358	36	105	*[99];-t[6]	Other[0]	.	LEFT[ CDS:CAGL0G05071g:480906-482603 ];RIGHT[ CDS:CAGL0G05093g:483230-484864 ]	.	.	.	.	.
193	g	Cagl0G	917044	*	*/-t	23	23	36	308	*[306];-t[2]	Other[0]	.	LEFT[ CDS:CAGL0G09581g:915515-916813 ];RIGHT[ CDS:CAGL0G09603g:917738-918130 ]	.	.	.	.	.
194	g	Cagl0G	917056	*	*/-t	1080	1080	36	309	*[281];-t[27]	Other[1]	.	LEFT[ CDS:CAGL0G09581g:915515-916813 ];RIGHT[ CDS:CAGL0G09603g:917738-918130 ]	.	.	.	.	.
195	g	Cagl0G	969610	*	*/-a	258	258	36	412	*[400];-a[8]	Other[4]	.	LEFT[ CDS:CAGL0G10109g:967161-969161 ];RIGHT[ CDS:CAGL0G10131g:970915-972009 ]	.	.	.	.	.
196	g	Cagl0H	4678	*	-t/-t	167	1349	36	43	-t[4];+A[18]	Other[21]	pseudogene	CAGL0H00132g	.	.	-	some similarities with uniprot|P08640 Saccharomyces cerevisiae YIR019c STA1 no start frameshiftpseudogene	.
197	g	Cagl0H	7206	*	-t/-t	2073	7643	37	709	-t[1];*[708]	Other[0]	pseudogene	CAGL0H00132g	.	.	-	some similarities with uniprot|P08640 Saccharomyces cerevisiae YIR019c STA1 no start frameshiftpseudogene	.
198	g	Cagl0H	614724	*	*/-tg	81	81	36	199	*[198];-tg[1]	Other[0]	.	LEFT[ CDS:CAGL0H06237g:613054-613962 ];RIGHT[ CDS:CAGL0H06259g:615045-619055 ]	.	.	.	.	.
199	g	Cagl0J	387162	*	-tca/-tca	364	4699	36	152	-tca[1];*[140]	Other[11]	CDS	CAGL0J04114g	GL3C0013	CAG60833.1	-	similar to uniprot|Q99297 Saccharomyces cerevisiae YOR222w ODC2 or uniprot|Q03028 Saccharomyces cerevisiae YPL134c ODC1	inference=similar to AA sequence:UniProtKB:Q99297;product=CAGL0J04114p;db_xref=PhylomeDB:CAGL0J04114g;db_xref=GOA:Q6FPG0;db_xref=InterPro:IPR001993;db_xref=InterPro:IPR002113;db_xref=InterPro:IPR018108;db_xref=UniProtKB/TrEMBL:Q6FPG0;
200	G	Cagl0G	917057	t	K	63	63	37	316	Ref[117];A[0];T[117];G[172];C[0]	Gap[27]	.	LEFT[ CDS:CAGL0G09581g:915515-916813 ];RIGHT[ CDS:CAGL0G09603g:917738-918130 ]	.	.	.	.	.
201	g	Cagl0H	4673	*	-g/-g	275	1949	36	79	-g[26];*[53]	Other[0]	pseudogene	CAGL0H00132g	.	.	-	some similarities with uniprot|P08640 Saccharomyces cerevisiae YIR019c STA1 no start frameshiftpseudogene	.
202	G	Cagl0H	4674	g	A	99	225	37	61	Ref[0];A[35];T[0];G[0];C[0]	Gap[26]	pseudogene	CAGL0H00132g	.	.	-	some similarities with uniprot|P08640 Saccharomyces cerevisiae YIR019c STA1 no start frameshiftpseudogene	.
203	G	Cagl0H	4675	a	M	228	228	36	52	Ref[26];A[26];T[0];G[0];C[26]	.	pseudogene	CAGL0H00132g	.	.	-	some similarities with uniprot|P08640 Saccharomyces cerevisiae YIR019c STA1 no start frameshiftpseudogene	.
204	G	Cagl0H	4756	t	Y	228	228	37	2388	Ref[1569];A[0];T[1569];G[0];C[819]	.	pseudogene	CAGL0H00132g	.	.	-	some similarities with uniprot|P08640 Saccharomyces cerevisiae YIR019c STA1 no start frameshiftpseudogene	.
205	G	Cagl0H	4765	a	G	36	202	37	2639	Ref[0];A[0];T[0];G[14];C[0]	Gap[2625]	pseudogene	CAGL0H00132g	.	.	-	some similarities with uniprot|P08640 Saccharomyces cerevisiae YIR019c STA1 no start frameshiftpseudogene	.
206	G	Cagl0H	4861	a	Y	224	225	37	217	Ref[0];A[0];T[38];G[0];C[43]	Gap[136]	pseudogene	CAGL0H00132g	.	.	-	some similarities with uniprot|P08640 Saccharomyces cerevisiae YIR019c STA1 no start frameshiftpseudogene	.
207	g	Cagl0H	6723	*	-c/-c	1462	7850	37	831	-c[1];*[830]	Other[0]	pseudogene	CAGL0H00132g	.	.	-	some similarities with uniprot|P08640 Saccharomyces cerevisiae YIR019c STA1 no start frameshiftpseudogene	.
208	G	Cagl0H	4863	a	C	225	225	29	142	Ref[6];A[6];T[0];G[0];C[136]	.	pseudogene	CAGL0H00132g	.	.	-	some similarities with uniprot|P08640 Saccharomyces cerevisiae YIR019c STA1 no start frameshiftpseudogene	.
209	G	Cagl0H	5139	a	G	72	225	30	25	Ref[0];A[0];T[0];G[25];C[0]	.	pseudogene	CAGL0H00132g	.	.	-	some similarities with uniprot|P08640 Saccharomyces cerevisiae YIR019c STA1 no start frameshiftpseudogene	.
210	G	Cagl0H	6720	t	Y	186	186	37	825	Ref[76];A[0];T[76];G[0];C[30]	Gap[719]	pseudogene	CAGL0H00132g	.	.	-	some similarities with uniprot|P08640 Saccharomyces cerevisiae YIR019c STA1 no start frameshiftpseudogene	.
211	G	Cagl0H	6724	c	A	225	225	37	826	Ref[43];A[781];T[0];G[0];C[43]	Gap[2]	pseudogene	CAGL0H00132g	.	.	-	some similarities with uniprot|P08640 Saccharomyces cerevisiae YIR019c STA1 no start frameshiftpseudogene	.
212	G	Cagl0H	6845	c	W	225	225	36	585	Ref[0];A[36];T[65];G[0];C[0]	Gap[484]	pseudogene	CAGL0H00132g	.	.	-	some similarities with uniprot|P08640 Saccharomyces cerevisiae YIR019c STA1 no start frameshiftpseudogene	.
213	G	Cagl0H	6903	g	K	190	190	37	555	Ref[35];A[0];T[20];G[35];C[0]	Gap[500]	pseudogene	CAGL0H00132g	.	.	-	some similarities with uniprot|P08640 Saccharomyces cerevisiae YIR019c STA1 no start frameshiftpseudogene	.
214	G	Cagl0H	7072	c	M	200	200	36	456	Ref[69];A[33];T[0];G[0];C[69]	Gap[354]	pseudogene	CAGL0H00132g	.	.	-	some similarities with uniprot|P08640 Saccharomyces cerevisiae YIR019c STA1 no start frameshiftpseudogene	.
215	G	Cagl0H	7119	a	W	228	228	37	470	Ref[33];A[33];T[22];G[0];C[0]	Gap[415]	pseudogene	CAGL0H00132g	.	.	-	some similarities with uniprot|P08640 Saccharomyces cerevisiae YIR019c STA1 no start frameshiftpseudogene	.
216	g	Cagl0H	330868	*	*/-g	255	255	36	84	*[77];-g[3]	Other[4]	.	LEFT[ CDS:CAGL0H03553g:328668-330155 ];RIGHT[ CDS:CAGL0H03575g:331303-332847 ]	.	.	.	.	.
217	g	Cagl0H	330881	*	*/-gc	119	119	36	79	*[78];-gc[1]	Other[0]	.	LEFT[ CDS:CAGL0H03553g:328668-330155 ];RIGHT[ CDS:CAGL0H03575g:331303-332847 ]	.	.	.	.	.
218	g	Cagl0H	330888	*	*/+A	98	98	36	92	*[87];+A[5]	Other[0]	.	LEFT[ CDS:CAGL0H03553g:328668-330155 ];RIGHT[ CDS:CAGL0H03575g:331303-332847 ]	.	.	.	.	.
219	G	Cagl0H	7208	g	K	228	228	36	713	Ref[30];A[1];T[33];G[30];C[0]	Gap[649]	pseudogene	CAGL0H00132g	.	.	-	some similarities with uniprot|P08640 Saccharomyces cerevisiae YIR019c STA1 no start frameshiftpseudogene	.
220	g	Cagl0H	614749	*	*/-g	77	77	36	160	*[152];-g[8]	Other[0]	.	LEFT[ CDS:CAGL0H06237g:613054-613962 ];RIGHT[ CDS:CAGL0H06259g:615045-619055 ]	.	.	.	.	.
221	g	Cagl0H	717054	*	*/-a	277	277	37	332	*[315];-a[17]	Other[0]	.	LEFT[ CDS:CAGL0H07315g:715930-716766 ];RIGHT[ CDS:CAGL0H07337g:718141-718590 ]	.	.	.	.	.
222	g	Cagl0H	730890	*	*/-g	38	38	36	90	*[89];-g[1]	Other[0]	.	LEFT[ CDS:CAGL0H07469g:729381-730061 ];RIGHT[ CDS:CAGL0H07491g:732854-734389 ]	.	.	.	.	.
223	g	Cagl0H	730891	*	*/-t	123	123	36	87	*[85];-t[2]	Other[0]	.	LEFT[ CDS:CAGL0H07469g:729381-730061 ];RIGHT[ CDS:CAGL0H07491g:732854-734389 ]	.	.	.	.	.
224	g	Cagl0H	730892	*	*/-g	415	415	36	85	*[80];-g[3]	Other[2]	.	LEFT[ CDS:CAGL0H07469g:729381-730061 ];RIGHT[ CDS:CAGL0H07491g:732854-734389 ]	.	.	.	.	.
225	g	Cagl0H	844894	*	*/-c	384	384	36	156	*[148];-c[4]	Other[4]	.	LEFT[ CDS:CAGL0H08602g:843298-844737 ];RIGHT[ CDS:CAGL0H08624g:845036-845593 ]	.	.	.	.	.
226	g	Cagl0I	405	*	*/+G	986	986	37	992	*[892];+G[100]	Other[0]	.	LEFT[ - ];RIGHT[ pseudogene:CAGL0I00110g:2407-8324 ]	.	.	.	.	.
227	g	Cagl0I	593845	*	*/-g	107	107	36	202	*[198];-g[1]	Other[3]	.	LEFT[ CDS:CAGL0I06182g:592439-593461 ];RIGHT[ CDS:CAGL0I06204g:595682-596731 ]	.	.	.	.	.
228	g	Cagl0I	7092	*	-c/-c	113	569	37	25	-c[13];*[12]	Other[0]	pseudogene	CAGL0I00110g	.	.	-	some similarities with uniprot|P38894 Saccharomyces cerevisiae YHR211w FLO5 no start frameshiftpseudogene	.
229	g	Cagl0I	7121	*	-c/-c	134	1151	37	32	-c[26];*[6]	Other[0]	pseudogene	CAGL0I00110g	.	.	-	some similarities with uniprot|P38894 Saccharomyces cerevisiae YHR211w FLO5 no start frameshiftpseudogene	.
230	g	Cagl0I	42804	*	*/-g	361	361	36	171	*[167];-g[1]	Other[3]	.	LEFT[ CDS:CAGL0I00550g:41539-41775 ];RIGHT[ CDS:CAGL0I00572g:43780-44097 ]	.	.	.	.	.
231	g	Cagl0I	52412	*	*/-t	105	105	36	425	*[421];-t[4]	Other[0]	.	LEFT[ CDS:CAGL0I00704g:51136-51966 ];RIGHT[ CDS:CAGL0I00726g:52542-52931 ]	.	.	.	.	.
232	g	Cagl0I	932481	*	*/-ac	2503	2503	36	329	*[328];-ac[1]	Other[0]	.	LEFT[ CDS:CAGL0I09746g:931000-932391 ];RIGHT[ CDS:CAGL0I09768g:933082-934608 ]	.	.	.	.	.
233	G	Cagl0I	7075	t	Y	31	31	37	106	Ref[86];A[0];T[86];G[0];C[20]	.	pseudogene	CAGL0I00110g	.	.	-	some similarities with uniprot|P38894 Saccharomyces cerevisiae YHR211w FLO5 no start frameshiftpseudogene	.
234	g	Cagl0I	52424	*	*/-t	210	210	36	404	*[390];-t[14]	Other[0]	.	LEFT[ CDS:CAGL0I00704g:51136-51966 ];RIGHT[ CDS:CAGL0I00726g:52542-52931 ]	.	.	.	.	.
235	g	Cagl0I	593866	*	*/-g	69	69	36	209	*[204];-g[3]	Other[2]	.	LEFT[ CDS:CAGL0I06182g:592439-593461 ];RIGHT[ CDS:CAGL0I06204g:595682-596731 ]	.	.	.	.	.
236	g	Cagl0I	281200	*	*/-t	142	142	37	314	*[312];-t[1]	Other[1]	.	LEFT[ CDS:CAGL0I03256g:279779-280867 ];RIGHT[ tRNA:CAGL0I03278r:281221-281292 ]	.	.	.	.	.
237	G	Cagl0I	7121	t	K	27	27	37	32	Ref[26];A[0];T[26];G[6];C[0]	-C[26]	pseudogene	CAGL0I00110g	.	.	-	some similarities with uniprot|P38894 Saccharomyces cerevisiae YHR211w FLO5 no start frameshiftpseudogene	.
238	G	Cagl0I	7122	c	T	36	213	37	40	Ref[0];A[0];T[14];G[0];C[0]	Gap[26]	pseudogene	CAGL0I00110g	.	.	-	some similarities with uniprot|P38894 Saccharomyces cerevisiae YHR211w FLO5 no start frameshiftpseudogene	.
239	G	Cagl0I	53677	t	Y	27	27	36	248	Ref[131];A[1];T[131];G[2];C[111]	-CC[1];Gap[3];-C[12];+C[1]	.	LEFT[ CDS:CAGL0I00726g:52542-52931 ];RIGHT[ CDS:CAGL0I00748g:53816-55408 ]	.	.	.	.	.
240	g	Cagl0I	1026917	*	*/-g	313	313	36	148	*[138];-g[7]	Other[3]	.	LEFT[ CDS:CAGL0I10362g:1020373-1025691 ];RIGHT[ CDS:CAGL0I10384g:1027883-1029775 ]	.	.	.	.	.
241	g	Cagl0I	1068397	*	*/-c	698	698	37	626	*[562];-c[1]	Other[63]	.	LEFT[ CDS:CAGL0I10791g:1066916-1067896 ];RIGHT[ CDS:CAGL0I10813g:1069404-1070108 ]	.	.	.	.	.
242	G	Cagl0I	248678	a	W	174	174	36	228	Ref[13];A[13];T[13];G[1];C[0]	Gap[201]	CDS	CAGL0I02816g	GL3C0752	CAG60310.1	-	similar to uniprot|P41696 Saccharomyces cerevisiae YOR113w AZF1 asparagine-rich zinc finger protein	inference=similar to AA sequence:UniProtKB:P41696;product=CAGL0I02816p;db_xref=GOA:Q6FQX1;db_xref=InterPro:IPR007087;db_xref=InterPro:IPR013087;db_xref=InterPro:IPR015880;db_xref=UniProtKB/TrEMBL:Q6FQX1;
243	g	Cagl0I	569624	*	*/-g	433	433	35	100	*[96];-g[2]	Other[2]	.	LEFT[ CDS:CAGL0I05962g:567117-568832 ];RIGHT[ CDS:CAGL0I05984g:569761-570963 ]	.	.	.	.	.
244	G	Cagl0I	248723	g	S	192	192	37	279	Ref[14];A[0];T[0];G[14];C[18]	Gap[247]	CDS	CAGL0I02838g	GL3C0752	CAG60311.1	-	(ohnolog of CAGL0L03916g), similar to uniprot|P41696 Saccharomyces cerevisiae YOR113w AZF1 asparagine-rich zinc finger protein	inference=similar to AA sequence:UniProtKB:P41696;ohnolog=CAGL0L03916g;product=CAGL0I02838p;db_xref=PhylomeDB:CAGL0I02838g;db_xref=GOA:Q6FQX0;db_xref=InterPro:IPR007087;db_xref=InterPro:IPR013087;db_xref=InterPro:IPR015880;db_xref=UniProtKB/TrEMBL:Q6FQX0;
245	g	Cagl0J	179562	*	*/-c	85	85	36	271	*[267];-c[3]	Other[1]	.	LEFT[ tRNA:CAGL0J01826r:179238-179310 ];RIGHT[ CDS:CAGL0J01848g:179922-183530 ]	.	.	.	.	.
246	G	Cagl0J	2926	g	A	36	196	29	186	Ref[0];A[13];T[0];G[0];C[0]	Gap[173]	pseudogene	CAGL0J00110g	.	.	-	no similarity frameshiftpseudogene	.
247	g	Cagl0J	33920	*	*/-c	365	365	36	207	*[205];-c[2]	Other[0]	.	LEFT[ CDS:CAGL0J00407g:31269-32894 ];RIGHT[ CDS:CAGL0J00429g:34645-35103 ]	.	.	.	.	.
248	g	Cagl0J	69985	*	*/-c	2176	2176	37	464	*[458];-c[3]	Other[3]	.	LEFT[ CDS:CAGL0J00693g:61246-66900 ];RIGHT[ CDS:CAGL0J00715g:70057-70941 ]	.	.	.	.	.
249	g	Cagl0J	179585	*	*/-ttc	361	361	36	263	*[262];-ttc[1]	Other[0]	.	LEFT[ tRNA:CAGL0J01826r:179238-179310 ];RIGHT[ CDS:CAGL0J01848g:179922-183530 ]	.	.	.	.	.
250	g	Cagl0J	179586	*	*/-tc	550	550	36	282	*[279];-tc[2]	Other[1]	.	LEFT[ tRNA:CAGL0J01826r:179238-179310 ];RIGHT[ CDS:CAGL0J01848g:179922-183530 ]	.	.	.	.	.
251	g	Cagl0J	179587	*	*/-c	462	462	36	289	*[272];-c[15]	Other[2]	.	LEFT[ tRNA:CAGL0J01826r:179238-179310 ];RIGHT[ CDS:CAGL0J01848g:179922-183530 ]	.	.	.	.	.
252	g	Cagl0J	203287	*	*/-a	182	182	36	318	*[309];-a[9]	Other[0]	.	LEFT[ CDS:CAGL0J02002g:200829-201914 ];RIGHT[ CDS:CAGL0J02024g:203412-204836 ]	.	.	.	.	.
253	G	Cagl0J	203288	a	W	77	77	35	318	Ref[192];A[192];T[116];G[0];C[0]	+T[3];+TT[1];Gap[10];-TT[1];-T[21];-TTT[2]	.	LEFT[ CDS:CAGL0J02002g:200829-201914 ];RIGHT[ CDS:CAGL0J02024g:203412-204836 ]	.	.	.	.	.
254	g	Cagl0J	203308	*	*/-a	123	123	36	330	*[327];-a[3]	Other[0]	.	LEFT[ CDS:CAGL0J02002g:200829-201914 ];RIGHT[ CDS:CAGL0J02024g:203412-204836 ]	.	.	.	.	.
255	g	Cagl0J	383765	*	*/-t	12	12	36	265	*[260];-t[5]	Other[0]	.	LEFT[ CDS:CAGL0J04026g:379502-383098 ];RIGHT[ CDS:CAGL0J04048g:383930-384367 ]	.	.	.	.	.
256	g	Cagl0J	383777	*	*/-t	56	56	36	265	*[251];-t[14]	Other[0]	.	LEFT[ CDS:CAGL0J04026g:379502-383098 ];RIGHT[ CDS:CAGL0J04048g:383930-384367 ]	.	.	.	.	.
257	g	Cagl0J	387161	*	-c/-c	464	5849	36	152	-c[106];*[46]	Other[0]	CDS	CAGL0J04114g	GL3C0013	CAG60833.1	-	similar to uniprot|Q99297 Saccharomyces cerevisiae YOR222w ODC2 or uniprot|Q03028 Saccharomyces cerevisiae YPL134c ODC1	inference=similar to AA sequence:UniProtKB:Q99297;product=CAGL0J04114p;db_xref=PhylomeDB:CAGL0J04114g;db_xref=GOA:Q6FPG0;db_xref=InterPro:IPR001993;db_xref=InterPro:IPR002113;db_xref=InterPro:IPR018108;db_xref=UniProtKB/TrEMBL:Q6FPG0;
258	G	Cagl0J	387197	c	M	145	145	37	175	Ref[13];A[10];T[0];G[0];C[13]	Gap[152]	CDS	CAGL0J04114g	GL3C0013	CAG60833.1	-	similar to uniprot|Q99297 Saccharomyces cerevisiae YOR222w ODC2 or uniprot|Q03028 Saccharomyces cerevisiae YPL134c ODC1	inference=similar to AA sequence:UniProtKB:Q99297;product=CAGL0J04114p;db_xref=PhylomeDB:CAGL0J04114g;db_xref=GOA:Q6FPG0;db_xref=InterPro:IPR001993;db_xref=InterPro:IPR002113;db_xref=InterPro:IPR018108;db_xref=UniProtKB/TrEMBL:Q6FPG0;
259	G	Cagl0J	1189759	a	K	10	170	37	9	Ref[0];A[0];T[1];G[8];C[0]	.	pseudogene	CAGL0J11990g	.	.	+	some similarities with uniprot|P38739 Saccharomyces cerevisiae YHL028w WSC4 no start frameshiftpseudogene	.
260	G	Cagl0K	1632	t	Y	14	14	36	3055	Ref[2440];A[0];T[2440];G[0];C[615]	.	.	LEFT[ - ];RIGHT[ CDS:CAGL0K00110g:3332-5830 ]	.	.	.	.	.
261	g	Cagl0K	724227	*	*/+G	477	477	37	257	*[250];+G[2]	Other[5]	.	LEFT[ CDS:CAGL0K07315g:722554-722829 ];RIGHT[ CDS:CAGL0K07337g:724973-725914 ]	.	.	.	.	.
262	G	Cagl0J	387162	c	Y	164	228	35	152	Ref[12];A[0];T[34];G[0];C[12]	-TCA[1];Gap[106];+A[11]	CDS	CAGL0J04114g	GL3C0013	CAG60833.1	-	similar to uniprot|Q99297 Saccharomyces cerevisiae YOR222w ODC2 or uniprot|Q03028 Saccharomyces cerevisiae YPL134c ODC1	inference=similar to AA sequence:UniProtKB:Q99297;product=CAGL0J04114p;db_xref=PhylomeDB:CAGL0J04114g;db_xref=GOA:Q6FPG0;db_xref=InterPro:IPR001993;db_xref=InterPro:IPR002113;db_xref=InterPro:IPR018108;db_xref=UniProtKB/TrEMBL:Q6FPG0;
263	g	Cagl0K	402925	*	*/-t	128	128	36	71	*[69];-t[1]	Other[1]	.	LEFT[ CDS:CAGL0K04279g:397602-398156 ];RIGHT[ CDS:CAGL0K04301g:405248-406315 ]	.	.	.	.	.
264	g	Cagl0K	1049517	*	*/-g	1810	1810	37	337	*[324];-g[9]	Other[4]	intron	CAGL0K10780g	GL3R0671	CAG61648.1	+	highly similar to uniprot|P50094 Saccharomyces cerevisiae YML056c IMD4 or uniprot|P50095 Saccharomyces cerevisiae YLR432w IMD3 or uniprot|P38697 Saccharomyces cerevisiae YHR216w PUR5	product=CAGL0K10780p;db_xref=PhylomeDB:CAGL0K10780g;db_xref=GOA:Q6FM59;db_xref=InterPro:IPR000644;db_xref=InterPro:IPR001093;db_xref=InterPro:IPR005990;db_xref=InterPro:IPR013785;db_xref=InterPro:IPR015875;db_xref=InterPro:IPR018529;db_xref=UniProtKB/TrEMBL:Q6FM59;
265	G	Cagl0J	387163	t	Y	90	90	36	159	Ref[125];A[0];T[125];G[0];C[33]	Gap[1]	CDS	CAGL0J04114g	GL3C0013	CAG60833.1	-	similar to uniprot|Q99297 Saccharomyces cerevisiae YOR222w ODC2 or uniprot|Q03028 Saccharomyces cerevisiae YPL134c ODC1	inference=similar to AA sequence:UniProtKB:Q99297;product=CAGL0J04114p;db_xref=PhylomeDB:CAGL0J04114g;db_xref=GOA:Q6FPG0;db_xref=InterPro:IPR001993;db_xref=InterPro:IPR002113;db_xref=InterPro:IPR018108;db_xref=UniProtKB/TrEMBL:Q6FPG0;
266	g	Cagl0K	1049537	*	*/-t	87	87	36	299	*[298];-t[1]	Other[0]	intron	CAGL0K10780g	GL3R0671	CAG61648.1	+	highly similar to uniprot|P50094 Saccharomyces cerevisiae YML056c IMD4 or uniprot|P50095 Saccharomyces cerevisiae YLR432w IMD3 or uniprot|P38697 Saccharomyces cerevisiae YHR216w PUR5	product=CAGL0K10780p;db_xref=PhylomeDB:CAGL0K10780g;db_xref=GOA:Q6FM59;db_xref=InterPro:IPR000644;db_xref=InterPro:IPR001093;db_xref=InterPro:IPR005990;db_xref=InterPro:IPR013785;db_xref=InterPro:IPR015875;db_xref=InterPro:IPR018529;db_xref=UniProtKB/TrEMBL:Q6FM59;
267	G	Cagl0J	1190457	a	C	6	53	37	66	Ref[0];A[0];T[0];G[0];C[3]	Gap[63]	pseudogene	CAGL0J11990g	.	.	+	some similarities with uniprot|P38739 Saccharomyces cerevisiae YHL028w WSC4 no start frameshiftpseudogene	.
268	g	Cagl0J	574140	*	*/-t	25	25	36	125	*[124];-t[1]	Other[0]	.	LEFT[ CDS:CAGL0J06050g:571225-572331 ];RIGHT[ CDS:CAGL0J06072g:574501-576822 ]	.	.	.	.	.
269	g	Cagl0J	574158	*	*/-a	140	140	36	100	*[98];-a[2]	Other[0]	.	LEFT[ CDS:CAGL0J06050g:571225-572331 ];RIGHT[ CDS:CAGL0J06072g:574501-576822 ]	.	.	.	.	.
270	g	Cagl0J	642938	*	*/-c	257	257	37	254	*[253];-c[1]	Other[0]	.	LEFT[ CDS:CAGL0J06688g:640041-642527 ];RIGHT[ CDS:CAGL0J06710g:644531-645397 ]	.	.	.	.	.
271	g	Cagl0J	642939	*	*/-g	1930	1930	37	248	*[243];-g[3]	Other[2]	.	LEFT[ CDS:CAGL0J06688g:640041-642527 ];RIGHT[ CDS:CAGL0J06710g:644531-645397 ]	.	.	.	.	.
272	g	Cagl0J	969967	*	*/-t	79	79	36	236	*[230];-t[6]	Other[0]	.	LEFT[ CDS:CAGL0J09900g:969083-969934 ];RIGHT[ CDS:CAGL0J09922g:973259-974542 ]	.	.	.	.	.
273	g	Cagl0J	1188867	*	-c/-c	2281	8105	37	791	-c[1];*[790]	Other[0]	pseudogene	CAGL0J11990g	.	.	+	some similarities with uniprot|P38739 Saccharomyces cerevisiae YHL028w WSC4 no start frameshiftpseudogene	.
274	G	Cagl0J	1188869	a	C	129	225	37	803	Ref[1];A[1];T[0];G[0];C[45]	Gap[757]	pseudogene	CAGL0J11990g	.	.	+	some similarities with uniprot|P38739 Saccharomyces cerevisiae YHL028w WSC4 no start frameshiftpseudogene	.
275	G	Cagl0J	1189617	g	K	172	172	36	155	Ref[109];A[1];T[45];G[109];C[0]	.	pseudogene	CAGL0J11990g	.	.	+	some similarities with uniprot|P38739 Saccharomyces cerevisiae YHL028w WSC4 no start frameshiftpseudogene	.
276	G	Cagl0J	1189618	t	W	144	144	36	147	Ref[109];A[38];T[109];G[0];C[0]	.	pseudogene	CAGL0J11990g	.	.	+	some similarities with uniprot|P38739 Saccharomyces cerevisiae YHL028w WSC4 no start frameshiftpseudogene	.
277	g	Cagl0J	1190245	*	-a/-a	3218	13869	20	1060	-a[6];*[1054]	Other[0]	pseudogene	CAGL0J11990g	.	.	+	some similarities with uniprot|P38739 Saccharomyces cerevisiae YHL028w WSC4 no start frameshiftpseudogene	.
278	G	Cagl0K	334	a	R	228	228	34	2770	Ref[1185];A[1185];T[0];G[1582];C[1]	Gap[2]	.	LEFT[ - ];RIGHT[ CDS:CAGL0K00110g:3332-5830 ]	.	.	.	.	.
279	g	Cagl0J	1190249	*	-g/-g	3218	11442	20	1060	-g[1];*[1059]	Other[0]	pseudogene	CAGL0J11990g	.	.	+	some similarities with uniprot|P38739 Saccharomyces cerevisiae YHL028w WSC4 no start frameshiftpseudogene	.
280	g	Cagl0J	1190456	*	-a/-a	236	2569	37	66	-a[63];*[3]	Other[0]	pseudogene	CAGL0J11990g	.	.	+	some similarities with uniprot|P38739 Saccharomyces cerevisiae YHL028w WSC4 no start frameshiftpseudogene	.
281	g	Cagl0J	1190997	*	-t/-t	23087	95565	34	7794	-t[7];*[7786]	Other[1]	pseudogene	CAGL0J11990g	.	.	+	some similarities with uniprot|P38739 Saccharomyces cerevisiae YHL028w WSC4 no start frameshiftpseudogene	.
282	g	Cagl0J	1190999	*	-t/-t	21148	101051	34	7777	-t[3];*[7744]	Other[30]	pseudogene	CAGL0J11990g	.	.	+	some similarities with uniprot|P38739 Saccharomyces cerevisiae YHL028w WSC4 no start frameshiftpseudogene	.
283	G	Cagl0J	1190999	g	T	225	225	33	7777	Ref[37];A[14];T[1324];G[37];C[9]	+T[30];Gap[6393];-T[3]	pseudogene	CAGL0J11990g	.	.	+	some similarities with uniprot|P38739 Saccharomyces cerevisiae YHL028w WSC4 no start frameshiftpseudogene	.
284	g	Cagl0J	1194105	*	*/-aac	39542	39542	37	2000	*[1998];-aac[2]	Other[0]	.	LEFT[ pseudogene:CAGL0J11990g:1188177-1192028 ];RIGHT[ - ]	.	.	.	.	.
285	g	Cagl0K	112161	*	*/-c	201	201	36	175	*[169];-c[6]	Other[0]	.	LEFT[ CDS:CAGL0K01155g:111197-111808 ];RIGHT[ CDS:CAGL0K01177g:112575-113147 ]	.	.	.	.	.
286	g	Cagl0K	112174	*	*/-a	260	260	36	188	*[175];-a[13]	Other[0]	.	LEFT[ CDS:CAGL0K01155g:111197-111808 ];RIGHT[ CDS:CAGL0K01177g:112575-113147 ]	.	.	.	.	.
287	g	Cagl0K	310531	*	*/-g	328	328	36	119	*[117];-g[2]	Other[0]	.	LEFT[ CDS:CAGL0K03377g:307358-310294 ];RIGHT[ CDS:CAGL0K03399g:311316-313427 ]	.	.	.	.	.
288	g	Cagl0K	1011052	*	*/-g	162	162	37	275	*[266];-g[9]	Other[0]	.	LEFT[ CDS:CAGL0K10362g:1009984-1010889 ];RIGHT[ CDS:CAGL0K10384g:1011380-1017694 ]	.	.	.	.	.
289	g	Cagl0K	319045	*	*/-tg	241	241	37	223	*[218];-tg[5]	Other[0]	.	LEFT[ CDS:CAGL0K03443g:317197-319044 ];RIGHT[ CDS:CAGL0K03459g:319329-319613 ]	.	.	.	.	.
290	G	Cagl0K	154991	t	G	30	189	33	25	Ref[0];A[0];T[0];G[24];C[0]	Gap[1]	.	LEFT[ CDS:CAGL0K01727g:153398-154897 ];RIGHT[ CDS:CAGL0K01749g:155385-159134 ]	.	.	.	.	.
291	g	Cagl0K	402928	*	*/-c	252	252	36	68	*[65];-c[2]	Other[1]	.	LEFT[ CDS:CAGL0K04279g:397602-398156 ];RIGHT[ CDS:CAGL0K04301g:405248-406315 ]	.	.	.	.	.
292	G	Cagl0M	1402439	a	W	228	228	35	1222	Ref[367];A[367];T[848];G[1];C[6]	.	.	LEFT[ CDS:CAGL0M14113g:1397407-1399152 ];RIGHT[ - ]	.	.	.	.	.
293	G	Cagl0K	744342	g	K	193	193	36	521	Ref[27];A[0];T[16];G[27];C[0]	Gap[478]	.	LEFT[ CDS:CAGL0K07524g:743156-744133 ];RIGHT[ CDS:CAGL0K07546g:745201-746172 ]	.	.	.	.	.
294	G	Cagl0M	1402441	a	M	228	228	36	1620	Ref[546];A[546];T[0];G[0];C[1074]	.	.	LEFT[ CDS:CAGL0M14113g:1397407-1399152 ];RIGHT[ - ]	.	.	.	.	.
295	g	Cagl0K	1071193	*	*/-gc	704	704	37	554	*[553];-gc[1]	Other[0]	.	LEFT[ CDS:CAGL0K10956g:1070703-1070906 ];RIGHT[ CDS:CAGL0K10978g:1071625-1073694 ]	.	.	.	.	.
296	g	Cagl0K	1199722	*	*/-aa	1679	1679	37	551	*[550];-aa[1]	Other[0]	.	LEFT[ CDS:CAGL0K12254g:1197205-1198212 ];RIGHT[ CDS:CAGL0K12276g:1199934-1200518 ]	.	.	.	.	.
297	g	Cagl0K	1251466	*	*/-a	2003	2003	36	362	*[351];-a[6]	Other[5]	.	LEFT[ CDS:CAGL0K12628g:1246877-1250857 ];RIGHT[ CDS:CAGL0K12650g:1252736-1254094 ]	.	.	.	.	.
298	g	Cagl0K	1251486	*	*/-tg	229	229	36	351	*[350];-tg[1]	Other[0]	.	LEFT[ CDS:CAGL0K12628g:1246877-1250857 ];RIGHT[ CDS:CAGL0K12650g:1252736-1254094 ]	.	.	.	.	.
299	g	Cagl0K	1251487	*	*/-g	322	322	36	362	*[358];-g[4]	Other[0]	.	LEFT[ CDS:CAGL0K12628g:1246877-1250857 ];RIGHT[ CDS:CAGL0K12650g:1252736-1254094 ]	.	.	.	.	.
300	g	Cagl0K	1258110	*	*/-t	41	41	36	154	*[151];-t[3]	Other[0]	.	LEFT[ CDS:CAGL0K12672g:1256370-1256990 ];RIGHT[ exon:CAGL0K12694g:1258451-1258460 ]	.	.	.	.	.
301	g	Cagl0K	1258113	*	*/-t	279	279	36	144	*[138];-t[6]	Other[0]	.	LEFT[ CDS:CAGL0K12672g:1256370-1256990 ];RIGHT[ exon:CAGL0K12694g:1258451-1258460 ]	.	.	.	.	.
302	g	Cagl0K	1258127	*	*/-a	223	223	36	138	*[136];-a[2]	Other[0]	.	LEFT[ CDS:CAGL0K12672g:1256370-1256990 ];RIGHT[ exon:CAGL0K12694g:1258451-1258460 ]	.	.	.	.	.
303	g	Cagl0K	1258128	*	*/-t	13	13	36	151	*[150];-t[1]	Other[0]	.	LEFT[ CDS:CAGL0K12672g:1256370-1256990 ];RIGHT[ exon:CAGL0K12694g:1258451-1258460 ]	.	.	.	.	.
304	g	Cagl0L	444949	*	*/-c	664	664	36	213	*[208];-c[2]	Other[3]	intron	CAGL0L03846g	GL3C0001	CAG61911.1	-	highly similar to uniprot|P24783 Saccharomyces cerevisiae YNL112w DBP2 ATP-dependent RNA helicase of DEAD box family	product=CAGL0L03846p;db_xref=PhylomeDB:CAGL0L03846g;db_xref=GOA:Q6FLF3;db_xref=InterPro:IPR000629;db_xref=InterPro:IPR001650;db_xref=InterPro:IPR011545;db_xref=InterPro:IPR014001;db_xref=InterPro:IPR014014;db_xref=InterPro:IPR014021;db_xref=UniProtKB/Swiss-Prot:Q6FLF3;
305	g	Cagl0L	444972	*	*/-at	244	244	36	168	*[167];-at[1]	Other[0]	intron	CAGL0L03846g	GL3C0001	CAG61911.1	-	highly similar to uniprot|P24783 Saccharomyces cerevisiae YNL112w DBP2 ATP-dependent RNA helicase of DEAD box family	product=CAGL0L03846p;db_xref=PhylomeDB:CAGL0L03846g;db_xref=GOA:Q6FLF3;db_xref=InterPro:IPR000629;db_xref=InterPro:IPR001650;db_xref=InterPro:IPR011545;db_xref=InterPro:IPR014001;db_xref=InterPro:IPR014014;db_xref=InterPro:IPR014021;db_xref=UniProtKB/Swiss-Prot:Q6FLF3;
306	g	Cagl0L	634940	*	*/-g	160	160	36	185	*[176];-g[9]	Other[0]	.	LEFT[ CDS:CAGL0L05742g:632841-633758 ];RIGHT[ tRNA:CAGL0L05764r:635740-635812 ]	.	.	.	.	.
307	g	Cagl0L	642809	*	*/-g	261	261	37	344	*[339];-g[5]	Other[0]	.	LEFT[ CDS:CAGL0L05786g:638173-639219 ];RIGHT[ CDS:CAGL0L05830g:651511-652161 ]	.	.	.	.	.
308	g	Cagl0L	836597	*	*/-g	222	222	36	84	*[82];-g[2]	Other[0]	.	LEFT[ CDS:CAGL0L07546g:833821-835725 ];RIGHT[ CDS:CAGL0L07568g:837393-837713 ]	.	.	.	.	.
309	g	Cagl0L	836613	*	*/-t	20	20	36	74	*[72];-t[2]	Other[0]	.	LEFT[ CDS:CAGL0L07546g:833821-835725 ];RIGHT[ CDS:CAGL0L07568g:837393-837713 ]	.	.	.	.	.
310	g	Cagl0L	910219	*	*/-a	1493	1493	36	228	*[225];-a[2]	Other[1]	.	LEFT[ CDS:CAGL0L08228g:909154-910155 ];RIGHT[ CDS:CAGL0L08250g:910339-912927 ]	.	.	.	.	.
311	g	Cagl0L	910237	*	*/-a	271	271	36	239	*[234];-a[5]	Other[0]	.	LEFT[ CDS:CAGL0L08228g:909154-910155 ];RIGHT[ CDS:CAGL0L08250g:910339-912927 ]	.	.	.	.	.
312	g	Cagl0L	1098147	*	*/-a	71	71	36	140	*[138];-a[1]	Other[1]	.	LEFT[ CDS:CAGL0L10186g:1097104-1097625 ];RIGHT[ CDS:CAGL0L10208g:1098507-1100222 ]	.	.	.	.	.
313	g	Cagl0L	1131013	*	*/-t	35	35	37	223	*[219];-t[4]	Other[0]	.	LEFT[ CDS:CAGL0L10560g:1128132-1129742 ];RIGHT[ CDS:CAGL0L10582g:1131528-1134824 ]	.	.	.	.	.
314	g	Cagl0L	1245289	*	*/-g	1654	1654	36	227	*[218];-g[8]	Other[1]	.	LEFT[ CDS:CAGL0L11638g:1243194-1245020 ];RIGHT[ CDS:CAGL0L11660g:1245685-1250064 ]	.	.	.	.	.
315	g	Cagl0L	1245308	*	*/-ac	208	208	36	205	*[203];-ac[1]	Other[1]	.	LEFT[ CDS:CAGL0L11638g:1243194-1245020 ];RIGHT[ CDS:CAGL0L11660g:1245685-1250064 ]	.	.	.	.	.
316	g	Cagl0L	1245309	*	*/-c	218	218	36	206	*[205];-c[1]	Other[0]	.	LEFT[ CDS:CAGL0L11638g:1243194-1245020 ];RIGHT[ CDS:CAGL0L11660g:1245685-1250064 ]	.	.	.	.	.
317	g	Cagl0L	1453920	*	-tcca/-tcca	23981	309340	36	7981	-tcca[3];-t[6]	Other[7972]	.	LEFT[ rRNA:CAGL0L13409r:1452956-1453076 ];RIGHT[ - ]	.	.	.	.	.
318	g	Cagl0L	1453922	*	-ca/-ca	23860	583130	36	7952	-ca[6];*[7946]	Other[0]	.	LEFT[ rRNA:CAGL0L13409r:1452956-1453076 ];RIGHT[ - ]	.	.	.	.	.
319	G	Cagl0L	1453922	c	Y	51	51	32	7952	Ref[437];A[0];T[185];G[0];C[437]	Gap[7330];-CA[6]	.	LEFT[ rRNA:CAGL0L13409r:1452956-1453076 ];RIGHT[ - ]	.	.	.	.	.
320	g	Cagl0L	1453924	*	-cc/-cc	23857	310942	36	7942	-cc[2];-c[1]	Other[7939]	.	LEFT[ rRNA:CAGL0L13409r:1452956-1453076 ];RIGHT[ - ]	.	.	.	.	.
321	G	Cagl0L	1453924	a	W	228	228	32	7942	Ref[322];A[322];T[286];G[0];C[0]	-CC[2];Gap[7334];-C[1];+ATC[75]	.	LEFT[ rRNA:CAGL0L13409r:1452956-1453076 ];RIGHT[ - ]	.	.	.	.	.
322	g	Cagl0L	1453928	*	-t/-t	1302	52670	36	7968	-t[1];*[7967]	Other[0]	.	LEFT[ rRNA:CAGL0L13409r:1452956-1453076 ];RIGHT[ - ]	.	.	.	.	.
323	G	Cagl0L	1455454	c	S	24	24	36	4455	Ref[3393];A[1];T[2];G[958];C[3393]	Gap[101]	.	LEFT[ rRNA:CAGL0L13409r:1452956-1453076 ];RIGHT[ - ]	.	.	.	.	.
324	g	Cagl0L	1455578	*	*/+CT	12787	12787	37	3410	*[3409];+CT[1]	Other[0]	.	LEFT[ rRNA:CAGL0L13409r:1452956-1453076 ];RIGHT[ - ]	.	.	.	.	.
325	g	Cagl0M	2636	*	*/-g	728	728	37	731	*[721];-g[10]	Other[0]	.	LEFT[ pseudogene:CAGL0M00110g:2-559 ];RIGHT[ CDS:CAGL0M00132g:11636-14404 ]	.	.	.	.	.
326	G	Cagl0L	1455459	g	S	228	228	36	5285	Ref[3356];A[1];T[0];G[3356];C[1928]	.	.	LEFT[ rRNA:CAGL0L13409r:1452956-1453076 ];RIGHT[ - ]	.	.	.	.	.
327	g	Cagl0M	2654	*	*/-c	223	223	37	738	*[737];-c[1]	Other[0]	.	LEFT[ pseudogene:CAGL0M00110g:2-559 ];RIGHT[ CDS:CAGL0M00132g:11636-14404 ]	.	.	.	.	.
328	g	Cagl0M	99381	*	*/-a	697	697	37	506	*[505];-a[1]	Other[0]	.	LEFT[ CDS:CAGL0M00880g:97304-98599 ];RIGHT[ CDS:CAGL0M00902g:99946-100296 ]	.	.	.	.	.
329	g	Cagl0M	99402	*	*/-c	643	643	37	521	*[520];-c[1]	Other[0]	.	LEFT[ CDS:CAGL0M00880g:97304-98599 ];RIGHT[ CDS:CAGL0M00902g:99946-100296 ]	.	.	.	.	.
330	g	Cagl0M	99404	*	*/-c	623	623	37	521	*[520];-c[1]	Other[0]	.	LEFT[ CDS:CAGL0M00880g:97304-98599 ];RIGHT[ CDS:CAGL0M00902g:99946-100296 ]	.	.	.	.	.
331	g	Cagl0M	146781	*	*/-g	978	978	36	257	*[246];-g[4]	Other[7]	.	LEFT[ CDS:CAGL0M01276g:144593-146641 ];RIGHT[ CDS:CAGL0M01298g:147015-148187 ]	.	.	.	.	.
332	g	Cagl0M	174183	*	*/-tt	3742	3742	37	436	*[435];-tt[1]	Other[0]	.	LEFT[ CDS:CAGL0M01496g:171045-173900 ];RIGHT[ CDS:CAGL0M01518g:174378-175595 ]	.	.	.	.	.
333	g	Cagl0M	174207	*	*/-tc	2503	2503	37	451	*[448];-tc[3]	Other[0]	.	LEFT[ CDS:CAGL0M01496g:171045-173900 ];RIGHT[ CDS:CAGL0M01518g:174378-175595 ]	.	.	.	.	.
334	g	Cagl0M	191727	*	*/-c	426	426	36	408	*[407];-c[1]	Other[0]	.	LEFT[ CDS:CAGL0M01694g:187841-190675 ];RIGHT[ CDS:CAGL0M01716g:192389-193696 ]	.	.	.	.	.
335	g	Cagl0M	191746	*	*/-t	656	656	36	394	*[390];-t[4]	Other[0]	.	LEFT[ CDS:CAGL0M01694g:187841-190675 ];RIGHT[ CDS:CAGL0M01716g:192389-193696 ]	.	.	.	.	.
336	g	Cagl0M	532574	*	*/-c	152	152	36	216	*[214];-c[2]	Other[0]	.	LEFT[ CDS:CAGL0M04851g:532127-532318 ];RIGHT[ CDS:CAGL0M04873g:532872-533189 ]	.	.	.	.	.
337	G	Cagl0M	393329	a	R	182	182	34	361	Ref[36];A[36];T[0];G[26];C[0]	Gap[299]	CDS	CAGL0M03465g	GL3R0082	CAG62473.1	-	(ohnolog of CAGL0L07766g), highly similar to uniprot|P25613 Saccharomyces cerevisiae YCR010c SPG2 or uniprot|P32907 Saccharomyces cerevisiae YNR002c FUN34	ohnolog=CAGL0L07766g;product=CAGL0M03465p;db_xref=PhylomeDB:CAGL0M03465g;db_xref=GOA:Q6FJU7;db_xref=InterPro:IPR000791;db_xref=UniProtKB/TrEMBL:Q6FJU7;
338	G	Cagl0M	393331	t	Y	228	228	34	363	Ref[30];A[0];T[30];G[0];C[34]	Gap[299]	CDS	CAGL0M03465g	GL3R0082	CAG62473.1	-	(ohnolog of CAGL0L07766g), highly similar to uniprot|P25613 Saccharomyces cerevisiae YCR010c SPG2 or uniprot|P32907 Saccharomyces cerevisiae YNR002c FUN34	ohnolog=CAGL0L07766g;product=CAGL0M03465p;db_xref=PhylomeDB:CAGL0M03465g;db_xref=GOA:Q6FJU7;db_xref=InterPro:IPR000791;db_xref=UniProtKB/TrEMBL:Q6FJU7;
339	g	Cagl0M	557830	*	*/-t	848	848	36	283	*[248];-t[25]	Other[10]	.	LEFT[ CDS:CAGL0M05159g:556347-557696 ];RIGHT[ CDS:CAGL0M05181g:558426-559691 ]	.	.	.	.	.
340	g	Cagl0M	742379	*	+C/+C	170	2042	37	235	+C[1];*[234]	Other[0]	.	LEFT[ CDS:CAGL0M07315g:740469-741557 ];RIGHT[ CDS:CAGL0M07337g:743020-743961 ]	.	.	.	.	.
341	g	Cagl0M	767473	*	*/-g	974	974	37	297	*[290];-g[2]	Other[5]	.	LEFT[ CDS:CAGL0M07656g:765772-767379 ];RIGHT[ CDS:CAGL0M07678g:767857-769278 ]	.	.	.	.	.
342	g	Cagl0M	845999	*	*/+C	49	49	36	93	*[91];+C[2]	Other[0]	.	LEFT[ tRNA:CAGL0M08470r:845650-845721 ];RIGHT[ CDS:CAGL0M08492g:848089-849096 ]	.	.	.	.	.
343	g	Cagl0M	860989	*	*/-a	333	333	35	82	*[77];-a[4]	Other[1]	.	LEFT[ CDS:CAGL0M08624g:859796-860809 ];RIGHT[ CDS:CAGL0M08646g:861488-862501 ]	.	.	.	.	.
344	g	Cagl0M	898989	*	*/-t	79	79	36	177	*[171];-t[6]	Other[0]	.	LEFT[ CDS:CAGL0M09020g:896312-897358 ];RIGHT[ CDS:CAGL0M09042g:901459-902817 ]	.	.	.	.	.
345	g	Cagl0M	899002	*	*/-a	68	68	36	174	*[163];-a[11]	Other[0]	.	LEFT[ CDS:CAGL0M09020g:896312-897358 ];RIGHT[ CDS:CAGL0M09042g:901459-902817 ]	.	.	.	.	.
346	g	Cagl0M	1208700	*	*/-a	43	43	36	199	*[192];-a[7]	Other[0]	.	LEFT[ CDS:CAGL0M12056g:1206666-1207001 ];RIGHT[ CDS:CAGL0M12100g:1209814-1210788 ]	.	.	.	.	.
347	G	Cagl0M	1245766	g	R	40	40	33	193	Ref[12];A[4];T[0];G[12];C[0]	Gap[177]	pseudogene	CAGL0M12496g	.	.	-	(ohnolog of CAGL0J03014g), similar to uniprot|P40522 Saccharomyces cerevisiae YIL056w frameshiftpseudogene	inference=similar to AA sequence:UniProtKB:P40522;
348	g	Cagl0M	1402436	*	*/-g	402	402	37	540	*[366];-g[174]	Other[0]	.	LEFT[ CDS:CAGL0M14113g:1397407-1399152 ];RIGHT[ - ]	.	.	.	.	.
349	g	Cagl0M	1402440	*	+C/+TC	2304	21266	35	1396	+C[174];+TC[10]	Other[1212]	.	LEFT[ CDS:CAGL0M14113g:1397407-1399152 ];RIGHT[ - ]	.	.	.	.	.
350	Q	Cagl0B	1966	c	Y	138	138	24	2071	Ref[1408];A[0];T[663];G[0];C[1408]	.	pseudogene	CAGL0B00110g	.	.	-	some similarities with uniprot|P08640 Saccharomyces cerevisiae YIR019c STA1 no start frameshiftpseudogene	.
351	Q	Cagl0B	500057	g	S	79	79	20	3157	Ref[2203];A[2];T[0];G[2203];C[952]	.	pseudogene	CAGL0B05093g	.	.	+	some similarities with uniprot|P47179 Saccharomyces cerevisiae YJR151c no start frameshiftpseudogene	.
352	Q	Cagl0B	500060	t	W	117	117	21	3552	Ref[2221];A[1322];T[2221];G[2];C[7]	.	pseudogene	CAGL0B05093g	.	.	+	some similarities with uniprot|P47179 Saccharomyces cerevisiae YJR151c no start frameshiftpseudogene	.
353	Q	Cagl0B	500114	a	M	79	79	23	7972	Ref[2286];A[2286];T[2];G[1];C[5683]	.	pseudogene	CAGL0B05093g	.	.	+	some similarities with uniprot|P47179 Saccharomyces cerevisiae YJR151c no start frameshiftpseudogene	.
354	Q	Cagl0B	500184	c	S	53	99	13	2241	Ref[897];A[0];T[1];G[1343];C[897]	.	pseudogene	CAGL0B05093g	.	.	+	some similarities with uniprot|P47179 Saccharomyces cerevisiae YJR151c no start frameshiftpseudogene	.
355	Q	Cagl0B	500486	c	A	70	224	17	703	Ref[429];A[263];T[0];G[11];C[429]	.	pseudogene	CAGL0B05093g	.	.	+	some similarities with uniprot|P47179 Saccharomyces cerevisiae YJR151c no start frameshiftpseudogene	.
356	Q	Cagl0B	501134	a	G	8	8	5	756	Ref[732];A[732];T[0];G[24];C[0]	.	pseudogene	CAGL0B05093g	.	.	+	some similarities with uniprot|P47179 Saccharomyces cerevisiae YJR151c no start frameshiftpseudogene	.
357	Q	Cagl0B	501136	c	T	12	12	7	724	Ref[690];A[0];T[34];G[0];C[690]	.	pseudogene	CAGL0B05093g	.	.	+	some similarities with uniprot|P47179 Saccharomyces cerevisiae YJR151c no start frameshiftpseudogene	.
358	Q	Cagl0B	501139	c	G	54	97	9	687	Ref[641];A[0];T[1];G[45];C[641]	.	pseudogene	CAGL0B05093g	.	.	+	some similarities with uniprot|P47179 Saccharomyces cerevisiae YJR151c no start frameshiftpseudogene	.
359	Q	Cagl0C	90262	c	T	13	146	13	490	Ref[235];A[0];T[255];G[0];C[235]	.	.	LEFT[ CDS:CAGL0C00847g:86130-88502 ];RIGHT[ gap::91153-91252 ]	.	.	.	.	.
360	Q	Cagl0C	90520	a	C	66	92	9	323	Ref[295];A[295];T[0];G[0];C[28]	.	.	LEFT[ CDS:CAGL0C00847g:86130-88502 ];RIGHT[ gap::91153-91252 ]	.	.	.	.	.
361	Q	Cagl0C	90731	g	A	148	225	23	588	Ref[166];A[422];T[0];G[166];C[0]	.	.	LEFT[ CDS:CAGL0C00847g:86130-88502 ];RIGHT[ gap::91153-91252 ]	.	.	.	.	.
362	Q	Cagl0C	103790	t	K	190	207	19	973	Ref[594];A[1];T[594];G[377];C[1]	.	.	LEFT[ gap::102374-102473 ];RIGHT[ pseudogene:CAGL0C01067g:104419-107905 ]	.	.	.	.	.
363	Q	Cagl0C	103806	*	*/-t	173	173	9	903	*[651];-t[252]	Other[0]	.	LEFT[ gap::102374-102473 ];RIGHT[ pseudogene:CAGL0C01067g:104419-107905 ]	.	.	.	.	.
364	Q	Cagl0C	105996	a	R	105	106	15	462	Ref[213];A[213];T[0];G[249];C[0]	.	pseudogene	CAGL0C01067g	.	.	+	some similarities with uniprot|P08640 Saccharomyces cerevisiae YIR019c STA1 no start frameshiftpseudogene	.
365	Q	Cagl0C	106015	g	R	125	125	19	297	Ref[126];A[171];T[0];G[126];C[0]	.	pseudogene	CAGL0C01067g	.	.	+	some similarities with uniprot|P08640 Saccharomyces cerevisiae YIR019c STA1 no start frameshiftpseudogene	.
366	Q	Cagl0C	106029	t	K	131	145	22	140	Ref[51];A[1];T[51];G[87];C[1]	.	pseudogene	CAGL0C01067g	.	.	+	some similarities with uniprot|P08640 Saccharomyces cerevisiae YIR019c STA1 no start frameshiftpseudogene	.
367	Q	Cagl0C	106032	c	S	152	158	22	104	Ref[43];A[0];T[0];G[61];C[43]	.	pseudogene	CAGL0C01067g	.	.	+	some similarities with uniprot|P08640 Saccharomyces cerevisiae YIR019c STA1 no start frameshiftpseudogene	.
368	Q	Cagl0C	106085	t	A	225	225	18	271	Ref[0];A[271];T[0];G[0];C[0]	.	pseudogene	CAGL0C01067g	.	.	+	some similarities with uniprot|P08640 Saccharomyces cerevisiae YIR019c STA1 no start frameshiftpseudogene	.
369	Q	Cagl0C	106325	a	C	6	6	0	134	Ref[3];A[3];T[0];G[0];C[131]	.	pseudogene	CAGL0C01067g	.	.	+	some similarities with uniprot|P08640 Saccharomyces cerevisiae YIR019c STA1 no start frameshiftpseudogene	.
370	Q	Cagl0C	106567	g	R	13	15	16	12	Ref[9];A[3];T[0];G[9];C[0]	.	pseudogene	CAGL0C01067g	.	.	+	some similarities with uniprot|P08640 Saccharomyces cerevisiae YIR019c STA1 no start frameshiftpseudogene	.
371	Q	Cagl0C	106568	g	S	15	103	18	25	Ref[11];A[0];T[0];G[11];C[14]	.	pseudogene	CAGL0C01067g	.	.	+	some similarities with uniprot|P08640 Saccharomyces cerevisiae YIR019c STA1 no start frameshiftpseudogene	.
372	Q	Cagl0C	106589	g	R	82	92	19	290	Ref[109];A[181];T[0];G[109];C[0]	.	pseudogene	CAGL0C01067g	.	.	+	some similarities with uniprot|P08640 Saccharomyces cerevisiae YIR019c STA1 no start frameshiftpseudogene	.
373	Q	Cagl0C	106603	t	K	60	82	19	443	Ref[162];A[0];T[162];G[281];C[0]	.	pseudogene	CAGL0C01067g	.	.	+	some similarities with uniprot|P08640 Saccharomyces cerevisiae YIR019c STA1 no start frameshiftpseudogene	.
374	Q	Cagl0C	106606	c	S	55	71	19	471	Ref[172];A[0];T[0];G[299];C[172]	.	pseudogene	CAGL0C01067g	.	.	+	some similarities with uniprot|P08640 Saccharomyces cerevisiae YIR019c STA1 no start frameshiftpseudogene	.
375	Q	Cagl0C	107004	c	S	120	120	23	856	Ref[629];A[0];T[1];G[226];C[629]	.	pseudogene	CAGL0C01067g	.	.	+	some similarities with uniprot|P08640 Saccharomyces cerevisiae YIR019c STA1 no start frameshiftpseudogene	.
376	Q	Cagl0C	107016	c	S	13	13	21	785	Ref[630];A[0];T[1];G[154];C[630]	.	pseudogene	CAGL0C01067g	.	.	+	some similarities with uniprot|P08640 Saccharomyces cerevisiae YIR019c STA1 no start frameshiftpseudogene	.
377	Q	Cagl0C	107028	c	G	17	17	17	738	Ref[620];A[0];T[0];G[118];C[620]	.	pseudogene	CAGL0C01067g	.	.	+	some similarities with uniprot|P08640 Saccharomyces cerevisiae YIR019c STA1 no start frameshiftpseudogene	.
378	Q	Cagl0C	107076	c	S	74	74	22	795	Ref[602];A[0];T[0];G[193];C[602]	.	pseudogene	CAGL0C01067g	.	.	+	some similarities with uniprot|P08640 Saccharomyces cerevisiae YIR019c STA1 no start frameshiftpseudogene	.
379	Q	Cagl0C	107801	t	A	42	98	18	15	Ref[0];A[15];T[0];G[0];C[0]	.	pseudogene	CAGL0C01067g	.	.	+	some similarities with uniprot|P08640 Saccharomyces cerevisiae YIR019c STA1 no start frameshiftpseudogene	.
380	Q	Cagl0C	113352	g	R	42	42	14	842	Ref[536];A[306];T[0];G[536];C[0]	.	.	LEFT[ pseudogene:CAGL0C01067g:104419-107905 ];RIGHT[ CDS:CAGL0C01133g:114805-117915 ]	.	.	.	.	.
381	Q	Cagl0C	113353	c	Y	58	58	13	836	Ref[533];A[0];T[303];G[0];C[533]	.	.	LEFT[ pseudogene:CAGL0C01067g:104419-107905 ];RIGHT[ CDS:CAGL0C01133g:114805-117915 ]	.	.	.	.	.
382	Q	Cagl0C	114191	*	*/-t	431	431	6	882	*[602];-t[280]	Other[0]	.	LEFT[ pseudogene:CAGL0C01067g:104419-107905 ];RIGHT[ CDS:CAGL0C01133g:114805-117915 ]	.	.	.	.	.
383	Q	Cagl0C	114521	t	K	33	33	24	631	Ref[497];A[0];T[497];G[134];C[0]	.	.	LEFT[ pseudogene:CAGL0C01067g:104419-107905 ];RIGHT[ CDS:CAGL0C01133g:114805-117915 ]	.	.	.	.	.
384	Q	Cagl0C	116797	c	G	10	10	12	2372	Ref[1738];A[3];T[0];G[631];C[1738]	.	CDS	CAGL0C01133g	GL3M4601	CAG58129.1	+	some similarities with uniprot|Q08294 Saccharomyces cerevisiae YOL155c	product=CAGL0C01133p;db_xref=UniProtKB/TrEMBL:Q6FX21;
385	Q	Cagl0C	116817	g	C	84	225	18	1674	Ref[655];A[1];T[1];G[655];C[1017]	.	CDS	CAGL0C01133g	GL3M4601	CAG58129.1	+	some similarities with uniprot|Q08294 Saccharomyces cerevisiae YOL155c	product=CAGL0C01133p;db_xref=UniProtKB/TrEMBL:Q6FX21;
386	Q	Cagl0D	2364	g	S	42	42	21	1276	Ref[901];A[0];T[0];G[901];C[375]	.	.	LEFT[ - ];RIGHT[ pseudogene:CAGL0D00110g:3088-5439 ]	.	.	.	.	.
387	Q	Cagl0D	650759	*	-a/-a	266	2999	3	76	-a[76];*[0]	Other[0]	pseudogene	CAGL0D06732g	.	.	+	some similarities with uniprot|P47179 Saccharomyces cerevisiae YJR151c no start frameshiftpseudogene	.
388	Q	Cagl0D	651020	t	A	123	193	23	45	Ref[0];A[45];T[0];G[0];C[0]	.	pseudogene	CAGL0D06732g	.	.	+	some similarities with uniprot|P47179 Saccharomyces cerevisiae YJR151c no start frameshiftpseudogene	.
389	Q	Cagl0E	2207	g	T	166	211	22	56	Ref[0];A[0];T[56];G[0];C[0]	.	pseudogene	CAGL0E00110g	.	.	-	some similarities with uniprot|P40442 Saccharomyces cerevisiae YIL169c frameshiftpseudogene	.
390	Q	Cagl0E	3077	g	C	132	161	14	1267	Ref[1044];A[1];T[0];G[1044];C[222]	.	pseudogene	CAGL0E00110g	.	.	-	some similarities with uniprot|P40442 Saccharomyces cerevisiae YIL169c frameshiftpseudogene	.
391	Q	Cagl0G	3900	t	C	93	105	13	34	Ref[0];A[0];T[0];G[0];C[34]	.	pseudogene	CAGL0G00110g	.	.	-	no similarity frameshiftpseudogene	.
392	Q	Cagl0G	4360	a	M	25	94	24	15	Ref[2];A[2];T[0];G[0];C[13]	-T[2]	pseudogene	CAGL0G00110g	.	.	-	no similarity frameshiftpseudogene	.
393	Q	Cagl0G	990930	t	Y	132	132	22	1122	Ref[650];A[0];T[650];G[0];C[472]	.	CDS	CAGL0G10219g	GL3M4601	CAG59732.1	+	some similarities with uniprot|P38894 Saccharomyces cerevisiae YHR211w FLO5	product=CAGL0G10219p;db_xref=UniProtKB/TrEMBL:Q6FSI9;
394	Q	Cagl0H	5197	a	G	6	38	24	3	Ref[0];A[0];T[0];G[3];C[0]	.	pseudogene	CAGL0H00132g	.	.	-	some similarities with uniprot|P08640 Saccharomyces cerevisiae YIR019c STA1 no start frameshiftpseudogene	.
395	Q	Cagl0H	5203	g	S	11	11	21	4	Ref[2];A[0];T[0];G[2];C[2]	.	pseudogene	CAGL0H00132g	.	.	-	some similarities with uniprot|P08640 Saccharomyces cerevisiae YIR019c STA1 no start frameshiftpseudogene	.
396	Q	Cagl0J	169128	a	G	81	84	10	258	Ref[231];A[231];T[0];G[27];C[0]	.	CDS	CAGL0J01774g	GL3C3673	CAR58040.1	-	no similarity	product=CAGL0J01774p;db_xref=UniProtKB/TrEMBL:B4UN24;
397	Q	Cagl0J	490518	a	T	42	46	7	5665	Ref[5323];A[5323];T[338];G[2];C[2]	.	CDS	CAGL0J05159g	GL3C4721	CAR58044.1	-	no similarity	product=CAGL0J05159p;db_xref=UniProtKB/TrEMBL:B4UN28;
398	Q	Cagl0J	1164066	g	R	161	161	21	1305	Ref[818];A[487];T[0];G[818];C[0]	.	CDS	CAGL0J11891g	.	CAR58048.1	-	no similarity	product=CAGL0J11891p;db_xref=UniProtKB/TrEMBL:B4UN32;
399	Q	Cagl0J	1188719	a	C	36	126	20	13	Ref[0];A[0];T[0];G[0];C[13]	.	pseudogene	CAGL0J11990g	.	.	+	some similarities with uniprot|P38739 Saccharomyces cerevisiae YHL028w WSC4 no start frameshiftpseudogene	.
400	Q	Cagl0J	1190327	a	G	20	20	0	57	Ref[0];A[0];T[0];G[57];C[0]	.	pseudogene	CAGL0J11990g	.	.	+	some similarities with uniprot|P38739 Saccharomyces cerevisiae YHL028w WSC4 no start frameshiftpseudogene	.
401	Q	Cagl0J	1190786	*	-a/-a	120	79	9	55	-a[3];*[52]	Other[0]	pseudogene	CAGL0J11990g	.	.	+	some similarities with uniprot|P38739 Saccharomyces cerevisiae YHL028w WSC4 no start frameshiftpseudogene	.
402	Q	Cagl0J	1191154	g	M	12	12	15	7	Ref[0];A[5];T[0];G[0];C[2]	.	pseudogene	CAGL0J11990g	.	.	+	some similarities with uniprot|P38739 Saccharomyces cerevisiae YHL028w WSC4 no start frameshiftpseudogene	.
403	Q	Cagl0K	907	a	R	34	34	18	2896	Ref[2173];A[2173];T[0];G[723];C[0]	.	.	LEFT[ - ];RIGHT[ CDS:CAGL0K00110g:3332-5830 ]	.	.	.	.	.
404	Q	Cagl0K	928	g	R	228	228	24	3378	Ref[1860];A[1458];T[0];G[1860];C[59]	Gap[1]	.	LEFT[ - ];RIGHT[ CDS:CAGL0K00110g:3332-5830 ]	.	.	.	.	.
405	Q	Cagl0K	2168	a	R	6	6	22	2607	Ref[1881];A[1881];T[0];G[726];C[0]	.	.	LEFT[ - ];RIGHT[ CDS:CAGL0K00110g:3332-5830 ]	.	.	.	.	.
406	Q	Cagl0L	4582	a	R	143	143	15	1238	Ref[786];A[786];T[0];G[452];C[0]	.	CDS	CAGL0L00157g	GL3M4601	CAR58057.1	-	no similarity	product=CAGL0L00157p;db_xref=UniProtKB/TrEMBL:B4UN41;
407	W	Cagl0A	1423	a	W	121	121	33	1175	Ref[841];A[841];T[334];G[0];C[0]	.	.	LEFT[ - ];RIGHT[ CDS:CAGL0A00165g:18037-18876 ]	.	.	.	.	.
408	W	Cagl0A	1429	a	W	45	45	34	1208	Ref[874];A[874];T[333];G[0];C[0]	Gap[1]	.	LEFT[ - ];RIGHT[ CDS:CAGL0A00165g:18037-18876 ]	.	.	.	.	.
409	W	Cagl0A	1430	t	W	56	56	34	1221	Ref[879];A[342];T[879];G[0];C[0]	.	.	LEFT[ - ];RIGHT[ CDS:CAGL0A00165g:18037-18876 ]	.	.	.	.	.
410	W	Cagl0A	3649	a	R	228	228	35	1239	Ref[770];A[770];T[0];G[469];C[0]	.	.	LEFT[ - ];RIGHT[ CDS:CAGL0A00165g:18037-18876 ]	.	.	.	.	.
411	W	Cagl0A	3655	a	M	228	228	36	1179	Ref[753];A[753];T[3];G[0];C[423]	.	.	LEFT[ - ];RIGHT[ CDS:CAGL0A00165g:18037-18876 ]	.	.	.	.	.
412	W	Cagl0A	3658	c	M	28	28	36	1033	Ref[762];A[266];T[0];G[5];C[762]	.	.	LEFT[ - ];RIGHT[ CDS:CAGL0A00165g:18037-18876 ]	.	.	.	.	.
413	W	Cagl0A	3659	t	K	59	59	36	1011	Ref[771];A[0];T[771];G[239];C[1]	.	.	LEFT[ - ];RIGHT[ CDS:CAGL0A00165g:18037-18876 ]	.	.	.	.	.
414	W	Cagl0A	10283	c	Y	185	185	32	1794	Ref[976];A[0];T[818];G[0];C[976]	.	.	LEFT[ - ];RIGHT[ CDS:CAGL0A00165g:18037-18876 ]	.	.	.	.	.
415	W	Cagl0A	10288	g	K	228	228	33	2295	Ref[926];A[2];T[1367];G[926];C[0]	.	.	LEFT[ - ];RIGHT[ CDS:CAGL0A00165g:18037-18876 ]	.	.	.	.	.
416	W	Cagl0A	10293	g	R	228	228	34	3131	Ref[919];A[2212];T[0];G[919];C[0]	.	.	LEFT[ - ];RIGHT[ CDS:CAGL0A00165g:18037-18876 ]	.	.	.	.	.
417	W	Cagl0A	10414	t	K	228	228	36	1590	Ref[900];A[0];T[900];G[645];C[0]	Gap[45]	.	LEFT[ - ];RIGHT[ CDS:CAGL0A00165g:18037-18876 ]	.	.	.	.	.
418	W	Cagl0B	2537	t	G	9	80	37	4	Ref[0];A[0];T[0];G[4];C[0]	.	pseudogene	CAGL0B00110g	.	.	-	some similarities with uniprot|P08640 Saccharomyces cerevisiae YIR019c STA1 no start frameshiftpseudogene	.
419	W	Cagl0B	2539	g	T	27	186	37	10	Ref[0];A[0];T[10];G[0];C[0]	.	pseudogene	CAGL0B00110g	.	.	-	some similarities with uniprot|P08640 Saccharomyces cerevisiae YIR019c STA1 no start frameshiftpseudogene	.
420	W	Cagl0B	2540	a	G	225	225	37	178	Ref[0];A[0];T[0];G[178];C[0]	.	pseudogene	CAGL0B00110g	.	.	-	some similarities with uniprot|P08640 Saccharomyces cerevisiae YIR019c STA1 no start frameshiftpseudogene	.
421	W	Cagl0B	2541	t	G	225	225	37	269	Ref[0];A[0];T[0];G[269];C[0]	.	pseudogene	CAGL0B00110g	.	.	-	some similarities with uniprot|P08640 Saccharomyces cerevisiae YIR019c STA1 no start frameshiftpseudogene	.
422	W	Cagl0B	3402	t	Y	38	38	36	88	Ref[74];A[0];T[74];G[0];C[14]	.	pseudogene	CAGL0B00110g	.	.	-	some similarities with uniprot|P08640 Saccharomyces cerevisiae YIR019c STA1 no start frameshiftpseudogene	.
423	W	Cagl0B	3403	c	Y	162	162	36	103	Ref[74];A[0];T[29];G[0];C[74]	-T[74]	pseudogene	CAGL0B00110g	.	.	-	some similarities with uniprot|P08640 Saccharomyces cerevisiae YIR019c STA1 no start frameshiftpseudogene	.
424	W	Cagl0B	3404	t	C	102	225	37	110	Ref[0];A[0];T[0];G[0];C[36]	Gap[74]	pseudogene	CAGL0B00110g	.	.	-	some similarities with uniprot|P08640 Saccharomyces cerevisiae YIR019c STA1 no start frameshiftpseudogene	.
425	W	Cagl0B	499019	a	M	71	71	36	130	Ref[102];A[102];T[0];G[0];C[28]	-T[102]	pseudogene	CAGL0B05093g	.	.	+	some similarities with uniprot|P47179 Saccharomyces cerevisiae YJR151c no start frameshiftpseudogene	.
426	W	Cagl0B	499020	t	C	60	225	28	123	Ref[0];A[0];T[0];G[0];C[21]	Gap[102]	pseudogene	CAGL0B05093g	.	.	+	some similarities with uniprot|P47179 Saccharomyces cerevisiae YJR151c no start frameshiftpseudogene	.
427	W	Cagl0B	499267	t	C	160	225	37	54	Ref[0];A[0];T[0];G[0];C[54]	.	pseudogene	CAGL0B05093g	.	.	+	some similarities with uniprot|P47179 Saccharomyces cerevisiae YJR151c no start frameshiftpseudogene	.
428	W	Cagl0B	499277	g	C	123	225	37	128	Ref[0];A[0];T[0];G[0];C[42]	Gap[86]	pseudogene	CAGL0B05093g	.	.	+	some similarities with uniprot|P47179 Saccharomyces cerevisiae YJR151c no start frameshiftpseudogene	.
429	W	Cagl0C	85421	a	R	228	228	36	989	Ref[642];A[642];T[0];G[347];C[0]	.	.	LEFT[ CDS:CAGL0C00781g:81411-82193 ];RIGHT[ CDS:CAGL0C00847g:86130-88502 ]	.	.	.	.	.
430	W	Cagl0C	85424	g	K	224	224	36	970	Ref[632];A[0];T[338];G[632];C[0]	.	.	LEFT[ CDS:CAGL0C00781g:81411-82193 ];RIGHT[ CDS:CAGL0C00847g:86130-88502 ]	.	.	.	.	.
431	W	Cagl0C	85430	g	R	228	228	36	903	Ref[612];A[291];T[0];G[612];C[0]	.	.	LEFT[ CDS:CAGL0C00781g:81411-82193 ];RIGHT[ CDS:CAGL0C00847g:86130-88502 ]	.	.	.	.	.
432	W	Cagl0C	90105	t	C	225	225	25	870	Ref[104];A[0];T[104];G[0];C[766]	.	.	LEFT[ CDS:CAGL0C00847g:86130-88502 ];RIGHT[ gap::91153-91252 ]	.	.	.	.	.
433	W	Cagl0C	90106	c	A	225	225	26	877	Ref[104];A[773];T[0];G[0];C[104]	.	.	LEFT[ CDS:CAGL0C00847g:86130-88502 ];RIGHT[ gap::91153-91252 ]	.	.	.	.	.
434	W	Cagl0C	90112	g	A	225	225	27	877	Ref[92];A[784];T[0];G[92];C[0]	Gap[1]	.	LEFT[ CDS:CAGL0C00847g:86130-88502 ];RIGHT[ gap::91153-91252 ]	.	.	.	.	.
435	W	Cagl0C	93333	c	Y	26	26	32	566	Ref[468];A[0];T[98];G[0];C[468]	.	.	LEFT[ gap::91153-91252 ];RIGHT[ CDS:CAGL0C00968g:96914-100018 ]	.	.	.	.	.
436	W	Cagl0C	93334	c	Y	6	6	32	564	Ref[466];A[0];T[98];G[0];C[466]	.	.	LEFT[ gap::91153-91252 ];RIGHT[ CDS:CAGL0C00968g:96914-100018 ]	.	.	.	.	.
437	W	Cagl0C	93336	c	S	38	38	32	559	Ref[461];A[0];T[0];G[98];C[461]	.	.	LEFT[ gap::91153-91252 ];RIGHT[ CDS:CAGL0C00968g:96914-100018 ]	.	.	.	.	.
438	W	Cagl0C	94576	a	M	228	228	36	986	Ref[500];A[500];T[0];G[0];C[486]	.	.	LEFT[ gap::91153-91252 ];RIGHT[ CDS:CAGL0C00968g:96914-100018 ]	.	.	.	.	.
439	W	Cagl0C	94582	t	K	228	228	36	979	Ref[490];A[0];T[490];G[489];C[0]	.	.	LEFT[ gap::91153-91252 ];RIGHT[ CDS:CAGL0C00968g:96914-100018 ]	.	.	.	.	.
440	W	Cagl0C	94583	a	W	228	228	36	974	Ref[484];A[484];T[490];G[0];C[0]	.	.	LEFT[ gap::91153-91252 ];RIGHT[ CDS:CAGL0C00968g:96914-100018 ]	.	.	.	.	.
441	W	Cagl0C	94586	g	R	228	228	36	980	Ref[476];A[504];T[0];G[476];C[0]	.	.	LEFT[ gap::91153-91252 ];RIGHT[ CDS:CAGL0C00968g:96914-100018 ]	.	.	.	.	.
442	W	Cagl0C	97112	t	W	228	228	33	1116	Ref[602];A[514];T[602];G[0];C[0]	.	CDS	CAGL0C00968g	GL3M4601	CAG58125.1	+	some similarities with uniprot|Q08294 Saccharomyces cerevisiae YOL155c	product=CAGL0C00968p;db_xref=UniProtKB/TrEMBL:Q6FX23;
443	W	Cagl0C	97117	c	S	228	228	33	1120	Ref[603];A[0];T[0];G[517];C[603]	.	CDS	CAGL0C00968g	GL3M4601	CAG58125.1	+	some similarities with uniprot|Q08294 Saccharomyces cerevisiae YOL155c	product=CAGL0C00968p;db_xref=UniProtKB/TrEMBL:Q6FX23;
444	W	Cagl0C	97119	t	W	228	228	33	1120	Ref[603];A[517];T[603];G[0];C[0]	.	CDS	CAGL0C00968g	GL3M4601	CAG58125.1	+	some similarities with uniprot|Q08294 Saccharomyces cerevisiae YOL155c	product=CAGL0C00968p;db_xref=UniProtKB/TrEMBL:Q6FX23;
445	W	Cagl0C	97123	t	Y	228	228	33	1125	Ref[606];A[0];T[606];G[0];C[519]	.	CDS	CAGL0C00968g	GL3M4601	CAG58125.1	+	some similarities with uniprot|Q08294 Saccharomyces cerevisiae YOL155c	product=CAGL0C00968p;db_xref=UniProtKB/TrEMBL:Q6FX23;
446	W	Cagl0C	100106	a	R	21	21	34	52	Ref[45];A[45];T[0];G[7];C[0]	.	.	LEFT[ CDS:CAGL0C00968g:96914-100018 ];RIGHT[ gap::102374-102473 ]	.	.	.	.	.
447	W	Cagl0C	100107	t	W	136	136	34	59	Ref[45];A[14];T[45];G[0];C[0]	.	.	LEFT[ CDS:CAGL0C00968g:96914-100018 ];RIGHT[ gap::102374-102473 ]	.	.	.	.	.
448	W	Cagl0C	100110	a	T	102	225	33	80	Ref[0];A[0];T[35];G[0];C[0]	Gap[45]	.	LEFT[ CDS:CAGL0C00968g:96914-100018 ];RIGHT[ gap::102374-102473 ]	.	.	.	.	.
449	W	Cagl0C	100116	g	R	228	228	34	143	Ref[74];A[69];T[0];G[74];C[0]	.	.	LEFT[ CDS:CAGL0C00968g:96914-100018 ];RIGHT[ gap::102374-102473 ]	.	.	.	.	.
450	W	Cagl0C	100261	t	A	141	225	37	48	Ref[0];A[48];T[0];G[0];C[0]	.	.	LEFT[ CDS:CAGL0C00968g:96914-100018 ];RIGHT[ gap::102374-102473 ]	.	.	.	.	.
451	W	Cagl0C	100262	c	G	102	225	37	35	Ref[0];A[0];T[0];G[35];C[0]	.	.	LEFT[ CDS:CAGL0C00968g:96914-100018 ];RIGHT[ gap::102374-102473 ]	.	.	.	.	.
452	W	Cagl0C	100263	g	A	45	213	37	16	Ref[0];A[16];T[0];G[0];C[0]	.	.	LEFT[ CDS:CAGL0C00968g:96914-100018 ];RIGHT[ gap::102374-102473 ]	.	.	.	.	.
453	W	Cagl0C	100264	t	A	27	131	37	10	Ref[0];A[10];T[0];G[0];C[0]	.	.	LEFT[ CDS:CAGL0C00968g:96914-100018 ];RIGHT[ gap::102374-102473 ]	.	.	.	.	.
454	W	Cagl0C	108116	t	Y	214	228	37	85	Ref[23];A[0];T[23];G[0];C[62]	.	.	LEFT[ pseudogene:CAGL0C01067g:104419-107905 ];RIGHT[ CDS:CAGL0C01133g:114805-117915 ]	.	.	.	.	.
455	W	Cagl0C	108117	a	M	217	217	37	70	Ref[47];A[47];T[0];G[0];C[23]	.	.	LEFT[ pseudogene:CAGL0C01067g:104419-107905 ];RIGHT[ CDS:CAGL0C01133g:114805-117915 ]	.	.	.	.	.
456	W	Cagl0C	108118	a	W	228	228	37	64	Ref[23];A[23];T[41];G[0];C[0]	.	.	LEFT[ pseudogene:CAGL0C01067g:104419-107905 ];RIGHT[ CDS:CAGL0C01133g:114805-117915 ]	.	.	.	.	.
457	W	Cagl0C	108120	t	K	184	184	37	37	Ref[23];A[0];T[23];G[14];C[0]	.	.	LEFT[ pseudogene:CAGL0C01067g:104419-107905 ];RIGHT[ CDS:CAGL0C01133g:114805-117915 ]	.	.	.	.	.
458	W	Cagl0C	108135	t	R	225	225	37	102	Ref[0];A[31];T[0];G[37];C[0]	Gap[34]	.	LEFT[ pseudogene:CAGL0C01067g:104419-107905 ];RIGHT[ CDS:CAGL0C01133g:114805-117915 ]	.	.	.	.	.
459	W	Cagl0C	110781	c	M	94	94	35	1851	Ref[1398];A[453];T[0];G[0];C[1398]	.	.	LEFT[ pseudogene:CAGL0C01067g:104419-107905 ];RIGHT[ CDS:CAGL0C01133g:114805-117915 ]	.	.	.	.	.
460	W	Cagl0C	110785	c	M	46	46	35	1816	Ref[1387];A[429];T[0];G[0];C[1387]	.	.	LEFT[ pseudogene:CAGL0C01067g:104419-107905 ];RIGHT[ CDS:CAGL0C01133g:114805-117915 ]	.	.	.	.	.
461	W	Cagl0C	110787	g	R	10	10	35	1788	Ref[1374];A[414];T[0];G[1374];C[0]	.	.	LEFT[ pseudogene:CAGL0C01067g:104419-107905 ];RIGHT[ CDS:CAGL0C01133g:114805-117915 ]	.	.	.	.	.
462	W	Cagl0C	112014	c	S	228	228	37	1360	Ref[624];A[0];T[0];G[736];C[624]	.	.	LEFT[ pseudogene:CAGL0C01067g:104419-107905 ];RIGHT[ CDS:CAGL0C01133g:114805-117915 ]	.	.	.	.	.
463	W	Cagl0C	112016	a	W	228	228	37	1373	Ref[622];A[622];T[750];G[0];C[1]	.	.	LEFT[ pseudogene:CAGL0C01067g:104419-107905 ];RIGHT[ CDS:CAGL0C01133g:114805-117915 ]	.	.	.	.	.
464	W	Cagl0C	112019	t	Y	228	228	37	1386	Ref[619];A[0];T[619];G[0];C[767]	.	.	LEFT[ pseudogene:CAGL0C01067g:104419-107905 ];RIGHT[ CDS:CAGL0C01133g:114805-117915 ]	.	.	.	.	.
465	W	Cagl0C	112157	t	K	228	228	37	1653	Ref[559];A[0];T[559];G[1094];C[0]	.	.	LEFT[ pseudogene:CAGL0C01067g:104419-107905 ];RIGHT[ CDS:CAGL0C01133g:114805-117915 ]	.	.	.	.	.
466	W	Cagl0C	112160	g	R	228	228	37	1653	Ref[560];A[1093];T[0];G[560];C[0]	.	.	LEFT[ pseudogene:CAGL0C01067g:104419-107905 ];RIGHT[ CDS:CAGL0C01133g:114805-117915 ]	.	.	.	.	.
467	W	Cagl0C	112163	c	Y	228	228	37	1646	Ref[561];A[0];T[1085];G[0];C[561]	.	.	LEFT[ pseudogene:CAGL0C01067g:104419-107905 ];RIGHT[ CDS:CAGL0C01133g:114805-117915 ]	.	.	.	.	.
468	W	Cagl0D	652	a	R	1	1	33	1396	Ref[1049];A[1049];T[0];G[347];C[0]	.	.	LEFT[ - ];RIGHT[ pseudogene:CAGL0D00110g:3088-5439 ]	.	.	.	.	.
469	W	Cagl0D	655	g	R	83	83	33	1432	Ref[984];A[447];T[1];G[984];C[0]	.	.	LEFT[ - ];RIGHT[ pseudogene:CAGL0D00110g:3088-5439 ]	.	.	.	.	.
470	W	Cagl0D	661	t	K	68	68	32	1497	Ref[1058];A[0];T[1058];G[439];C[0]	.	.	LEFT[ - ];RIGHT[ pseudogene:CAGL0D00110g:3088-5439 ]	.	.	.	.	.
471	W	Cagl0D	1492	c	S	9	9	32	1443	Ref[1062];A[0];T[1];G[380];C[1062]	.	.	LEFT[ - ];RIGHT[ pseudogene:CAGL0D00110g:3088-5439 ]	.	.	.	.	.
472	W	Cagl0D	1493	c	Y	9	9	32	1449	Ref[1068];A[0];T[381];G[0];C[1068]	.	.	LEFT[ - ];RIGHT[ pseudogene:CAGL0D00110g:3088-5439 ]	.	.	.	.	.
473	W	Cagl0D	1494	t	W	24	24	32	1443	Ref[1063];A[380];T[1063];G[0];C[0]	.	.	LEFT[ - ];RIGHT[ pseudogene:CAGL0D00110g:3088-5439 ]	.	.	.	.	.
474	W	Cagl0D	3538	c	G	184	225	31	62	Ref[0];A[0];T[0];G[62];C[0]	.	pseudogene	CAGL0D00110g	.	.	-	some similarities with uniprot|P40442 Saccharomyces cerevisiae YIL169c frameshiftpseudogene	.
475	W	Cagl0D	3539	g	T	160	225	30	54	Ref[0];A[0];T[54];G[0];C[0]	.	pseudogene	CAGL0D00110g	.	.	-	some similarities with uniprot|P40442 Saccharomyces cerevisiae YIL169c frameshiftpseudogene	.
476	W	Cagl0D	3542	t	G	33	189	31	12	Ref[0];A[0];T[0];G[12];C[0]	.	pseudogene	CAGL0D00110g	.	.	-	some similarities with uniprot|P40442 Saccharomyces cerevisiae YIL169c frameshiftpseudogene	.
477	W	Cagl0D	3543	g	A	15	70	23	6	Ref[0];A[6];T[0];G[0];C[0]	.	pseudogene	CAGL0D00110g	.	.	-	some similarities with uniprot|P40442 Saccharomyces cerevisiae YIL169c frameshiftpseudogene	.
478	W	Cagl0D	3617	c	T	39	225	37	14	Ref[0];A[0];T[14];G[0];C[0]	.	pseudogene	CAGL0D00110g	.	.	-	some similarities with uniprot|P40442 Saccharomyces cerevisiae YIL169c frameshiftpseudogene	.
479	W	Cagl0D	3618	a	G	66	225	37	23	Ref[0];A[0];T[0];G[23];C[0]	.	pseudogene	CAGL0D00110g	.	.	-	some similarities with uniprot|P40442 Saccharomyces cerevisiae YIL169c frameshiftpseudogene	.
480	W	Cagl0D	3621	t	G	157	225	37	53	Ref[0];A[0];T[0];G[53];C[0]	.	pseudogene	CAGL0D00110g	.	.	-	some similarities with uniprot|P40442 Saccharomyces cerevisiae YIL169c frameshiftpseudogene	.
481	W	Cagl0D	3927	t	Y	176	176	35	302	Ref[216];A[0];T[216];G[2];C[84]	.	pseudogene	CAGL0D00110g	.	.	-	some similarities with uniprot|P40442 Saccharomyces cerevisiae YIL169c frameshiftpseudogene	.
482	W	Cagl0D	3934	a	R	127	228	36	344	Ref[84];A[84];T[0];G[260];C[0]	.	pseudogene	CAGL0D00110g	.	.	-	some similarities with uniprot|P40442 Saccharomyces cerevisiae YIL169c frameshiftpseudogene	.
483	W	Cagl0D	3937	c	S	103	228	36	355	Ref[74];A[0];T[0];G[281];C[74]	.	pseudogene	CAGL0D00110g	.	.	-	some similarities with uniprot|P40442 Saccharomyces cerevisiae YIL169c frameshiftpseudogene	.
484	W	Cagl0D	3942	c	M	228	228	33	343	Ref[31];A[52];T[7];G[0];C[31]	Gap[253];-T[1]	pseudogene	CAGL0D00110g	.	.	-	some similarities with uniprot|P40442 Saccharomyces cerevisiae YIL169c frameshiftpseudogene	.
485	W	Cagl0D	4032	t	Y	128	128	36	867	Ref[631];A[0];T[631];G[0];C[236]	.	pseudogene	CAGL0D00110g	.	.	-	some similarities with uniprot|P40442 Saccharomyces cerevisiae YIL169c frameshiftpseudogene	.
486	W	Cagl0D	4034	c	M	129	129	36	856	Ref[630];A[226];T[0];G[0];C[630]	.	pseudogene	CAGL0D00110g	.	.	-	some similarities with uniprot|P40442 Saccharomyces cerevisiae YIL169c frameshiftpseudogene	.
487	W	Cagl0D	4038	t	Y	154	154	36	845	Ref[635];A[0];T[635];G[0];C[210]	.	pseudogene	CAGL0D00110g	.	.	-	some similarities with uniprot|P40442 Saccharomyces cerevisiae YIL169c frameshiftpseudogene	.
488	W	Cagl0D	4602	t	A	42	225	37	15	Ref[0];A[15];T[0];G[0];C[0]	.	pseudogene	CAGL0D00110g	.	.	-	some similarities with uniprot|P40442 Saccharomyces cerevisiae YIL169c frameshiftpseudogene	.
489	W	Cagl0D	651158	a	T	225	225	33	192	Ref[0];A[0];T[190];G[1];C[1]	.	pseudogene	CAGL0D06732g	.	.	+	some similarities with uniprot|P47179 Saccharomyces cerevisiae YJR151c no start frameshiftpseudogene	.
490	W	Cagl0D	651159	t	G	225	225	32	203	Ref[0];A[0];T[0];G[203];C[0]	.	pseudogene	CAGL0D06732g	.	.	+	some similarities with uniprot|P47179 Saccharomyces cerevisiae YJR151c no start frameshiftpseudogene	.
491	W	Cagl0D	651165	c	S	29	29	29	198	Ref[144];A[0];T[0];G[54];C[144]	-G[79]	pseudogene	CAGL0D06732g	.	.	+	some similarities with uniprot|P47179 Saccharomyces cerevisiae YJR151c no start frameshiftpseudogene	.
492	W	Cagl0D	651166	g	S	204	228	32	184	Ref[34];A[0];T[0];G[34];C[71]	Gap[79]	pseudogene	CAGL0D06732g	.	.	+	some similarities with uniprot|P47179 Saccharomyces cerevisiae YJR151c no start frameshiftpseudogene	.
493	W	Cagl0E	2397	g	K	14	14	34	133	Ref[110];A[1];T[22];G[110];C[0]	.	pseudogene	CAGL0E00110g	.	.	-	some similarities with uniprot|P40442 Saccharomyces cerevisiae YIL169c frameshiftpseudogene	.
494	W	Cagl0E	464054	a	W	228	228	32	1866	Ref[642];A[642];T[1224];G[0];C[0]	-T[9]	.	LEFT[ CDS:CAGL0E04818g:462438-463712 ];RIGHT[ CDS:CAGL0E04840g:464344-465546 ]	.	.	.	.	.
495	W	Cagl0E	464055	t	W	228	228	33	2030	Ref[635];A[1386];T[635];G[0];C[0]	Gap[9];+A[2]	.	LEFT[ CDS:CAGL0E04818g:462438-463712 ];RIGHT[ CDS:CAGL0E04840g:464344-465546 ]	.	.	.	.	.
496	W	Cagl0E	464154	t	W	228	228	36	1479	Ref[583];A[805];T[583];G[0];C[0]	Gap[91]	.	LEFT[ CDS:CAGL0E04818g:462438-463712 ];RIGHT[ CDS:CAGL0E04840g:464344-465546 ]	.	.	.	.	.
497	W	Cagl0E	464155	g	R	228	228	35	1298	Ref[538];A[669];T[0];G[538];C[0]	Gap[91]	.	LEFT[ CDS:CAGL0E04818g:462438-463712 ];RIGHT[ CDS:CAGL0E04840g:464344-465546 ]	.	.	.	.	.
498	W	Cagl0E	464157	t	W	120	120	35	975	Ref[576];A[308];T[576];G[0];C[0]	Gap[91]	.	LEFT[ CDS:CAGL0E04818g:462438-463712 ];RIGHT[ CDS:CAGL0E04840g:464344-465546 ]	.	.	.	.	.
499	W	Cagl0F	350	c	Y	228	228	35	1490	Ref[925];A[0];T[565];G[0];C[925]	.	.	LEFT[ - ];RIGHT[ pseudogene:CAGL0F00110g:1241-4796 ]	.	.	.	.	.
500	W	Cagl0F	352	c	Y	227	227	35	1482	Ref[934];A[0];T[548];G[0];C[934]	.	.	LEFT[ - ];RIGHT[ pseudogene:CAGL0F00110g:1241-4796 ]	.	.	.	.	.
501	W	Cagl0F	354	c	Y	203	203	35	1478	Ref[944];A[1];T[533];G[0];C[944]	.	.	LEFT[ - ];RIGHT[ pseudogene:CAGL0F00110g:1241-4796 ]	.	.	.	.	.
502	W	Cagl0F	362	c	S	228	228	35	1454	Ref[918];A[0];T[0];G[536];C[918]	.	.	LEFT[ - ];RIGHT[ pseudogene:CAGL0F00110g:1241-4796 ]	.	.	.	.	.
503	W	Cagl0F	2387	g	R	136	136	35	749	Ref[500];A[244];T[2];G[500];C[3]	.	pseudogene	CAGL0F00110g	.	.	-	no similaritypseudogene	.
504	W	Cagl0F	2388	t	Y	210	210	35	799	Ref[498];A[1];T[498];G[0];C[300]	.	pseudogene	CAGL0F00110g	.	.	-	no similaritypseudogene	.
505	W	Cagl0F	2389	c	S	203	203	35	866	Ref[497];A[0];T[1];G[368];C[497]	+G[1]	pseudogene	CAGL0F00110g	.	.	-	no similaritypseudogene	.
506	W	Cagl0F	2502	t	C	225	225	36	1199	Ref[7];A[2];T[7];G[3];C[1187]	.	pseudogene	CAGL0F00110g	.	.	-	no similaritypseudogene	.
507	W	Cagl0F	2509	a	T	225	225	36	696	Ref[3];A[3];T[690];G[3];C[0]	.	pseudogene	CAGL0F00110g	.	.	-	no similaritypseudogene	.
508	W	Cagl0F	2512	c	G	225	225	35	378	Ref[4];A[0];T[0];G[374];C[4]	-A[3]	pseudogene	CAGL0F00110g	.	.	-	no similaritypseudogene	.
509	W	Cagl0F	2514	t	G	225	225	33	225	Ref[3];A[0];T[3];G[222];C[0]	.	pseudogene	CAGL0F00110g	.	.	-	no similaritypseudogene	.
510	W	Cagl0F	2516	g	A	102	225	25	42	Ref[0];A[38];T[0];G[0];C[1]	Gap[3]	pseudogene	CAGL0F00110g	.	.	-	no similaritypseudogene	.
511	W	Cagl0F	3150	t	G	225	225	32	795	Ref[1];A[0];T[1];G[247];C[1]	Gap[546]	pseudogene	CAGL0F00110g	.	.	-	no similaritypseudogene	.
512	W	Cagl0F	3273	g	K	212	212	31	259	Ref[100];A[1];T[148];G[100];C[10]	+AA[1]	pseudogene	CAGL0F00110g	.	.	-	no similaritypseudogene	.
513	W	Cagl0F	3274	t	Y	110	110	30	186	Ref[107];A[1];T[107];G[0];C[78]	.	pseudogene	CAGL0F00110g	.	.	-	no similaritypseudogene	.
514	W	Cagl0G	56	t	K	220	228	30	1722	Ref[469];A[1];T[469];G[1252];C[0]	.	.	LEFT[ - ];RIGHT[ pseudogene:CAGL0G00110g:2726-5683 ]	.	.	.	.	.
515	W	Cagl0G	61	a	R	228	228	30	2088	Ref[1169];A[1169];T[1];G[918];C[0]	.	.	LEFT[ - ];RIGHT[ pseudogene:CAGL0G00110g:2726-5683 ]	.	.	.	.	.
516	W	Cagl0G	62	t	K	228	228	31	2129	Ref[1190];A[0];T[1190];G[939];C[0]	.	.	LEFT[ - ];RIGHT[ pseudogene:CAGL0G00110g:2726-5683 ]	.	.	.	.	.
517	W	Cagl0G	65	g	K	228	228	31	2317	Ref[1264];A[1];T[1052];G[1264];C[0]	.	.	LEFT[ - ];RIGHT[ pseudogene:CAGL0G00110g:2726-5683 ]	.	.	.	.	.
518	W	Cagl0G	340	c	Y	209	209	37	2834	Ref[1913];A[0];T[921];G[0];C[1913]	.	.	LEFT[ - ];RIGHT[ pseudogene:CAGL0G00110g:2726-5683 ]	.	.	.	.	.
519	W	Cagl0G	342	t	W	228	228	37	2943	Ref[1950];A[992];T[1950];G[0];C[1]	.	.	LEFT[ - ];RIGHT[ pseudogene:CAGL0G00110g:2726-5683 ]	.	.	.	.	.
520	W	Cagl0G	347	t	W	108	108	37	3093	Ref[2488];A[604];T[2488];G[0];C[1]	+A[505]	.	LEFT[ - ];RIGHT[ pseudogene:CAGL0G00110g:2726-5683 ]	.	.	.	.	.
521	W	Cagl0G	1560	t	W	135	135	36	938	Ref[710];A[228];T[710];G[0];C[0]	.	.	LEFT[ - ];RIGHT[ pseudogene:CAGL0G00110g:2726-5683 ]	.	.	.	.	.
522	W	Cagl0G	1567	t	W	54	54	36	962	Ref[748];A[213];T[748];G[0];C[1]	.	.	LEFT[ - ];RIGHT[ pseudogene:CAGL0G00110g:2726-5683 ]	.	.	.	.	.
523	W	Cagl0G	1568	a	R	22	22	36	965	Ref[752];A[752];T[0];G[213];C[0]	.	.	LEFT[ - ];RIGHT[ pseudogene:CAGL0G00110g:2726-5683 ]	.	.	.	.	.
524	W	Cagl0G	3697	c	Y	185	185	31	1330	Ref[693];A[0];T[637];G[0];C[693]	.	pseudogene	CAGL0G00110g	.	.	-	no similarity frameshiftpseudogene	.
525	W	Cagl0G	3698	a	R	172	172	31	1321	Ref[687];A[687];T[0];G[634];C[0]	.	pseudogene	CAGL0G00110g	.	.	-	no similarity frameshiftpseudogene	.
526	W	Cagl0G	3704	t	W	163	163	31	1313	Ref[692];A[620];T[692];G[1];C[0]	.	pseudogene	CAGL0G00110g	.	.	-	no similarity frameshiftpseudogene	.
527	W	Cagl0G	652055	c	T	78	225	32	70	Ref[5];A[0];T[65];G[0];C[5]	.	CDS	CAGL0G06842g	GL3C0982	CAG59585.1	-	weakly similar to uniprot|P47068 Saccharomyces cerevisiae YJL020c	product=CAGL0G06842p;db_xref=PhylomeDB:CAGL0G06842g;db_xref=InterPro:IPR001452;db_xref=UniProtKB/TrEMBL:Q6FSY6;
528	W	Cagl0G	652056	a	G	2	213	32	72	Ref[8];A[8];T[0];G[64];C[0]	.	CDS	CAGL0G06842g	GL3C0982	CAG59585.1	-	weakly similar to uniprot|P47068 Saccharomyces cerevisiae YJL020c	product=CAGL0G06842p;db_xref=PhylomeDB:CAGL0G06842g;db_xref=InterPro:IPR001452;db_xref=UniProtKB/TrEMBL:Q6FSY6;
529	W	Cagl0G	652057	t	K	63	63	33	77	Ref[63];A[0];T[63];G[14];C[0]	.	CDS	CAGL0G06842g	GL3C0982	CAG59585.1	-	weakly similar to uniprot|P47068 Saccharomyces cerevisiae YJL020c	product=CAGL0G06842p;db_xref=PhylomeDB:CAGL0G06842g;db_xref=InterPro:IPR001452;db_xref=UniProtKB/TrEMBL:Q6FSY6;
530	W	Cagl0G	652058	g	S	146	146	33	82	Ref[61];A[0];T[0];G[61];C[21]	.	CDS	CAGL0G06842g	GL3C0982	CAG59585.1	-	weakly similar to uniprot|P47068 Saccharomyces cerevisiae YJL020c	product=CAGL0G06842p;db_xref=PhylomeDB:CAGL0G06842g;db_xref=InterPro:IPR001452;db_xref=UniProtKB/TrEMBL:Q6FSY6;
531	W	Cagl0G	652059	a	K	221	225	33	82	Ref[0];A[0];T[25];G[57];C[0]	.	CDS	CAGL0G06842g	GL3C0982	CAG59585.1	-	weakly similar to uniprot|P47068 Saccharomyces cerevisiae YJL020c	product=CAGL0G06842p;db_xref=PhylomeDB:CAGL0G06842g;db_xref=InterPro:IPR001452;db_xref=UniProtKB/TrEMBL:Q6FSY6;
532	W	Cagl0G	652062	t	W	208	208	33	81	Ref[38];A[43];T[38];G[0];C[0]	.	CDS	CAGL0G06842g	GL3C0982	CAG59585.1	-	weakly similar to uniprot|P47068 Saccharomyces cerevisiae YJL020c	product=CAGL0G06842p;db_xref=PhylomeDB:CAGL0G06842g;db_xref=InterPro:IPR001452;db_xref=UniProtKB/TrEMBL:Q6FSY6;
533	W	Cagl0G	652065	a	R	140	140	33	80	Ref[50];A[50];T[0];G[30];C[0]	.	CDS	CAGL0G06842g	GL3C0982	CAG59585.1	-	weakly similar to uniprot|P47068 Saccharomyces cerevisiae YJL020c	product=CAGL0G06842p;db_xref=PhylomeDB:CAGL0G06842g;db_xref=InterPro:IPR001452;db_xref=UniProtKB/TrEMBL:Q6FSY6;
534	W	Cagl0H	4676	c	M	75	75	35	33	Ref[26];A[7];T[0];G[0];C[26]	.	pseudogene	CAGL0H00132g	.	.	-	some similarities with uniprot|P08640 Saccharomyces cerevisiae YIR019c STA1 no start frameshiftpseudogene	.
535	W	Cagl0H	4679	t	Y	217	228	36	51	Ref[19];A[0];T[19];G[0];C[28]	Gap[4]	pseudogene	CAGL0H00132g	.	.	-	some similarities with uniprot|P08640 Saccharomyces cerevisiae YIR019c STA1 no start frameshiftpseudogene	.
536	W	Cagl0H	4680	t	K	108	108	37	52	Ref[39];A[0];T[39];G[13];C[0]	.	pseudogene	CAGL0H00132g	.	.	-	some similarities with uniprot|P08640 Saccharomyces cerevisiae YIR019c STA1 no start frameshiftpseudogene	.
537	W	Cagl0H	4681	g	K	55	121	37	66	Ref[39];A[0];T[17];G[39];C[10]	-C[35]	pseudogene	CAGL0H00132g	.	.	-	some similarities with uniprot|P08640 Saccharomyces cerevisiae YIR019c STA1 no start frameshiftpseudogene	.
538	W	Cagl0H	4682	c	S	56	228	37	76	Ref[7];A[0];T[0];G[34];C[7]	Gap[35]	pseudogene	CAGL0H00132g	.	.	-	some similarities with uniprot|P08640 Saccharomyces cerevisiae YIR019c STA1 no start frameshiftpseudogene	.
539	W	Cagl0H	5150	a	C	69	225	30	25	Ref[0];A[0];T[0];G[0];C[25]	.	pseudogene	CAGL0H00132g	.	.	-	some similarities with uniprot|P08640 Saccharomyces cerevisiae YIR019c STA1 no start frameshiftpseudogene	.
540	W	Cagl0H	5154	a	T	72	225	30	25	Ref[0];A[0];T[25];G[0];C[0]	.	pseudogene	CAGL0H00132g	.	.	-	some similarities with uniprot|P08640 Saccharomyces cerevisiae YIR019c STA1 no start frameshiftpseudogene	.
541	W	Cagl0H	5158	a	T	72	225	30	25	Ref[0];A[0];T[25];G[0];C[0]	.	pseudogene	CAGL0H00132g	.	.	-	some similarities with uniprot|P08640 Saccharomyces cerevisiae YIR019c STA1 no start frameshiftpseudogene	.
542	W	Cagl0H	6287	a	T	225	225	35	396	Ref[0];A[0];T[396];G[0];C[0]	.	pseudogene	CAGL0H00132g	.	.	-	some similarities with uniprot|P08640 Saccharomyces cerevisiae YIR019c STA1 no start frameshiftpseudogene	.
543	W	Cagl0H	6293	g	C	225	225	33	391	Ref[0];A[0];T[0];G[0];C[391]	.	pseudogene	CAGL0H00132g	.	.	-	some similarities with uniprot|P08640 Saccharomyces cerevisiae YIR019c STA1 no start frameshiftpseudogene	.
544	W	Cagl0H	6294	g	T	225	225	33	388	Ref[1];A[0];T[387];G[1];C[0]	.	pseudogene	CAGL0H00132g	.	.	-	some similarities with uniprot|P08640 Saccharomyces cerevisiae YIR019c STA1 no start frameshiftpseudogene	.
545	W	Cagl0I	7127	g	S	90	90	36	77	Ref[59];A[0];T[0];G[59];C[18]	.	pseudogene	CAGL0I00110g	.	.	-	some similarities with uniprot|P38894 Saccharomyces cerevisiae YHR211w FLO5 no start frameshiftpseudogene	.
546	W	Cagl0I	7128	t	K	174	174	36	84	Ref[59];A[0];T[59];G[25];C[0]	.	pseudogene	CAGL0I00110g	.	.	-	some similarities with uniprot|P38894 Saccharomyces cerevisiae YHR211w FLO5 no start frameshiftpseudogene	.
547	W	Cagl0I	7130	g	T	105	225	35	95	Ref[0];A[0];T[36];G[0];C[0]	Gap[59]	pseudogene	CAGL0I00110g	.	.	-	some similarities with uniprot|P38894 Saccharomyces cerevisiae YHR211w FLO5 no start frameshiftpseudogene	.
548	W	Cagl0J	2850	g	C	102	225	31	47	Ref[2];A[0];T[0];G[2];C[45]	.	pseudogene	CAGL0J00110g	.	.	-	no similarity frameshiftpseudogene	.
549	W	Cagl0J	2851	c	T	80	225	30	39	Ref[2];A[0];T[37];G[0];C[2]	.	pseudogene	CAGL0J00110g	.	.	-	no similarity frameshiftpseudogene	.
550	W	Cagl0J	2853	t	G	64	223	28	27	Ref[1];A[0];T[1];G[26];C[0]	.	pseudogene	CAGL0J00110g	.	.	-	no similarity frameshiftpseudogene	.
551	W	Cagl0J	2856	c	G	24	40	11	13	Ref[1];A[0];T[0];G[12];C[1]	.	pseudogene	CAGL0J00110g	.	.	-	no similarity frameshiftpseudogene	.
552	W	Cagl0J	387164	c	M	42	42	36	157	Ref[125];A[27];T[4];G[0];C[125]	-A[122];Gap[1]	CDS	CAGL0J04114g	GL3C0013	CAG60833.1	-	similar to uniprot|Q99297 Saccharomyces cerevisiae YOR222w ODC2 or uniprot|Q03028 Saccharomyces cerevisiae YPL134c ODC1	inference=similar to AA sequence:UniProtKB:Q99297;product=CAGL0J04114p;db_xref=PhylomeDB:CAGL0J04114g;db_xref=GOA:Q6FPG0;db_xref=InterPro:IPR001993;db_xref=InterPro:IPR002113;db_xref=InterPro:IPR018108;db_xref=UniProtKB/TrEMBL:Q6FPG0;
553	W	Cagl0J	387165	a	M	146	146	35	160	Ref[26];A[26];T[0];G[0];C[11]	Gap[123]	CDS	CAGL0J04114g	GL3C0013	CAG60833.1	-	similar to uniprot|Q99297 Saccharomyces cerevisiae YOR222w ODC2 or uniprot|Q03028 Saccharomyces cerevisiae YPL134c ODC1	inference=similar to AA sequence:UniProtKB:Q99297;product=CAGL0J04114p;db_xref=PhylomeDB:CAGL0J04114g;db_xref=GOA:Q6FPG0;db_xref=InterPro:IPR001993;db_xref=InterPro:IPR002113;db_xref=InterPro:IPR018108;db_xref=UniProtKB/TrEMBL:Q6FPG0;
554	W	Cagl0J	1191582	t	W	29	29	36	1578	Ref[1258];A[319];T[1258];G[0];C[1]	.	pseudogene	CAGL0J11990g	.	.	+	some similarities with uniprot|P38739 Saccharomyces cerevisiae YHL028w WSC4 no start frameshiftpseudogene	.
555	W	Cagl0J	1191583	c	S	75	75	36	1578	Ref[1259];A[0];T[0];G[319];C[1259]	.	pseudogene	CAGL0J11990g	.	.	+	some similarities with uniprot|P38739 Saccharomyces cerevisiae YHL028w WSC4 no start frameshiftpseudogene	.
556	W	Cagl0J	1191587	c	Y	33	33	36	1541	Ref[1231];A[0];T[310];G[0];C[1231]	.	pseudogene	CAGL0J11990g	.	.	+	some similarities with uniprot|P38739 Saccharomyces cerevisiae YHL028w WSC4 no start frameshiftpseudogene	.
557	W	Cagl0J	1191588	c	S	123	123	36	1516	Ref[1213];A[1];T[1];G[301];C[1213]	.	pseudogene	CAGL0J11990g	.	.	+	some similarities with uniprot|P38739 Saccharomyces cerevisiae YHL028w WSC4 no start frameshiftpseudogene	.
558	W	Cagl0J	1192807	g	R	228	228	34	1436	Ref[873];A[562];T[1];G[873];C[0]	.	.	LEFT[ pseudogene:CAGL0J11990g:1188177-1192028 ];RIGHT[ - ]	.	.	.	.	.
559	W	Cagl0J	1192809	a	R	228	228	34	1455	Ref[915];A[915];T[0];G[540];C[0]	.	.	LEFT[ pseudogene:CAGL0J11990g:1188177-1192028 ];RIGHT[ - ]	.	.	.	.	.
560	W	Cagl0J	1192817	a	R	228	228	35	1491	Ref[896];A[896];T[0];G[595];C[0]	.	.	LEFT[ pseudogene:CAGL0J11990g:1188177-1192028 ];RIGHT[ - ]	.	.	.	.	.
561	W	Cagl0J	1194236	a	R	161	161	33	1565	Ref[1044];A[1044];T[0];G[521];C[0]	.	.	LEFT[ pseudogene:CAGL0J11990g:1188177-1192028 ];RIGHT[ - ]	.	.	.	.	.
562	W	Cagl0J	1194243	a	R	32	32	33	1442	Ref[953];A[953];T[0];G[489];C[0]	.	.	LEFT[ pseudogene:CAGL0J11990g:1188177-1192028 ];RIGHT[ - ]	.	.	.	.	.
563	W	Cagl0J	1194246	a	W	93	93	33	1405	Ref[937];A[937];T[468];G[0];C[0]	.	.	LEFT[ pseudogene:CAGL0J11990g:1188177-1192028 ];RIGHT[ - ]	.	.	.	.	.
564	W	Cagl0J	1194247	g	K	112	112	33	1394	Ref[933];A[0];T[461];G[933];C[0]	.	.	LEFT[ pseudogene:CAGL0J11990g:1188177-1192028 ];RIGHT[ - ]	.	.	.	.	.
565	W	Cagl0J	1194460	c	M	2	2	34	1750	Ref[1391];A[357];T[2];G[0];C[1391]	.	.	LEFT[ pseudogene:CAGL0J11990g:1188177-1192028 ];RIGHT[ - ]	.	.	.	.	.
566	W	Cagl0J	1194469	t	Y	84	84	35	1658	Ref[1257];A[0];T[1257];G[0];C[401]	.	.	LEFT[ pseudogene:CAGL0J11990g:1188177-1192028 ];RIGHT[ - ]	.	.	.	.	.
567	W	Cagl0J	1194470	t	Y	100	100	35	1642	Ref[1241];A[0];T[1241];G[0];C[401]	.	.	LEFT[ pseudogene:CAGL0J11990g:1188177-1192028 ];RIGHT[ - ]	.	.	.	.	.
568	W	Cagl0K	3839	a	R	228	228	36	1463	Ref[938];A[938];T[0];G[525];C[0]	.	CDS	CAGL0K00110g	GL3M4601	CAG61192.1	-	some similarities with uniprot|Q08294 Saccharomyces cerevisiae YOL155c	product=CAGL0K00110p;db_xref=PhylomeDB:CAGL0K00110g;db_xref=InterPro:IPR021031;db_xref=UniProtKB/TrEMBL:Q6FNG1;
569	W	Cagl0K	3842	t	K	228	228	36	1730	Ref[933];A[0];T[933];G[793];C[4]	.	CDS	CAGL0K00110g	GL3M4601	CAG61192.1	-	some similarities with uniprot|Q08294 Saccharomyces cerevisiae YOL155c	product=CAGL0K00110p;db_xref=PhylomeDB:CAGL0K00110g;db_xref=InterPro:IPR021031;db_xref=UniProtKB/TrEMBL:Q6FNG1;
570	W	Cagl0K	3843	t	K	228	228	36	1842	Ref[931];A[0];T[931];G[910];C[1]	.	CDS	CAGL0K00110g	GL3M4601	CAG61192.1	-	some similarities with uniprot|Q08294 Saccharomyces cerevisiae YOL155c	product=CAGL0K00110p;db_xref=PhylomeDB:CAGL0K00110g;db_xref=InterPro:IPR021031;db_xref=UniProtKB/TrEMBL:Q6FNG1;
571	W	Cagl0K	154993	t	C	6	46	33	26	Ref[3];A[0];T[3];G[5];C[18]	.	.	LEFT[ CDS:CAGL0K01727g:153398-154897 ];RIGHT[ CDS:CAGL0K01749g:155385-159134 ]	.	.	.	.	.
572	W	Cagl0K	154994	c	Y	17	59	35	27	Ref[12];A[0];T[14];G[1];C[12]	.	.	LEFT[ CDS:CAGL0K01727g:153398-154897 ];RIGHT[ CDS:CAGL0K01749g:155385-159134 ]	.	.	.	.	.
573	W	Cagl0M	1402442	c	M	196	228	36	1899	Ref[560];A[1339];T[0];G[0];C[560]	-T[184]	.	LEFT[ CDS:CAGL0M14113g:1397407-1399152 ];RIGHT[ - ]	.	.	.	.	.
574	W	Cagl0M	1402443	t	Y	34	167	36	2119	Ref[362];A[0];T[362];G[0];C[1573]	Gap[184]	.	LEFT[ CDS:CAGL0M14113g:1397407-1399152 ];RIGHT[ - ]	.	.	.	.	.
575		Cagl0A	1410	a	R	135	135	32	1195	Ref[862];A[862];T[0];G[333];C[0]	.	.	LEFT[ - ];RIGHT[ CDS:CAGL0A00165g:18037-18876 ]	.	.	.	.	.
576		Cagl0A	1454	c	Y	142	142	35	1450	Ref[998];A[0];T[450];G[0];C[998]	Gap[2]	.	LEFT[ - ];RIGHT[ CDS:CAGL0A00165g:18037-18876 ]	.	.	.	.	.
577		Cagl0A	1478	*	*/+G	15854	15854	37	1416	*[914];+G[502]	Other[0]	.	LEFT[ - ];RIGHT[ CDS:CAGL0A00165g:18037-18876 ]	.	.	.	.	.
578		Cagl0A	1492	t	W	228	228	36	1507	Ref[937];A[570];T[937];G[0];C[0]	.	.	LEFT[ - ];RIGHT[ CDS:CAGL0A00165g:18037-18876 ]	.	.	.	.	.
579		Cagl0A	10299	a	R	98	220	34	3945	Ref[904];A[904];T[2];G[3039];C[0]	.	.	LEFT[ - ];RIGHT[ CDS:CAGL0A00165g:18037-18876 ]	.	.	.	.	.
580		Cagl0A	10315	t	Y	37	215	35	6197	Ref[923];A[0];T[923];G[1];C[5273]	.	.	LEFT[ - ];RIGHT[ CDS:CAGL0A00165g:18037-18876 ]	.	.	.	.	.
581		Cagl0A	10387	g	R	7	213	36	5475	Ref[943];A[4531];T[0];G[943];C[1]	.	.	LEFT[ - ];RIGHT[ CDS:CAGL0A00165g:18037-18876 ]	.	.	.	.	.
582		Cagl0A	10409	*	+A/*	27264	29965	36	2276	+A[328];*[1948]	Other[0]	.	LEFT[ - ];RIGHT[ CDS:CAGL0A00165g:18037-18876 ]	.	.	.	.	.
583		Cagl0A	36449	*	*/-t	37	37	36	466	*[414];-t[20]	Other[32]	.	LEFT[ CDS:CAGL0A00363g:33995-36349 ];RIGHT[ CDS:CAGL0A00385g:37162-40371 ]	.	.	.	.	.
584		Cagl0A	170405	*	*/-t	112	112	35	34	*[30];-t[4]	Other[0]	.	LEFT[ CDS:CAGL0A01716g:169567-170202 ];RIGHT[ CDS:CAGL0A01738g:170940-172349 ]	.	.	.	.	.
585		Cagl0A	170452	t	C	102	223	37	89	Ref[11];A[0];T[11];G[0];C[78]	.	.	LEFT[ CDS:CAGL0A01716g:169567-170202 ];RIGHT[ CDS:CAGL0A01738g:170940-172349 ]	.	.	.	.	.
586		Cagl0A	238527	*	*/-c	737	737	37	316	*[284];-c[31]	Other[1]	.	LEFT[ CDS:CAGL0A02233g:235820-237469 ];RIGHT[ CDS:CAGL0A02255g:244683-245501 ]	.	.	.	.	.
587		Cagl0A	409403	*	*/-c	776	776	37	390	*[345];-c[37]	Other[8]	.	LEFT[ CDS:CAGL0A04081g:408064-409188 ];RIGHT[ CDS:CAGL0A04103g:409523-410077 ]	.	.	.	.	.
588		Cagl0A	424394	*	*/-t	178	178	37	468	*[410];-t[33]	Other[25]	.	LEFT[ CDS:CAGL0A04257g:422355-424289 ];RIGHT[ CDS:CAGL0A04279g:425058-426212 ]	.	.	.	.	.
589		Cagl0A	424693	*	*/-a	394	394	35	123	*[112];-a[11]	Other[0]	.	LEFT[ CDS:CAGL0A04257g:422355-424289 ];RIGHT[ CDS:CAGL0A04279g:425058-426212 ]	.	.	.	.	.
590		Cagl0A	455809	*	*/-a	164	164	37	651	*[582];-a[36]	Other[33]	.	LEFT[ CDS:CAGL0A04587g:454151-455479 ];RIGHT[ CDS:CAGL0A04631g:456156-457241 ]	.	.	.	.	.
591		Cagl0A	485422	a	M	228	228	29	1314	Ref[809];A[809];T[1];G[1];C[503]	.	.	LEFT[ pseudogene:CAGL0A04873g:482956-484291 ];RIGHT[ - ]	.	.	.	.	.
592		Cagl0A	485446	c	S	228	228	34	1339	Ref[649];A[0];T[1];G[689];C[649]	.	.	LEFT[ pseudogene:CAGL0A04873g:482956-484291 ];RIGHT[ - ]	.	.	.	.	.
593		Cagl0A	485487	g	R	228	228	36	1286	Ref[653];A[633];T[0];G[653];C[0]	.	.	LEFT[ pseudogene:CAGL0A04873g:482956-484291 ];RIGHT[ - ]	.	.	.	.	.
594		Cagl0A	485496	a	R	228	228	34	1303	Ref[680];A[680];T[0];G[622];C[1]	.	.	LEFT[ pseudogene:CAGL0A04873g:482956-484291 ];RIGHT[ - ]	.	.	.	.	.
595		Cagl0B	513	g	K	167	167	36	1133	Ref[857];A[0];T[276];G[857];C[0]	.	.	LEFT[ - ];RIGHT[ pseudogene:CAGL0B00110g:1701-4408 ]	.	.	.	.	.
596		Cagl0B	711	t	Y	80	80	36	972	Ref[740];A[1];T[740];G[0];C[231]	.	.	LEFT[ - ];RIGHT[ pseudogene:CAGL0B00110g:1701-4408 ]	.	.	.	.	.
597		Cagl0B	718	t	W	143	143	36	945	Ref[713];A[232];T[713];G[0];C[0]	.	.	LEFT[ - ];RIGHT[ pseudogene:CAGL0B00110g:1701-4408 ]	.	.	.	.	.
598		Cagl0B	756	a	R	185	185	36	849	Ref[616];A[616];T[0];G[233];C[0]	.	.	LEFT[ - ];RIGHT[ pseudogene:CAGL0B00110g:1701-4408 ]	.	.	.	.	.
599		Cagl0B	771	c	Y	80	80	36	762	Ref[585];A[0];T[177];G[0];C[585]	.	.	LEFT[ - ];RIGHT[ pseudogene:CAGL0B00110g:1701-4408 ]	.	.	.	.	.
600		Cagl0B	1226	t	Y	52	52	28	1229	Ref[803];A[0];T[803];G[0];C[426]	.	.	LEFT[ - ];RIGHT[ pseudogene:CAGL0B00110g:1701-4408 ]	.	.	.	.	.
601		Cagl0B	1236	t	Y	107	107	26	1323	Ref[814];A[0];T[814];G[0];C[509]	.	.	LEFT[ - ];RIGHT[ pseudogene:CAGL0B00110g:1701-4408 ]	.	.	.	.	.
602		Cagl0B	1238	t	W	75	75	26	1350	Ref[827];A[523];T[827];G[0];C[0]	.	.	LEFT[ - ];RIGHT[ pseudogene:CAGL0B00110g:1701-4408 ]	.	.	.	.	.
603		Cagl0B	30687	*	*/-a	385	385	37	840	*[752];-a[53]	Other[35]	.	LEFT[ CDS:CAGL0B00418g:26584-28815 ];RIGHT[ CDS:CAGL0B00440g:31504-32313 ]	.	.	.	.	.
604		Cagl0B	72550	*	*/-t	845	845	37	461	*[384];-t[36]	Other[41]	.	LEFT[ CDS:CAGL0B00792g:70860-72197 ];RIGHT[ CDS:CAGL0B00814g:73366-74454 ]	.	.	.	.	.
605		Cagl0B	89362	a	M	4	4	37	63	Ref[50];A[50];T[0];G[0];C[13]	.	.	LEFT[ CDS:CAGL0B00990g:86229-86810 ];RIGHT[ CDS:CAGL0B01012g:91330-93201 ]	.	.	.	.	.
606		Cagl0B	122983	*	*/-at	2309	2309	37	509	*[458];-at[40]	Other[11]	.	LEFT[ CDS:CAGL0B01353g:120462-122519 ];RIGHT[ CDS:CAGL0B01375g:123330-126662 ]	.	.	.	.	.
607		Cagl0B	205742	*	*/-t	203	203	37	494	*[425];-t[34]	Other[35]	.	LEFT[ CDS:CAGL0B02189g:202354-205617 ];RIGHT[ CDS:CAGL0B02211g:206410-212784 ]	.	.	.	.	.
608		Cagl0B	261558	*	*/-g	645	645	37	346	*[308];-g[33]	Other[5]	.	LEFT[ CDS:CAGL0B02717g:258671-260722 ];RIGHT[ CDS:CAGL0B02739g:262590-264620 ]	.	.	.	.	.
609		Cagl0B	271358	*	*/-a	563	563	37	425	*[363];-a[35]	Other[27]	.	LEFT[ CDS:CAGL0B02794g:269303-270751 ];RIGHT[ CDS:CAGL0B02816g:271482-274166 ]	.	.	.	.	.
610		Cagl0B	361566	*	+G/+G	1217	16093	37	393	+G[357];*[36]	Other[0]	.	LEFT[ CDS:CAGL0B03611g:360764-360952 ];RIGHT[ CDS:CAGL0B03619g:361572-362978 ]	.	.	.	.	.
611		Cagl0B	424020	*	*/-a	177	177	37	627	*[548];-a[35]	Other[44]	.	LEFT[ CDS:CAGL0B04323g:422687-423979 ];RIGHT[ CDS:CAGL0B04345g:424411-425592 ]	.	.	.	.	.
612		Cagl0B	434516	*	*/-t	2875	2875	36	465	*[347];-t[49]	Other[69]	.	LEFT[ CDS:CAGL0B04433g:432245-434227 ];RIGHT[ CDS:CAGL0B04455g:435437-437254 ]	.	.	.	.	.
613		Cagl0B	480477	*	+GT/*	16798	28110	37	696	+GT[323];*[339]	Other[34]	.	LEFT[ CDS:CAGL0B04917g:477939-479174 ];RIGHT[ CDS:CAGL0B04939g:480761-482563 ]	.	.	.	.	.
614		Cagl0B	480509	*	+GA/*	11356	18478	37	700	+GA[7];*[693]	Other[0]	.	LEFT[ CDS:CAGL0B04917g:477939-479174 ];RIGHT[ CDS:CAGL0B04939g:480761-482563 ]	.	.	.	.	.
615		Cagl0B	502015	g	S	93	93	27	947	Ref[709];A[1];T[1];G[709];C[236]	.	.	LEFT[ pseudogene:CAGL0B05093g:498198-501364 ];RIGHT[ - ]	.	.	.	.	.
616		Cagl0B	502074	c	S	168	168	34	267	Ref[187];A[0];T[0];G[80];C[187]	.	.	LEFT[ pseudogene:CAGL0B05093g:498198-501364 ];RIGHT[ - ]	.	.	.	.	.
617		Cagl0B	502088	*	*/+AG	3236	3236	36	150	*[101];+AG[49]	Other[0]	.	LEFT[ pseudogene:CAGL0B05093g:498198-501364 ];RIGHT[ - ]	.	.	.	.	.
618		Cagl0C	347	c	Y	228	228	37	1682	Ref[940];A[0];T[742];G[0];C[940]	.	.	LEFT[ - ];RIGHT[ CDS:CAGL0C00110g:2137-4284 ]	.	.	.	.	.
619		Cagl0C	895	g	A	225	225	33	1546	Ref[157];A[1389];T[0];G[157];C[0]	.	.	LEFT[ - ];RIGHT[ CDS:CAGL0C00110g:2137-4284 ]	.	.	.	.	.
620		Cagl0C	943	*	*/+AT	38	38	23	952	*[950];+AT[2]	Other[0]	.	LEFT[ - ];RIGHT[ CDS:CAGL0C00110g:2137-4284 ]	.	.	.	.	.
621		Cagl0C	7156	*	*/-at	2094	2094	34	718	*[659];-at[50]	Other[9]	.	LEFT[ CDS:CAGL0C00110g:2137-4284 ];RIGHT[ gap::11452-11551 ]	.	.	.	.	.
622		Cagl0C	80865	*	*/-a	157	157	36	234	*[223];-a[5]	Other[6]	.	LEFT[ CDS:CAGL0C00759g:78078-80435 ];RIGHT[ CDS:CAGL0C00781g:81411-82193 ]	.	.	.	.	.
623		Cagl0C	84166	c	S	133	133	33	854	Ref[604];A[1];T[0];G[249];C[604]	.	.	LEFT[ CDS:CAGL0C00781g:81411-82193 ];RIGHT[ CDS:CAGL0C00847g:86130-88502 ]	.	.	.	.	.
624		Cagl0C	84182	t	W	87	87	36	806	Ref[622];A[183];T[622];G[0];C[1]	.	.	LEFT[ CDS:CAGL0C00781g:81411-82193 ];RIGHT[ CDS:CAGL0C00847g:86130-88502 ]	.	.	.	.	.
625		Cagl0C	84252	g	K	48	48	35	698	Ref[539];A[0];T[159];G[539];C[0]	.	.	LEFT[ CDS:CAGL0C00781g:81411-82193 ];RIGHT[ CDS:CAGL0C00847g:86130-88502 ]	.	.	.	.	.
626		Cagl0C	84267	t	Y	50	50	35	763	Ref[560];A[0];T[560];G[0];C[203]	.	.	LEFT[ CDS:CAGL0C00781g:81411-82193 ];RIGHT[ CDS:CAGL0C00847g:86130-88502 ]	.	.	.	.	.
627		Cagl0C	84284	g	R	193	193	34	874	Ref[558];A[315];T[1];G[558];C[0]	.	.	LEFT[ CDS:CAGL0C00781g:81411-82193 ];RIGHT[ CDS:CAGL0C00847g:86130-88502 ]	.	.	.	.	.
628		Cagl0C	84288	a	R	158	158	34	896	Ref[560];A[560];T[1];G[335];C[0]	.	.	LEFT[ CDS:CAGL0C00781g:81411-82193 ];RIGHT[ CDS:CAGL0C00847g:86130-88502 ]	.	.	.	.	.
629		Cagl0C	84346	t	K	141	141	35	725	Ref[510];A[1];T[510];G[214];C[0]	.	.	LEFT[ CDS:CAGL0C00781g:81411-82193 ];RIGHT[ CDS:CAGL0C00847g:86130-88502 ]	.	.	.	.	.
630		Cagl0C	85008	*	*/+TAT	1505	1505	37	627	*[582];+TAT[45]	Other[0]	.	LEFT[ CDS:CAGL0C00781g:81411-82193 ];RIGHT[ CDS:CAGL0C00847g:86130-88502 ]	.	.	.	.	.
631		Cagl0C	85127	g	R	228	228	30	1332	Ref[652];A[678];T[1];G[652];C[1]	.	.	LEFT[ CDS:CAGL0C00781g:81411-82193 ];RIGHT[ CDS:CAGL0C00847g:86130-88502 ]	.	.	.	.	.
632		Cagl0C	85446	g	R	3	3	36	817	Ref[624];A[193];T[0];G[624];C[0]	.	.	LEFT[ CDS:CAGL0C00781g:81411-82193 ];RIGHT[ CDS:CAGL0C00847g:86130-88502 ]	.	.	.	.	.
633		Cagl0C	90126	c	T	225	225	30	887	Ref[49];A[0];T[837];G[1];C[49]	.	.	LEFT[ CDS:CAGL0C00847g:86130-88502 ];RIGHT[ gap::91153-91252 ]	.	.	.	.	.
634		Cagl0C	90189	c	T	225	225	31	978	Ref[42];A[0];T[936];G[0];C[42]	.	.	LEFT[ CDS:CAGL0C00847g:86130-88502 ];RIGHT[ gap::91153-91252 ]	.	.	.	.	.
635		Cagl0C	90220	t	C	225	225	29	773	Ref[121];A[1];T[121];G[0];C[651]	.	.	LEFT[ CDS:CAGL0C00847g:86130-88502 ];RIGHT[ gap::91153-91252 ]	.	.	.	.	.
636		Cagl0C	90223	a	G	225	225	29	763	Ref[137];A[137];T[0];G[626];C[0]	.	.	LEFT[ CDS:CAGL0C00847g:86130-88502 ];RIGHT[ gap::91153-91252 ]	.	.	.	.	.
637		Cagl0C	90235	t	C	139	225	25	707	Ref[178];A[0];T[178];G[0];C[529]	.	.	LEFT[ CDS:CAGL0C00847g:86130-88502 ];RIGHT[ gap::91153-91252 ]	.	.	.	.	.
638		Cagl0C	90565	a	T	118	225	32	703	Ref[182];A[182];T[519];G[2];C[0]	.	.	LEFT[ CDS:CAGL0C00847g:86130-88502 ];RIGHT[ gap::91153-91252 ]	.	.	.	.	.
639		Cagl0C	90588	g	A	225	225	35	927	Ref[69];A[858];T[0];G[69];C[0]	.	.	LEFT[ CDS:CAGL0C00847g:86130-88502 ];RIGHT[ gap::91153-91252 ]	.	.	.	.	.
640		Cagl0C	90591	t	C	225	225	36	941	Ref[63];A[1];T[63];G[0];C[877]	.	.	LEFT[ CDS:CAGL0C00847g:86130-88502 ];RIGHT[ gap::91153-91252 ]	.	.	.	.	.
641		Cagl0C	90685	*	-g/-g	466	23229	34	756	-g[581];*[175]	Other[0]	.	LEFT[ CDS:CAGL0C00847g:86130-88502 ];RIGHT[ gap::91153-91252 ]	.	.	.	.	.
642		Cagl0C	90697	g	A	225	225	32	706	Ref[88];A[618];T[0];G[88];C[0]	.	.	LEFT[ CDS:CAGL0C00847g:86130-88502 ];RIGHT[ gap::91153-91252 ]	.	.	.	.	.
643		Cagl0C	90712	t	A	225	225	27	652	Ref[127];A[525];T[127];G[0];C[0]	.	.	LEFT[ CDS:CAGL0C00847g:86130-88502 ];RIGHT[ gap::91153-91252 ]	.	.	.	.	.
644		Cagl0C	93292	t	K	6	6	37	578	Ref[480];A[0];T[480];G[98];C[0]	.	.	LEFT[ gap::91153-91252 ];RIGHT[ CDS:CAGL0C00968g:96914-100018 ]	.	.	.	.	.
645		Cagl0C	93646	a	R	228	228	36	807	Ref[466];A[466];T[0];G[340];C[1]	.	.	LEFT[ gap::91153-91252 ];RIGHT[ CDS:CAGL0C00968g:96914-100018 ]	.	.	.	.	.
646		Cagl0C	93977	*	*/+G	4208	4208	37	912	*[599];+G[312]	Other[1]	.	LEFT[ gap::91153-91252 ];RIGHT[ CDS:CAGL0C00968g:96914-100018 ]	.	.	.	.	.
647		Cagl0C	94415	t	Y	160	160	36	784	Ref[577];A[0];T[577];G[0];C[207]	.	.	LEFT[ gap::91153-91252 ];RIGHT[ CDS:CAGL0C00968g:96914-100018 ]	.	.	.	.	.
648		Cagl0C	94436	c	M	216	216	37	863	Ref[560];A[302];T[0];G[1];C[560]	.	.	LEFT[ gap::91153-91252 ];RIGHT[ CDS:CAGL0C00968g:96914-100018 ]	.	.	.	.	.
649		Cagl0C	94505	c	M	228	228	36	1140	Ref[606];A[534];T[0];G[0];C[606]	.	.	LEFT[ gap::91153-91252 ];RIGHT[ CDS:CAGL0C00968g:96914-100018 ]	.	.	.	.	.
650		Cagl0C	96027	t	Y	228	228	37	1248	Ref[588];A[0];T[588];G[0];C[660]	.	.	LEFT[ gap::91153-91252 ];RIGHT[ CDS:CAGL0C00968g:96914-100018 ]	.	.	.	.	.
651		Cagl0C	96235	t	Y	228	228	37	1052	Ref[501];A[0];T[501];G[0];C[551]	.	.	LEFT[ gap::91153-91252 ];RIGHT[ CDS:CAGL0C00968g:96914-100018 ]	.	.	.	.	.
652		Cagl0C	96296	*	*/+G	11375	11375	37	889	*[553];+G[336]	Other[0]	.	LEFT[ gap::91153-91252 ];RIGHT[ CDS:CAGL0C00968g:96914-100018 ]	.	.	.	.	.
653		Cagl0C	96397	t	Y	199	199	36	895	Ref[609];A[0];T[609];G[0];C[286]	.	.	LEFT[ gap::91153-91252 ];RIGHT[ CDS:CAGL0C00968g:96914-100018 ]	.	.	.	.	.
654		Cagl0C	96432	t	Y	228	228	36	1163	Ref[652];A[0];T[652];G[0];C[511]	.	.	LEFT[ gap::91153-91252 ];RIGHT[ CDS:CAGL0C00968g:96914-100018 ]	.	.	.	.	.
655		Cagl0C	96485	*	-t/*	20760	21270	37	1294	-t[604];*[690]	Other[0]	.	LEFT[ gap::91153-91252 ];RIGHT[ CDS:CAGL0C00968g:96914-100018 ]	.	.	.	.	.
656		Cagl0C	96535	a	R	228	228	35	1358	Ref[655];A[655];T[0];G[703];C[0]	.	.	LEFT[ gap::91153-91252 ];RIGHT[ CDS:CAGL0C00968g:96914-100018 ]	.	.	.	.	.
657		Cagl0C	96551	a	M	228	228	34	1366	Ref[638];A[638];T[0];G[0];C[728]	.	.	LEFT[ gap::91153-91252 ];RIGHT[ CDS:CAGL0C00968g:96914-100018 ]	.	.	.	.	.
658		Cagl0C	96554	g	R	228	228	34	1359	Ref[625];A[734];T[0];G[625];C[0]	.	.	LEFT[ gap::91153-91252 ];RIGHT[ CDS:CAGL0C00968g:96914-100018 ]	.	.	.	.	.
659		Cagl0C	96563	t	Y	228	228	34	1403	Ref[641];A[1];T[641];G[1];C[760]	.	.	LEFT[ gap::91153-91252 ];RIGHT[ CDS:CAGL0C00968g:96914-100018 ]	.	.	.	.	.
660		Cagl0C	96599	t	Y	228	228	34	1437	Ref[658];A[0];T[658];G[0];C[779]	.	.	LEFT[ gap::91153-91252 ];RIGHT[ CDS:CAGL0C00968g:96914-100018 ]	.	.	.	.	.
661		Cagl0C	96637	t	Y	228	228	36	1192	Ref[605];A[0];T[605];G[0];C[587]	.	.	LEFT[ gap::91153-91252 ];RIGHT[ CDS:CAGL0C00968g:96914-100018 ]	.	.	.	.	.
662		Cagl0C	96706	*	*/+A	27	27	37	625	*[623];+A[2]	Other[0]	.	LEFT[ gap::91153-91252 ];RIGHT[ CDS:CAGL0C00968g:96914-100018 ]	.	.	.	.	.
663		Cagl0C	96746	a	R	166	166	36	821	Ref[595];A[595];T[0];G[226];C[0]	.	.	LEFT[ gap::91153-91252 ];RIGHT[ CDS:CAGL0C00968g:96914-100018 ]	.	.	.	.	.
664		Cagl0C	96756	g	K	194	194	36	859	Ref[584];A[0];T[273];G[584];C[2]	.	.	LEFT[ gap::91153-91252 ];RIGHT[ CDS:CAGL0C00968g:96914-100018 ]	.	.	.	.	.
665		Cagl0C	96792	g	R	206	206	36	887	Ref[612];A[274];T[0];G[612];C[1]	.	.	LEFT[ gap::91153-91252 ];RIGHT[ CDS:CAGL0C00968g:96914-100018 ]	.	.	.	.	.
666		Cagl0C	96811	t	W	164	164	36	882	Ref[626];A[256];T[626];G[0];C[0]	.	.	LEFT[ gap::91153-91252 ];RIGHT[ CDS:CAGL0C00968g:96914-100018 ]	.	.	.	.	.
667		Cagl0C	100045	g	S	48	48	31	440	Ref[293];A[0];T[2];G[293];C[145]	.	.	LEFT[ CDS:CAGL0C00968g:96914-100018 ];RIGHT[ gap::102374-102473 ]	.	.	.	.	.
668		Cagl0C	100048	c	T	225	225	31	394	Ref[0];A[0];T[394];G[0];C[0]	.	.	LEFT[ CDS:CAGL0C00968g:96914-100018 ];RIGHT[ gap::102374-102473 ]	.	.	.	.	.
669		Cagl0C	100089	c	T	72	225	31	120	Ref[30];A[0];T[90];G[0];C[30]	.	.	LEFT[ CDS:CAGL0C00968g:96914-100018 ];RIGHT[ gap::102374-102473 ]	.	.	.	.	.
670		Cagl0C	100109	*	-a/-a	242	2388	34	68	-a[45];*[23]	Other[0]	.	LEFT[ CDS:CAGL0C00968g:96914-100018 ];RIGHT[ gap::102374-102473 ]	.	.	.	.	.
671		Cagl0C	100185	g	K	228	228	36	617	Ref[300];A[0];T[317];G[300];C[0]	.	.	LEFT[ CDS:CAGL0C00968g:96914-100018 ];RIGHT[ gap::102374-102473 ]	.	.	.	.	.
672		Cagl0C	100207	*	-c/-c	1733	22300	37	565	-c[525];*[40]	Other[0]	.	LEFT[ CDS:CAGL0C00968g:96914-100018 ];RIGHT[ gap::102374-102473 ]	.	.	.	.	.
673		Cagl0C	100506	t	Y	228	228	30	1014	Ref[611];A[0];T[611];G[0];C[403]	.	.	LEFT[ CDS:CAGL0C00968g:96914-100018 ];RIGHT[ gap::102374-102473 ]	.	.	.	.	.
674		Cagl0C	100585	*	*/-c	3923	3923	27	1446	*[1242];-c[204]	Other[0]	.	LEFT[ CDS:CAGL0C00968g:96914-100018 ];RIGHT[ gap::102374-102473 ]	.	.	.	.	.
675		Cagl0C	100759	*	*/+C	10430	10430	30	1106	*[794];+C[312]	Other[0]	.	LEFT[ CDS:CAGL0C00968g:96914-100018 ];RIGHT[ gap::102374-102473 ]	.	.	.	.	.
676		Cagl0C	103703	t	K	228	228	36	1319	Ref[681];A[0];T[681];G[638];C[0]	.	.	LEFT[ gap::102374-102473 ];RIGHT[ pseudogene:CAGL0C01067g:104419-107905 ]	.	.	.	.	.
677		Cagl0C	103758	g	R	228	228	29	1148	Ref[648];A[500];T[0];G[648];C[0]	.	.	LEFT[ gap::102374-102473 ];RIGHT[ pseudogene:CAGL0C01067g:104419-107905 ]	.	.	.	.	.
678		Cagl0C	103774	t	W	228	228	25	1054	Ref[627];A[427];T[627];G[0];C[0]	.	.	LEFT[ gap::102374-102473 ];RIGHT[ pseudogene:CAGL0C01067g:104419-107905 ]	.	.	.	.	.
679		Cagl0C	107962	*	*/+T	24251	24251	37	1967	*[1228];+T[738]	Other[1]	.	LEFT[ pseudogene:CAGL0C01067g:104419-107905 ];RIGHT[ CDS:CAGL0C01133g:114805-117915 ]	.	.	.	.	.
680		Cagl0C	107976	a	W	228	228	37	1873	Ref[1163];A[1163];T[710];G[0];C[0]	.	.	LEFT[ pseudogene:CAGL0C01067g:104419-107905 ];RIGHT[ CDS:CAGL0C01133g:114805-117915 ]	.	.	.	.	.
681		Cagl0C	108005	c	M	228	228	37	1612	Ref[1141];A[471];T[0];G[0];C[1141]	.	.	LEFT[ pseudogene:CAGL0C01067g:104419-107905 ];RIGHT[ CDS:CAGL0C01133g:114805-117915 ]	.	.	.	.	.
682		Cagl0C	108103	*	-c/-c	683	7676	37	215	-c[141];*[74]	Other[0]	.	LEFT[ pseudogene:CAGL0C01067g:104419-107905 ];RIGHT[ CDS:CAGL0C01133g:114805-117915 ]	.	.	.	.	.
683		Cagl0C	108145	*	-g/-g	1148	14457	36	370	-g[250];*[120]	Other[0]	.	LEFT[ pseudogene:CAGL0C01067g:104419-107905 ];RIGHT[ CDS:CAGL0C01133g:114805-117915 ]	.	.	.	.	.
684		Cagl0C	108171	c	S	228	228	37	977	Ref[520];A[1];T[1];G[455];C[520]	.	.	LEFT[ pseudogene:CAGL0C01067g:104419-107905 ];RIGHT[ CDS:CAGL0C01133g:114805-117915 ]	.	.	.	.	.
685		Cagl0C	108187	t	Y	228	228	37	1234	Ref[639];A[0];T[639];G[0];C[595]	.	.	LEFT[ pseudogene:CAGL0C01067g:104419-107905 ];RIGHT[ CDS:CAGL0C01133g:114805-117915 ]	.	.	.	.	.
686		Cagl0C	108276	a	R	228	228	31	966	Ref[658];A[658];T[1];G[307];C[0]	.	.	LEFT[ pseudogene:CAGL0C01067g:104419-107905 ];RIGHT[ CDS:CAGL0C01133g:114805-117915 ]	.	.	.	.	.
687		Cagl0C	108411	g	T	225	225	27	167	Ref[0];A[0];T[166];G[0];C[1]	.	.	LEFT[ pseudogene:CAGL0C01067g:104419-107905 ];RIGHT[ CDS:CAGL0C01133g:114805-117915 ]	.	.	.	.	.
688		Cagl0C	108557	*	*/+C	1245	1245	23	579	*[507];+C[72]	Other[0]	.	LEFT[ pseudogene:CAGL0C01067g:104419-107905 ];RIGHT[ CDS:CAGL0C01133g:114805-117915 ]	.	.	.	.	.
689		Cagl0C	108800	g	R	12	12	36	389	Ref[309];A[80];T[0];G[309];C[0]	.	.	LEFT[ pseudogene:CAGL0C01067g:104419-107905 ];RIGHT[ CDS:CAGL0C01133g:114805-117915 ]	.	.	.	.	.
690		Cagl0C	108807	g	R	101	101	37	392	Ref[296];A[96];T[0];G[296];C[0]	.	.	LEFT[ pseudogene:CAGL0C01067g:104419-107905 ];RIGHT[ CDS:CAGL0C01133g:114805-117915 ]	.	.	.	.	.
691		Cagl0C	110198	t	W	92	92	33	1458	Ref[1094];A[364];T[1094];G[0];C[0]	.	.	LEFT[ pseudogene:CAGL0C01067g:104419-107905 ];RIGHT[ CDS:CAGL0C01133g:114805-117915 ]	.	.	.	.	.
692		Cagl0C	110199	t	W	71	71	33	1468	Ref[1096];A[372];T[1096];G[0];C[0]	.	.	LEFT[ pseudogene:CAGL0C01067g:104419-107905 ];RIGHT[ CDS:CAGL0C01133g:114805-117915 ]	.	.	.	.	.
693		Cagl0C	110227	a	R	108	108	36	1754	Ref[1317];A[1317];T[0];G[437];C[0]	.	.	LEFT[ pseudogene:CAGL0C01067g:104419-107905 ];RIGHT[ CDS:CAGL0C01133g:114805-117915 ]	.	.	.	.	.
694		Cagl0C	110256	a	M	100	100	35	1705	Ref[1273];A[1273];T[0];G[1];C[431]	.	.	LEFT[ pseudogene:CAGL0C01067g:104419-107905 ];RIGHT[ CDS:CAGL0C01133g:114805-117915 ]	.	.	.	.	.
695		Cagl0C	110267	a	M	129	129	35	1689	Ref[1269];A[1269];T[0];G[0];C[420]	.	.	LEFT[ pseudogene:CAGL0C01067g:104419-107905 ];RIGHT[ CDS:CAGL0C01133g:114805-117915 ]	.	.	.	.	.
696		Cagl0C	110281	a	R	121	121	36	1667	Ref[1247];A[1247];T[0];G[420];C[0]	.	.	LEFT[ pseudogene:CAGL0C01067g:104419-107905 ];RIGHT[ CDS:CAGL0C01133g:114805-117915 ]	.	.	.	.	.
697		Cagl0C	110302	a	R	192	192	36	1701	Ref[1266];A[1266];T[0];G[435];C[0]	.	.	LEFT[ pseudogene:CAGL0C01067g:104419-107905 ];RIGHT[ CDS:CAGL0C01133g:114805-117915 ]	.	.	.	.	.
698		Cagl0C	110506	a	R	228	228	36	1623	Ref[1145];A[1145];T[0];G[478];C[0]	.	.	LEFT[ pseudogene:CAGL0C01067g:104419-107905 ];RIGHT[ CDS:CAGL0C01133g:114805-117915 ]	.	.	.	.	.
699		Cagl0C	110524	g	R	198	198	36	1665	Ref[1164];A[501];T[0];G[1164];C[0]	.	.	LEFT[ pseudogene:CAGL0C01067g:104419-107905 ];RIGHT[ CDS:CAGL0C01133g:114805-117915 ]	.	.	.	.	.
700		Cagl0C	110526	g	K	205	205	36	1666	Ref[1170];A[0];T[496];G[1170];C[0]	.	.	LEFT[ pseudogene:CAGL0C01067g:104419-107905 ];RIGHT[ CDS:CAGL0C01133g:114805-117915 ]	.	.	.	.	.
701		Cagl0C	110549	t	Y	173	173	36	1620	Ref[1177];A[1];T[1177];G[0];C[442]	.	.	LEFT[ pseudogene:CAGL0C01067g:104419-107905 ];RIGHT[ CDS:CAGL0C01133g:114805-117915 ]	.	.	.	.	.
702		Cagl0C	110716	t	K	38	38	36	1623	Ref[1283];A[0];T[1283];G[339];C[1]	.	.	LEFT[ pseudogene:CAGL0C01067g:104419-107905 ];RIGHT[ CDS:CAGL0C01133g:114805-117915 ]	.	.	.	.	.
703		Cagl0C	110933	c	S	17	17	36	1621	Ref[1282];A[1];T[0];G[338];C[1282]	.	.	LEFT[ pseudogene:CAGL0C01067g:104419-107905 ];RIGHT[ CDS:CAGL0C01133g:114805-117915 ]	.	.	.	.	.
704		Cagl0C	111007	g	S	122	122	37	1534	Ref[1167];A[0];T[0];G[1167];C[367]	.	.	LEFT[ pseudogene:CAGL0C01067g:104419-107905 ];RIGHT[ CDS:CAGL0C01133g:114805-117915 ]	.	.	.	.	.
705		Cagl0C	111021	t	Y	2	2	37	1452	Ref[1155];A[0];T[1155];G[0];C[297]	.	.	LEFT[ pseudogene:CAGL0C01067g:104419-107905 ];RIGHT[ CDS:CAGL0C01133g:114805-117915 ]	.	.	.	.	.
706		Cagl0C	111072	*	*/-t	1498	1498	37	1318	*[1186];-t[132]	Other[0]	.	LEFT[ pseudogene:CAGL0C01067g:104419-107905 ];RIGHT[ CDS:CAGL0C01133g:114805-117915 ]	.	.	.	.	.
707		Cagl0C	111153	*	*/+T	9375	9375	37	1479	*[1144];+T[335]	Other[0]	.	LEFT[ pseudogene:CAGL0C01067g:104419-107905 ];RIGHT[ CDS:CAGL0C01133g:114805-117915 ]	.	.	.	.	.
708		Cagl0C	111167	t	Y	160	160	37	1493	Ref[1102];A[1];T[1102];G[0];C[390]	.	.	LEFT[ pseudogene:CAGL0C01067g:104419-107905 ];RIGHT[ CDS:CAGL0C01133g:114805-117915 ]	.	.	.	.	.
709		Cagl0C	111176	a	R	80	80	37	1434	Ref[1054];A[1054];T[0];G[380];C[0]	.	.	LEFT[ pseudogene:CAGL0C01067g:104419-107905 ];RIGHT[ CDS:CAGL0C01133g:114805-117915 ]	.	.	.	.	.
710		Cagl0C	111192	a	M	130	130	37	1420	Ref[1028];A[1028];T[0];G[0];C[391]	Gap[1]	.	LEFT[ pseudogene:CAGL0C01067g:104419-107905 ];RIGHT[ CDS:CAGL0C01133g:114805-117915 ]	.	.	.	.	.
711		Cagl0C	111237	a	R	194	194	37	1430	Ref[1049];A[1049];T[1];G[380];C[0]	.	.	LEFT[ pseudogene:CAGL0C01067g:104419-107905 ];RIGHT[ CDS:CAGL0C01133g:114805-117915 ]	.	.	.	.	.
712		Cagl0C	111244	a	M	168	168	37	1415	Ref[1036];A[1036];T[0];G[0];C[379]	.	.	LEFT[ pseudogene:CAGL0C01067g:104419-107905 ];RIGHT[ CDS:CAGL0C01133g:114805-117915 ]	.	.	.	.	.
713		Cagl0C	111674	g	R	228	228	37	1769	Ref[1191];A[578];T[0];G[1191];C[0]	.	.	LEFT[ pseudogene:CAGL0C01067g:104419-107905 ];RIGHT[ CDS:CAGL0C01133g:114805-117915 ]	.	.	.	.	.
714		Cagl0C	111730	t	Y	228	228	36	1707	Ref[1191];A[0];T[1191];G[0];C[516]	.	.	LEFT[ pseudogene:CAGL0C01067g:104419-107905 ];RIGHT[ CDS:CAGL0C01133g:114805-117915 ]	.	.	.	.	.
715		Cagl0C	111739	a	R	187	187	35	1653	Ref[1181];A[1181];T[0];G[472];C[0]	.	.	LEFT[ pseudogene:CAGL0C01067g:104419-107905 ];RIGHT[ CDS:CAGL0C01133g:114805-117915 ]	.	.	.	.	.
716		Cagl0C	111831	*	*/-a	6856	6856	37	1378	*[1106];-a[272]	Other[0]	.	LEFT[ pseudogene:CAGL0C01067g:104419-107905 ];RIGHT[ CDS:CAGL0C01133g:114805-117915 ]	.	.	.	.	.
717		Cagl0C	111874	a	R	186	186	37	1553	Ref[1119];A[1119];T[0];G[434];C[0]	.	.	LEFT[ pseudogene:CAGL0C01067g:104419-107905 ];RIGHT[ CDS:CAGL0C01133g:114805-117915 ]	.	.	.	.	.
718		Cagl0C	112051	a	R	228	228	37	1648	Ref[659];A[659];T[1];G[988];C[0]	.	.	LEFT[ pseudogene:CAGL0C01067g:104419-107905 ];RIGHT[ CDS:CAGL0C01133g:114805-117915 ]	.	.	.	.	.
719		Cagl0C	112130	a	M	228	228	37	1675	Ref[570];A[570];T[1];G[0];C[1104]	.	.	LEFT[ pseudogene:CAGL0C01067g:104419-107905 ];RIGHT[ CDS:CAGL0C01133g:114805-117915 ]	.	.	.	.	.
720		Cagl0C	112704	a	R	191	191	37	1477	Ref[1006];A[1006];T[0];G[471];C[0]	.	.	LEFT[ pseudogene:CAGL0C01067g:104419-107905 ];RIGHT[ CDS:CAGL0C01133g:114805-117915 ]	.	.	.	.	.
721		Cagl0C	112751	a	R	228	228	37	1545	Ref[508];A[508];T[0];G[1037];C[0]	.	.	LEFT[ pseudogene:CAGL0C01067g:104419-107905 ];RIGHT[ CDS:CAGL0C01133g:114805-117915 ]	.	.	.	.	.
722		Cagl0C	112862	c	M	192	228	37	1407	Ref[476];A[930];T[0];G[1];C[476]	.	.	LEFT[ pseudogene:CAGL0C01067g:104419-107905 ];RIGHT[ CDS:CAGL0C01133g:114805-117915 ]	.	.	.	.	.
723		Cagl0C	112919	t	Y	228	228	33	786	Ref[425];A[1];T[425];G[6];C[354]	.	.	LEFT[ pseudogene:CAGL0C01067g:104419-107905 ];RIGHT[ CDS:CAGL0C01133g:114805-117915 ]	.	.	.	.	.
724		Cagl0C	113444	a	R	225	225	32	757	Ref[514];A[514];T[0];G[243];C[0]	.	.	LEFT[ pseudogene:CAGL0C01067g:104419-107905 ];RIGHT[ CDS:CAGL0C01133g:114805-117915 ]	.	.	.	.	.
725		Cagl0C	113635	c	S	228	228	37	1128	Ref[547];A[1];T[0];G[580];C[547]	.	.	LEFT[ pseudogene:CAGL0C01067g:104419-107905 ];RIGHT[ CDS:CAGL0C01133g:114805-117915 ]	.	.	.	.	.
726		Cagl0C	113693	t	Y	228	228	34	837	Ref[552];A[0];T[552];G[0];C[285]	.	.	LEFT[ pseudogene:CAGL0C01067g:104419-107905 ];RIGHT[ CDS:CAGL0C01133g:114805-117915 ]	.	.	.	.	.
727		Cagl0C	117925	a	R	10	10	31	694	Ref[461];A[461];T[0];G[233];C[0]	.	.	LEFT[ CDS:CAGL0C01133g:114805-117915 ];RIGHT[ CDS:CAGL0C01155g:119007-119954 ]	.	.	.	.	.
728		Cagl0C	160084	*	*/-t	2356	2356	37	520	*[407];-t[74]	Other[39]	.	LEFT[ CDS:CAGL0C01441g:156930-159947 ];RIGHT[ CDS:CAGL0C01463g:160384-162501 ]	.	.	.	.	.
729		Cagl0C	276203	*	*/-t	1079	1079	37	238	*[186];-t[34]	Other[18]	.	LEFT[ CDS:CAGL0C02717g:275325-276191 ];RIGHT[ CDS:CAGL0C02739g:276663-277250 ]	.	.	.	.	.
730		Cagl0C	378938	c	A	225	225	37	524	Ref[0];A[524];T[0];G[0];C[0]	.	.	LEFT[ CDS:CAGL0C03850g:377957-378586 ];RIGHT[ CDS:CAGL0C03872g:379501-380268 ]	.	.	.	.	.
731		Cagl0C	407096	*	*/-g	847	847	36	279	*[235];-g[33]	Other[11]	.	LEFT[ CDS:CAGL0C04136g:406014-406325 ];RIGHT[ CDS:CAGL0C04169g:407265-409343 ]	.	.	.	.	.
732		Cagl0C	487740	*	*/-t	305	305	36	684	*[620];-t[42]	Other[22]	.	LEFT[ CDS:CAGL0C05115g:484897-486159 ];RIGHT[ CDS:CAGL0C05137g:487842-489110 ]	.	.	.	.	.
733		Cagl0C	514741	g	R	228	228	35	1059	Ref[660];A[398];T[1];G[660];C[0]	.	.	LEFT[ CDS:CAGL0C05379g:512277-514118 ];RIGHT[ CDS:CAGL0C05401g:515623-515886 ]	.	.	.	.	.
734		Cagl0C	514751	a	R	72	72	35	1068	Ref[839];A[839];T[0];G[229];C[0]	.	.	LEFT[ CDS:CAGL0C05379g:512277-514118 ];RIGHT[ CDS:CAGL0C05401g:515623-515886 ]	.	.	.	.	.
735		Cagl0C	525816	*	*/-c	591	591	36	331	*[298];-c[27]	Other[6]	.	LEFT[ exon:CAGL0C05467g:524591-524686 ];RIGHT[ CDS:CAGL0C05489g:528599-530836 ]	.	.	.	.	.
736		Cagl0C	552401	*	*/-at	4490	4490	27	875	*[778];-at[67]	Other[30]	.	LEFT[ CDS:CAGL0C05599g:538455-541559 ];RIGHT[ pseudogene:CAGL0C05643g:555325-557469 ]	.	.	.	.	.
737		Cagl0C	553269	*	*/-a	687	687	36	674	*[642];-a[19]	Other[13]	.	LEFT[ CDS:CAGL0C05599g:538455-541559 ];RIGHT[ pseudogene:CAGL0C05643g:555325-557469 ]	.	.	.	.	.
738		Cagl0C	553909	*	*/+A	1112	1112	35	846	*[784];+A[58]	Other[4]	.	LEFT[ CDS:CAGL0C05599g:538455-541559 ];RIGHT[ pseudogene:CAGL0C05643g:555325-557469 ]	.	.	.	.	.
739		Cagl0D	63	c	Y	13	13	35	953	Ref[737];A[0];T[216];G[0];C[737]	.	.	LEFT[ - ];RIGHT[ pseudogene:CAGL0D00110g:3088-5439 ]	.	.	.	.	.
740		Cagl0D	65	t	W	65	65	35	990	Ref[774];A[216];T[774];G[0];C[0]	.	.	LEFT[ - ];RIGHT[ pseudogene:CAGL0D00110g:3088-5439 ]	.	.	.	.	.
741		Cagl0D	89	t	Y	11	11	34	1386	Ref[1018];A[0];T[1018];G[0];C[368]	.	.	LEFT[ - ];RIGHT[ pseudogene:CAGL0D00110g:3088-5439 ]	.	.	.	.	.
742		Cagl0D	124	*	*/-ca	509	509	20	2959	*[2835];-ca[124]	Other[0]	.	LEFT[ - ];RIGHT[ pseudogene:CAGL0D00110g:3088-5439 ]	.	.	.	.	.
743		Cagl0D	268	*	*/+C	2428	2428	37	1138	*[1009];+C[129]	Other[0]	.	LEFT[ - ];RIGHT[ pseudogene:CAGL0D00110g:3088-5439 ]	.	.	.	.	.
744		Cagl0D	279	t	Y	149	149	37	1369	Ref[991];A[0];T[991];G[0];C[378]	.	.	LEFT[ - ];RIGHT[ pseudogene:CAGL0D00110g:3088-5439 ]	.	.	.	.	.
745		Cagl0D	280	c	Y	109	109	37	1410	Ref[994];A[0];T[416];G[0];C[994]	.	.	LEFT[ - ];RIGHT[ pseudogene:CAGL0D00110g:3088-5439 ]	.	.	.	.	.
746		Cagl0D	318	c	Y	228	228	35	2332	Ref[1143];A[1];T[1188];G[0];C[1143]	.	.	LEFT[ - ];RIGHT[ pseudogene:CAGL0D00110g:3088-5439 ]	.	.	.	.	.
747		Cagl0D	343	c	Y	228	228	34	2584	Ref[1258];A[0];T[1326];G[0];C[1258]	.	.	LEFT[ - ];RIGHT[ pseudogene:CAGL0D00110g:3088-5439 ]	.	.	.	.	.
748		Cagl0D	384	a	R	21	21	34	2210	Ref[1683];A[1683];T[1];G[526];C[0]	.	.	LEFT[ - ];RIGHT[ pseudogene:CAGL0D00110g:3088-5439 ]	.	.	.	.	.
749		Cagl0D	394	a	W	228	228	34	1806	Ref[1016];A[1016];T[500];G[290];C[0]	.	.	LEFT[ - ];RIGHT[ pseudogene:CAGL0D00110g:3088-5439 ]	.	.	.	.	.
750		Cagl0D	408	t	W	50	50	36	1361	Ref[1107];A[253];T[1107];G[1];C[0]	.	.	LEFT[ - ];RIGHT[ pseudogene:CAGL0D00110g:3088-5439 ]	.	.	.	.	.
751		Cagl0D	420	*	*/+G	6089	6089	36	1331	*[1078];+G[253]	Other[0]	.	LEFT[ - ];RIGHT[ pseudogene:CAGL0D00110g:3088-5439 ]	.	.	.	.	.
752		Cagl0D	835	*	*/-c	2321	2321	29	1107	*[965];-c[142]	Other[0]	.	LEFT[ - ];RIGHT[ pseudogene:CAGL0D00110g:3088-5439 ]	.	.	.	.	.
753		Cagl0D	947	t	Y	17	17	35	1268	Ref[1050];A[1];T[1050];G[0];C[217]	.	.	LEFT[ - ];RIGHT[ pseudogene:CAGL0D00110g:3088-5439 ]	.	.	.	.	.
754		Cagl0D	1135	t	K	96	96	30	1563	Ref[1036];A[2];T[1036];G[262];C[263]	.	.	LEFT[ - ];RIGHT[ pseudogene:CAGL0D00110g:3088-5439 ]	.	.	.	.	.
755		Cagl0D	1478	t	W	68	68	31	1364	Ref[926];A[438];T[926];G[0];C[0]	.	.	LEFT[ - ];RIGHT[ pseudogene:CAGL0D00110g:3088-5439 ]	.	.	.	.	.
756		Cagl0D	1514	t	Y	112	112	32	1644	Ref[1093];A[0];T[1093];G[0];C[551]	.	.	LEFT[ - ];RIGHT[ pseudogene:CAGL0D00110g:3088-5439 ]	.	.	.	.	.
757		Cagl0D	1569	c	M	150	150	34	2012	Ref[1322];A[690];T[0];G[0];C[1322]	.	.	LEFT[ - ];RIGHT[ pseudogene:CAGL0D00110g:3088-5439 ]	.	.	.	.	.
758		Cagl0D	1577	c	Y	223	223	33	2019	Ref[1285];A[0];T[734];G[0];C[1285]	.	.	LEFT[ - ];RIGHT[ pseudogene:CAGL0D00110g:3088-5439 ]	.	.	.	.	.
759		Cagl0D	1581	a	W	228	228	33	2044	Ref[1274];A[1274];T[770];G[0];C[0]	.	.	LEFT[ - ];RIGHT[ pseudogene:CAGL0D00110g:3088-5439 ]	.	.	.	.	.
760		Cagl0D	1590	t	Y	217	217	32	2052	Ref[1219];A[1];T[1219];G[0];C[832]	.	.	LEFT[ - ];RIGHT[ pseudogene:CAGL0D00110g:3088-5439 ]	.	.	.	.	.
761		Cagl0D	2302	t	Y	228	228	31	1220	Ref[800];A[0];T[800];G[0];C[420]	.	.	LEFT[ - ];RIGHT[ pseudogene:CAGL0D00110g:3088-5439 ]	.	.	.	.	.
762		Cagl0D	2498	t	Y	30	30	31	1058	Ref[812];A[0];T[812];G[0];C[246]	.	.	LEFT[ - ];RIGHT[ pseudogene:CAGL0D00110g:3088-5439 ]	.	.	.	.	.
763		Cagl0D	2756	g	K	228	228	35	1631	Ref[874];A[0];T[757];G[874];C[0]	.	.	LEFT[ - ];RIGHT[ pseudogene:CAGL0D00110g:3088-5439 ]	.	.	.	.	.
764		Cagl0D	23385	*	*/-a	1264	1264	37	655	*[518];-a[59]	Other[78]	.	LEFT[ CDS:CAGL0D00154g:17042-17914 ];RIGHT[ CDS:CAGL0D00176g:23693-25075 ]	.	.	.	.	.
765		Cagl0D	50700	a	R	4	4	36	51	Ref[43];A[43];T[0];G[7];C[0]	+G[2];Gap[1];-G[1];-GGG[1]	.	LEFT[ CDS:CAGL0D00418g:47786-50011 ];RIGHT[ CDS:CAGL0D00440g:52244-52798 ]	.	.	.	.	.
766		Cagl0D	54577	*	*/-a	103	103	37	568	*[504];-a[35]	Other[29]	.	LEFT[ CDS:CAGL0D00440g:52244-52798 ];RIGHT[ CDS:CAGL0D00462g:55305-57443 ]	.	.	.	.	.
767		Cagl0D	354792	*	*/-t	2444	2444	37	310	*[221];-t[50]	Other[39]	.	LEFT[ CDS:CAGL0D03432g:353289-354491 ];RIGHT[ CDS:CAGL0D03454g:355262-356368 ]	.	.	.	.	.
768		Cagl0D	378923	*	*/-g	411	411	37	355	*[314];-g[31]	Other[10]	.	LEFT[ CDS:CAGL0D03740g:376920-377804 ];RIGHT[ CDS:CAGL0D03762g:380418-381356 ]	.	.	.	.	.
769		Cagl0D	520766	*	-g/-g	522	15057	37	468	-g[357];-gg[21]	Other[90]	.	LEFT[ CDS:CAGL0D05434g:518042-518767 ];RIGHT[ CDS:CAGL0D05456g:521445-522071 ]	.	.	.	.	.
770		Cagl0D	522128	t	Y	28	28	36	28	Ref[22];A[0];T[22];G[0];C[6]	.	.	LEFT[ CDS:CAGL0D05456g:521445-522071 ];RIGHT[ CDS:CAGL0D05478g:522559-524733 ]	.	.	.	.	.
771		Cagl0D	604598	*	*/-ca	712	712	37	911	*[876];-ca[31]	Other[4]	.	LEFT[ CDS:CAGL0D06402g:602973-604301 ];RIGHT[ CDS:CAGL0D06424g:605107-607440 ]	.	.	.	.	.
772		Cagl0D	614844	*	*/-t	879	879	36	433	*[373];-t[37]	Other[23]	.	LEFT[ CDS:CAGL0D06446g:608505-614213 ];RIGHT[ CDS:CAGL0D06468g:615364-615927 ]	.	.	.	.	.
773		Cagl0D	621768	*	+C/+C	122	82	37	63	+C[1];*[62]	Other[0]	.	LEFT[ CDS:CAGL0D06512g:617453-621379 ];RIGHT[ CDS:CAGL0D06534g:622178-622492 ]	.	.	.	.	.
774		Cagl0D	625923	*	*/-c	131	131	36	183	*[171];-c[11]	Other[1]	.	LEFT[ CDS:CAGL0D06578g:625655-625915 ];RIGHT[ CDS:CAGL0D06600g:626571-628748 ]	.	.	.	.	.
775		Cagl0D	648628	*	*/-g	1178	1178	37	492	*[439];-g[48]	Other[5]	.	LEFT[ CDS:CAGL0D06710g:641982-643127 ];RIGHT[ pseudogene:CAGL0D06732g:649483-651699 ]	.	.	.	.	.
776		Cagl0E	122	*	*/-t	1499	1499	18	1141	*[1032];-t[109]	Other[0]	.	LEFT[ - ];RIGHT[ pseudogene:CAGL0E00110g:1440-6420 ]	.	.	.	.	.
777		Cagl0E	666	a	R	62	62	27	1276	Ref[948];A[948];T[0];G[328];C[0]	.	.	LEFT[ - ];RIGHT[ pseudogene:CAGL0E00110g:1440-6420 ]	.	.	.	.	.
778		Cagl0E	671	c	Y	187	187	27	1309	Ref[933];A[0];T[376];G[0];C[933]	.	.	LEFT[ - ];RIGHT[ pseudogene:CAGL0E00110g:1440-6420 ]	.	.	.	.	.
779		Cagl0E	779	t	K	228	228	37	1295	Ref[764];A[0];T[764];G[531];C[0]	.	.	LEFT[ - ];RIGHT[ pseudogene:CAGL0E00110g:1440-6420 ]	.	.	.	.	.
780		Cagl0E	1124	*	*/-t	7459	7459	37	1105	*[875];-t[230]	Other[0]	.	LEFT[ - ];RIGHT[ pseudogene:CAGL0E00110g:1440-6420 ]	.	.	.	.	.
781		Cagl0E	1152	g	K	228	228	37	1279	Ref[833];A[0];T[446];G[833];C[0]	.	.	LEFT[ - ];RIGHT[ pseudogene:CAGL0E00110g:1440-6420 ]	.	.	.	.	.
782		Cagl0E	1294	*	*/-t	345	345	35	1052	*[1019];-t[31]	Other[2]	.	LEFT[ - ];RIGHT[ pseudogene:CAGL0E00110g:1440-6420 ]	.	.	.	.	.
783		Cagl0E	205687	*	*/-tg	440	440	37	470	*[447];-tg[19]	Other[4]	.	LEFT[ CDS:CAGL0E02057g:203578-205509 ];RIGHT[ CDS:CAGL0E02079g:207187-208575 ]	.	.	.	.	.
784		Cagl0E	224929	*	*/-t	134	134	36	59	*[55];-t[4]	Other[0]	.	LEFT[ CDS:CAGL0E02321g:222703-224817 ];RIGHT[ CDS:CAGL0E02343g:225336-226430 ]	.	.	.	.	.
785		Cagl0E	258774	*	*/-t	24	24	37	434	*[400];-t[23]	Other[11]	.	LEFT[ CDS:CAGL0E02717g:257708-258685 ];RIGHT[ CDS:CAGL0E02739g:259023-260054 ]	.	.	.	.	.
786		Cagl0E	341077	*	*/-t	357	357	36	179	*[166];-t[1]	Other[12]	.	LEFT[ CDS:CAGL0E03630g:335328-337568 ];RIGHT[ CDS:CAGL0E03652g:341431-342099 ]	.	.	.	.	.
787		Cagl0E	376148	*	*/-tc	501	501	37	403	*[384];-tc[18]	Other[1]	.	LEFT[ CDS:CAGL0E03938g:374210-374980 ];RIGHT[ CDS:CAGL0E03960g:376571-377464 ]	.	.	.	.	.
788		Cagl0E	464055	*	+A/*	18714	72617	33	2030	+A[2];*[2028]	Other[0]	.	LEFT[ CDS:CAGL0E04818g:462438-463712 ];RIGHT[ CDS:CAGL0E04840g:464344-465546 ]	.	.	.	.	.
789		Cagl0E	464079	t	W	1	147	33	2589	Ref[595];A[1993];T[595];G[1];C[0]	.	.	LEFT[ CDS:CAGL0E04818g:462438-463712 ];RIGHT[ CDS:CAGL0E04840g:464344-465546 ]	.	.	.	.	.
790		Cagl0E	483586	*	*/-t	2	2	37	435	*[394];-t[28]	Other[13]	.	LEFT[ CDS:CAGL0E04972g:480915-482930 ];RIGHT[ CDS:CAGL0E04994g:484427-485002 ]	.	.	.	.	.
791		Cagl0E	486844	*	*/-a	178	178	37	594	*[540];-a[38]	Other[16]	.	LEFT[ CDS:CAGL0E05016g:485522-486652 ];RIGHT[ CDS:CAGL0E05038g:488786-493240 ]	.	.	.	.	.
792		Cagl0E	487037	*	*/-c	1495	1495	36	280	*[228];-c[44]	Other[8]	.	LEFT[ CDS:CAGL0E05016g:485522-486652 ];RIGHT[ CDS:CAGL0E05038g:488786-493240 ]	.	.	.	.	.
793		Cagl0E	535734	*	+A/*	118	225	37	166	+A[2];*[164]	Other[0]	.	LEFT[ CDS:CAGL0E05434g:532814-535264 ];RIGHT[ CDS:CAGL0E05456g:536135-537091 ]	.	.	.	.	.
794		Cagl0E	620768	*	*/-a	1278	1278	37	572	*[493];-a[53]	Other[26]	.	LEFT[ CDS:CAGL0E06160g:619492-620340 ];RIGHT[ CDS:CAGL0E06182g:621285-621926 ]	.	.	.	.	.
795		Cagl0E	664344	*	*/-t	979	979	37	628	*[543];-t[45]	Other[40]	.	LEFT[ CDS:CAGL0E06600g:658435-661332 ];RIGHT[ CDS:CAGL0E06644g:665110-668214 ]	.	.	.	.	.
796		Cagl0F	249	g	K	39	39	34	1404	Ref[1069];A[0];T[335];G[1069];C[0]	-C[1]	.	LEFT[ - ];RIGHT[ pseudogene:CAGL0F00110g:1241-4796 ]	.	.	.	.	.
797		Cagl0F	261	t	Y	2	2	34	1465	Ref[1098];A[1];T[1098];G[0];C[366]	.	.	LEFT[ - ];RIGHT[ pseudogene:CAGL0F00110g:1241-4796 ]	.	.	.	.	.
798		Cagl0F	269	g	R	0	0	34	1516	Ref[1101];A[415];T[0];G[1101];C[0]	.	.	LEFT[ - ];RIGHT[ pseudogene:CAGL0F00110g:1241-4796 ]	.	.	.	.	.
799		Cagl0F	1016	g	S	188	188	28	1641	Ref[1125];A[0];T[0];G[1125];C[516]	.	.	LEFT[ - ];RIGHT[ pseudogene:CAGL0F00110g:1241-4796 ]	.	.	.	.	.
800		Cagl0F	1062	t	W	228	228	36	1342	Ref[874];A[466];T[874];G[2];C[0]	.	.	LEFT[ - ];RIGHT[ pseudogene:CAGL0F00110g:1241-4796 ]	.	.	.	.	.
801		Cagl0F	1110	*	*/+G	6472	6472	34	1169	*[978];+G[191]	Other[0]	.	LEFT[ - ];RIGHT[ pseudogene:CAGL0F00110g:1241-4796 ]	.	.	.	.	.
802		Cagl0F	61900	*	*/-g	628	628	36	327	*[288];-g[35]	Other[4]	.	LEFT[ CDS:CAGL0F00583g:59518-60636 ];RIGHT[ CDS:CAGL0F00605g:63354-64841 ]	.	.	.	.	.
803		Cagl0F	65480	*	*/-a	100	100	37	674	*[603];-a[47]	Other[24]	.	LEFT[ CDS:CAGL0F00605g:63354-64841 ];RIGHT[ CDS:CAGL0F00627g:65516-67393 ]	.	.	.	.	.
804		Cagl0F	153461	*	*/-a	578	578	36	148	*[135];-a[13]	Other[0]	.	LEFT[ CDS:CAGL0F01485g:151321-152334 ];RIGHT[ CDS:CAGL0F01507g:153593-154864 ]	.	.	.	.	.
805		Cagl0F	178820	*	*/-t	1023	1023	37	405	*[336];-t[36]	Other[33]	.	LEFT[ CDS:CAGL0F01793g:177696-178790 ];RIGHT[ CDS:CAGL0F01815g:179470-180414 ]	.	.	.	.	.
806		Cagl0F	233916	*	*/-a	325	325	37	599	*[590];-a[9]	Other[0]	.	LEFT[ tRNA:CAGL0F02409r:233357-233429 ];RIGHT[ CDS:CAGL0F02431g:234061-236418 ]	.	.	.	.	.
807		Cagl0F	289776	*	*/-a	166	166	37	519	*[466];-a[27]	Other[26]	.	LEFT[ tRNA:CAGL0F02981r:288415-288496 ];RIGHT[ CDS:CAGL0F03003g:289923-293480 ]	.	.	.	.	.
808		Cagl0F	289865	*	*/-c	1321	1321	37	269	*[225];-c[44]	Other[0]	.	LEFT[ tRNA:CAGL0F02981r:288415-288496 ];RIGHT[ CDS:CAGL0F03003g:289923-293480 ]	.	.	.	.	.
809		Cagl0F	390655	*	*/-at	2207	2207	37	437	*[390];-at[41]	Other[6]	.	LEFT[ CDS:CAGL0F03971g:386224-390591 ];RIGHT[ CDS:CAGL0F03993g:390873-392219 ]	.	.	.	.	.
810		Cagl0F	392267	*	*/-t	687	687	37	319	*[274];-t[33]	Other[12]	.	LEFT[ CDS:CAGL0F03993g:390873-392219 ];RIGHT[ CDS:CAGL0F04015g:392293-393825 ]	.	.	.	.	.
811		Cagl0F	396442	*	*/-t	373	373	37	433	*[383];-t[32]	Other[18]	.	LEFT[ CDS:CAGL0F04015g:392293-393825 ];RIGHT[ CDS:CAGL0F04081g:406151-407998 ]	.	.	.	.	.
812		Cagl0F	404106	*	-cc/*	42	63	37	17	-cc[1];*[16]	Other[0]	.	LEFT[ CDS:CAGL0F04015g:392293-393825 ];RIGHT[ CDS:CAGL0F04081g:406151-407998 ]	.	.	.	.	.
813		Cagl0F	406111	*	*/-a	689	689	37	411	*[348];-a[41]	Other[22]	.	LEFT[ CDS:CAGL0F04015g:392293-393825 ];RIGHT[ CDS:CAGL0F04081g:406151-407998 ]	.	.	.	.	.
814		Cagl0F	408238	*	*/-t	811	811	37	424	*[341];-t[45]	Other[38]	.	LEFT[ CDS:CAGL0F04081g:406151-407998 ];RIGHT[ CDS:CAGL0F04103g:410151-410486 ]	.	.	.	.	.
815		Cagl0F	413282	*	*/-tg	2140	2140	37	462	*[426];-tg[29]	Other[7]	.	LEFT[ CDS:CAGL0F04125g:411161-412378 ];RIGHT[ CDS:CAGL0F04191g:417993-418265 ]	.	.	.	.	.
816		Cagl0F	415882	*	*/-c	467	467	36	230	*[210];-c[17]	Other[3]	.	LEFT[ CDS:CAGL0F04125g:411161-412378 ];RIGHT[ CDS:CAGL0F04191g:417993-418265 ]	.	.	.	.	.
817		Cagl0F	455000	t	K	27	27	36	60	Ref[26];A[0];T[26];G[31];C[2]	Gap[1]	.	LEFT[ CDS:CAGL0F04521g:453083-453943 ];RIGHT[ CDS:CAGL0F04543g:456591-456866 ]	.	.	.	.	.
818		Cagl0F	477885	*	*/-g	1217	1217	36	166	*[133];-g[23]	Other[10]	.	LEFT[ CDS:CAGL0F04719g:475180-477294 ];RIGHT[ CDS:CAGL0F04741g:478256-479584 ]	.	.	.	.	.
819		Cagl0F	495113	t	K	19	19	37	29	Ref[20];A[0];T[20];G[8];C[0]	Gap[1]	.	LEFT[ CDS:CAGL0F04873g:491732-493813 ];RIGHT[ CDS:CAGL0F04895g:495596-498295 ]	.	.	.	.	.
820		Cagl0F	524844	*	*/-a	262	262	37	423	*[384];-a[30]	Other[9]	.	LEFT[ CDS:CAGL0F05137g:523941-524624 ];RIGHT[ CDS:CAGL0F05159g:525230-527617 ]	.	.	.	.	.
821		Cagl0F	547710	*	*/-t	247	247	37	392	*[349];-t[27]	Other[16]	.	LEFT[ CDS:CAGL0F05379g:544091-547162 ];RIGHT[ CDS:CAGL0F05401g:547875-550430 ]	.	.	.	.	.
822		Cagl0F	586422	*	-g/-g	1352	16148	37	438	-g[360];*[78]	Other[0]	.	LEFT[ CDS:CAGL0F05819g:584882-586189 ];RIGHT[ CDS:CAGL0F05841g:586441-586881 ]	.	.	.	.	.
823		Cagl0F	598404	*	*/-a	445	445	37	337	*[289];-a[26]	Other[22]	.	LEFT[ CDS:CAGL0F05973g:595752-597353 ];RIGHT[ CDS:CAGL0F05995g:598819-600612 ]	.	.	.	.	.
824		Cagl0F	730976	*	+C/+C	1394	18181	37	512	+C[432];+CC[1]	Other[79]	.	LEFT[ CDS:CAGL0F07513g:729306-730505 ];RIGHT[ CDS:CAGL0F07535g:731456-732397 ]	.	.	.	.	.
825		Cagl0F	782121	*	*/-a	1390	1390	37	445	*[370];-a[53]	Other[22]	.	LEFT[ CDS:CAGL0F07953g:781219-781509 ];RIGHT[ CDS:CAGL0F07975g:782229-784541 ]	.	.	.	.	.
826		Cagl0F	834674	*	*/-a	388	388	37	615	*[542];-a[49]	Other[24]	.	LEFT[ tRNA:CAGL0F08349r:832602-832674 ];RIGHT[ CDS:CAGL0F08371g:835733-837322 ]	.	.	.	.	.
827		Cagl0F	866624	*	*/-g	879	879	36	162	*[134];-g[26]	Other[2]	.	LEFT[ CDS:CAGL0F08745g:866073-866333 ];RIGHT[ CDS:CAGL0F08767g:867394-867789 ]	.	.	.	.	.
828		Cagl0F	897093	*	*/-t	753	753	37	823	*[719];-t[58]	Other[46]	.	LEFT[ CDS:CAGL0F09075g:894761-897001 ];RIGHT[ CDS:CAGL0F09097g:898706-900598 ]	.	.	.	.	.
829		Cagl0F	926524	*	-t/-t	2813	35573	37	925	-t[810];*[115]	Other[0]	.	LEFT[ CDS:CAGL0F09273g:925942-926406 ];RIGHT[ - ]	.	.	.	.	.
830		Cagl0F	926725	*	-t/-t	2819	36295	37	927	-t[824];*[103]	Other[0]	.	LEFT[ CDS:CAGL0F09273g:925942-926406 ];RIGHT[ - ]	.	.	.	.	.
831		Cagl0G	38	g	R	162	162	32	1097	Ref[643];A[454];T[0];G[643];C[0]	.	.	LEFT[ - ];RIGHT[ pseudogene:CAGL0G00110g:2726-5683 ]	.	.	.	.	.
832		Cagl0G	84	c	M	33	33	32	3017	Ref[2226];A[790];T[0];G[1];C[2226]	.	.	LEFT[ - ];RIGHT[ pseudogene:CAGL0G00110g:2726-5683 ]	.	.	.	.	.
833		Cagl0G	261	c	M	228	228	36	3067	Ref[1233];A[1817];T[10];G[0];C[1233]	Gap[7]	.	LEFT[ - ];RIGHT[ pseudogene:CAGL0G00110g:2726-5683 ]	.	.	.	.	.
834		Cagl0G	315	a	R	56	56	36	2714	Ref[2137];A[2137];T[2];G[575];C[0]	.	.	LEFT[ - ];RIGHT[ pseudogene:CAGL0G00110g:2726-5683 ]	.	.	.	.	.
835		Cagl0G	319	t	W	1	1	36	2673	Ref[2178];A[495];T[2178];G[0];C[0]	.	.	LEFT[ - ];RIGHT[ pseudogene:CAGL0G00110g:2726-5683 ]	.	.	.	.	.
836		Cagl0G	347	*	*/+A	12314	12314	37	3093	*[2588];+A[505]	Other[0]	.	LEFT[ - ];RIGHT[ pseudogene:CAGL0G00110g:2726-5683 ]	.	.	.	.	.
837		Cagl0G	402	*	*/-ca	10970	10970	28	4736	*[4393];-ca[343]	Other[0]	.	LEFT[ - ];RIGHT[ pseudogene:CAGL0G00110g:2726-5683 ]	.	.	.	.	.
838		Cagl0G	445	c	Y	228	228	25	4899	Ref[2373];A[1];T[2524];G[1];C[2373]	.	.	LEFT[ - ];RIGHT[ pseudogene:CAGL0G00110g:2726-5683 ]	.	.	.	.	.
839		Cagl0G	448	g	S	115	115	25	4873	Ref[3682];A[1];T[0];G[3682];C[1190]	.	.	LEFT[ - ];RIGHT[ pseudogene:CAGL0G00110g:2726-5683 ]	.	.	.	.	.
840		Cagl0G	533	t	Y	228	228	35	3536	Ref[1821];A[1];T[1821];G[0];C[1714]	.	.	LEFT[ - ];RIGHT[ pseudogene:CAGL0G00110g:2726-5683 ]	.	.	.	.	.
841		Cagl0G	538	g	R	228	228	35	3478	Ref[1938];A[1540];T[0];G[1938];C[0]	-A[1]	.	LEFT[ - ];RIGHT[ pseudogene:CAGL0G00110g:2726-5683 ]	.	.	.	.	.
842		Cagl0G	545	t	Y	150	228	35	3472	Ref[881];A[0];T[881];G[0];C[2591]	.	.	LEFT[ - ];RIGHT[ pseudogene:CAGL0G00110g:2726-5683 ]	.	.	.	.	.
843		Cagl0G	623	a	R	173	173	35	3413	Ref[2613];A[2613];T[0];G[800];C[0]	.	.	LEFT[ - ];RIGHT[ pseudogene:CAGL0G00110g:2726-5683 ]	.	.	.	.	.
844		Cagl0G	676	c	Y	82	82	27	2645	Ref[1958];A[1];T[686];G[0];C[1958]	.	.	LEFT[ - ];RIGHT[ pseudogene:CAGL0G00110g:2726-5683 ]	.	.	.	.	.
845		Cagl0G	1023	*	+A/+A	2855	36742	37	939	+A[838];*[101]	Other[0]	.	LEFT[ - ];RIGHT[ pseudogene:CAGL0G00110g:2726-5683 ]	.	.	.	.	.
846		Cagl0G	1394	*	*/-t	3141	3141	26	1047	*[889];-t[158]	Other[0]	.	LEFT[ - ];RIGHT[ pseudogene:CAGL0G00110g:2726-5683 ]	.	.	.	.	.
847		Cagl0G	1529	t	Y	175	175	35	987	Ref[713];A[1];T[713];G[0];C[273]	.	.	LEFT[ - ];RIGHT[ pseudogene:CAGL0G00110g:2726-5683 ]	.	.	.	.	.
848		Cagl0G	2373	t	K	228	228	33	1088	Ref[719];A[0];T[719];G[369];C[0]	.	.	LEFT[ - ];RIGHT[ pseudogene:CAGL0G00110g:2726-5683 ]	.	.	.	.	.
849		Cagl0G	2388	g	R	228	228	34	1173	Ref[722];A[451];T[0];G[722];C[0]	.	.	LEFT[ - ];RIGHT[ pseudogene:CAGL0G00110g:2726-5683 ]	.	.	.	.	.
850		Cagl0G	2410	a	R	208	208	33	1189	Ref[739];A[739];T[0];G[450];C[0]	.	.	LEFT[ - ];RIGHT[ pseudogene:CAGL0G00110g:2726-5683 ]	.	.	.	.	.
851		Cagl0G	2419	g	K	200	200	33	1139	Ref[733];A[0];T[406];G[733];C[0]	.	.	LEFT[ - ];RIGHT[ pseudogene:CAGL0G00110g:2726-5683 ]	.	.	.	.	.
852		Cagl0G	11106	*	*/-ta	1729	1729	37	481	*[456];-ta[10]	Other[15]	.	LEFT[ pseudogene:CAGL0G00110g:2726-5683 ];RIGHT[ CDS:CAGL0G00154g:14591-15892 ]	.	.	.	.	.
853		Cagl0G	11148	*	*/-tc	564	564	36	438	*[434];-tc[4]	Other[0]	.	LEFT[ pseudogene:CAGL0G00110g:2726-5683 ];RIGHT[ CDS:CAGL0G00154g:14591-15892 ]	.	.	.	.	.
854		Cagl0G	18380	*	*/-t	313	313	36	130	*[121];-t[9]	Other[0]	.	LEFT[ CDS:CAGL0G00176g:16581-17540 ];RIGHT[ CDS:CAGL0G00220g:18798-19724 ]	.	.	.	.	.
855		Cagl0G	25892	*	*/-a	1585	1585	37	618	*[494];-a[71]	Other[53]	.	LEFT[ CDS:CAGL0G00242g:20428-24861 ];RIGHT[ CDS:CAGL0G00264g:26046-26912 ]	.	.	.	.	.
856		Cagl0G	30215	*	*/-g	100	100	37	458	*[422];-g[28]	Other[8]	.	LEFT[ CDS:CAGL0G00286g:27239-28918 ];RIGHT[ CDS:CAGL0G00308g:32751-33875 ]	.	.	.	.	.
857		Cagl0G	167354	*	*/-t	1506	1506	37	296	*[232];-t[32]	Other[32]	.	LEFT[ CDS:CAGL0G01804g:166048-166908 ];RIGHT[ CDS:CAGL0G01826g:167536-168060 ]	.	.	.	.	.
858		Cagl0G	220637	*	*/-t	121	121	37	187	*[174];-t[13]	Other[0]	.	LEFT[ CDS:CAGL0G02453g:218003-219796 ];RIGHT[ exon:CAGL0G02475g:220990-221368 ]	.	.	.	.	.
859		Cagl0G	252230	*	*/-t	78	78	36	56	*[52];-t[4]	Other[0]	.	LEFT[ CDS:CAGL0G02717g:249013-250560 ];RIGHT[ CDS:CAGL0G02739g:252478-254559 ]	.	.	.	.	.
860		Cagl0G	310816	*	*/+A	47	47	37	361	*[321];+A[25]	Other[15]	.	LEFT[ CDS:CAGL0G03267g:308963-310240 ];RIGHT[ CDS:CAGL0G03289g:312871-314814 ]	.	.	.	.	.
861		Cagl0G	339538	*	*/-t	1944	1944	36	327	*[260];-t[45]	Other[22]	.	LEFT[ CDS:CAGL0G03487g:337133-339247 ];RIGHT[ CDS:CAGL0G03509g:340079-342835 ]	.	.	.	.	.
862		Cagl0G	371741	*	*/-t	191	191	36	171	*[159];-t[12]	Other[0]	.	LEFT[ CDS:CAGL0G03905g:370798-371550 ];RIGHT[ CDS:CAGL0G03927g:372896-374599 ]	.	.	.	.	.
863		Cagl0G	402260	a	G	225	225	37	488	Ref[0];A[0];T[0];G[488];C[0]	.	.	LEFT[ CDS:CAGL0G04213g:400977-401984 ];RIGHT[ tRNA:CAGL0G04235r:402836-402954 ]	.	.	.	.	.
864		Cagl0G	411125	*	*/-ct	467	467	37	244	*[243];-ct[1]	Other[0]	.	LEFT[ CDS:CAGL0G04345g:408842-410977 ];RIGHT[ CDS:CAGL0G04367g:411500-413152 ]	.	.	.	.	.
865		Cagl0G	432907	*	*/-at	410	410	37	448	*[429];-at[18]	Other[1]	.	LEFT[ CDS:CAGL0G04521g:432221-432661 ];RIGHT[ CDS:CAGL0G04543g:432932-433615 ]	.	.	.	.	.
866		Cagl0G	440991	*	*/-a	1480	1480	36	351	*[292];-a[42]	Other[17]	.	LEFT[ CDS:CAGL0G04609g:437162-440059 ];RIGHT[ CDS:CAGL0G04631g:441149-442099 ]	.	.	.	.	.
867		Cagl0G	448035	*	*/-g	860	860	36	136	*[108];-g[23]	Other[5]	.	LEFT[ CDS:CAGL0G04697g:444732-447584 ];RIGHT[ CDS:CAGL0G04719g:448089-450968 ]	.	.	.	.	.
868		Cagl0G	458946	*	*/-tg	553	553	37	467	*[443];-tg[21]	Other[3]	.	LEFT[ CDS:CAGL0G04807g:458085-458822 ];RIGHT[ CDS:CAGL0G04829g:459677-462151 ]	.	.	.	.	.
869		Cagl0G	482854	*	*/-g	895	895	36	91	*[67];-g[19]	Other[5]	.	LEFT[ CDS:CAGL0G05071g:480906-482603 ];RIGHT[ CDS:CAGL0G05093g:483230-484864 ]	.	.	.	.	.
870		Cagl0G	614197	*	*/-t	123	123	37	317	*[259];-t[22]	Other[36]	.	LEFT[ CDS:CAGL0G06358g:612827-613168 ];RIGHT[ CDS:CAGL0G06380g:615498-617417 ]	.	.	.	.	.
871		Cagl0G	642404	*	*/-t	491	491	37	410	*[354];-t[26]	Other[30]	.	LEFT[ CDS:CAGL0G06688g:640320-642332 ];RIGHT[ CDS:CAGL0G06710g:642819-643070 ]	.	.	.	.	.
872		Cagl0G	686224	*	*/-g	100	100	37	304	*[279];-g[23]	Other[2]	.	LEFT[ exon:CAGL0G07205g:684995-685831 ];RIGHT[ exon:CAGL0G07227g:686787-686836 ]	.	.	.	.	.
873		Cagl0G	727641	*	*/-c	289	289	37	172	*[155];-c[13]	Other[4]	.	LEFT[ CDS:CAGL0G07645g:725259-725540 ];RIGHT[ CDS:CAGL0G07667g:728351-729127 ]	.	.	.	.	.
874		Cagl0G	776196	*	*/-c	115	115	37	194	*[180];-c[12]	Other[2]	.	LEFT[ CDS:CAGL0G08151g:775053-775835 ];RIGHT[ CDS:CAGL0G08173g:776549-777007 ]	.	.	.	.	.
875		Cagl0G	807977	*	*/-a	1444	1444	36	344	*[285];-a[41]	Other[18]	.	LEFT[ CDS:CAGL0G08558g:804969-805652 ];RIGHT[ CDS:CAGL0G08602g:808355-811147 ]	.	.	.	.	.
876		Cagl0G	895451	*	*/-g	48	48	36	305	*[285];-g[18]	Other[2]	.	LEFT[ CDS:CAGL0G09361g:893614-894903 ];RIGHT[ CDS:CAGL0G09383g:896159-897157 ]	.	.	.	.	.
877		Cagl0G	917045	*	*/-g	1363	1363	36	310	*[273];-g[26]	Other[11]	.	LEFT[ CDS:CAGL0G09581g:915515-916813 ];RIGHT[ CDS:CAGL0G09603g:917738-918130 ]	.	.	.	.	.
878		Cagl0G	969593	*	*/-a	56	56	36	497	*[462];-a[20]	Other[15]	.	LEFT[ CDS:CAGL0G10109g:967161-969161 ];RIGHT[ CDS:CAGL0G10131g:970915-972009 ]	.	.	.	.	.
879		Cagl0G	972573	*	*/-ta	1355	1355	37	740	*[675];-ta[37]	Other[28]	.	LEFT[ CDS:CAGL0G10131g:970915-972009 ];RIGHT[ CDS:CAGL0G10153g:973396-973782 ]	.	.	.	.	.
880		Cagl0H	1	c	S	57	57	37	11	Ref[7];A[0];T[0];G[4];C[7]	.	.	LEFT[ - ];RIGHT[ CDS:CAGL0H00110g:2611-3711 ]	.	.	.	.	.
881		Cagl0H	20	c	Y	92	92	37	588	Ref[466];A[0];T[122];G[0];C[466]	.	.	LEFT[ - ];RIGHT[ CDS:CAGL0H00110g:2611-3711 ]	.	.	.	.	.
882		Cagl0H	21	g	R	56	56	37	635	Ref[487];A[148];T[0];G[487];C[0]	.	.	LEFT[ - ];RIGHT[ CDS:CAGL0H00110g:2611-3711 ]	.	.	.	.	.
883		Cagl0H	87	t	W	63	63	37	3599	Ref[2817];A[781];T[2817];G[0];C[1]	.	.	LEFT[ - ];RIGHT[ CDS:CAGL0H00110g:2611-3711 ]	.	.	.	.	.
884		Cagl0H	129	c	M	46	46	37	5021	Ref[4036];A[984];T[1];G[0];C[4036]	.	.	LEFT[ - ];RIGHT[ CDS:CAGL0H00110g:2611-3711 ]	.	.	.	.	.
885		Cagl0H	141	g	R	1	1	37	5101	Ref[4090];A[1011];T[0];G[4090];C[0]	.	.	LEFT[ - ];RIGHT[ CDS:CAGL0H00110g:2611-3711 ]	.	.	.	.	.
886		Cagl0H	146	c	Y	76	76	37	5128	Ref[4126];A[0];T[1002];G[0];C[4126]	.	.	LEFT[ - ];RIGHT[ CDS:CAGL0H00110g:2611-3711 ]	.	.	.	.	.
887		Cagl0H	160	t	Y	55	55	37	5173	Ref[4204];A[2];T[4204];G[1];C[966]	.	.	LEFT[ - ];RIGHT[ CDS:CAGL0H00110g:2611-3711 ]	.	.	.	.	.
888		Cagl0H	177	g	R	228	228	37	5263	Ref[2549];A[2712];T[1];G[2549];C[1]	.	.	LEFT[ - ];RIGHT[ CDS:CAGL0H00110g:2611-3711 ]	.	.	.	.	.
889		Cagl0H	324	g	R	224	224	37	4674	Ref[2903];A[1771];T[0];G[2903];C[0]	.	.	LEFT[ - ];RIGHT[ CDS:CAGL0H00110g:2611-3711 ]	.	.	.	.	.
890		Cagl0H	344	c	Y	139	139	36	3989	Ref[3015];A[0];T[974];G[0];C[3015]	.	.	LEFT[ - ];RIGHT[ CDS:CAGL0H00110g:2611-3711 ]	.	.	.	.	.
891		Cagl0H	722	*	*/+A	23054	23054	37	3678	*[2848];+A[830]	Other[0]	.	LEFT[ - ];RIGHT[ CDS:CAGL0H00110g:2611-3711 ]	.	.	.	.	.
892		Cagl0H	740	c	S	218	218	36	3684	Ref[2473];A[0];T[0];G[1211];C[2473]	.	.	LEFT[ - ];RIGHT[ CDS:CAGL0H00110g:2611-3711 ]	.	.	.	.	.
893		Cagl0H	773	a	M	188	188	36	3360	Ref[2366];A[2366];T[1];G[0];C[993]	.	.	LEFT[ - ];RIGHT[ CDS:CAGL0H00110g:2611-3711 ]	.	.	.	.	.
894		Cagl0H	878	*	*/+G	2249	2249	34	2839	*[2602];+G[237]	Other[0]	.	LEFT[ - ];RIGHT[ CDS:CAGL0H00110g:2611-3711 ]	.	.	.	.	.
895		Cagl0H	1005	a	R	120	120	35	5994	Ref[4448];A[4448];T[0];G[1546];C[0]	.	.	LEFT[ - ];RIGHT[ CDS:CAGL0H00110g:2611-3711 ]	.	.	.	.	.
896		Cagl0H	1022	c	M	13	13	35	5016	Ref[3908];A[1105];T[2];G[0];C[3908]	Gap[1]	.	LEFT[ - ];RIGHT[ CDS:CAGL0H00110g:2611-3711 ]	.	.	.	.	.
897		Cagl0H	1025	a	R	228	228	35	4763	Ref[2884];A[2884];T[0];G[1879];C[0]	.	.	LEFT[ - ];RIGHT[ CDS:CAGL0H00110g:2611-3711 ]	.	.	.	.	.
898		Cagl0H	1112	a	W	20	20	36	3348	Ref[2674];A[2674];T[674];G[0];C[0]	.	.	LEFT[ - ];RIGHT[ CDS:CAGL0H00110g:2611-3711 ]	.	.	.	.	.
899		Cagl0H	1171	g	R	22	22	36	3178	Ref[2627];A[550];T[0];G[2627];C[1]	.	.	LEFT[ - ];RIGHT[ CDS:CAGL0H00110g:2611-3711 ]	.	.	.	.	.
900		Cagl0H	58930	*	*/-a	75	75	37	723	*[622];-a[46]	Other[55]	.	LEFT[ CDS:CAGL0H00594g:57283-58644 ];RIGHT[ CDS:CAGL0H00616g:59437-60792 ]	.	.	.	.	.
901		Cagl0H	244167	*	*/-t	278	278	37	424	*[377];-t[29]	Other[18]	.	LEFT[ CDS:CAGL0H02673g:243231-244034 ];RIGHT[ CDS:CAGL0H02695g:244561-246210 ]	.	.	.	.	.
902		Cagl0H	274275	t	Y	1	1	37	34	Ref[21];A[0];T[21];G[0];C[13]	.	.	LEFT[ CDS:CAGL0H02937g:269645-271477 ];RIGHT[ CDS:CAGL0H02959g:277540-278319 ]	.	.	.	.	.
903		Cagl0H	276303	*	*/-c	71	71	37	192	*[182];-c[9]	Other[1]	.	LEFT[ CDS:CAGL0H02937g:269645-271477 ];RIGHT[ CDS:CAGL0H02959g:277540-278319 ]	.	.	.	.	.
904		Cagl0H	318700	*	*/-t	440	440	37	363	*[310];-t[34]	Other[19]	.	LEFT[ CDS:CAGL0H03399g:316110-317780 ];RIGHT[ CDS:CAGL0H03421g:319316-320386 ]	.	.	.	.	.
905		Cagl0H	330882	*	*/-c	182	182	36	83	*[77];-c[6]	Other[0]	.	LEFT[ CDS:CAGL0H03553g:328668-330155 ];RIGHT[ CDS:CAGL0H03575g:331303-332847 ]	.	.	.	.	.
906		Cagl0H	396606	*	*/-t	114	114	37	464	*[427];-t[28]	Other[9]	.	LEFT[ CDS:CAGL0H04169g:394311-396407 ];RIGHT[ CDS:CAGL0H04191g:396831-397001 ]	.	.	.	.	.
907		Cagl0H	473769	*	*/-a	482	482	37	370	*[323];-a[31]	Other[16]	.	LEFT[ CDS:CAGL0H04939g:470386-471423 ];RIGHT[ CDS:CAGL0H04961g:474182-475621 ]	.	.	.	.	.
908		Cagl0H	590510	*	*/-a	304	304	36	188	*[167];-a[10]	Other[11]	.	LEFT[ CDS:CAGL0H06017g:588556-590229 ];RIGHT[ CDS:CAGL0H06039g:592526-594295 ]	.	.	.	.	.
909		Cagl0H	614726	*	*/-a	704	704	36	194	*[168];-a[14]	Other[12]	.	LEFT[ CDS:CAGL0H06237g:613054-613962 ];RIGHT[ CDS:CAGL0H06259g:615045-619055 ]	.	.	.	.	.
910		Cagl0H	696023	*	*/-ca	335	335	37	463	*[444];-ca[15]	Other[4]	.	LEFT[ CDS:CAGL0H07007g:694778-695530 ];RIGHT[ CDS:CAGL0H07023g:696225-696497 ]	.	.	.	.	.
911		Cagl0H	717055	*	*/-c	1060	1060	37	326	*[292];-c[32]	Other[2]	.	LEFT[ CDS:CAGL0H07315g:715930-716766 ];RIGHT[ CDS:CAGL0H07337g:718141-718590 ]	.	.	.	.	.
912		Cagl0H	730906	*	*/-a	321	321	36	109	*[100];-a[9]	Other[0]	.	LEFT[ CDS:CAGL0H07469g:729381-730061 ];RIGHT[ CDS:CAGL0H07491g:732854-734389 ]	.	.	.	.	.
913		Cagl0H	732238	*	*/-a	124	124	37	463	*[393];-a[31]	Other[39]	.	LEFT[ CDS:CAGL0H07469g:729381-730061 ];RIGHT[ CDS:CAGL0H07491g:732854-734389 ]	.	.	.	.	.
914		Cagl0H	792692	*	*/-a	34	34	37	489	*[409];-a[32]	Other[48]	.	LEFT[ CDS:CAGL0H08085g:786770-788794 ];RIGHT[ CDS:CAGL0H08107g:792971-793987 ]	.	.	.	.	.
915		Cagl0H	844893	*	*/-a	217	217	36	158	*[148];-a[10]	Other[0]	.	LEFT[ CDS:CAGL0H08602g:843298-844737 ];RIGHT[ CDS:CAGL0H08624g:845036-845593 ]	.	.	.	.	.
916		Cagl0H	852442	*	*/-t	305	305	37	351	*[299];-t[30]	Other[22]	.	LEFT[ exon:CAGL0H08734g:852251-852252 ];RIGHT[ CDS:CAGL0H08756g:853720-853968 ]	.	.	.	.	.
917		Cagl0H	963528	t	C	225	225	37	940	Ref[0];A[0];T[0];G[0];C[940]	.	.	LEFT[ CDS:CAGL0H09856g:962788-963198 ];RIGHT[ CDS:CAGL0H09878g:963767-964630 ]	.	.	.	.	.
918		Cagl0H	978087	*	*/-g	329	329	37	608	*[553];-g[48]	Other[7]	.	LEFT[ CDS:CAGL0H10010g:976466-977299 ];RIGHT[ CDS:CAGL0H10032g:978463-979059 ]	.	.	.	.	.
919		Cagl0H	1010557	a	T	225	225	37	735	Ref[3];A[3];T[732];G[0];C[0]	.	.	LEFT[ CDS:CAGL0H10362g:1009858-1010307 ];RIGHT[ CDS:CAGL0H10384g:1010679-1011473 ]	.	.	.	.	.
920		Cagl0H	1023942	a	R	202	202	37	1281	Ref[851];A[851];T[1];G[429];C[0]	.	.	LEFT[ CDS:CAGL0H10494g:1021457-1023631 ];RIGHT[ CDS:CAGL0H10516g:1024427-1027069 ]	.	.	.	.	.
921		Cagl0H	1023955	*	*/+A	13165	13165	37	1319	*[890];+A[429]	Other[0]	.	LEFT[ CDS:CAGL0H10494g:1021457-1023631 ];RIGHT[ CDS:CAGL0H10516g:1024427-1027069 ]	.	.	.	.	.
922		Cagl0H	1023970	c	M	210	210	37	1319	Ref[890];A[429];T[0];G[0];C[890]	.	.	LEFT[ CDS:CAGL0H10494g:1021457-1023631 ];RIGHT[ CDS:CAGL0H10516g:1024427-1027069 ]	.	.	.	.	.
923		Cagl0H	1023987	c	Y	227	227	37	1365	Ref[936];A[0];T[429];G[0];C[936]	.	.	LEFT[ CDS:CAGL0H10494g:1021457-1023631 ];RIGHT[ CDS:CAGL0H10516g:1024427-1027069 ]	.	.	.	.	.
924		Cagl0H	1049750	*	*/-a	1377	1377	13	1445	*[1313];-a[132]	Other[0]	.	LEFT[ CDS:CAGL0H10626g:1043943-1047923 ];RIGHT[ - ]	.	.	.	.	.
925		Cagl0H	1049888	g	R	0	0	36	2045	Ref[1672];A[373];T[0];G[1672];C[0]	+GT[1]	.	LEFT[ CDS:CAGL0H10626g:1043943-1047923 ];RIGHT[ - ]	.	.	.	.	.
926		Cagl0H	1050248	t	Y	50	50	36	2710	Ref[2049];A[0];T[2049];G[0];C[661]	.	.	LEFT[ CDS:CAGL0H10626g:1043943-1047923 ];RIGHT[ - ]	.	.	.	.	.
927		Cagl0H	1050252	t	Y	45	45	36	2692	Ref[2076];A[0];T[2076];G[0];C[616]	.	.	LEFT[ CDS:CAGL0H10626g:1043943-1047923 ];RIGHT[ - ]	.	.	.	.	.
928		Cagl0H	1050261	c	Y	55	55	36	2642	Ref[2097];A[0];T[545];G[0];C[2097]	.	.	LEFT[ CDS:CAGL0H10626g:1043943-1047923 ];RIGHT[ - ]	.	.	.	.	.
929		Cagl0I	199	t	W	228	228	36	1318	Ref[815];A[503];T[815];G[0];C[0]	.	.	LEFT[ - ];RIGHT[ pseudogene:CAGL0I00110g:2407-8324 ]	.	.	.	.	.
930		Cagl0I	248	t	Y	180	180	36	1146	Ref[771];A[0];T[771];G[0];C[375]	.	.	LEFT[ - ];RIGHT[ pseudogene:CAGL0I00110g:2407-8324 ]	.	.	.	.	.
931		Cagl0I	249	c	Y	190	190	36	1130	Ref[770];A[0];T[360];G[0];C[770]	.	.	LEFT[ - ];RIGHT[ pseudogene:CAGL0I00110g:2407-8324 ]	.	.	.	.	.
932		Cagl0I	389	*	*/+G	2436	2436	37	962	*[828];+G[134]	Other[0]	.	LEFT[ - ];RIGHT[ pseudogene:CAGL0I00110g:2407-8324 ]	.	.	.	.	.
933		Cagl0I	541	g	R	160	160	34	977	Ref[732];A[245];T[0];G[732];C[0]	.	.	LEFT[ - ];RIGHT[ pseudogene:CAGL0I00110g:2407-8324 ]	.	.	.	.	.
934		Cagl0I	592	c	Y	228	228	37	2055	Ref[1120];A[0];T[935];G[0];C[1120]	.	.	LEFT[ - ];RIGHT[ pseudogene:CAGL0I00110g:2407-8324 ]	.	.	.	.	.
935		Cagl0I	609	*	-t/*	25542	43122	37	2050	-t[1232];*[818]	Other[0]	.	LEFT[ - ];RIGHT[ pseudogene:CAGL0I00110g:2407-8324 ]	.	.	.	.	.
936		Cagl0I	626	a	R	228	228	36	2319	Ref[1384];A[1384];T[0];G[934];C[1]	.	.	LEFT[ - ];RIGHT[ pseudogene:CAGL0I00110g:2407-8324 ]	.	.	.	.	.
937		Cagl0I	647	g	R	196	228	33	2123	Ref[1198];A[720];T[0];G[1198];C[205]	.	.	LEFT[ - ];RIGHT[ pseudogene:CAGL0I00110g:2407-8324 ]	.	.	.	.	.
938		Cagl0I	716	c	Y	158	158	30	1630	Ref[1047];A[0];T[583];G[0];C[1047]	.	.	LEFT[ - ];RIGHT[ pseudogene:CAGL0I00110g:2407-8324 ]	.	.	.	.	.
939		Cagl0I	737	c	Y	228	228	33	1875	Ref[837];A[0];T[1036];G[2];C[837]	.	.	LEFT[ - ];RIGHT[ pseudogene:CAGL0I00110g:2407-8324 ]	.	.	.	.	.
940		Cagl0I	1930	c	Y	45	45	36	1321	Ref[1054];A[0];T[266];G[1];C[1054]	.	.	LEFT[ - ];RIGHT[ pseudogene:CAGL0I00110g:2407-8324 ]	.	.	.	.	.
941		Cagl0I	1972	t	Y	228	228	36	941	Ref[599];A[1];T[599];G[1];C[340]	.	.	LEFT[ - ];RIGHT[ pseudogene:CAGL0I00110g:2407-8324 ]	.	.	.	.	.
942		Cagl0I	1974	a	R	228	228	36	922	Ref[603];A[603];T[0];G[319];C[0]	.	.	LEFT[ - ];RIGHT[ pseudogene:CAGL0I00110g:2407-8324 ]	.	.	.	.	.
943		Cagl0I	1984	c	Y	159	159	36	829	Ref[586];A[0];T[243];G[0];C[586]	.	.	LEFT[ - ];RIGHT[ pseudogene:CAGL0I00110g:2407-8324 ]	.	.	.	.	.
944		Cagl0I	18382	*	*/-t	989	989	37	873	*[748];-t[47]	Other[78]	.	LEFT[ CDS:CAGL0I00242g:17649-18146 ];RIGHT[ CDS:CAGL0I00264g:18821-19306 ]	.	.	.	.	.
945		Cagl0I	42818	*	*/-a	155	155	36	173	*[165];-a[8]	Other[0]	.	LEFT[ CDS:CAGL0I00550g:41539-41775 ];RIGHT[ CDS:CAGL0I00572g:43780-44097 ]	.	.	.	.	.
946		Cagl0I	44615	*	*/-t	1752	1752	36	553	*[452];-t[59]	Other[42]	.	LEFT[ CDS:CAGL0I00572g:43780-44097 ];RIGHT[ CDS:CAGL0I00594g:44835-45479 ]	.	.	.	.	.
947		Cagl0I	52413	*	*/-g	1002	1002	36	424	*[375];-g[38]	Other[11]	.	LEFT[ CDS:CAGL0I00704g:51136-51966 ];RIGHT[ CDS:CAGL0I00726g:52542-52931 ]	.	.	.	.	.
948		Cagl0I	53677	*	*/-c	161	161	36	248	*[234];-c[12]	Other[2]	.	LEFT[ CDS:CAGL0I00726g:52542-52931 ];RIGHT[ CDS:CAGL0I00748g:53816-55408 ]	.	.	.	.	.
949		Cagl0I	154462	*	*/-g	245	245	37	418	*[381];-g[29]	Other[8]	.	LEFT[ CDS:CAGL0I01848g:151998-154103 ];RIGHT[ CDS:CAGL0I01870g:154612-156261 ]	.	.	.	.	.
950		Cagl0I	220384	*	*/-g	84	84	37	278	*[256];-g[16]	Other[6]	.	LEFT[ CDS:CAGL0I02464g:217697-220147 ];RIGHT[ CDS:CAGL0I02486g:220865-222178 ]	.	.	.	.	.
951		Cagl0I	232167	*	*/-a	1237	1237	37	577	*[490];-a[54]	Other[33]	.	LEFT[ CDS:CAGL0I02552g:227257-230274 ];RIGHT[ CDS:CAGL0I02574g:232393-233598 ]	.	.	.	.	.
952		Cagl0I	279549	*	*/-a	561	561	37	503	*[424];-a[42]	Other[37]	.	LEFT[ CDS:CAGL0I03234g:278940-279320 ];RIGHT[ CDS:CAGL0I03256g:279779-280867 ]	.	.	.	.	.
953		Cagl0I	281201	*	*/-a	2124	2124	37	318	*[246];-a[44]	Other[28]	.	LEFT[ CDS:CAGL0I03256g:279779-280867 ];RIGHT[ tRNA:CAGL0I03278r:281221-281292 ]	.	.	.	.	.
954		Cagl0I	294380	*	*/-a	893	893	36	219	*[189];-a[16]	Other[14]	.	LEFT[ CDS:CAGL0I03454g:292823-293734 ];RIGHT[ CDS:CAGL0I03476g:294849-296372 ]	.	.	.	.	.
955		Cagl0I	343578	*	*/+GG	126	126	37	290	*[289];+GG[1]	Other[0]	.	LEFT[ CDS:CAGL0I03916g:343014-343559 ];RIGHT[ CDS:CAGL0I03938g:344321-345427 ]	.	.	.	.	.
956		Cagl0I	350339	*	*/-c	113	113	36	51	*[44];-c[6]	Other[1]	.	LEFT[ CDS:CAGL0I03971g:350003-350080 ];RIGHT[ CDS:CAGL0I04004g:351694-352557 ]	.	.	.	.	.
957		Cagl0I	366979	*	*/-a	159	159	37	411	*[349];-a[35]	Other[27]	.	LEFT[ tRNA:CAGL0I04158r:366330-366400 ];RIGHT[ CDS:CAGL0I04180g:367258-368055 ]	.	.	.	.	.
958		Cagl0I	429337	*	*/-c	701	701	37	308	*[275];-c[31]	Other[2]	.	LEFT[ CDS:CAGL0I04774g:427445-428716 ];RIGHT[ CDS:CAGL0I04796g:429791-430675 ]	.	.	.	.	.
959		Cagl0I	445921	*	*/-a	926	926	37	332	*[279];-a[33]	Other[20]	.	LEFT[ CDS:CAGL0I04862g:438338-442861 ];RIGHT[ CDS:CAGL0I04884g:446336-447637 ]	.	.	.	.	.
960		Cagl0I	476941	*	*/-g	178	178	36	120	*[111];-g[9]	Other[0]	.	LEFT[ CDS:CAGL0I05082g:473462-475276 ];RIGHT[ CDS:CAGL0I05098g:478339-478596 ]	.	.	.	.	.
961		Cagl0I	556341	*	*/-t	183	183	37	252	*[225];-t[16]	Other[11]	.	LEFT[ CDS:CAGL0I05852g:554011-555597 ];RIGHT[ CDS:CAGL0I05874g:558102-558845 ]	.	.	.	.	.
962		Cagl0I	569637	*	*/-t	432	432	35	99	*[87];-t[12]	Other[0]	.	LEFT[ CDS:CAGL0I05962g:567117-568832 ];RIGHT[ CDS:CAGL0I05984g:569761-570963 ]	.	.	.	.	.
963		Cagl0I	593847	*	*/-t	954	954	36	187	*[157];-t[22]	Other[8]	.	LEFT[ CDS:CAGL0I06182g:592439-593461 ];RIGHT[ CDS:CAGL0I06204g:595682-596731 ]	.	.	.	.	.
964		Cagl0I	602961	*	*/-ta	272	272	37	388	*[374];-ta[14]	Other[0]	.	LEFT[ CDS:CAGL0I06248g:600351-602792 ];RIGHT[ CDS:CAGL0I06270g:603314-603598 ]	.	.	.	.	.
965		Cagl0I	607583	*	*/-at	541	541	37	411	*[390];-at[17]	Other[4]	.	LEFT[ CDS:CAGL0I06314g:605636-607507 ];RIGHT[ CDS:CAGL0I06336g:607677-608645 ]	.	.	.	.	.
966		Cagl0I	669576	*	*/-a	1140	1140	37	407	*[329];-a[55]	Other[23]	.	LEFT[ CDS:CAGL0I06919g:667962-669200 ];RIGHT[ CDS:CAGL0I06941g:669657-670718 ]	.	.	.	.	.
967		Cagl0I	677690	*	*/+T	43	43	36	150	*[147];+T[3]	Other[0]	.	LEFT[ CDS:CAGL0I07029g:675486-677603 ];RIGHT[ CDS:CAGL0I07051g:679280-680626 ]	.	.	.	.	.
968		Cagl0I	677717	a	W	26	26	36	139	Ref[101];A[101];T[38];G[0];C[0]	.	.	LEFT[ CDS:CAGL0I07029g:675486-677603 ];RIGHT[ CDS:CAGL0I07051g:679280-680626 ]	.	.	.	.	.
969		Cagl0I	715817	c	S	18	18	37	23	Ref[19];A[0];T[0];G[4];C[19]	.	.	LEFT[ CDS:CAGL0I07425g:714551-715390 ];RIGHT[ CDS:CAGL0I07447g:716374-718086 ]	.	.	.	.	.
970		Cagl0I	755304	*	*/-c	80	80	37	30	*[26];-c[4]	Other[0]	.	LEFT[ CDS:CAGL0I07821g:751754-755143 ];RIGHT[ CDS:CAGL0I07837g:755409-755738 ]	.	.	.	.	.
971		Cagl0I	881442	*	*/-g	470	470	36	286	*[256];-g[25]	Other[5]	.	LEFT[ CDS:CAGL0I09086g:879007-880863 ];RIGHT[ CDS:CAGL0I09108g:882180-884075 ]	.	.	.	.	.
972		Cagl0I	901225	*	*/+T	574	574	37	403	*[360];+T[28]	Other[15]	.	LEFT[ CDS:CAGL0I09350g:899921-901144 ];RIGHT[ CDS:CAGL0I09372g:901576-901887 ]	.	.	.	.	.
973		Cagl0I	932483	*	*/-at	2844	2844	36	326	*[271];-at[27]	Other[28]	.	LEFT[ CDS:CAGL0I09746g:931000-932391 ];RIGHT[ CDS:CAGL0I09768g:933082-934608 ]	.	.	.	.	.
974		Cagl0I	946012	*	*/-t	358	358	37	316	*[274];-t[27]	Other[15]	.	LEFT[ CDS:CAGL0I09878g:943766-945856 ];RIGHT[ CDS:CAGL0I09900g:946987-947622 ]	.	.	.	.	.
975		Cagl0I	968378	*	*/-ca	563	563	37	377	*[350];-ca[21]	Other[6]	.	LEFT[ CDS:CAGL0I10098g:959218-964074 ];RIGHT[ CDS:CAGL0I10147g:970731-983741 ]	.	.	.	.	.
976		Cagl0I	1026930	*	*/-a	236	236	36	148	*[135];-a[13]	Other[0]	.	LEFT[ CDS:CAGL0I10362g:1020373-1025691 ];RIGHT[ CDS:CAGL0I10384g:1027883-1029775 ]	.	.	.	.	.
977		Cagl0I	1068396	*	*/-ac	3238	3238	37	625	*[620];-ac[3]	Other[2]	.	LEFT[ CDS:CAGL0I10791g:1066916-1067896 ];RIGHT[ CDS:CAGL0I10813g:1069404-1070108 ]	.	.	.	.	.
978		Cagl0J	280	t	W	168	168	36	1010	Ref[765];A[245];T[765];G[0];C[0]	.	.	LEFT[ - ];RIGHT[ pseudogene:CAGL0J00110g:1577-4151 ]	.	.	.	.	.
979		Cagl0J	297	a	R	62	62	36	1010	Ref[765];A[765];T[0];G[245];C[0]	.	.	LEFT[ - ];RIGHT[ pseudogene:CAGL0J00110g:1577-4151 ]	.	.	.	.	.
980		Cagl0J	599	a	R	228	228	36	1661	Ref[1003];A[1003];T[2];G[656];C[0]	-T[1]	.	LEFT[ - ];RIGHT[ pseudogene:CAGL0J00110g:1577-4151 ]	.	.	.	.	.
981		Cagl0J	631	t	W	228	228	36	1920	Ref[997];A[923];T[997];G[0];C[0]	.	.	LEFT[ - ];RIGHT[ pseudogene:CAGL0J00110g:1577-4151 ]	.	.	.	.	.
982		Cagl0J	772	t	Y	46	46	29	1131	Ref[844];A[12];T[844];G[0];C[275]	.	.	LEFT[ - ];RIGHT[ pseudogene:CAGL0J00110g:1577-4151 ]	.	.	.	.	.
983		Cagl0J	784	t	W	148	148	30	1214	Ref[877];A[337];T[877];G[0];C[0]	.	.	LEFT[ - ];RIGHT[ pseudogene:CAGL0J00110g:1577-4151 ]	.	.	.	.	.
984		Cagl0J	33906	*	*/-g	901	901	36	201	*[179];-g[18]	Other[4]	.	LEFT[ CDS:CAGL0J00407g:31269-32894 ];RIGHT[ CDS:CAGL0J00429g:34645-35103 ]	.	.	.	.	.
985		Cagl0J	69986	*	*/-t	2191	2191	37	455	*[345];-t[66]	Other[44]	.	LEFT[ CDS:CAGL0J00693g:61246-66900 ];RIGHT[ CDS:CAGL0J00715g:70057-70941 ]	.	.	.	.	.
986		Cagl0J	72264	t	Y	20	20	36	35	Ref[14];A[0];T[14];G[0];C[21]	.	.	LEFT[ CDS:CAGL0J00715g:70057-70941 ];RIGHT[ exon:CAGL0J00737g:72900-72902 ]	.	.	.	.	.
987		Cagl0J	149427	*	*/-g	287	287	36	335	*[302];-g[29]	Other[4]	.	LEFT[ tRNA:CAGL0J01551r:146404-146477 ];RIGHT[ CDS:CAGL0J01595g:151584-152618 ]	.	.	.	.	.
988		Cagl0J	163297	a	G	58	225	31	665	Ref[174];A[174];T[1];G[490];C[0]	.	.	LEFT[ CDS:CAGL0J01727g:157842-160781 ];RIGHT[ tRNA:CAGL0J01749r:163678-163750 ]	.	.	.	.	.
989		Cagl0J	179564	*	*/-t	1480	1480	36	257	*[212];-t[18]	Other[27]	.	LEFT[ tRNA:CAGL0J01826r:179238-179310 ];RIGHT[ CDS:CAGL0J01848g:179922-183530 ]	.	.	.	.	.
990		Cagl0J	203288	*	*/-t	966	966	36	318	*[290];-t[21]	Other[7]	.	LEFT[ CDS:CAGL0J02002g:200829-201914 ];RIGHT[ CDS:CAGL0J02024g:203412-204836 ]	.	.	.	.	.
991		Cagl0J	252916	*	*/-t	1188	1188	36	406	*[325];-t[51]	Other[30]	.	LEFT[ CDS:CAGL0J02530g:250629-252893 ];RIGHT[ CDS:CAGL0J02552g:254862-257549 ]	.	.	.	.	.
992		Cagl0J	253451	*	*/-c	683	683	37	335	*[288];-c[37]	Other[10]	.	LEFT[ CDS:CAGL0J02530g:250629-252893 ];RIGHT[ CDS:CAGL0J02552g:254862-257549 ]	.	.	.	.	.
993		Cagl0J	254131	*	*/-c	46	46	36	95	*[92];-c[1]	Other[2]	.	LEFT[ CDS:CAGL0J02530g:250629-252893 ];RIGHT[ CDS:CAGL0J02552g:254862-257549 ]	.	.	.	.	.
994		Cagl0J	254146	t	Y	0	0	37	96	Ref[62];A[1];T[62];G[0];C[22]	Gap[11]	.	LEFT[ CDS:CAGL0J02530g:250629-252893 ];RIGHT[ CDS:CAGL0J02552g:254862-257549 ]	.	.	.	.	.
995		Cagl0J	281612	*	*/-t	527	527	37	314	*[266];-t[27]	Other[21]	.	LEFT[ CDS:CAGL0J02882g:279998-281590 ];RIGHT[ CDS:CAGL0J02904g:282119-283750 ]	.	.	.	.	.
996		Cagl0J	383766	*	*/-g	498	498	36	266	*[248];-g[14]	Other[4]	.	LEFT[ CDS:CAGL0J04026g:379502-383098 ];RIGHT[ CDS:CAGL0J04048g:383930-384367 ]	.	.	.	.	.
997		Cagl0J	449761	*	*/-a	25	25	37	371	*[337];-a[16]	Other[18]	.	LEFT[ CDS:CAGL0J04708g:447836-449728 ];RIGHT[ tRNA:CAGL0J04730r:449942-450015 ]	.	.	.	.	.
998		Cagl0J	468678	*	*/-at	2291	2291	37	375	*[321];-at[37]	Other[17]	.	LEFT[ CDS:CAGL0J04906g:466782-468128 ];RIGHT[ CDS:CAGL0J04928g:468765-471962 ]	.	.	.	.	.
999		Cagl0J	483434	*	*/-t	88	88	37	261	*[236];-t[20]	Other[5]	.	LEFT[ CDS:CAGL0J05060g:481253-483394 ];RIGHT[ CDS:CAGL0J05082g:483782-485743 ]	.	.	.	.	.
1000		Cagl0J	570506	*	*/-at	976	976	37	383	*[364];-at[16]	Other[3]	.	LEFT[ CDS:CAGL0J06028g:568124-569638 ];RIGHT[ CDS:CAGL0J06050g:571225-572331 ]	.	.	.	.	.
1001		Cagl0J	574145	*	*/-g	530	530	36	114	*[96];-g[17]	Other[1]	.	LEFT[ CDS:CAGL0J06050g:571225-572331 ];RIGHT[ CDS:CAGL0J06072g:574501-576822 ]	.	.	.	.	.
1002		Cagl0J	574257	t	K	63	63	36	151	Ref[43];A[0];T[43];G[101];C[0]	Gap[7]	.	LEFT[ CDS:CAGL0J06050g:571225-572331 ];RIGHT[ CDS:CAGL0J06072g:574501-576822 ]	.	.	.	.	.
1003		Cagl0J	613639	*	*/-g	430	430	36	158	*[134];-g[18]	Other[6]	.	LEFT[ CDS:CAGL0J06402g:610975-612270 ];RIGHT[ CDS:CAGL0J06424g:614059-616977 ]	.	.	.	.	.
1004		Cagl0J	624399	*	*/+T	429	429	37	343	*[311];+T[30]	Other[2]	.	LEFT[ CDS:CAGL0J06512g:622640-624277 ];RIGHT[ CDS:CAGL0J06534g:625604-630616 ]	.	.	.	.	.
1005		Cagl0J	642940	*	*/-a	1978	1978	37	243	*[182];-a[42]	Other[19]	.	LEFT[ CDS:CAGL0J06688g:640041-642527 ];RIGHT[ CDS:CAGL0J06710g:644531-645397 ]	.	.	.	.	.
1006		Cagl0J	683027	*	*/-t	5	5	37	351	*[317];-t[20]	Other[14]	.	LEFT[ CDS:CAGL0J07062g:681641-682606 ];RIGHT[ CDS:CAGL0J07084g:684122-685252 ]	.	.	.	.	.
1007		Cagl0J	751887	*	*/-a	409	409	37	381	*[324];-a[36]	Other[21]	.	LEFT[ CDS:CAGL0J07656g:748336-751194 ];RIGHT[ CDS:CAGL0J07678g:752132-752458 ]	.	.	.	.	.
1008		Cagl0J	752913	*	*/-a	446	446	37	359	*[320];-a[23]	Other[16]	.	LEFT[ CDS:CAGL0J07678g:752132-752458 ];RIGHT[ CDS:CAGL0J07700g:753062-753592 ]	.	.	.	.	.
1009		Cagl0J	919615	*	*/+G	559	559	37	360	*[359];+G[1]	Other[0]	.	LEFT[ CDS:CAGL0J09306g:917765-918973 ];RIGHT[ CDS:CAGL0J09328g:920703-921596 ]	.	.	.	.	.
1010		Cagl0J	941470	*	*/-a	472	472	37	461	*[412];-a[32]	Other[17]	.	LEFT[ CDS:CAGL0J09548g:936524-940777 ];RIGHT[ CDS:CAGL0J09570g:941571-943220 ]	.	.	.	.	.
1011		Cagl0J	969968	*	*/-c	616	616	36	233	*[209];-c[19]	Other[5]	.	LEFT[ CDS:CAGL0J09900g:969083-969934 ];RIGHT[ CDS:CAGL0J09922g:973259-974542 ]	.	.	.	.	.
1012		Cagl0J	1083966	*	*/-c	356	356	37	292	*[261];-c[29]	Other[2]	.	LEFT[ CDS:CAGL0J11110g:1082062-1083588 ];RIGHT[ CDS:CAGL0J11132g:1084251-1085066 ]	.	.	.	.	.
1013		Cagl0J	1134477	*	*/-t	1278	1278	37	560	*[472];-t[54]	Other[34]	.	LEFT[ CDS:CAGL0J11638g:1130744-1132984 ];RIGHT[ CDS:CAGL0J11660g:1135618-1137852 ]	.	.	.	.	.
1014		Cagl0J	1192318	g	R	63	63	29	1485	Ref[959];A[526];T[0];G[959];C[0]	.	.	LEFT[ pseudogene:CAGL0J11990g:1188177-1192028 ];RIGHT[ - ]	.	.	.	.	.
1015		Cagl0J	1192364	a	W	213	213	32	1589	Ref[913];A[913];T[676];G[0];C[0]	.	.	LEFT[ pseudogene:CAGL0J11990g:1188177-1192028 ];RIGHT[ - ]	.	.	.	.	.
1016		Cagl0J	1192609	c	Y	3	3	31	960	Ref[790];A[0];T[170];G[0];C[790]	.	.	LEFT[ pseudogene:CAGL0J11990g:1188177-1192028 ];RIGHT[ - ]	.	.	.	.	.
1017		Cagl0J	1192656	c	M	214	214	32	1119	Ref[758];A[360];T[0];G[1];C[758]	.	.	LEFT[ pseudogene:CAGL0J11990g:1188177-1192028 ];RIGHT[ - ]	.	.	.	.	.
1018		Cagl0J	1192663	a	R	215	215	33	1101	Ref[749];A[749];T[0];G[352];C[0]	.	.	LEFT[ pseudogene:CAGL0J11990g:1188177-1192028 ];RIGHT[ - ]	.	.	.	.	.
1019		Cagl0J	1192692	a	R	228	228	34	1211	Ref[697];A[697];T[0];G[514];C[0]	.	.	LEFT[ pseudogene:CAGL0J11990g:1188177-1192028 ];RIGHT[ - ]	.	.	.	.	.
1020		Cagl0J	1192704	t	Y	228	228	32	1245	Ref[726];A[0];T[726];G[0];C[519]	.	.	LEFT[ pseudogene:CAGL0J11990g:1188177-1192028 ];RIGHT[ - ]	.	.	.	.	.
1021		Cagl0J	1192766	g	S	169	169	28	1253	Ref[880];A[0];T[0];G[880];C[373]	.	.	LEFT[ pseudogene:CAGL0J11990g:1188177-1192028 ];RIGHT[ - ]	.	.	.	.	.
1022		Cagl0J	1192939	c	M	6	6	32	1179	Ref[959];A[219];T[1];G[0];C[959]	.	.	LEFT[ pseudogene:CAGL0J11990g:1188177-1192028 ];RIGHT[ - ]	.	.	.	.	.
1023		Cagl0J	1193540	*	*/-gt	2592	2592	24	1487	*[1394];-gt[93]	Other[0]	.	LEFT[ pseudogene:CAGL0J11990g:1188177-1192028 ];RIGHT[ - ]	.	.	.	.	.
1024		Cagl0J	1193697	c	Y	149	149	33	1227	Ref[873];A[0];T[354];G[0];C[873]	.	.	LEFT[ pseudogene:CAGL0J11990g:1188177-1192028 ];RIGHT[ - ]	.	.	.	.	.
1025		Cagl0J	1193711	g	R	228	228	36	1412	Ref[865];A[545];T[1];G[865];C[0]	Gap[1]	.	LEFT[ pseudogene:CAGL0J11990g:1188177-1192028 ];RIGHT[ - ]	.	.	.	.	.
1026		Cagl0J	1193717	g	K	210	210	36	1521	Ref[1050];A[0];T[471];G[1050];C[0]	.	.	LEFT[ pseudogene:CAGL0J11990g:1188177-1192028 ];RIGHT[ - ]	.	.	.	.	.
1027		Cagl0J	1193729	*	*/-t	6987	6987	36	1763	*[1489];-t[274]	Other[0]	.	LEFT[ pseudogene:CAGL0J11990g:1188177-1192028 ];RIGHT[ - ]	.	.	.	.	.
1028		Cagl0J	1193808	t	W	228	228	37	2057	Ref[723];A[1334];T[723];G[0];C[0]	.	.	LEFT[ pseudogene:CAGL0J11990g:1188177-1192028 ];RIGHT[ - ]	.	.	.	.	.
1029		Cagl0J	1193816	t	Y	61	61	37	2026	Ref[1557];A[0];T[1557];G[0];C[469]	.	.	LEFT[ pseudogene:CAGL0J11990g:1188177-1192028 ];RIGHT[ - ]	.	.	.	.	.
1030		Cagl0J	1194003	*	*/-a	563	563	35	1693	*[1551];-a[142]	Other[0]	.	LEFT[ pseudogene:CAGL0J11990g:1188177-1192028 ];RIGHT[ - ]	.	.	.	.	.
1031		Cagl0J	1194025	t	Y	228	228	35	1794	Ref[689];A[0];T[689];G[0];C[1105]	.	.	LEFT[ pseudogene:CAGL0J11990g:1188177-1192028 ];RIGHT[ - ]	.	.	.	.	.
1032		Cagl0J	1194029	a	R	59	59	35	1824	Ref[1431];A[1431];T[0];G[393];C[0]	.	.	LEFT[ pseudogene:CAGL0J11990g:1188177-1192028 ];RIGHT[ - ]	.	.	.	.	.
1033		Cagl0J	1194102	*	*/-aaa	37217	37217	37	2025	*[1477];-aaa[548]	Other[0]	.	LEFT[ pseudogene:CAGL0J11990g:1188177-1192028 ];RIGHT[ - ]	.	.	.	.	.
1034		Cagl0J	1194232	g	S	130	130	33	1633	Ref[1066];A[0];T[0];G[1066];C[567]	.	.	LEFT[ pseudogene:CAGL0J11990g:1188177-1192028 ];RIGHT[ - ]	.	.	.	.	.
1035		Cagl0J	1194373	g	R	195	195	35	1323	Ref[922];A[401];T[0];G[922];C[0]	.	.	LEFT[ pseudogene:CAGL0J11990g:1188177-1192028 ];RIGHT[ - ]	.	.	.	.	.
1036		Cagl0J	1195067	a	M	228	228	36	1314	Ref[729];A[729];T[1];G[0];C[584]	.	.	LEFT[ pseudogene:CAGL0J11990g:1188177-1192028 ];RIGHT[ - ]	.	.	.	.	.
1037		Cagl0K	1	c	Y	25	25	33	52	Ref[42];A[0];T[10];G[0];C[42]	.	.	LEFT[ - ];RIGHT[ CDS:CAGL0K00110g:3332-5830 ]	.	.	.	.	.
1038		Cagl0K	12	g	S	136	136	32	581	Ref[332];A[0];T[1];G[332];C[248]	.	.	LEFT[ - ];RIGHT[ CDS:CAGL0K00110g:3332-5830 ]	.	.	.	.	.
1039		Cagl0K	60	a	W	228	228	31	3009	Ref[1253];A[1253];T[1752];G[0];C[0]	Gap[4]	.	LEFT[ - ];RIGHT[ CDS:CAGL0K00110g:3332-5830 ]	.	.	.	.	.
1040		Cagl0K	75	c	Y	189	189	32	3822	Ref[2663];A[1];T[1157];G[1];C[2663]	.	.	LEFT[ - ];RIGHT[ CDS:CAGL0K00110g:3332-5830 ]	.	.	.	.	.
1041		Cagl0K	164	a	W	150	150	37	4736	Ref[3346];A[3346];T[1157];G[233];C[0]	.	.	LEFT[ - ];RIGHT[ CDS:CAGL0K00110g:3332-5830 ]	.	.	.	.	.
1042		Cagl0K	175	a	R	178	178	37	4488	Ref[3428];A[3428];T[0];G[1060];C[0]	.	.	LEFT[ - ];RIGHT[ CDS:CAGL0K00110g:3332-5830 ]	.	.	.	.	.
1043		Cagl0K	294	g	K	228	228	36	3323	Ref[1123];A[0];T[2198];G[1123];C[0]	Gap[2]	.	LEFT[ - ];RIGHT[ CDS:CAGL0K00110g:3332-5830 ]	.	.	.	.	.
1044		Cagl0K	307	t	K	228	228	35	3380	Ref[1789];A[1];T[1789];G[1589];C[0]	Gap[1]	.	LEFT[ - ];RIGHT[ CDS:CAGL0K00110g:3332-5830 ]	.	.	.	.	.
1045		Cagl0K	340	*	*/+ATTT	8131	8131	34	2837	*[2687];+ATTT[150]	Other[0]	.	LEFT[ - ];RIGHT[ CDS:CAGL0K00110g:3332-5830 ]	.	.	.	.	.
1046		Cagl0K	385	g	R	225	225	35	3087	Ref[2072];A[1015];T[0];G[2072];C[0]	.	.	LEFT[ - ];RIGHT[ CDS:CAGL0K00110g:3332-5830 ]	.	.	.	.	.
1047		Cagl0K	395	g	S	99	99	35	2939	Ref[2169];A[1];T[0];G[2169];C[769]	.	.	LEFT[ - ];RIGHT[ CDS:CAGL0K00110g:3332-5830 ]	.	.	.	.	.
1048		Cagl0K	533	a	W	221	221	37	1324	Ref[889];A[889];T[435];G[0];C[0]	.	.	LEFT[ - ];RIGHT[ CDS:CAGL0K00110g:3332-5830 ]	.	.	.	.	.
1049		Cagl0K	549	t	W	37	37	37	1087	Ref[827];A[260];T[827];G[0];C[0]	.	.	LEFT[ - ];RIGHT[ CDS:CAGL0K00110g:3332-5830 ]	.	.	.	.	.
1050		Cagl0K	986	g	R	228	228	32	4234	Ref[2472];A[1762];T[0];G[2472];C[0]	.	.	LEFT[ - ];RIGHT[ CDS:CAGL0K00110g:3332-5830 ]	.	.	.	.	.
1051		Cagl0K	1095	t	Y	228	228	35	1549	Ref[876];A[0];T[876];G[1];C[672]	.	.	LEFT[ - ];RIGHT[ CDS:CAGL0K00110g:3332-5830 ]	.	.	.	.	.
1052		Cagl0K	1338	t	Y	74	74	33	1952	Ref[1475];A[1];T[1475];G[0];C[476]	.	.	LEFT[ - ];RIGHT[ CDS:CAGL0K00110g:3332-5830 ]	.	.	.	.	.
1053		Cagl0K	1341	c	Y	102	102	34	1990	Ref[1500];A[0];T[490];G[0];C[1500]	.	.	LEFT[ - ];RIGHT[ CDS:CAGL0K00110g:3332-5830 ]	.	.	.	.	.
1054		Cagl0K	1400	t	K	132	132	33	2306	Ref[1748];A[0];T[1748];G[558];C[0]	.	.	LEFT[ - ];RIGHT[ CDS:CAGL0K00110g:3332-5830 ]	.	.	.	.	.
1055		Cagl0K	1584	a	R	212	212	33	2075	Ref[1366];A[1366];T[1];G[708];C[0]	.	.	LEFT[ - ];RIGHT[ CDS:CAGL0K00110g:3332-5830 ]	.	.	.	.	.
1056		Cagl0K	1631	c	Y	30	30	36	3043	Ref[2440];A[0];T[602];G[1];C[2440]	.	.	LEFT[ - ];RIGHT[ CDS:CAGL0K00110g:3332-5830 ]	.	.	.	.	.
1057		Cagl0K	1642	*	*/-g	24602	24602	36	3140	*[2344];-g[796]	Other[0]	.	LEFT[ - ];RIGHT[ CDS:CAGL0K00110g:3332-5830 ]	.	.	.	.	.
1058		Cagl0K	1662	a	W	58	58	36	3253	Ref[2425];A[2425];T[828];G[0];C[0]	.	.	LEFT[ - ];RIGHT[ CDS:CAGL0K00110g:3332-5830 ]	.	.	.	.	.
1059		Cagl0K	1665	c	M	139	139	36	3226	Ref[2374];A[851];T[1];G[0];C[2374]	.	.	LEFT[ - ];RIGHT[ CDS:CAGL0K00110g:3332-5830 ]	.	.	.	.	.
1060		Cagl0K	1691	t	Y	15	15	36	3176	Ref[2539];A[0];T[2539];G[0];C[637]	.	.	LEFT[ - ];RIGHT[ CDS:CAGL0K00110g:3332-5830 ]	.	.	.	.	.
1061		Cagl0K	1733	t	W	228	228	35	2469	Ref[1563];A[906];T[1563];G[0];C[0]	-A[1]	.	LEFT[ - ];RIGHT[ CDS:CAGL0K00110g:3332-5830 ]	.	.	.	.	.
1062		Cagl0K	1785	t	Y	45	45	28	2069	Ref[1619];A[0];T[1619];G[1];C[449]	.	.	LEFT[ - ];RIGHT[ CDS:CAGL0K00110g:3332-5830 ]	.	.	.	.	.
1063		Cagl0K	1795	g	R	38	38	28	2020	Ref[1574];A[446];T[0];G[1574];C[0]	.	.	LEFT[ - ];RIGHT[ CDS:CAGL0K00110g:3332-5830 ]	.	.	.	.	.
1064		Cagl0K	1824	*	*/-ac	33592	33592	29	2320	*[1805];-ac[515]	Other[0]	.	LEFT[ - ];RIGHT[ CDS:CAGL0K00110g:3332-5830 ]	.	.	.	.	.
1065		Cagl0K	1851	a	M	11	11	28	2585	Ref[2067];A[2067];T[0];G[0];C[518]	.	.	LEFT[ - ];RIGHT[ CDS:CAGL0K00110g:3332-5830 ]	.	.	.	.	.
1066		Cagl0K	1876	c	Y	53	53	25	2538	Ref[2074];A[1];T[462];G[1];C[2074]	.	.	LEFT[ - ];RIGHT[ CDS:CAGL0K00110g:3332-5830 ]	.	.	.	.	.
1067		Cagl0K	2301	c	Y	228	228	37	2453	Ref[1600];A[0];T[852];G[1];C[1600]	.	.	LEFT[ - ];RIGHT[ CDS:CAGL0K00110g:3332-5830 ]	.	.	.	.	.
1068		Cagl0K	2428	g	K	196	196	33	2464	Ref[1614];A[0];T[850];G[1614];C[0]	.	.	LEFT[ - ];RIGHT[ CDS:CAGL0K00110g:3332-5830 ]	.	.	.	.	.
1069		Cagl0K	34073	*	*/-a	840	840	37	1215	*[1080];-a[77]	Other[58]	.	LEFT[ CDS:CAGL0K00297g:30321-32204 ];RIGHT[ CDS:CAGL0K00319g:34290-37334 ]	.	.	.	.	.
1070		Cagl0K	44762	*	*/-at	5941	5941	37	1228	*[1088];-at[102]	Other[38]	.	LEFT[ CDS:CAGL0K00407g:43874-44683 ];RIGHT[ CDS:CAGL0K00429g:45259-46407 ]	.	.	.	.	.
1071		Cagl0K	79727	*	*/-a	398	398	37	1000	*[881];-a[74]	Other[45]	.	LEFT[ CDS:CAGL0K00693g:75466-78096 ];RIGHT[ CDS:CAGL0K00715g:80166-81185 ]	.	.	.	.	.
1072		Cagl0K	112162	*	*/-g	713	713	36	171	*[157];-g[10]	Other[4]	.	LEFT[ CDS:CAGL0K01155g:111197-111808 ];RIGHT[ CDS:CAGL0K01177g:112575-113147 ]	.	.	.	.	.
1073		Cagl0K	154982	*	*/+GGG	161	161	35	39	*[37];+GGG[2]	Other[0]	.	LEFT[ CDS:CAGL0K01727g:153398-154897 ];RIGHT[ CDS:CAGL0K01749g:155385-159134 ]	.	.	.	.	.
1074		Cagl0K	209316	*	*/-a	38	38	37	360	*[317];-a[19]	Other[24]	.	LEFT[ CDS:CAGL0K02321g:208082-209149 ];RIGHT[ CDS:CAGL0K02343g:209474-212962 ]	.	.	.	.	.
1075		Cagl0K	310517	*	*/-c	1119	1119	36	107	*[78];-c[26]	Other[3]	.	LEFT[ CDS:CAGL0K03377g:307358-310294 ];RIGHT[ CDS:CAGL0K03399g:311316-313427 ]	.	.	.	.	.
1076		Cagl0K	319065	*	*/-tg	567	567	37	260	*[246];-tg[12]	Other[2]	.	LEFT[ CDS:CAGL0K03443g:317197-319044 ];RIGHT[ CDS:CAGL0K03459g:319329-319613 ]	.	.	.	.	.
1077		Cagl0K	402927	*	*/-t	203	203	36	68	*[62];-t[6]	Other[0]	.	LEFT[ CDS:CAGL0K04279g:397602-398156 ];RIGHT[ CDS:CAGL0K04301g:405248-406315 ]	.	.	.	.	.
1078		Cagl0K	524989	*	*/-c	85	85	36	198	*[186];-c[11]	Other[1]	.	LEFT[ CDS:CAGL0K05335g:521914-523503 ];RIGHT[ CDS:CAGL0K05357g:525728-526846 ]	.	.	.	.	.
1079		Cagl0K	583237	c	S	23	23	37	34	Ref[11];A[0];T[0];G[22];C[11]	Gap[1]	.	LEFT[ CDS:CAGL0K05973g:580733-582439 ];RIGHT[ CDS:CAGL0K05995g:583945-586329 ]	.	.	.	.	.
1080		Cagl0K	600477	*	*/-c	631	631	37	207	*[171];-c[30]	Other[6]	.	LEFT[ exon:CAGL0K06149g:599623-599625 ];RIGHT[ CDS:CAGL0K06193g:601814-603151 ]	.	.	.	.	.
1081		Cagl0K	610744	*	*/-c	301	301	36	192	*[174];-c[17]	Other[1]	.	LEFT[ CDS:CAGL0K06281g:609816-610373 ];RIGHT[ CDS:CAGL0K06303g:611434-621177 ]	.	.	.	.	.
1082		Cagl0K	644190	*	*/+T	413	413	37	241	*[224];+T[5]	Other[12]	.	LEFT[ CDS:CAGL0K06545g:641958-643496 ];RIGHT[ CDS:CAGL0K06567g:644415-644825 ]	.	.	.	.	.
1083		Cagl0K	710728	*	*/-a	374	374	37	325	*[282];-a[22]	Other[21]	.	LEFT[ tRNA:CAGL0K07227r:710349-710456 ];RIGHT[ CDS:CAGL0K07271g:712294-714624 ]	.	.	.	.	.
1084		Cagl0K	724230	*	*/+GA	619	619	37	253	*[251];+GA[1]	Other[1]	.	LEFT[ CDS:CAGL0K07315g:722554-722829 ];RIGHT[ CDS:CAGL0K07337g:724973-725914 ]	.	.	.	.	.
1085		Cagl0K	739537	t	C	63	225	37	29	Ref[0];A[0];T[0];G[0];C[27]	Gap[2]	.	LEFT[ CDS:CAGL0K07458g:737165-739279 ];RIGHT[ CDS:CAGL0K07480g:740462-742165 ]	.	.	.	.	.
1086		Cagl0K	742295	*	*/-t	314	314	37	252	*[217];-t[25]	Other[10]	.	LEFT[ CDS:CAGL0K07480g:740462-742165 ];RIGHT[ CDS:CAGL0K07502g:742349-742990 ]	.	.	.	.	.
1087		Cagl0K	744341	*	-g/-g	1589	20279	37	517	-g[478];*[39]	Other[0]	.	LEFT[ CDS:CAGL0K07524g:743156-744133 ];RIGHT[ CDS:CAGL0K07546g:745201-746172 ]	.	.	.	.	.
1088		Cagl0K	756154	*	*/+T	440	440	37	418	*[367];+T[29]	Other[22]	.	LEFT[ CDS:CAGL0K07634g:754675-756054 ];RIGHT[ CDS:CAGL0K07656g:762217-763710 ]	.	.	.	.	.
1089		Cagl0K	894360	*	*/-at	2229	2229	37	400	*[350];-at[36]	Other[14]	.	LEFT[ CDS:CAGL0K08910g:893007-894317 ];RIGHT[ CDS:CAGL0K08932g:894474-895109 ]	.	.	.	.	.
1090		Cagl0K	922433	*	*/-a	104	104	37	388	*[349];-a[17]	Other[22]	.	LEFT[ CDS:CAGL0K09328g:920567-922105 ];RIGHT[ CDS:CAGL0K09350g:922651-923949 ]	.	.	.	.	.
1091		Cagl0K	969926	*	*/-a	174	174	37	352	*[302];-a[26]	Other[24]	.	LEFT[ CDS:CAGL0K09900g:969098-969703 ];RIGHT[ CDS:CAGL0K09922g:970442-972091 ]	.	.	.	.	.
1092		Cagl0K	1011033	*	*/-t	1209	1209	37	241	*[194];-t[27]	Other[20]	.	LEFT[ CDS:CAGL0K10362g:1009984-1010889 ];RIGHT[ CDS:CAGL0K10384g:1011380-1017694 ]	.	.	.	.	.
1093		Cagl0K	1055047	*	*/-c	46	46	37	104	*[96];-c[8]	Other[0]	.	LEFT[ CDS:CAGL0K10824g:1052591-1054801 ];RIGHT[ CDS:CAGL0K10846g:1055535-1056518 ]	.	.	.	.	.
1094		Cagl0K	1071194	*	*/-ct	1649	1649	37	557	*[513];-ct[33]	Other[11]	.	LEFT[ CDS:CAGL0K10956g:1070703-1070906 ];RIGHT[ CDS:CAGL0K10978g:1071625-1073694 ]	.	.	.	.	.
1095		Cagl0K	1179550	*	*/-a	115	115	37	561	*[492];-a[41]	Other[28]	.	LEFT[ CDS:CAGL0K12078g:1169818-1171209 ];RIGHT[ CDS:CAGL0K12100g:1184212-1185195 ]	.	.	.	.	.
1096		Cagl0K	1198714	*	*/+C	115	115	36	56	*[55];+C[1]	Other[0]	.	LEFT[ CDS:CAGL0K12254g:1197205-1198212 ];RIGHT[ CDS:CAGL0K12276g:1199934-1200518 ]	.	.	.	.	.
1097		Cagl0K	1198727	a	M	35	35	37	47	Ref[35];A[35];T[1];G[0];C[11]	.	.	LEFT[ CDS:CAGL0K12254g:1197205-1198212 ];RIGHT[ CDS:CAGL0K12276g:1199934-1200518 ]	.	.	.	.	.
1098		Cagl0K	1199723	*	*/-ac	3100	3100	37	553	*[490];-ac[44]	Other[19]	.	LEFT[ CDS:CAGL0K12254g:1197205-1198212 ];RIGHT[ CDS:CAGL0K12276g:1199934-1200518 ]	.	.	.	.	.
1099		Cagl0K	1199761	*	*/-ag	1327	1327	37	581	*[580];-ag[1]	Other[0]	.	LEFT[ CDS:CAGL0K12254g:1197205-1198212 ];RIGHT[ CDS:CAGL0K12276g:1199934-1200518 ]	.	.	.	.	.
1100		Cagl0K	1251467	*	*/-t	2047	2047	36	350	*[282];-t[37]	Other[31]	.	LEFT[ CDS:CAGL0K12628g:1246877-1250857 ];RIGHT[ CDS:CAGL0K12650g:1252736-1254094 ]	.	.	.	.	.
1101		Cagl0K	1258114	*	*/-c	676	676	36	146	*[134];-c[9]	Other[3]	.	LEFT[ CDS:CAGL0K12672g:1256370-1256990 ];RIGHT[ exon:CAGL0K12694g:1258451-1258460 ]	.	.	.	.	.
1102		Cagl0K	1270240	*	-c/-c	119	78	37	57	-c[1];*[56]	Other[0]	.	LEFT[ CDS:CAGL0K12804g:1269506-1270024 ];RIGHT[ CDS:CAGL0K12826g:1270892-1271557 ]	.	.	.	.	.
1103		Cagl0K	1270520	*	*/-gt	159	159	37	633	*[609];-gt[22]	Other[2]	.	LEFT[ CDS:CAGL0K12804g:1269506-1270024 ];RIGHT[ CDS:CAGL0K12826g:1270892-1271557 ]	.	.	.	.	.
1104		Cagl0K	1302211	*	*/-t	847	847	37	905	*[815];-t[90]	Other[0]	.	LEFT[ CDS:CAGL0K13024g:1297775-1301002 ];RIGHT[ - ]	.	.	.	.	.
1105		Cagl0K	1302320	g	R	99	99	37	998	Ref[761];A[237];T[0];G[761];C[0]	.	.	LEFT[ CDS:CAGL0K13024g:1297775-1301002 ];RIGHT[ - ]	.	.	.	.	.
1106		Cagl0K	1302378	*	*/+A	14113	14113	37	1163	*[722];+A[441]	Other[0]	.	LEFT[ CDS:CAGL0K13024g:1297775-1301002 ];RIGHT[ - ]	.	.	.	.	.
1107		Cagl0K	1302572	a	R	216	216	30	1096	Ref[733];A[733];T[0];G[363];C[0]	.	.	LEFT[ CDS:CAGL0K13024g:1297775-1301002 ];RIGHT[ - ]	.	.	.	.	.
1108		Cagl0K	1302598	a	W	103	103	32	1110	Ref[755];A[755];T[355];G[0];C[0]	.	.	LEFT[ CDS:CAGL0K13024g:1297775-1301002 ];RIGHT[ - ]	.	.	.	.	.
1109		Cagl0L	224926	*	*/-c	96	96	36	322	*[298];-c[22]	Other[2]	.	LEFT[ CDS:CAGL0L01903g:220700-224563 ];RIGHT[ CDS:CAGL0L01925g:225386-226894 ]	.	.	.	.	.
1110		Cagl0L	235154	*	*/-t	1772	1772	37	538	*[442];-t[69]	Other[27]	.	LEFT[ CDS:CAGL0L01991g:231837-234998 ];RIGHT[ CDS:CAGL0L02013g:235616-237127 ]	.	.	.	.	.
1111		Cagl0L	281503	*	*/-a	390	390	37	418	*[365];-a[33]	Other[20]	.	LEFT[ CDS:CAGL0L02453g:278611-280524 ];RIGHT[ CDS:CAGL0L02475g:291813-292745 ]	.	.	.	.	.
1112		Cagl0L	358681	*	*/-t	844	844	37	371	*[318];-t[33]	Other[20]	.	LEFT[ CDS:CAGL0L03091g:356238-358586 ];RIGHT[ CDS:CAGL0L03113g:360022-360777 ]	.	.	.	.	.
1113		Cagl0L	377034	*	*/-g	120	120	36	216	*[200];-g[14]	Other[2]	.	LEFT[ CDS:CAGL0L03267g:374784-376577 ];RIGHT[ CDS:CAGL0L03289g:378830-379930 ]	.	.	.	.	.
1114		Cagl0L	378498	g	A	225	225	37	399	Ref[0];A[399];T[0];G[0];C[0]	.	.	LEFT[ CDS:CAGL0L03267g:374784-376577 ];RIGHT[ CDS:CAGL0L03289g:378830-379930 ]	.	.	.	.	.
1115		Cagl0L	417188	*	*/-c	243	243	36	168	*[152];-c[14]	Other[2]	.	LEFT[ CDS:CAGL0L03608g:414375-416843 ];RIGHT[ CDS:CAGL0L03630g:417681-419717 ]	.	.	.	.	.
1116		Cagl0L	482482	*	*/-at	1100	1100	37	430	*[401];-at[18]	Other[11]	.	LEFT[ CDS:CAGL0L04092g:479287-482226 ];RIGHT[ CDS:CAGL0L04114g:482705-484447 ]	.	.	.	.	.
1117		Cagl0L	533216	*	*/-t	46	46	37	378	*[341];-t[25]	Other[12]	.	LEFT[ CDS:CAGL0L04598g:531918-533084 ];RIGHT[ CDS:CAGL0L04620g:533791-534585 ]	.	.	.	.	.
1118		Cagl0L	634062	*	*/-at	4719	4719	37	373	*[301];-at[54]	Other[18]	.	LEFT[ CDS:CAGL0L05742g:632841-633758 ];RIGHT[ tRNA:CAGL0L05764r:635740-635812 ]	.	.	.	.	.
1119		Cagl0L	634951	*	*/-t	107	107	36	176	*[163];-t[13]	Other[0]	.	LEFT[ CDS:CAGL0L05742g:632841-633758 ];RIGHT[ tRNA:CAGL0L05764r:635740-635812 ]	.	.	.	.	.
1120		Cagl0L	642793	*	*/-t	1858	1858	37	346	*[262];-t[51]	Other[33]	.	LEFT[ CDS:CAGL0L05786g:638173-639219 ];RIGHT[ CDS:CAGL0L05830g:651511-652161 ]	.	.	.	.	.
1121		Cagl0L	648307	*	*/-c	378	378	37	248	*[224];-c[22]	Other[2]	.	LEFT[ CDS:CAGL0L05786g:638173-639219 ];RIGHT[ CDS:CAGL0L05830g:651511-652161 ]	.	.	.	.	.
1122		Cagl0L	654457	*	*/-a	592	592	37	331	*[273];-a[30]	Other[28]	.	LEFT[ CDS:CAGL0L05852g:652387-653901 ];RIGHT[ CDS:CAGL0L05874g:654937-659505 ]	.	.	.	.	.
1123		Cagl0L	766210	*	*/-ac	22	22	36	32	*[31];-ac[1]	Other[0]	.	LEFT[ CDS:CAGL0L06776g:763580-766066 ];RIGHT[ CDS:CAGL0L06798g:766769-767890 ]	.	.	.	.	.
1124		Cagl0L	785242	c	A	225	225	37	309	Ref[0];A[309];T[0];G[0];C[0]	.	.	LEFT[ CDS:CAGL0L06974g:784296-785117 ];RIGHT[ CDS:CAGL0L06996g:786067-786510 ]	.	.	.	.	.
1125		Cagl0L	836610	*	*/-a	80	80	36	67	*[52];-a[15]	Other[0]	.	LEFT[ CDS:CAGL0L07546g:833821-835725 ];RIGHT[ CDS:CAGL0L07568g:837393-837713 ]	.	.	.	.	.
1126		Cagl0L	890754	*	*/-c	2	2	37	215	*[191];-c[15]	Other[9]	.	LEFT[ exon:CAGL0L08110g:890474-890479 ];RIGHT[ CDS:CAGL0L08114g:891458-891850 ]	.	.	.	.	.
1127		Cagl0L	910220	*	*/-t	1518	1518	36	226	*[173];-t[37]	Other[16]	.	LEFT[ CDS:CAGL0L08228g:909154-910155 ];RIGHT[ CDS:CAGL0L08250g:910339-912927 ]	.	.	.	.	.
1128		Cagl0L	919663	*	*/-ta	728	728	37	344	*[319];-ta[21]	Other[4]	.	LEFT[ CDS:CAGL0L08316g:918700-919461 ];RIGHT[ CDS:CAGL0L08338g:920067-920552 ]	.	.	.	.	.
1129		Cagl0L	1013566	*	*/-a	226	226	37	407	*[375];-a[20]	Other[12]	.	LEFT[ tRNA:CAGL0L09317r:1011594-1011664 ];RIGHT[ CDS:CAGL0L09339g:1014256-1016889 ]	.	.	.	.	.
1130		Cagl0L	1017147	*	*/-t	160	160	37	358	*[314];-t[24]	Other[20]	.	LEFT[ CDS:CAGL0L09339g:1014256-1016889 ];RIGHT[ CDS:CAGL0L09361g:1018071-1018406 ]	.	.	.	.	.
1131		Cagl0L	1033133	*	*/-t	356	356	37	308	*[247];-t[30]	Other[31]	.	LEFT[ CDS:CAGL0L09603g:1031742-1033127 ];RIGHT[ CDS:CAGL0L09625g:1033560-1034402 ]	.	.	.	.	.
1132		Cagl0L	1062927	*	*/-t	509	509	37	212	*[179];-t[22]	Other[11]	.	LEFT[ CDS:CAGL0L09889g:1057762-1059915 ];RIGHT[ CDS:CAGL0L09911g:1064342-1068697 ]	.	.	.	.	.
1133		Cagl0L	1098136	*	*/-c	858	858	36	142	*[114];-c[28]	Other[0]	.	LEFT[ CDS:CAGL0L10186g:1097104-1097625 ];RIGHT[ CDS:CAGL0L10208g:1098507-1100222 ]	.	.	.	.	.
1134		Cagl0L	1130997	*	*/-a	873	873	37	223	*[178];-a[30]	Other[15]	.	LEFT[ CDS:CAGL0L10560g:1128132-1129742 ];RIGHT[ CDS:CAGL0L10582g:1131528-1134824 ]	.	.	.	.	.
1135		Cagl0L	1158971	*	*/-t	275	275	37	211	*[185];-t[17]	Other[9]	.	LEFT[ CDS:CAGL0L10780g:1151884-1158585 ];RIGHT[ CDS:CAGL0L10802g:1159230-1160783 ]	.	.	.	.	.
1136		Cagl0L	1165234	*	*/-a	274	274	37	248	*[208];-a[19]	Other[21]	.	LEFT[ CDS:CAGL0L10868g:1163497-1164480 ];RIGHT[ CDS:CAGL0L10890g:1165380-1166753 ]	.	.	.	.	.
1137		Cagl0L	1182310	*	*/-a	94	94	37	285	*[244];-a[13]	Other[28]	.	LEFT[ CDS:CAGL0L11088g:1181336-1182037 ];RIGHT[ CDS:CAGL0L11110g:1182455-1184182 ]	.	.	.	.	.
1138		Cagl0L	1245290	*	*/-a	1711	1711	36	226	*[169];-a[31]	Other[26]	.	LEFT[ CDS:CAGL0L11638g:1243194-1245020 ];RIGHT[ CDS:CAGL0L11660g:1245685-1250064 ]	.	.	.	.	.
1139		Cagl0L	1377158	*	*/-a	304	304	37	284	*[243];-a[19]	Other[22]	.	LEFT[ CDS:CAGL0L12870g:1376507-1377010 ];RIGHT[ CDS:CAGL0L12892g:1377787-1378776 ]	.	.	.	.	.
1140		Cagl0L	1453921	*	-cca/-cca	23936	307646	36	7966	-cca[7325];-cc[1]	Other[640]	.	LEFT[ rRNA:CAGL0L13409r:1452956-1453076 ];RIGHT[ - ]	.	.	.	.	.
1141		Cagl0L	1455011	a	G	57	207	37	7912	Ref[1392];A[1392];T[3];G[6513];C[3]	Gap[1]	.	LEFT[ rRNA:CAGL0L13409r:1452956-1453076 ];RIGHT[ - ]	.	.	.	.	.
1142		Cagl0L	1455452	*	*/-cc	19547	19547	36	4163	*[4062];-cc[101]	Other[0]	.	LEFT[ rRNA:CAGL0L13409r:1452956-1453076 ];RIGHT[ - ]	.	.	.	.	.
1143		Cagl0L	1455576	*	*/+A	22113	22113	37	3657	*[3151];+A[506]	Other[0]	.	LEFT[ rRNA:CAGL0L13409r:1452956-1453076 ];RIGHT[ - ]	.	.	.	.	.
1144		Cagl0M	2637	*	*/-t	4655	4655	37	725	*[552];-t[104]	Other[69]	.	LEFT[ pseudogene:CAGL0M00110g:2-559 ];RIGHT[ CDS:CAGL0M00132g:11636-14404 ]	.	.	.	.	.
1145		Cagl0M	99380	*	*/-ca	2914	2914	37	510	*[457];-ca[40]	Other[13]	.	LEFT[ CDS:CAGL0M00880g:97304-98599 ];RIGHT[ CDS:CAGL0M00902g:99946-100296 ]	.	.	.	.	.
1146		Cagl0M	146782	*	*/-a	1047	1047	36	255	*[223];-a[17]	Other[15]	.	LEFT[ CDS:CAGL0M01276g:144593-146641 ];RIGHT[ CDS:CAGL0M01298g:147015-148187 ]	.	.	.	.	.
1147		Cagl0M	163641	a	W	228	228	37	1381	Ref[628];A[628];T[753];G[0];C[0]	.	.	LEFT[ CDS:CAGL0M01408g:159500-162646 ];RIGHT[ CDS:CAGL0M01430g:164428-166683 ]	.	.	.	.	.
1148		Cagl0M	163650	t	Y	228	228	37	1619	Ref[612];A[0];T[612];G[0];C[1007]	.	.	LEFT[ CDS:CAGL0M01408g:159500-162646 ];RIGHT[ CDS:CAGL0M01430g:164428-166683 ]	.	.	.	.	.
1149		Cagl0M	163658	g	K	228	228	37	1641	Ref[633];A[0];T[1008];G[633];C[0]	.	.	LEFT[ CDS:CAGL0M01408g:159500-162646 ];RIGHT[ CDS:CAGL0M01430g:164428-166683 ]	.	.	.	.	.
1150		Cagl0M	163672	*	-a/*	19813	35293	37	1663	-a[1008];*[655]	Other[0]	.	LEFT[ CDS:CAGL0M01408g:159500-162646 ];RIGHT[ CDS:CAGL0M01430g:164428-166683 ]	.	.	.	.	.
1151		Cagl0M	163740	t	W	228	228	37	1219	Ref[659];A[560];T[659];G[0];C[0]	.	.	LEFT[ CDS:CAGL0M01408g:159500-162646 ];RIGHT[ CDS:CAGL0M01430g:164428-166683 ]	.	.	.	.	.
1152		Cagl0M	164286	*	*/-a	124	124	37	400	*[368];-a[26]	Other[6]	.	LEFT[ CDS:CAGL0M01408g:159500-162646 ];RIGHT[ CDS:CAGL0M01430g:164428-166683 ]	.	.	.	.	.
1153		Cagl0M	174185	*	*/-ta	4491	4491	37	437	*[375];-ta[49]	Other[13]	.	LEFT[ CDS:CAGL0M01496g:171045-173900 ];RIGHT[ CDS:CAGL0M01518g:174378-175595 ]	.	.	.	.	.
1154		Cagl0M	191729	*	*/-a	2610	2610	36	403	*[306];-a[59]	Other[38]	.	LEFT[ CDS:CAGL0M01694g:187841-190675 ];RIGHT[ CDS:CAGL0M01716g:192389-193696 ]	.	.	.	.	.
1155		Cagl0M	302479	*	*/-c	346	346	37	268	*[238];-c[24]	Other[6]	.	LEFT[ CDS:CAGL0M02607g:298560-302174 ];RIGHT[ CDS:CAGL0M02629g:303016-303657 ]	.	.	.	.	.
1156		Cagl0M	323690	*	*/-a	121	121	37	465	*[409];-a[33]	Other[23]	.	LEFT[ exon:CAGL0M02849g:321650-321739 ];RIGHT[ CDS:CAGL0M02871g:324009-325811 ]	.	.	.	.	.
1157		Cagl0M	329024	*	*/-t	731	731	36	266	*[226];-t[19]	Other[21]	.	LEFT[ CDS:CAGL0M02893g:326338-328779 ];RIGHT[ CDS:CAGL0M02915g:329147-329923 ]	.	.	.	.	.
1158		Cagl0M	379515	*	*/-at	124	124	37	422	*[405];-at[15]	Other[2]	.	LEFT[ CDS:CAGL0M03311g:377932-378930 ];RIGHT[ CDS:CAGL0M03333g:379851-381758 ]	.	.	.	.	.
1159		Cagl0M	530347	*	*/-t	957	957	37	290	*[231];-t[38]	Other[21]	.	LEFT[ CDS:CAGL0M04829g:524685-529805 ];RIGHT[ CDS:CAGL0M04851g:532127-532318 ]	.	.	.	.	.
1160		Cagl0M	532555	*	*/-t	1280	1280	36	195	*[145];-t[29]	Other[21]	.	LEFT[ CDS:CAGL0M04851g:532127-532318 ];RIGHT[ CDS:CAGL0M04873g:532872-533189 ]	.	.	.	.	.
1161		Cagl0M	557801	*	*/-t	742	742	37	317	*[272];-t[34]	Other[11]	.	LEFT[ CDS:CAGL0M05159g:556347-557696 ];RIGHT[ CDS:CAGL0M05181g:558426-559691 ]	.	.	.	.	.
1162		Cagl0M	742376	*	+G/+G	558	8271	37	240	+G[192];+GG[4]	Other[44]	.	LEFT[ CDS:CAGL0M07315g:740469-741557 ];RIGHT[ CDS:CAGL0M07337g:743020-743961 ]	.	.	.	.	.
1163		Cagl0M	742523	*	*/-c	142	142	37	190	*[171];-c[17]	Other[2]	.	LEFT[ CDS:CAGL0M07315g:740469-741557 ];RIGHT[ CDS:CAGL0M07337g:743020-743961 ]	.	.	.	.	.
1164		Cagl0M	744103	*	*/-t	250	250	37	226	*[197];-t[18]	Other[11]	.	LEFT[ CDS:CAGL0M07337g:743020-743961 ];RIGHT[ CDS:CAGL0M07359g:744461-744790 ]	.	.	.	.	.
1165		Cagl0M	746627	*	*/-g	312	312	36	187	*[171];-g[13]	Other[3]	.	LEFT[ CDS:CAGL0M07381g:745077-746510 ];RIGHT[ CDS:CAGL0M07403g:747805-748398 ]	.	.	.	.	.
1166		Cagl0M	767474	*	*/-a	952	952	37	293	*[245];-a[32]	Other[16]	.	LEFT[ CDS:CAGL0M07656g:765772-767379 ];RIGHT[ CDS:CAGL0M07678g:767857-769278 ]	.	.	.	.	.
1167		Cagl0M	846001	*	+C/*	812	904	36	85	+C[12];*[71]	Other[2]	.	LEFT[ tRNA:CAGL0M08470r:845650-845721 ];RIGHT[ CDS:CAGL0M08492g:848089-849096 ]	.	.	.	.	.
1168		Cagl0M	851158	*	*/-tg	500	500	37	328	*[307];-tg[18]	Other[3]	.	LEFT[ CDS:CAGL0M08514g:849926-850558 ];RIGHT[ CDS:CAGL0M08536g:852150-853376 ]	.	.	.	.	.
1169		Cagl0M	854320	*	*/-g	109	109	37	240	*[217];-g[17]	Other[6]	.	LEFT[ CDS:CAGL0M08536g:852150-853376 ];RIGHT[ CDS:CAGL0M08552g:854646-854813 ]	.	.	.	.	.
1170		Cagl0M	860976	*	*/-g	529	529	35	91	*[79];-g[11]	Other[1]	.	LEFT[ CDS:CAGL0M08624g:859796-860809 ];RIGHT[ CDS:CAGL0M08646g:861488-862501 ]	.	.	.	.	.
1171		Cagl0M	879804	*	*/-g	15	15	37	69	*[64];-g[5]	Other[0]	.	LEFT[ CDS:CAGL0M08800g:878328-879119 ];RIGHT[ CDS:CAGL0M08822g:880145-882508 ]	.	.	.	.	.
1172		Cagl0M	898990	*	*/-g	562	562	36	179	*[162];-g[16]	Other[1]	.	LEFT[ CDS:CAGL0M09020g:896312-897358 ];RIGHT[ CDS:CAGL0M09042g:901459-902817 ]	.	.	.	.	.
1173		Cagl0M	913880	*	*/-t	431	431	37	347	*[296];-t[28]	Other[23]	.	LEFT[ CDS:CAGL0M09108g:910473-913802 ];RIGHT[ CDS:CAGL0M09130g:914811-918188 ]	.	.	.	.	.
1174		Cagl0M	952949	g	T	6	37	37	5	Ref[2];A[0];T[3];G[2];C[0]	.	.	LEFT[ CDS:CAGL0M09581g:951054-952685 ];RIGHT[ CDS:CAGL0M09603g:955022-955492 ]	.	.	.	.	.
1175		Cagl0M	1033820	a	C	225	225	37	402	Ref[0];A[0];T[0];G[0];C[402]	.	.	LEFT[ CDS:CAGL0M10307g:1032001-1033347 ];RIGHT[ CDS:CAGL0M10329g:1033952-1034308 ]	.	.	.	.	.
1176		Cagl0M	1081983	*	*/-a	74	74	37	230	*[207];-a[16]	Other[7]	.	LEFT[ CDS:CAGL0M10829g:1076233-1081236 ];RIGHT[ CDS:CAGL0M10890g:1082128-1083222 ]	.	.	.	.	.
1177		Cagl0M	1208701	*	*/-t	293	293	36	189	*[182];-t[6]	Other[1]	.	LEFT[ CDS:CAGL0M12056g:1206666-1207001 ];RIGHT[ CDS:CAGL0M12100g:1209814-1210788 ]	.	.	.	.	.
1178		Cagl0M	1282341	*	*/-t	212	212	37	320	*[284];-t[27]	Other[9]	.	LEFT[ CDS:CAGL0M12991g:1280137-1282317 ];RIGHT[ CDS:CAGL0M13013g:1282841-1283653 ]	.	.	.	.	.
1179		Cagl0M	1402442	*	-t/*	9382	28549	36	1899	-t[184];*[1715]	Other[0]	.	LEFT[ CDS:CAGL0M14113g:1397407-1399152 ];RIGHT[ - ]	.	.	.	.	.
1180		Cagl0C	28197	g	A	225	225	37	804	Ref[0];A[804];T[0];G[0];C[0]	.	CDS	CAGL0C00275g	GL3R0524	CAG58097.1	+	highly similar to uniprot|Q04432 Saccharomyces cerevisiae YDR533c	product=CAGL0C00275p;db_xref=PhylomeDB:CAGL0C00275g;db_xref=InterPro:IPR002818;db_xref=UniProtKB/TrEMBL:Q6FX51;
1181		Cagl0C	97043	a	R	61	61	36	847	Ref[665];A[665];T[0];G[182];C[0]	.	CDS	CAGL0C00968g	GL3M4601	CAG58125.1	+	some similarities with uniprot|Q08294 Saccharomyces cerevisiae YOL155c	product=CAGL0C00968p;db_xref=UniProtKB/TrEMBL:Q6FX23;
1182		Cagl0C	97076	g	R	228	228	34	967	Ref[586];A[381];T[0];G[586];C[0]	.	CDS	CAGL0C00968g	GL3M4601	CAG58125.1	+	some similarities with uniprot|Q08294 Saccharomyces cerevisiae YOL155c	product=CAGL0C00968p;db_xref=UniProtKB/TrEMBL:Q6FX23;
1183		Cagl0C	97188	g	R	228	228	35	1204	Ref[569];A[635];T[0];G[569];C[0]	.	CDS	CAGL0C00968g	GL3M4601	CAG58125.1	+	some similarities with uniprot|Q08294 Saccharomyces cerevisiae YOL155c	product=CAGL0C00968p;db_xref=UniProtKB/TrEMBL:Q6FX23;
1184		Cagl0C	97243	g	K	228	228	36	1288	Ref[563];A[0];T[724];G[563];C[1]	.	CDS	CAGL0C00968g	GL3M4601	CAG58125.1	+	some similarities with uniprot|Q08294 Saccharomyces cerevisiae YOL155c	product=CAGL0C00968p;db_xref=UniProtKB/TrEMBL:Q6FX23;
1185		Cagl0C	98119	g	R	228	228	35	1532	Ref[497];A[1035];T[0];G[497];C[0]	.	CDS	CAGL0C00968g	GL3M4601	CAG58125.1	+	some similarities with uniprot|Q08294 Saccharomyces cerevisiae YOL155c	product=CAGL0C00968p;db_xref=UniProtKB/TrEMBL:Q6FX23;
1186		Cagl0C	98144	a	W	228	228	30	1503	Ref[611];A[611];T[892];G[0];C[0]	.	CDS	CAGL0C00968g	GL3M4601	CAG58125.1	+	some similarities with uniprot|Q08294 Saccharomyces cerevisiae YOL155c	product=CAGL0C00968p;db_xref=UniProtKB/TrEMBL:Q6FX23;
1187		Cagl0C	98145	t	W	228	228	30	1498	Ref[615];A[878];T[615];G[0];C[5]	.	CDS	CAGL0C00968g	GL3M4601	CAG58125.1	+	some similarities with uniprot|Q08294 Saccharomyces cerevisiae YOL155c	product=CAGL0C00968p;db_xref=UniProtKB/TrEMBL:Q6FX23;
1188		Cagl0C	99114	g	S	105	105	26	1009	Ref[498];A[0];T[1];G[498];C[510]	.	CDS	CAGL0C00968g	GL3M4601	CAG58125.1	+	some similarities with uniprot|Q08294 Saccharomyces cerevisiae YOL155c	product=CAGL0C00968p;db_xref=UniProtKB/TrEMBL:Q6FX23;
1189		Cagl0C	99138	g	S	59	59	30	1116	Ref[853];A[0];T[0];G[853];C[263]	.	CDS	CAGL0C00968g	GL3M4601	CAG58125.1	+	some similarities with uniprot|Q08294 Saccharomyces cerevisiae YOL155c	product=CAGL0C00968p;db_xref=UniProtKB/TrEMBL:Q6FX23;
1190		Cagl0C	99150	g	S	228	228	32	1101	Ref[493];A[0];T[0];G[493];C[608]	.	CDS	CAGL0C00968g	GL3M4601	CAG58125.1	+	some similarities with uniprot|Q08294 Saccharomyces cerevisiae YOL155c	product=CAGL0C00968p;db_xref=UniProtKB/TrEMBL:Q6FX23;
1191		Cagl0C	99541	c	Y	49	49	37	786	Ref[600];A[0];T[186];G[0];C[600]	.	CDS	CAGL0C00968g	GL3M4601	CAG58125.1	+	some similarities with uniprot|Q08294 Saccharomyces cerevisiae YOL155c	product=CAGL0C00968p;db_xref=UniProtKB/TrEMBL:Q6FX23;
1192		Cagl0C	116676	a	R	108	108	28	1069	Ref[652];A[652];T[1];G[416];C[0]	.	CDS	CAGL0C01133g	GL3M4601	CAG58129.1	+	some similarities with uniprot|Q08294 Saccharomyces cerevisiae YOL155c	product=CAGL0C01133p;db_xref=UniProtKB/TrEMBL:Q6FX21;
1193		Cagl0C	116695	g	R	112	112	30	1015	Ref[683];A[332];T[0];G[683];C[0]	.	CDS	CAGL0C01133g	GL3M4601	CAG58129.1	+	some similarities with uniprot|Q08294 Saccharomyces cerevisiae YOL155c	product=CAGL0C01133p;db_xref=UniProtKB/TrEMBL:Q6FX21;
1194		Cagl0C	116702	a	R	228	228	31	977	Ref[411];A[411];T[0];G[566];C[0]	.	CDS	CAGL0C01133g	GL3M4601	CAG58129.1	+	some similarities with uniprot|Q08294 Saccharomyces cerevisiae YOL155c	product=CAGL0C01133p;db_xref=UniProtKB/TrEMBL:Q6FX21;
1195		Cagl0C	116880	c	Y	171	228	34	1350	Ref[387];A[0];T[963];G[0];C[387]	.	CDS	CAGL0C01133g	GL3M4601	CAG58129.1	+	some similarities with uniprot|Q08294 Saccharomyces cerevisiae YOL155c	product=CAGL0C01133p;db_xref=UniProtKB/TrEMBL:Q6FX21;
1196		Cagl0C	117747	c	Y	171	171	35	633	Ref[438];A[0];T[195];G[0];C[438]	.	CDS	CAGL0C01133g	GL3M4601	CAG58129.1	+	some similarities with uniprot|Q08294 Saccharomyces cerevisiae YOL155c	product=CAGL0C01133p;db_xref=UniProtKB/TrEMBL:Q6FX21;
1197		Cagl0C	117748	t	K	167	167	35	638	Ref[435];A[0];T[435];G[203];C[0]	.	CDS	CAGL0C01133g	GL3M4601	CAG58129.1	+	some similarities with uniprot|Q08294 Saccharomyces cerevisiae YOL155c	product=CAGL0C01133p;db_xref=UniProtKB/TrEMBL:Q6FX21;
1198		Cagl0C	117801	c	Y	228	228	34	684	Ref[407];A[0];T[277];G[0];C[407]	.	CDS	CAGL0C01133g	GL3M4601	CAG58129.1	+	some similarities with uniprot|Q08294 Saccharomyces cerevisiae YOL155c	product=CAGL0C01133p;db_xref=UniProtKB/TrEMBL:Q6FX21;
1199		Cagl0C	117828	t	Y	228	228	34	685	Ref[403];A[0];T[403];G[0];C[282]	.	CDS	CAGL0C01133g	GL3M4601	CAG58129.1	+	some similarities with uniprot|Q08294 Saccharomyces cerevisiae YOL155c	product=CAGL0C01133p;db_xref=UniProtKB/TrEMBL:Q6FX21;
1200		Cagl0C	117849	a	M	76	76	33	628	Ref[436];A[436];T[0];G[0];C[192]	.	CDS	CAGL0C01133g	GL3M4601	CAG58129.1	+	some similarities with uniprot|Q08294 Saccharomyces cerevisiae YOL155c	product=CAGL0C01133p;db_xref=UniProtKB/TrEMBL:Q6FX21;
1201		Cagl0C	382148	a	C	225	225	37	617	Ref[0];A[0];T[0];G[0];C[617]	.	CDS	CAGL0C03894g	GL3C0081	CAG58251.1	-	weakly similar to uniprot|P40549 Saccharomyces cerevisiae YIL014w MNT3 or uniprot|P53059 Saccharomyces cerevisiae YGL257c MNT2	product=CAGL0C03894p;db_xref=PhylomeDB:CAGL0C03894g;db_xref=UniProtKB/TrEMBL:Q6FWP9;
1202		Cagl0F	90968	t	G	225	225	37	616	Ref[0];A[0];T[0];G[616];C[0]	.	CDS	CAGL0F00803g	GL3M4611	CAG58933.1	+	(ohnolog of CAGL0H06215g), similar to uniprot|P19659 Saccharomyces cerevisiae YOL051w GAL11 DNA- directed RNA polymerase II	inference=similar to AA sequence:UniProtKB:P19659;ohnolog=CAGL0H06215g;product=CAGL0F00803p;db_xref=PhylomeDB:CAGL0F00803g;db_xref=GOA:Q6FUT5;db_xref=InterPro:IPR003101;db_xref=InterPro:IPR008626;db_xref=UniProtKB/TrEMBL:Q6FUT5;
1203		Cagl0F	926389	*	-a/-a	3158	39974	37	1040	-a[937];*[103]	Other[0]	CDS	CAGL0F09273g	.	CAG59295.1	+	no similarity	product=CAGL0F09273p;
1204		Cagl0G	652514	*	*/+CC	247	247	37	343	*[339];+CC[4]	Other[0]	CDS	CAGL0G06842g	GL3C0982	CAG59585.1	-	weakly similar to uniprot|P47068 Saccharomyces cerevisiae YJL020c	product=CAGL0G06842p;db_xref=PhylomeDB:CAGL0G06842g;db_xref=InterPro:IPR001452;db_xref=UniProtKB/TrEMBL:Q6FSY6;
1205		Cagl0G	653876	a	C	225	225	37	428	Ref[0];A[0];T[0];G[0];C[428]	.	CDS	CAGL0G06842g	GL3C0982	CAG59585.1	-	weakly similar to uniprot|P47068 Saccharomyces cerevisiae YJL020c	product=CAGL0G06842p;db_xref=PhylomeDB:CAGL0G06842g;db_xref=InterPro:IPR001452;db_xref=UniProtKB/TrEMBL:Q6FSY6;
1206		Cagl0G	653922	a	C	225	225	37	449	Ref[0];A[0];T[0];G[0];C[449]	.	CDS	CAGL0G06842g	GL3C0982	CAG59585.1	-	weakly similar to uniprot|P47068 Saccharomyces cerevisiae YJL020c	product=CAGL0G06842p;db_xref=PhylomeDB:CAGL0G06842g;db_xref=InterPro:IPR001452;db_xref=UniProtKB/TrEMBL:Q6FSY6;
1207		Cagl0G	653994	a	C	225	225	37	434	Ref[0];A[0];T[0];G[0];C[434]	.	CDS	CAGL0G06842g	GL3C0982	CAG59585.1	-	weakly similar to uniprot|P47068 Saccharomyces cerevisiae YJL020c	product=CAGL0G06842p;db_xref=PhylomeDB:CAGL0G06842g;db_xref=InterPro:IPR001452;db_xref=UniProtKB/TrEMBL:Q6FSY6;
1208		Cagl0G	670054	*	+A/+A	1417	17949	37	513	+A[432];+AA[3]	Other[78]	CDS	CAGL0G07040g	GL3C3182	CAG59594.1	-	similar to uniprot|Q03723 Saccharomyces cerevisiae YML019w OST6 N-oligosaccharyltransferase complex subunit	inference=similar to AA sequence:UniProtKB:Q03723;product=CAGL0G07040p;db_xref=PhylomeDB:CAGL0G07040g;db_xref=InterPro:IPR006844;db_xref=InterPro:IPR021149;db_xref=UniProtKB/TrEMBL:Q6FSX7;
1209		Cagl0G	815281	t	G	225	225	37	448	Ref[0];A[0];T[0];G[448];C[0]	.	CDS	CAGL0G08646g	GL3C4032	CAG59665.1	-	some similarities with uniprot|P40473 Saccharomyces cerevisiae YIL122w	product=CAGL0G08646p;db_xref=PhylomeDB:CAGL0G08646g;db_xref=GOA:Q6FSQ6;db_xref=UniProtKB/Swiss-Prot:Q6FSQ6;
1210		Cagl0G	922578	a	M	45	45	37	664	Ref[429];A[429];T[0];G[0];C[235]	.	CDS	CAGL0G09691g	GL3R1553	CAG59708.1	-	highly similar to uniprot|P33330 Saccharomyces cerevisiae YOR184w SER1 phosphoserine transaminase	product=CAGL0G09691p;db_xref=PhylomeDB:CAGL0G09691g;db_xref=GOA:Q6FSL3;db_xref=InterPro:IPR000192;db_xref=InterPro:IPR003248;db_xref=InterPro:IPR015421;db_xref=InterPro:IPR015422;db_xref=InterPro:IPR015424;db_xref=InterPro:IPR020578;db_xref=InterPro:IPR022278;db_xref=UniProtKB/TrEMBL:Q6FSL3;
1211		Cagl0G	931981	c	A	225	225	37	668	Ref[0];A[668];T[0];G[0];C[0]	.	CDS	CAGL0G09757g	GL3C3118	CAG59711.1	+	some similarities with uniprot|Q05854 Saccharomyces cerevisiae YLR278c	product=CAGL0G09757p;db_xref=PhylomeDB:CAGL0G09757g;db_xref=GOA:Q6FSL0;db_xref=InterPro:IPR001138;db_xref=InterPro:IPR007219;db_xref=UniProtKB/TrEMBL:Q6FSL0;
1212		Cagl0G	990718	a	R	2	2	33	1199	Ref[957];A[957];T[0];G[242];C[0]	.	CDS	CAGL0G10219g	GL3M4601	CAG59732.1	+	some similarities with uniprot|P38894 Saccharomyces cerevisiae YHR211w FLO5	product=CAGL0G10219p;db_xref=UniProtKB/TrEMBL:Q6FSI9;
1213		Cagl0G	990830	g	R	177	177	35	2265	Ref[1669];A[595];T[0];G[1669];C[1]	.	CDS	CAGL0G10219g	GL3M4601	CAG59732.1	+	some similarities with uniprot|P38894 Saccharomyces cerevisiae YHR211w FLO5	product=CAGL0G10219p;db_xref=UniProtKB/TrEMBL:Q6FSI9;
1214		Cagl0G	990831	t	W	161	161	35	2280	Ref[1541];A[739];T[1541];G[0];C[0]	.	CDS	CAGL0G10219g	GL3M4601	CAG59732.1	+	some similarities with uniprot|P38894 Saccharomyces cerevisiae YHR211w FLO5	product=CAGL0G10219p;db_xref=UniProtKB/TrEMBL:Q6FSI9;
1215		Cagl0G	990880	c	Y	125	125	32	2109	Ref[1525];A[0];T[583];G[1];C[1525]	.	CDS	CAGL0G10219g	GL3M4601	CAG59732.1	+	some similarities with uniprot|P38894 Saccharomyces cerevisiae YHR211w FLO5	product=CAGL0G10219p;db_xref=UniProtKB/TrEMBL:Q6FSI9;
1216		Cagl0G	990901	t	Y	217	217	29	1792	Ref[1178];A[1];T[1178];G[1];C[612]	.	CDS	CAGL0G10219g	GL3M4601	CAG59732.1	+	some similarities with uniprot|P38894 Saccharomyces cerevisiae YHR211w FLO5	product=CAGL0G10219p;db_xref=UniProtKB/TrEMBL:Q6FSI9;
1217		Cagl0H	3078	c	Y	206	206	34	931	Ref[622];A[0];T[309];G[0];C[622]	.	CDS	CAGL0H00110g	.	CAG59733.1	-	some similarities with uniprot|P08640 Saccharomyces cerevisiae YIR019c STA1	product=CAGL0H00110p;db_xref=UniProtKB/TrEMBL:Q6FSI8;
1218		Cagl0H	3087	c	S	218	218	34	987	Ref[616];A[0];T[0];G[371];C[616]	.	CDS	CAGL0H00110g	.	CAG59733.1	-	some similarities with uniprot|P08640 Saccharomyces cerevisiae YIR019c STA1	product=CAGL0H00110p;db_xref=UniProtKB/TrEMBL:Q6FSI8;
1219		Cagl0H	3140	t	Y	228	228	34	985	Ref[627];A[0];T[627];G[1];C[357]	.	CDS	CAGL0H00110g	.	CAG59733.1	-	some similarities with uniprot|P08640 Saccharomyces cerevisiae YIR019c STA1	product=CAGL0H00110p;db_xref=UniProtKB/TrEMBL:Q6FSI8;
1220		Cagl0H	3142	t	K	203	203	34	981	Ref[632];A[0];T[632];G[349];C[0]	.	CDS	CAGL0H00110g	.	CAG59733.1	-	some similarities with uniprot|P08640 Saccharomyces cerevisiae YIR019c STA1	product=CAGL0H00110p;db_xref=UniProtKB/TrEMBL:Q6FSI8;
1221		Cagl0H	3154	t	K	149	149	35	938	Ref[630];A[0];T[630];G[308];C[0]	.	CDS	CAGL0H00110g	.	CAG59733.1	-	some similarities with uniprot|P08640 Saccharomyces cerevisiae YIR019c STA1	product=CAGL0H00110p;db_xref=UniProtKB/TrEMBL:Q6FSI8;
1222		Cagl0H	18709	*	*/+C	140	140	37	416	*[413];+C[2]	Other[1]	CDS	CAGL0H00242g	GL3C0280	CAG59739.1	+	(ohnolog of CAGL0G09911g), highly similar to uniprot|P15303 Saccharomyces cerevisiae YPR181c SEC23	ohnolog=CAGL0G09911g;product=CAGL0H00242p;db_xref=PhylomeDB:CAGL0H00242g;db_xref=GOA:Q6FSI6;db_xref=HSSP:1M2V;db_xref=InterPro:IPR006895;db_xref=InterPro:IPR006896;db_xref=InterPro:IPR006900;db_xref=InterPro:IPR007123;db_xref=InterPro:IPR012990;db_xref=UniProtKB/Swiss-Prot:Q6FSI6;
1223		Cagl0H	190814	*	*/+CG	188	188	36	252	*[245];+CG[7]	Other[0]	CDS	CAGL0H02145g	GL3C4803	CAG59821.1	-	(ohnolog of CAGL0M01254g), weakly similar to uniprot|P13574 Saccharomyces cerevisiae YHR084w STE12 transcriptional activator	ohnolog=CAGL0M01254g;product=CAGL0H02145p;db_xref=PhylomeDB:CAGL0H02145g;db_xref=GOA:Q6FSA6;db_xref=InterPro:IPR003120;db_xref=UniProtKB/TrEMBL:Q6FSA6;
1224		Cagl0H	617811	*	+C/+C	1349	17351	37	463	+C[406];*[57]	Other[0]	CDS	CAGL0H06259g	GL3R0626	CAG60000.1	+	(ohnolog of CAGL0F00913g), similar to uniprot|P31374 Saccharomyces cerevisiae YAL017w FUN31	inference=similar to AA sequence:UniProtKB:P31374;ohnolog=CAGL0F00913g;product=CAGL0H06259p;db_xref=PhylomeDB:CAGL0H06259g;db_xref=GOA:Q6FRS7;db_xref=InterPro:IPR000014;db_xref=InterPro:IPR000719;db_xref=InterPro:IPR002290;db_xref=InterPro:IPR008271;db_xref=InterPro:IPR011009;db_xref=InterPro:IPR017442;db_xref=UniProtKB/TrEMBL:Q6FRS7;
1225		Cagl0H	1046972	a	R	43	43	31	1204	Ref[922];A[922];T[0];G[282];C[0]	.	CDS	CAGL0H10626g	GL3M4601	CAG60193.1	+	some similarities with uniprot|P32768 Saccharomyces cerevisiae YAR050w FLO1	product=CAGL0H10626p;db_xref=UniProtKB/TrEMBL:Q6FR84;
1226		Cagl0H	1047006	t	K	228	228	35	1474	Ref[951];A[0];T[951];G[522];C[1]	.	CDS	CAGL0H10626g	GL3M4601	CAG60193.1	+	some similarities with uniprot|P32768 Saccharomyces cerevisiae YAR050w FLO1	product=CAGL0H10626p;db_xref=UniProtKB/TrEMBL:Q6FR84;
1227		Cagl0H	1047008	t	K	228	228	35	1467	Ref[911];A[0];T[911];G[556];C[0]	.	CDS	CAGL0H10626g	GL3M4601	CAG60193.1	+	some similarities with uniprot|P32768 Saccharomyces cerevisiae YAR050w FLO1	product=CAGL0H10626p;db_xref=UniProtKB/TrEMBL:Q6FR84;
1228		Cagl0H	1047062	t	Y	228	228	35	1514	Ref[860];A[0];T[860];G[0];C[654]	.	CDS	CAGL0H10626g	GL3M4601	CAG60193.1	+	some similarities with uniprot|P32768 Saccharomyces cerevisiae YAR050w FLO1	product=CAGL0H10626p;db_xref=UniProtKB/TrEMBL:Q6FR84;
1229		Cagl0H	1047089	c	Y	40	40	34	1360	Ref[1052];A[0];T[308];G[0];C[1052]	.	CDS	CAGL0H10626g	GL3M4601	CAG60193.1	+	some similarities with uniprot|P32768 Saccharomyces cerevisiae YAR050w FLO1	product=CAGL0H10626p;db_xref=UniProtKB/TrEMBL:Q6FR84;
1230		Cagl0I	248677	*	-a/-a	670	8397	37	224	-a[201];*[23]	Other[0]	CDS	CAGL0I02816g	GL3C0752	CAG60310.1	-	similar to uniprot|P41696 Saccharomyces cerevisiae YOR113w AZF1 asparagine-rich zinc finger protein	inference=similar to AA sequence:UniProtKB:P41696;product=CAGL0I02816p;db_xref=GOA:Q6FQX1;db_xref=InterPro:IPR007087;db_xref=InterPro:IPR013087;db_xref=InterPro:IPR015880;db_xref=UniProtKB/TrEMBL:Q6FQX1;
1231		Cagl0I	248722	*	-g/-g	881	11288	37	281	-g[247];*[34]	Other[0]	CDS	CAGL0I02838g	GL3C0752	CAG60311.1	-	(ohnolog of CAGL0L03916g), similar to uniprot|P41696 Saccharomyces cerevisiae YOR113w AZF1 asparagine-rich zinc finger protein	inference=similar to AA sequence:UniProtKB:P41696;ohnolog=CAGL0L03916g;product=CAGL0I02838p;db_xref=PhylomeDB:CAGL0I02838g;db_xref=GOA:Q6FQX0;db_xref=InterPro:IPR007087;db_xref=InterPro:IPR013087;db_xref=InterPro:IPR015880;db_xref=UniProtKB/TrEMBL:Q6FQX0;
1232		Cagl0I	1023356	c	M	228	228	37	2456	Ref[1257];A[1199];T[0];G[0];C[1257]	.	CDS	CAGL0I10362g	GL3M4601	CAG60635.2	+	no similarity	product=CAGL0I10362p;db_xref=PhylomeDB:CAGL0I10362g;db_xref=InterPro:IPR011658;db_xref=UniProtKB/TrEMBL:Q6FQ04;
1233		Cagl0J	168095	a	T	225	225	32	332	Ref[8];A[8];T[320];G[2];C[2]	.	CDS	CAGL0J01774g	GL3C3673	CAR58040.1	-	no similarity	product=CAGL0J01774p;db_xref=UniProtKB/TrEMBL:B4UN24;
1234		Cagl0J	168128	c	T	225	225	33	171	Ref[13];A[0];T[157];G[1];C[13]	.	CDS	CAGL0J01774g	GL3C3673	CAR58040.1	-	no similarity	product=CAGL0J01774p;db_xref=UniProtKB/TrEMBL:B4UN24;
1235		Cagl0J	247572	t	A	225	225	37	572	Ref[1];A[570];T[1];G[1];C[0]	.	CDS	CAGL0J02508g	GL3C4804	CAG60763.1	-	some similarities with CA1576|CaHYR1 Candida albicans CaHYR1 and DEHA-IPF10153.1 Debaryomyces hansenii	product=CAGL0J02508p;db_xref=UniProtKB/TrEMBL:Q6FPN0;
1236		Cagl0J	387164	*	-a/-a	509	5746	36	157	-a[122];*[35]	Other[0]	CDS	CAGL0J04114g	GL3C0013	CAG60833.1	-	similar to uniprot|Q99297 Saccharomyces cerevisiae YOR222w ODC2 or uniprot|Q03028 Saccharomyces cerevisiae YPL134c ODC1	inference=similar to AA sequence:UniProtKB:Q99297;product=CAGL0J04114p;db_xref=PhylomeDB:CAGL0J04114g;db_xref=GOA:Q6FPG0;db_xref=InterPro:IPR001993;db_xref=InterPro:IPR002113;db_xref=InterPro:IPR018108;db_xref=UniProtKB/TrEMBL:Q6FPG0;
1237		Cagl0J	387196	*	-c/-c	566	6279	37	176	-c[152];*[24]	Other[0]	CDS	CAGL0J04114g	GL3C0013	CAG60833.1	-	similar to uniprot|Q99297 Saccharomyces cerevisiae YOR222w ODC2 or uniprot|Q03028 Saccharomyces cerevisiae YPL134c ODC1	inference=similar to AA sequence:UniProtKB:Q99297;product=CAGL0J04114p;db_xref=PhylomeDB:CAGL0J04114g;db_xref=GOA:Q6FPG0;db_xref=InterPro:IPR001993;db_xref=InterPro:IPR002113;db_xref=InterPro:IPR018108;db_xref=UniProtKB/TrEMBL:Q6FPG0;
1238		Cagl0J	398441	c	A	225	225	37	372	Ref[0];A[372];T[0];G[0];C[0]	.	CDS	CAGL0J04246g	GL3C0179	CAG60839.1	+	similar to uniprot|Q04740 Saccharomyces cerevisiae YMR234w RNH1 ribonuclease H	inference=similar to AA sequence:UniProtKB:Q04740;product=CAGL0J04246p;db_xref=PhylomeDB:CAGL0J04246g;db_xref=GOA:Q6FPF4;db_xref=InterPro:IPR002156;db_xref=InterPro:IPR009027;db_xref=InterPro:IPR011320;db_xref=InterPro:IPR012337;db_xref=UniProtKB/TrEMBL:Q6FPF4;
1239		Cagl0J	481698	*	*/+G	195	195	36	148	*[145];+G[3]	Other[0]	CDS	CAGL0J05060g	GL3C2537	CAG60875.1	+	similar to uniprot|P47043 Saccharomyces cerevisiae YJL056c ZAP1 metalloregulatory protein	inference=similar to AA sequence:UniProtKB:P47043;product=CAGL0J05060p;db_xref=PhylomeDB:CAGL0J05060g;db_xref=GOA:Q6FPB8;db_xref=InterPro:IPR007087;db_xref=InterPro:IPR013087;db_xref=InterPro:IPR015880;db_xref=UniProtKB/TrEMBL:Q6FPB8;
1240		Cagl0J	490372	a	M	149	149	35	479	Ref[338];A[338];T[0];G[0];C[141]	.	CDS	CAGL0J05159g	GL3C4721	CAR58044.1	-	no similarity	product=CAGL0J05159p;db_xref=UniProtKB/TrEMBL:B4UN28;
1241		Cagl0J	953829	*	+CG/+CG	476	10148	37	146	+CG[124];*[22]	Other[0]	CDS	CAGL0J09702g	GL3C0308	CAG61082.1	-	similar to uniprot|Q07622 Saccharomyces cerevisiae YDL203c	inference=similar to AA sequence:UniProtKB:Q07622;product=CAGL0J09702p;db_xref=PhylomeDB:CAGL0J09702g;db_xref=GOA:Q6FNR3;db_xref=InterPro:IPR006597;db_xref=InterPro:IPR011990;db_xref=UniProtKB/TrEMBL:Q6FNR3;
1242		Cagl0J	1004938	c	T	225	225	37	643	Ref[0];A[0];T[643];G[0];C[0]	.	CDS	CAGL0J10274g	GL3C3490	CAG61109.1	-	similar to uniprot|P34072 Saccharomyces cerevisiae YNL076w MKS1 pleiotropic regulatory factor	inference=similar to AA sequence:UniProtKB:P34072;product=CAGL0J10274p;db_xref=PhylomeDB:CAGL0J10274g;db_xref=InterPro:IPR013860;db_xref=UniProtKB/TrEMBL:Q6FNN6;
1243		Cagl0J	1096487	t	C	225	225	37	664	Ref[0];A[0];T[0];G[0];C[664]	.	CDS	CAGL0J11264g	GL3C2547	CAG61153.1	-	highly similar to uniprot|P53878 Saccharomyces cerevisiae YNL181w	product=CAGL0J11264p;db_xref=PhylomeDB:CAGL0J11264g;db_xref=GOA:Q6FNJ2;db_xref=InterPro:IPR002198;db_xref=InterPro:IPR016040;db_xref=UniProtKB/TrEMBL:Q6FNJ2;
1244		Cagl0J	1164491	a	W	161	161	32	1501	Ref[1081];A[1081];T[420];G[0];C[0]	.	CDS	CAGL0J11891g	.	CAR58048.1	-	no similarity	product=CAGL0J11891p;db_xref=UniProtKB/TrEMBL:B4UN32;
1245		Cagl0J	1164500	g	R	168	168	33	1444	Ref[1055];A[389];T[0];G[1055];C[0]	.	CDS	CAGL0J11891g	.	CAR58048.1	-	no similarity	product=CAGL0J11891p;db_xref=UniProtKB/TrEMBL:B4UN32;
1246		Cagl0K	3994	a	W	44	44	36	2582	Ref[2019];A[2019];T[537];G[24];C[2]	.	CDS	CAGL0K00110g	GL3M4601	CAG61192.1	-	some similarities with uniprot|Q08294 Saccharomyces cerevisiae YOL155c	product=CAGL0K00110p;db_xref=PhylomeDB:CAGL0K00110g;db_xref=InterPro:IPR021031;db_xref=UniProtKB/TrEMBL:Q6FNG1;
1247		Cagl0K	3998	g	R	213	213	36	2702	Ref[1825];A[875];T[0];G[1825];C[2]	.	CDS	CAGL0K00110g	GL3M4601	CAG61192.1	-	some similarities with uniprot|Q08294 Saccharomyces cerevisiae YOL155c	product=CAGL0K00110p;db_xref=PhylomeDB:CAGL0K00110g;db_xref=InterPro:IPR021031;db_xref=UniProtKB/TrEMBL:Q6FNG1;
1248		Cagl0K	4057	g	S	228	228	35	3342	Ref[1245];A[0];T[1];G[1245];C[2096]	.	CDS	CAGL0K00110g	GL3M4601	CAG61192.1	-	some similarities with uniprot|Q08294 Saccharomyces cerevisiae YOL155c	product=CAGL0K00110p;db_xref=PhylomeDB:CAGL0K00110g;db_xref=InterPro:IPR021031;db_xref=UniProtKB/TrEMBL:Q6FNG1;
1249		Cagl0K	4067	c	S	228	228	35	3351	Ref[966];A[1];T[0];G[2384];C[966]	.	CDS	CAGL0K00110g	GL3M4601	CAG61192.1	-	some similarities with uniprot|Q08294 Saccharomyces cerevisiae YOL155c	product=CAGL0K00110p;db_xref=PhylomeDB:CAGL0K00110g;db_xref=InterPro:IPR021031;db_xref=UniProtKB/TrEMBL:Q6FNG1;
1250		Cagl0K	4096	t	Y	228	228	36	2783	Ref[1045];A[3];T[1045];G[1];C[1734]	.	CDS	CAGL0K00110g	GL3M4601	CAG61192.1	-	some similarities with uniprot|Q08294 Saccharomyces cerevisiae YOL155c	product=CAGL0K00110p;db_xref=PhylomeDB:CAGL0K00110g;db_xref=InterPro:IPR021031;db_xref=UniProtKB/TrEMBL:Q6FNG1;
1251		Cagl0K	4099	t	Y	228	228	36	2371	Ref[1044];A[2];T[1044];G[2];C[1323]	.	CDS	CAGL0K00110g	GL3M4601	CAG61192.1	-	some similarities with uniprot|Q08294 Saccharomyces cerevisiae YOL155c	product=CAGL0K00110p;db_xref=PhylomeDB:CAGL0K00110g;db_xref=InterPro:IPR021031;db_xref=UniProtKB/TrEMBL:Q6FNG1;
1252		Cagl0K	4741	c	Y	34	34	37	2020	Ref[1529];A[0];T[491];G[0];C[1529]	.	CDS	CAGL0K00110g	GL3M4601	CAG61192.1	-	some similarities with uniprot|Q08294 Saccharomyces cerevisiae YOL155c	product=CAGL0K00110p;db_xref=PhylomeDB:CAGL0K00110g;db_xref=InterPro:IPR021031;db_xref=UniProtKB/TrEMBL:Q6FNG1;
1253		Cagl0K	4763	t	Y	190	190	37	2129	Ref[1457];A[0];T[1457];G[0];C[672]	.	CDS	CAGL0K00110g	GL3M4601	CAG61192.1	-	some similarities with uniprot|Q08294 Saccharomyces cerevisiae YOL155c	product=CAGL0K00110p;db_xref=PhylomeDB:CAGL0K00110g;db_xref=InterPro:IPR021031;db_xref=UniProtKB/TrEMBL:Q6FNG1;
1254		Cagl0K	4772	c	Y	216	216	37	2141	Ref[1427];A[1];T[713];G[0];C[1427]	.	CDS	CAGL0K00110g	GL3M4601	CAG61192.1	-	some similarities with uniprot|Q08294 Saccharomyces cerevisiae YOL155c	product=CAGL0K00110p;db_xref=PhylomeDB:CAGL0K00110g;db_xref=InterPro:IPR021031;db_xref=UniProtKB/TrEMBL:Q6FNG1;
1255		Cagl0K	15129	t	Y	228	228	35	3046	Ref[1396];A[4];T[1396];G[0];C[1646]	.	CDS	CAGL0K00170g	GL3C0749	CAR58049.1	+	no similarity	product=CAGL0K00170p;db_xref=InterPro:IPR018871;db_xref=UniProtKB/TrEMBL:B4UN33;
1256		Cagl0K	15216	g	R	145	145	35	7671	Ref[5679];A[1990];T[0];G[5679];C[2]	.	CDS	CAGL0K00170g	GL3C0749	CAR58049.1	+	no similarity	product=CAGL0K00170p;db_xref=InterPro:IPR018871;db_xref=UniProtKB/TrEMBL:B4UN33;
1257		Cagl0K	15219	t	Y	15	15	35	7415	Ref[5969];A[5];T[5969];G[1];C[1439]	Gap[1]	CDS	CAGL0K00170g	GL3C0749	CAR58049.1	+	no similarity	product=CAGL0K00170p;db_xref=InterPro:IPR018871;db_xref=UniProtKB/TrEMBL:B4UN33;
1258		Cagl0K	15234	t	Y	100	100	35	6039	Ref[4811];A[0];T[4811];G[0];C[1228]	.	CDS	CAGL0K00170g	GL3C0749	CAR58049.1	+	no similarity	product=CAGL0K00170p;db_xref=InterPro:IPR018871;db_xref=UniProtKB/TrEMBL:B4UN33;
1259		Cagl0K	132050	*	*/+AT	2144	2144	37	567	*[542];+AT[25]	Other[0]	CDS	CAGL0K01507g	GL3C0537	CAG61251.1	-	similar to uniprot|Q12361 Saccharomyces cerevisiae YDL035c G-protein coupled receptor	inference=similar to AA sequence:UniProtKB:Q12361;product=CAGL0K01507p;db_xref=PhylomeDB:CAGL0K01507g;db_xref=UniProtKB/TrEMBL:Q6FNA4;
1260		Cagl0K	510990	*	*/+AAC	1203	1203	37	165	*[161];+AAC[4]	Other[0]	CDS	CAGL0K05247g	GL3C0962	CAG61414.1	+	(ohnolog of CAGL0M09449g), some similarities with uniprot|P38167 Saccharomyces cerevisiae YBL101c involved in cell wall biogenesis and architecture	ohnolog=CAGL0M09449g;product=CAGL0K05247p;db_xref=PhylomeDB:CAGL0K05247g;db_xref=InterPro:IPR011022;db_xref=UniProtKB/TrEMBL:Q6FMU1;
1261		Cagl0K	556803	c	T	225	225	37	514	Ref[0];A[0];T[514];G[0];C[0]	.	CDS	CAGL0K05709g	GL3C0403	CAG61435.1	-	similar to uniprot|Q12263 Saccharomyces cerevisiae YDR507c GIN4	inference=similar to AA sequence:UniProtKB:Q12263;product=CAGL0K05709p;db_xref=PhylomeDB:CAGL0K05709g;db_xref=GOA:Q6FMS0;db_xref=InterPro:IPR000719;db_xref=InterPro:IPR002290;db_xref=InterPro:IPR008271;db_xref=InterPro:IPR011009;db_xref=InterPro:IPR017441;db_xref=InterPro:IPR017442;db_xref=InterPro:IPR020636;db_xref=InterPro:IPR020671;db_xref=UniProtKB/TrEMBL:Q6FMS0;
1262		Cagl0K	742415	t	C	145	175	37	52	Ref[0];A[0];T[0];G[0];C[52]	.	CDS	CAGL0K07502g	.	CAG61510.1	+	no similarity possibly noncoding	product=CAGL0K07502p;db_xref=UniProtKB/TrEMBL:Q6FMJ7;
1263		Cagl0K	742444	a	C	15	107	35	6	Ref[0];A[0];T[0];G[0];C[6]	.	CDS	CAGL0K07502g	.	CAG61510.1	+	no similarity possibly noncoding	product=CAGL0K07502p;db_xref=UniProtKB/TrEMBL:Q6FMJ7;
1264		Cagl0K	742535	t	C	6	32	25	3	Ref[0];A[0];T[0];G[0];C[3]	.	CDS	CAGL0K07502g	.	CAG61510.1	+	no similarity possibly noncoding	product=CAGL0K07502p;db_xref=UniProtKB/TrEMBL:Q6FMJ7;
1265		Cagl0K	742549	t	C	6	40	25	3	Ref[0];A[0];T[0];G[0];C[3]	.	CDS	CAGL0K07502g	.	CAG61510.1	+	no similarity possibly noncoding	product=CAGL0K07502p;db_xref=UniProtKB/TrEMBL:Q6FMJ7;
1266		Cagl0K	742581	a	C	12	95	30	9	Ref[0];A[0];T[0];G[0];C[9]	.	CDS	CAGL0K07502g	.	CAG61510.1	+	no similarity possibly noncoding	product=CAGL0K07502p;db_xref=UniProtKB/TrEMBL:Q6FMJ7;
1267		Cagl0K	742583	t	C	12	95	30	10	Ref[0];A[0];T[0];G[0];C[10]	.	CDS	CAGL0K07502g	.	CAG61510.1	+	no similarity possibly noncoding	product=CAGL0K07502p;db_xref=UniProtKB/TrEMBL:Q6FMJ7;
1268		Cagl0K	742602	a	C	63	225	34	25	Ref[0];A[0];T[0];G[0];C[25]	.	CDS	CAGL0K07502g	.	CAG61510.1	+	no similarity possibly noncoding	product=CAGL0K07502p;db_xref=UniProtKB/TrEMBL:Q6FMJ7;
1269		Cagl0K	742625	*	*/-c	36	36	35	48	*[42];-c[3]	Other[3]	CDS	CAGL0K07502g	.	CAG61510.1	+	no similarity possibly noncoding	product=CAGL0K07502p;db_xref=UniProtKB/TrEMBL:Q6FMJ7;
1270		Cagl0K	1044406	*	*/+G	476	476	37	326	*[322];+G[4]	Other[0]	CDS	CAGL0K10714g	GL3C0391	CAG61645.1	+	(ohnolog of CAGL0A02046g), similar to uniprot|Q02805 Saccharomyces cerevisiae YOR018w ROD1 or uniprot|P43602 Saccharomyces cerevisiae YFR022w	inference=similar to AA sequence:UniProtKB:Q02805;ohnolog=CAGL0A02046g;product=CAGL0K10714p;db_xref=PhylomeDB:CAGL0K10714g;db_xref=InterPro:IPR011021;db_xref=InterPro:IPR011022;db_xref=InterPro:IPR014756;db_xref=UniProtKB/TrEMBL:Q6FM62;
1271		Cagl0L	1632	c	Y	41	41	35	984	Ref[742];A[0];T[242];G[0];C[742]	.	CDS	CAGL0L00157g	GL3M4601	CAR58057.1	-	no similarity	product=CAGL0L00157p;db_xref=UniProtKB/TrEMBL:B4UN41;
1272		Cagl0L	4644	a	R	228	228	31	940	Ref[587];A[587];T[0];G[353];C[0]	.	CDS	CAGL0L00157g	GL3M4601	CAR58057.1	-	no similarity	product=CAGL0L00157p;db_xref=UniProtKB/TrEMBL:B4UN41;
1273		Cagl0L	4657	g	S	228	228	34	866	Ref[558];A[39];T[0];G[558];C[269]	.	CDS	CAGL0L00157g	GL3M4601	CAR58057.1	-	no similarity	product=CAGL0L00157p;db_xref=UniProtKB/TrEMBL:B4UN41;
1274		Cagl0L	94123	t	C	225	225	37	605	Ref[0];A[0];T[0];G[0];C[605]	.	CDS	CAGL0L00737g	GL3C0753	CAG61776.1	-	similar to uniprot|P40528 Saccharomyces cerevisiae YIL047c SYG1	inference=similar to AA sequence:UniProtKB:P40528;product=CAGL0L00737p;db_xref=PhylomeDB:CAGL0L00737g;db_xref=GOA:Q6FLT8;db_xref=InterPro:IPR004331;db_xref=InterPro:IPR004342;db_xref=UniProtKB/TrEMBL:Q6FLT8;
1275		Cagl0L	941345	a	C	225	225	37	363	Ref[0];A[0];T[0];G[0];C[363]	.	CDS	CAGL0L08624g	GL3R0799	CAG62121.1	+	(ohnolog of CAGL0F02101g), similar to uniprot|P43583 Saccharomyces cerevisiae YFL007w	inference=similar to AA sequence:UniProtKB:P43583;ohnolog=CAGL0F02101g;product=CAGL0L08624p;db_xref=PhylomeDB:CAGL0L08624g;db_xref=InterPro:IPR021843;db_xref=UniProtKB/TrEMBL:Q6FKU3;
1276		Cagl0L	1263007	t	C	225	225	37	258	Ref[0];A[0];T[0];G[0];C[258]	.	CDS	CAGL0L11792g	GL3C0709	CAG62254.1	+	highly similar to uniprot|P04147 Saccharomyces cerevisiae YER165w PAB1 mRNA polyadenylate-binding protein	product=CAGL0L11792p;db_xref=PhylomeDB:CAGL0L11792g;db_xref=GOA:Q6FKG4;db_xref=HSSP:1CVJ;db_xref=InterPro:IPR000504;db_xref=InterPro:IPR002004;db_xref=InterPro:IPR006515;db_xref=InterPro:IPR012677;db_xref=UniProtKB/Swiss-Prot:Q6FKG4;
1277		Cagl0M	138521	c	T	225	225	37	529	Ref[0];A[0];T[529];G[0];C[0]	.	CDS	CAGL0M01210g	GL3R2270	CAG62373.1	-	similar to uniprot|P38803 Saccharomyces cerevisiae YHR085w	inference=similar to AA sequence:UniProtKB:P38803;product=CAGL0M01210p;db_xref=PhylomeDB:CAGL0M01210g;db_xref=GOA:Q6FK47;db_xref=UniProtKB/Swiss-Prot:Q6FK47;
1278		Cagl0M	393328	*	-aat/-aat	1112	25492	37	358	-aat[299];*[59]	Other[0]	CDS	CAGL0M03465g	GL3R0082	CAG62473.1	-	(ohnolog of CAGL0L07766g), highly similar to uniprot|P25613 Saccharomyces cerevisiae YCR010c SPG2 or uniprot|P32907 Saccharomyces cerevisiae YNR002c FUN34	ohnolog=CAGL0L07766g;product=CAGL0M03465p;db_xref=PhylomeDB:CAGL0M03465g;db_xref=GOA:Q6FJU7;db_xref=InterPro:IPR000791;db_xref=UniProtKB/TrEMBL:Q6FJU7;
1279		Cagl0M	926262	a	G	225	225	37	242	Ref[0];A[0];T[0];G[242];C[0]	.	CDS	CAGL0M09317g	GL3C0498	CAG62727.1	+	similar to uniprot|P47127 Saccharomyces cerevisiae YJR080c	inference=similar to AA sequence:UniProtKB:P47127;product=CAGL0M09317p;db_xref=PhylomeDB:CAGL0M09317g;db_xref=InterPro:IPR002838;db_xref=UniProtKB/TrEMBL:Q6FJ45;
1280		Cagl0M	1151034	g	A	225	225	37	348	Ref[0];A[348];T[0];G[0];C[0]	.	CDS	CAGL0M11616g	GL3C2394	CAG62826.1	-	similar to uniprot|Q12019 Saccharomyces cerevisiae YLR106c	inference=similar to AA sequence:UniProtKB:Q12019;product=CAGL0M11616p;db_xref=PhylomeDB:CAGL0M11616g;db_xref=GOA:Q6FIU8;db_xref=InterPro:IPR002035;db_xref=InterPro:IPR002078;db_xref=InterPro:IPR003593;db_xref=InterPro:IPR011704;db_xref=InterPro:IPR012099;db_xref=UniProtKB/TrEMBL:Q6FIU8;
1281		Cagl0M	1242726	a	C	225	225	37	213	Ref[0];A[0];T[0];G[1];C[212]	.	CDS	CAGL0M12474g	GL3R3426	CAG62865.1	+	similar to uniprot|P40523 Saccharomyces cerevisiae YIL055c	inference=similar to AA sequence:UniProtKB:P40523;product=CAGL0M12474p;db_xref=PhylomeDB:CAGL0M12474g;db_xref=UniProtKB/TrEMBL:Q6FIQ9;
1282		Cagl0M	1242859	*	*/+C	127	127	36	203	*[202];+C[1]	Other[0]	CDS	CAGL0M12474g	GL3R3426	CAG62865.1	+	similar to uniprot|P40523 Saccharomyces cerevisiae YIL055c	inference=similar to AA sequence:UniProtKB:P40523;product=CAGL0M12474p;db_xref=PhylomeDB:CAGL0M12474g;db_xref=UniProtKB/TrEMBL:Q6FIQ9;
1283		Cagl0E	288538	*	*/-t	3182	3182	37	434	*[314];-t[68]	Other[52]	intron	CAGL0E03069g	GL3R1298	CAG58742.2	-	highly similar to uniprot|P48234 Saccharomyces cerevisiae YGR145w ENP2	product=CAGL0E03069p;db_xref=PhylomeDB:CAGL0E03069g;db_xref=GOA:Q6FVC1;db_xref=InterPro:IPR011046;db_xref=InterPro:IPR012580;db_xref=InterPro:IPR015943;db_xref=UniProtKB/TrEMBL:Q6FVC1;
1284		Cagl0K	1049518	*	*/-a	1945	1945	37	337	*[267];-a[38]	Other[32]	intron	CAGL0K10780g	GL3R0671	CAG61648.1	+	highly similar to uniprot|P50094 Saccharomyces cerevisiae YML056c IMD4 or uniprot|P50095 Saccharomyces cerevisiae YLR432w IMD3 or uniprot|P38697 Saccharomyces cerevisiae YHR216w PUR5	product=CAGL0K10780p;db_xref=PhylomeDB:CAGL0K10780g;db_xref=GOA:Q6FM59;db_xref=InterPro:IPR000644;db_xref=InterPro:IPR001093;db_xref=InterPro:IPR005990;db_xref=InterPro:IPR013785;db_xref=InterPro:IPR015875;db_xref=InterPro:IPR018529;db_xref=UniProtKB/TrEMBL:Q6FM59;
1285		Cagl0L	444950	*	*/-a	733	733	36	209	*[189];-a[9]	Other[11]	intron	CAGL0L03846g	GL3C0001	CAG61911.1	-	highly similar to uniprot|P24783 Saccharomyces cerevisiae YNL112w DBP2 ATP-dependent RNA helicase of DEAD box family	product=CAGL0L03846p;db_xref=PhylomeDB:CAGL0L03846g;db_xref=GOA:Q6FLF3;db_xref=InterPro:IPR000629;db_xref=InterPro:IPR001650;db_xref=InterPro:IPR011545;db_xref=InterPro:IPR014001;db_xref=InterPro:IPR014014;db_xref=InterPro:IPR014021;db_xref=UniProtKB/Swiss-Prot:Q6FLF3;
1286		Cagl0B	1768	t	Y	140	140	30	945	Ref[656];A[0];T[656];G[0];C[289]	.	pseudogene	CAGL0B00110g	.	.	-	some similarities with uniprot|P08640 Saccharomyces cerevisiae YIR019c STA1 no start frameshiftpseudogene	.
1287		Cagl0B	1790	g	K	228	228	29	820	Ref[531];A[0];T[288];G[531];C[1]	.	pseudogene	CAGL0B00110g	.	.	-	some similarities with uniprot|P08640 Saccharomyces cerevisiae YIR019c STA1 no start frameshiftpseudogene	.
1288		Cagl0B	1857	*	+G/+G	1954	25546	36	642	+G[482];*[160]	Other[0]	pseudogene	CAGL0B00110g	.	.	-	some similarities with uniprot|P08640 Saccharomyces cerevisiae YIR019c STA1 no start frameshiftpseudogene	.
1289		Cagl0B	1872	c	Y	124	124	36	1064	Ref[827];A[0];T[234];G[2];C[827]	Gap[1]	pseudogene	CAGL0B00110g	.	.	-	some similarities with uniprot|P08640 Saccharomyces cerevisiae YIR019c STA1 no start frameshiftpseudogene	.
1290		Cagl0B	1961	c	S	118	118	25	2132	Ref[1606];A[1];T[0];G[525];C[1606]	.	pseudogene	CAGL0B00110g	.	.	-	some similarities with uniprot|P08640 Saccharomyces cerevisiae YIR019c STA1 no start frameshiftpseudogene	.
1291		Cagl0B	1980	g	R	121	121	26	1774	Ref[1244];A[530];T[0];G[1244];C[0]	.	pseudogene	CAGL0B00110g	.	.	-	some similarities with uniprot|P08640 Saccharomyces cerevisiae YIR019c STA1 no start frameshiftpseudogene	.
1292		Cagl0B	2305	a	R	228	228	36	1285	Ref[603];A[603];T[0];G[682];C[0]	.	pseudogene	CAGL0B00110g	.	.	-	some similarities with uniprot|P08640 Saccharomyces cerevisiae YIR019c STA1 no start frameshiftpseudogene	.
1293		Cagl0B	2308	a	R	228	228	36	1235	Ref[602];A[602];T[0];G[633];C[0]	.	pseudogene	CAGL0B00110g	.	.	-	some similarities with uniprot|P08640 Saccharomyces cerevisiae YIR019c STA1 no start frameshiftpseudogene	.
1294		Cagl0B	2345	t	Y	75	75	30	1000	Ref[736];A[0];T[736];G[0];C[264]	.	pseudogene	CAGL0B00110g	.	.	-	some similarities with uniprot|P08640 Saccharomyces cerevisiae YIR019c STA1 no start frameshiftpseudogene	.
1295		Cagl0B	2459	*	-t/-t	611	6838	35	191	-t[157];*[34]	Other[0]	pseudogene	CAGL0B00110g	.	.	-	some similarities with uniprot|P08640 Saccharomyces cerevisiae YIR019c STA1 no start frameshiftpseudogene	.
1296		Cagl0B	2568	*	-g/-g	1935	25679	37	645	-g[643];*[2]	Other[0]	pseudogene	CAGL0B00110g	.	.	-	some similarities with uniprot|P08640 Saccharomyces cerevisiae YIR019c STA1 no start frameshiftpseudogene	.
1297		Cagl0B	2614	g	S	84	228	37	875	Ref[168];A[0];T[0];G[168];C[707]	.	pseudogene	CAGL0B00110g	.	.	-	some similarities with uniprot|P08640 Saccharomyces cerevisiae YIR019c STA1 no start frameshiftpseudogene	.
1298		Cagl0B	2657	*	-c/-c	897	9664	37	287	-c[239];*[48]	Other[0]	pseudogene	CAGL0B00110g	.	.	-	some similarities with uniprot|P08640 Saccharomyces cerevisiae YIR019c STA1 no start frameshiftpseudogene	.
1299		Cagl0B	3151	g	A	225	225	37	829	Ref[0];A[829];T[0];G[0];C[0]	.	pseudogene	CAGL0B00110g	.	.	-	some similarities with uniprot|P08640 Saccharomyces cerevisiae YIR019c STA1 no start frameshiftpseudogene	.
1300		Cagl0B	3301	*	-t/-t	1067	13419	37	343	-t[297];*[46]	Other[0]	pseudogene	CAGL0B00110g	.	.	-	some similarities with uniprot|P08640 Saccharomyces cerevisiae YIR019c STA1 no start frameshiftpseudogene	.
1301		Cagl0B	3341	g	C	12	106	37	5	Ref[0];A[0];T[0];G[0];C[5]	.	pseudogene	CAGL0B00110g	.	.	-	some similarities with uniprot|P08640 Saccharomyces cerevisiae YIR019c STA1 no start frameshiftpseudogene	.
1302		Cagl0B	3403	*	-t/-t	347	4084	36	103	-t[74];*[29]	Other[0]	pseudogene	CAGL0B00110g	.	.	-	some similarities with uniprot|P08640 Saccharomyces cerevisiae YIR019c STA1 no start frameshiftpseudogene	.
1303		Cagl0B	3572	*	-a/-a	2486	31655	37	816	-a[726];*[90]	Other[0]	pseudogene	CAGL0B00110g	.	.	-	some similarities with uniprot|P08640 Saccharomyces cerevisiae YIR019c STA1 no start frameshiftpseudogene	.
1304		Cagl0B	3687	*	-c/-c	686	7529	36	216	-c[161];*[55]	Other[0]	pseudogene	CAGL0B00110g	.	.	-	some similarities with uniprot|P08640 Saccharomyces cerevisiae YIR019c STA1 no start frameshiftpseudogene	.
1305		Cagl0B	3918	*	-a/-a	2685	34762	37	888	-a[832];*[56]	Other[0]	pseudogene	CAGL0B00110g	.	.	-	some similarities with uniprot|P08640 Saccharomyces cerevisiae YIR019c STA1 no start frameshiftpseudogene	.
1306		Cagl0B	4010	*	-g/-g	2489	32186	37	817	-g[780];*[37]	Other[0]	pseudogene	CAGL0B00110g	.	.	-	some similarities with uniprot|P08640 Saccharomyces cerevisiae YIR019c STA1 no start frameshiftpseudogene	.
1307		Cagl0B	498888	*	-a/-a	2588	10287	37	850	-a[770];*[80]	Other[0]	pseudogene	CAGL0B05093g	.	.	+	some similarities with uniprot|P47179 Saccharomyces cerevisiae YJR151c no start frameshiftpseudogene	.
1308		Cagl0B	499013	*	-c/-c	545	5816	36	169	-c[102];*[67]	Other[0]	pseudogene	CAGL0B05093g	.	.	+	some similarities with uniprot|P47179 Saccharomyces cerevisiae YJR151c no start frameshiftpseudogene	.
1309		Cagl0B	499039	c	T	33	225	37	12	Ref[0];A[0];T[12];G[0];C[0]	.	pseudogene	CAGL0B05093g	.	.	+	some similarities with uniprot|P47179 Saccharomyces cerevisiae YJR151c no start frameshiftpseudogene	.
1310		Cagl0B	499276	*	-g/-g	398	4591	37	120	-g[86];*[34]	Other[0]	pseudogene	CAGL0B05093g	.	.	+	some similarities with uniprot|P47179 Saccharomyces cerevisiae YJR151c no start frameshiftpseudogene	.
1311		Cagl0B	501172	g	A	225	225	35	302	Ref[32];A[270];T[0];G[32];C[0]	.	pseudogene	CAGL0B05093g	.	.	+	some similarities with uniprot|P47179 Saccharomyces cerevisiae YJR151c no start frameshiftpseudogene	.
1312		Cagl0B	501343	*	-c/-c	1943	24858	37	635	-c[595];*[40]	Other[0]	pseudogene	CAGL0B05093g	.	.	+	some similarities with uniprot|P47179 Saccharomyces cerevisiae YJR151c no start frameshiftpseudogene	.
1313		Cagl0C	106089	*	+T/*	3466	9996	32	824	+T[1];*[823]	Other[0]	pseudogene	CAGL0C01067g	.	.	+	some similarities with uniprot|P08640 Saccharomyces cerevisiae YIR019c STA1 no start frameshiftpseudogene	.
1314		Cagl0C	106324	t	A	225	225	25	259	Ref[0];A[253];T[0];G[0];C[6]	.	pseudogene	CAGL0C01067g	.	.	+	some similarities with uniprot|P08640 Saccharomyces cerevisiae YIR019c STA1 no start frameshiftpseudogene	.
1315		Cagl0C	106923	a	R	45	45	30	873	Ref[531];A[531];T[0];G[342];C[0]	.	pseudogene	CAGL0C01067g	.	.	+	some similarities with uniprot|P08640 Saccharomyces cerevisiae YIR019c STA1 no start frameshiftpseudogene	.
1316		Cagl0C	106968	c	S	219	219	28	987	Ref[602];A[0];T[0];G[385];C[602]	.	pseudogene	CAGL0C01067g	.	.	+	some similarities with uniprot|P08640 Saccharomyces cerevisiae YIR019c STA1 no start frameshiftpseudogene	.
1317		Cagl0C	107112	c	S	71	71	29	766	Ref[573];A[0];T[0];G[193];C[573]	.	pseudogene	CAGL0C01067g	.	.	+	some similarities with uniprot|P08640 Saccharomyces cerevisiae YIR019c STA1 no start frameshiftpseudogene	.
1318		Cagl0C	107124	c	S	100	100	31	759	Ref[566];A[0];T[0];G[193];C[566]	.	pseudogene	CAGL0C01067g	.	.	+	some similarities with uniprot|P08640 Saccharomyces cerevisiae YIR019c STA1 no start frameshiftpseudogene	.
1319		Cagl0C	107136	c	S	58	58	33	764	Ref[571];A[0];T[0];G[193];C[571]	.	pseudogene	CAGL0C01067g	.	.	+	some similarities with uniprot|P08640 Saccharomyces cerevisiae YIR019c STA1 no start frameshiftpseudogene	.
1320		Cagl0C	107657	t	G	225	225	37	374	Ref[0];A[0];T[0];G[374];C[0]	.	pseudogene	CAGL0C01067g	.	.	+	some similarities with uniprot|P08640 Saccharomyces cerevisiae YIR019c STA1 no start frameshiftpseudogene	.
1321		Cagl0C	107669	t	G	225	225	37	308	Ref[0];A[0];T[0];G[308];C[0]	.	pseudogene	CAGL0C01067g	.	.	+	some similarities with uniprot|P08640 Saccharomyces cerevisiae YIR019c STA1 no start frameshiftpseudogene	.
1322		Cagl0C	107887	g	R	135	135	33	1313	Ref[960];A[351];T[1];G[960];C[0]	Gap[1]	pseudogene	CAGL0C01067g	.	.	+	some similarities with uniprot|P08640 Saccharomyces cerevisiae YIR019c STA1 no start frameshiftpseudogene	.
1323		Cagl0C	107902	c	T	225	225	34	1593	Ref[0];A[0];T[1593];G[0];C[0]	.	pseudogene	CAGL0C01067g	.	.	+	some similarities with uniprot|P08640 Saccharomyces cerevisiae YIR019c STA1 no start frameshiftpseudogene	.
1324		Cagl0D	3376	t	Y	145	145	26	1144	Ref[813];A[1];T[813];G[0];C[330]	.	pseudogene	CAGL0D00110g	.	.	-	some similarities with uniprot|P40442 Saccharomyces cerevisiae YIL169c frameshiftpseudogene	.
1325		Cagl0D	3398	g	K	103	103	29	1122	Ref[828];A[0];T[294];G[828];C[0]	.	pseudogene	CAGL0D00110g	.	.	-	some similarities with uniprot|P40442 Saccharomyces cerevisiae YIL169c frameshiftpseudogene	.
1326		Cagl0D	3457	t	W	190	190	33	952	Ref[591];A[358];T[591];G[1];C[2]	.	pseudogene	CAGL0D00110g	.	.	-	some similarities with uniprot|P40442 Saccharomyces cerevisiae YIL169c frameshiftpseudogene	.
1327		Cagl0D	3640	*	-c/-c	638	7925	37	200	-c[180];*[20]	Other[0]	pseudogene	CAGL0D00110g	.	.	-	some similarities with uniprot|P40442 Saccharomyces cerevisiae YIL169c frameshiftpseudogene	.
1328		Cagl0D	3816	a	C	225	225	30	1107	Ref[0];A[0];T[0];G[0];C[1107]	.	pseudogene	CAGL0D00110g	.	.	-	some similarities with uniprot|P40442 Saccharomyces cerevisiae YIL169c frameshiftpseudogene	.
1329		Cagl0D	3833	c	S	198	198	31	921	Ref[559];A[0];T[0];G[362];C[559]	.	pseudogene	CAGL0D00110g	.	.	-	some similarities with uniprot|P40442 Saccharomyces cerevisiae YIL169c frameshiftpseudogene	.
1330		Cagl0D	3889	t	K	85	85	36	367	Ref[283];A[0];T[283];G[84];C[0]	.	pseudogene	CAGL0D00110g	.	.	-	some similarities with uniprot|P40442 Saccharomyces cerevisiae YIL169c frameshiftpseudogene	.
1331		Cagl0D	3912	c	Y	228	228	35	232	Ref[148];A[0];T[84];G[0];C[148]	.	pseudogene	CAGL0D00110g	.	.	-	some similarities with uniprot|P40442 Saccharomyces cerevisiae YIL169c frameshiftpseudogene	.
1332		Cagl0D	3922	g	R	204	204	35	271	Ref[187];A[84];T[0];G[187];C[0]	.	pseudogene	CAGL0D00110g	.	.	-	some similarities with uniprot|P40442 Saccharomyces cerevisiae YIL169c frameshiftpseudogene	.
1333		Cagl0D	3941	*	-c/-c	622	10681	36	348	-c[253];*[95]	Other[0]	pseudogene	CAGL0D00110g	.	.	-	some similarities with uniprot|P40442 Saccharomyces cerevisiae YIL169c frameshiftpseudogene	.
1334		Cagl0D	4007	a	W	228	228	36	874	Ref[553];A[553];T[321];G[0];C[0]	.	pseudogene	CAGL0D00110g	.	.	-	some similarities with uniprot|P40442 Saccharomyces cerevisiae YIL169c frameshiftpseudogene	.
1335		Cagl0D	4462	*	-t/-t	2141	27489	37	701	-t[639];*[62]	Other[0]	pseudogene	CAGL0D00110g	.	.	-	some similarities with uniprot|P40442 Saccharomyces cerevisiae YIL169c frameshiftpseudogene	.
1336		Cagl0D	4572	*	-t/-t	635	7849	37	199	-t[168];*[31]	Other[0]	pseudogene	CAGL0D00110g	.	.	-	some similarities with uniprot|P40442 Saccharomyces cerevisiae YIL169c frameshiftpseudogene	.
1337		Cagl0D	4636	*	-t/-t	308	3679	36	90	-t[78];*[12]	Other[0]	pseudogene	CAGL0D00110g	.	.	-	some similarities with uniprot|P40442 Saccharomyces cerevisiae YIL169c frameshiftpseudogene	.
1338		Cagl0D	4912	t	Y	228	228	37	1319	Ref[700];A[0];T[700];G[0];C[619]	.	pseudogene	CAGL0D00110g	.	.	-	some similarities with uniprot|P40442 Saccharomyces cerevisiae YIL169c frameshiftpseudogene	.
1339		Cagl0D	651061	*	-a/-a	2816	35839	27	926	-a[896];*[30]	Other[0]	pseudogene	CAGL0D06732g	.	.	+	some similarities with uniprot|P47179 Saccharomyces cerevisiae YJR151c no start frameshiftpseudogene	.
1340		Cagl0D	651165	*	-g/-g	632	5622	29	198	-g[79];*[119]	Other[0]	pseudogene	CAGL0D06732g	.	.	+	some similarities with uniprot|P47179 Saccharomyces cerevisiae YJR151c no start frameshiftpseudogene	.
1341		Cagl0D	651377	*	-t/-t	1211	16153	28	391	-t[299];*[92]	Other[0]	pseudogene	CAGL0D06732g	.	.	+	some similarities with uniprot|P47179 Saccharomyces cerevisiae YJR151c no start frameshiftpseudogene	.
1342		Cagl0D	651494	*	-t/-t	5144	66595	25	1702	-t[1545];*[157]	Other[0]	pseudogene	CAGL0D06732g	.	.	+	some similarities with uniprot|P47179 Saccharomyces cerevisiae YJR151c no start frameshiftpseudogene	.
1343		Cagl0E	1481	t	W	228	228	36	1305	Ref[712];A[576];T[712];G[0];C[17]	.	pseudogene	CAGL0E00110g	.	.	-	some similarities with uniprot|P40442 Saccharomyces cerevisiae YIL169c frameshiftpseudogene	.
1344		Cagl0E	1533	t	W	187	187	32	1202	Ref[727];A[475];T[727];G[0];C[0]	.	pseudogene	CAGL0E00110g	.	.	-	some similarities with uniprot|P40442 Saccharomyces cerevisiae YIL169c frameshiftpseudogene	.
1345		Cagl0E	2171	g	T	225	225	35	309	Ref[0];A[0];T[309];G[0];C[0]	.	pseudogene	CAGL0E00110g	.	.	-	some similarities with uniprot|P40442 Saccharomyces cerevisiae YIL169c frameshiftpseudogene	.
1346		Cagl0E	2278	a	G	225	225	30	365	Ref[0];A[0];T[0];G[365];C[0]	.	pseudogene	CAGL0E00110g	.	.	-	some similarities with uniprot|P40442 Saccharomyces cerevisiae YIL169c frameshiftpseudogene	.
1347		Cagl0E	2283	t	G	225	225	31	404	Ref[0];A[0];T[0];G[404];C[0]	.	pseudogene	CAGL0E00110g	.	.	-	some similarities with uniprot|P40442 Saccharomyces cerevisiae YIL169c frameshiftpseudogene	.
1348		Cagl0E	2289	c	T	225	225	32	447	Ref[0];A[0];T[447];G[0];C[0]	.	pseudogene	CAGL0E00110g	.	.	-	some similarities with uniprot|P40442 Saccharomyces cerevisiae YIL169c frameshiftpseudogene	.
1349		Cagl0E	2356	t	G	225	225	34	400	Ref[0];A[0];T[0];G[400];C[0]	.	pseudogene	CAGL0E00110g	.	.	-	some similarities with uniprot|P40442 Saccharomyces cerevisiae YIL169c frameshiftpseudogene	.
1350		Cagl0E	2394	*	+T/+T	412	5112	34	128	+T[55];*[73]	Other[0]	pseudogene	CAGL0E00110g	.	.	-	some similarities with uniprot|P40442 Saccharomyces cerevisiae YIL169c frameshiftpseudogene	.
1351		Cagl0E	2618	c	T	225	225	27	499	Ref[1];A[0];T[498];G[0];C[1]	.	pseudogene	CAGL0E00110g	.	.	-	some similarities with uniprot|P40442 Saccharomyces cerevisiae YIL169c frameshiftpseudogene	.
1352		Cagl0E	2631	a	G	225	225	25	465	Ref[0];A[0];T[0];G[465];C[0]	.	pseudogene	CAGL0E00110g	.	.	-	some similarities with uniprot|P40442 Saccharomyces cerevisiae YIL169c frameshiftpseudogene	.
1353		Cagl0E	3497	c	T	199	225	29	376	Ref[74];A[0];T[302];G[0];C[74]	.	pseudogene	CAGL0E00110g	.	.	-	some similarities with uniprot|P40442 Saccharomyces cerevisiae YIL169c frameshiftpseudogene	.
1354		Cagl0E	3500	g	A	82	225	27	395	Ref[111];A[284];T[0];G[111];C[0]	.	pseudogene	CAGL0E00110g	.	.	-	some similarities with uniprot|P40442 Saccharomyces cerevisiae YIL169c frameshiftpseudogene	.
1355		Cagl0E	4632	*	-g/-g	809	9629	36	257	-g[229];*[28]	Other[0]	pseudogene	CAGL0E00110g	.	.	-	some similarities with uniprot|P40442 Saccharomyces cerevisiae YIL169c frameshiftpseudogene	.
1356		Cagl0F	1741	c	Y	199	199	34	997	Ref[658];A[0];T[339];G[0];C[658]	.	pseudogene	CAGL0F00110g	.	.	-	no similaritypseudogene	.
1357		Cagl0F	2306	*	+T/+T	1456	19314	37	486	+T[458];*[28]	Other[0]	pseudogene	CAGL0F00110g	.	.	-	no similaritypseudogene	.
1358		Cagl0F	2389	*	*/+G	9895	9895	35	866	*[865];+G[1]	Other[0]	pseudogene	CAGL0F00110g	.	.	-	no similaritypseudogene	.
1359		Cagl0F	2512	*	*/-a	1173	1173	34	378	*[375];-a[3]	Other[0]	pseudogene	CAGL0F00110g	.	.	-	no similaritypseudogene	.
1360		Cagl0F	3149	*	-t/-t	2102	28458	35	688	-t[546];*[142]	Other[0]	pseudogene	CAGL0F00110g	.	.	-	no similaritypseudogene	.
1361		Cagl0F	3175	t	A	225	225	36	2342	Ref[1];A[2339];T[1];G[2];C[0]	.	pseudogene	CAGL0F00110g	.	.	-	no similaritypseudogene	.
1362		Cagl0F	3268	*	-g/-g	1046	7179	34	558	-g[58];*[499]	Other[1]	pseudogene	CAGL0F00110g	.	.	-	no similaritypseudogene	.
1363		Cagl0F	3307	*	-g/-g	800	10144	37	254	-g[235];*[19]	Other[0]	pseudogene	CAGL0F00110g	.	.	-	no similaritypseudogene	.
1364		Cagl0F	3932	*	-c/-c	1595	20149	37	519	-c[459];*[60]	Other[0]	pseudogene	CAGL0F00110g	.	.	-	no similaritypseudogene	.
1365		Cagl0F	4408	*	-a/-a	2534	32037	37	832	-a[716];*[116]	Other[0]	pseudogene	CAGL0F00110g	.	.	-	no similaritypseudogene	.
1366		Cagl0G	2922	g	S	54	54	34	929	Ref[697];A[0];T[0];G[697];C[232]	.	pseudogene	CAGL0G00110g	.	.	-	no similarity frameshiftpseudogene	.
1367		Cagl0G	2945	g	R	142	142	30	1141	Ref[764];A[377];T[0];G[764];C[0]	.	pseudogene	CAGL0G00110g	.	.	-	no similarity frameshiftpseudogene	.
1368		Cagl0G	3677	t	Y	228	228	33	1309	Ref[699];A[0];T[699];G[0];C[610]	.	pseudogene	CAGL0G00110g	.	.	-	no similarity frameshiftpseudogene	.
1369		Cagl0G	4360	*	-t/-t	83	478	24	15	-t[2];*[13]	Other[0]	pseudogene	CAGL0G00110g	.	.	-	no similarity frameshiftpseudogene	.
1370		Cagl0G	4442	c	Y	16	16	30	776	Ref[523];A[0];T[253];G[0];C[523]	.	pseudogene	CAGL0G00110g	.	.	-	no similarity frameshiftpseudogene	.
1371		Cagl0H	4681	*	-c/-c	156	1593	37	66	-c[35];*[31]	Other[0]	pseudogene	CAGL0H00132g	.	.	-	some similarities with uniprot|P08640 Saccharomyces cerevisiae YIR019c STA1 no start frameshiftpseudogene	.
1372		Cagl0H	4764	*	-a/-a	7899	104953	37	2627	-a[2625];*[2]	Other[0]	pseudogene	CAGL0H00132g	.	.	-	some similarities with uniprot|P08640 Saccharomyces cerevisiae YIR019c STA1 no start frameshiftpseudogene	.
1373		Cagl0H	4800	c	A	221	225	36	2172	Ref[210];A[1962];T[0];G[0];C[210]	.	pseudogene	CAGL0H00132g	.	.	-	some similarities with uniprot|P08640 Saccharomyces cerevisiae YIR019c STA1 no start frameshiftpseudogene	.
1374		Cagl0H	4809	g	T	225	225	36	1916	Ref[136];A[0];T[1780];G[136];C[0]	.	pseudogene	CAGL0H00132g	.	.	-	some similarities with uniprot|P08640 Saccharomyces cerevisiae YIR019c STA1 no start frameshiftpseudogene	.
1375		Cagl0H	4860	*	-a/-a	572	1102	33	258	-a[136];*[122]	Other[0]	pseudogene	CAGL0H00132g	.	.	-	some similarities with uniprot|P08640 Saccharomyces cerevisiae YIR019c STA1 no start frameshiftpseudogene	.
1376		Cagl0H	5134	*	-a/-a	113	959	30	25	-a[25];*[0]	Other[0]	pseudogene	CAGL0H00132g	.	.	-	some similarities with uniprot|P08640 Saccharomyces cerevisiae YIR019c STA1 no start frameshiftpseudogene	.
1377		Cagl0H	6311	g	C	225	225	33	420	Ref[0];A[0];T[0];G[0];C[420]	.	pseudogene	CAGL0H00132g	.	.	-	some similarities with uniprot|P08640 Saccharomyces cerevisiae YIR019c STA1 no start frameshiftpseudogene	.
1378		Cagl0H	6323	g	C	225	225	33	434	Ref[0];A[0];T[0];G[0];C[434]	.	pseudogene	CAGL0H00132g	.	.	-	some similarities with uniprot|P08640 Saccharomyces cerevisiae YIR019c STA1 no start frameshiftpseudogene	.
1379		Cagl0H	6335	g	C	225	225	35	410	Ref[0];A[0];T[0];G[0];C[410]	.	pseudogene	CAGL0H00132g	.	.	-	some similarities with uniprot|P08640 Saccharomyces cerevisiae YIR019c STA1 no start frameshiftpseudogene	.
1380		Cagl0H	6719	*	-t/-t	2350	30499	37	824	-t[719];*[105]	Other[0]	pseudogene	CAGL0H00132g	.	.	-	some similarities with uniprot|P08640 Saccharomyces cerevisiae YIR019c STA1 no start frameshiftpseudogene	.
1381		Cagl0H	6844	*	-c/-c	1787	21449	37	583	-c[484];*[99]	Other[0]	pseudogene	CAGL0H00132g	.	.	-	some similarities with uniprot|P08640 Saccharomyces cerevisiae YIR019c STA1 no start frameshiftpseudogene	.
1382		Cagl0H	6902	*	-g/-g	1691	21364	37	551	-g[500];*[51]	Other[0]	pseudogene	CAGL0H00132g	.	.	-	some similarities with uniprot|P08640 Saccharomyces cerevisiae YIR019c STA1 no start frameshiftpseudogene	.
1383		Cagl0H	7020	c	T	225	225	37	834	Ref[0];A[0];T[834];G[0];C[0]	.	pseudogene	CAGL0H00132g	.	.	-	some similarities with uniprot|P08640 Saccharomyces cerevisiae YIR019c STA1 no start frameshiftpseudogene	.
1384		Cagl0H	7041	t	A	225	225	37	641	Ref[1];A[640];T[1];G[0];C[0]	.	pseudogene	CAGL0H00132g	.	.	-	some similarities with uniprot|P08640 Saccharomyces cerevisiae YIR019c STA1 no start frameshiftpseudogene	.
1385		Cagl0H	7071	*	-c/-c	1397	17134	37	453	-c[354];*[99]	Other[0]	pseudogene	CAGL0H00132g	.	.	-	some similarities with uniprot|P08640 Saccharomyces cerevisiae YIR019c STA1 no start frameshiftpseudogene	.
1386		Cagl0H	7118	*	-a/-a	1487	18059	37	483	-a[415];*[68]	Other[0]	pseudogene	CAGL0H00132g	.	.	-	some similarities with uniprot|P08640 Saccharomyces cerevisiae YIR019c STA1 no start frameshiftpseudogene	.
1387		Cagl0H	7207	*	-g/-g	2177	28088	37	713	-g[649];*[64]	Other[0]	pseudogene	CAGL0H00132g	.	.	-	some similarities with uniprot|P08640 Saccharomyces cerevisiae YIR019c STA1 no start frameshiftpseudogene	.
1388		Cagl0I	2652	t	K	117	117	32	2173	Ref[1605];A[0];T[1605];G[568];C[0]	.	pseudogene	CAGL0I00110g	.	.	-	some similarities with uniprot|P38894 Saccharomyces cerevisiae YHR211w FLO5 no start frameshiftpseudogene	.
1389		Cagl0I	2667	c	Y	104	104	30	2005	Ref[1539];A[0];T[466];G[0];C[1539]	.	pseudogene	CAGL0I00110g	.	.	-	some similarities with uniprot|P38894 Saccharomyces cerevisiae YHR211w FLO5 no start frameshiftpseudogene	.
1390		Cagl0I	2978	t	Y	29	29	36	1713	Ref[1277];A[119];T[1277];G[0];C[317]	.	pseudogene	CAGL0I00110g	.	.	-	some similarities with uniprot|P38894 Saccharomyces cerevisiae YHR211w FLO5 no start frameshiftpseudogene	.
1391		Cagl0I	3001	g	R	196	196	36	1948	Ref[1372];A[576];T[0];G[1372];C[0]	.	pseudogene	CAGL0I00110g	.	.	-	some similarities with uniprot|P38894 Saccharomyces cerevisiae YHR211w FLO5 no start frameshiftpseudogene	.
1392		Cagl0I	3040	a	R	141	141	36	1973	Ref[1456];A[1456];T[0];G[517];C[0]	.	pseudogene	CAGL0I00110g	.	.	-	some similarities with uniprot|P38894 Saccharomyces cerevisiae YHR211w FLO5 no start frameshiftpseudogene	.
1393		Cagl0I	3061	c	Y	21	21	36	1772	Ref[1411];A[0];T[360];G[1];C[1411]	.	pseudogene	CAGL0I00110g	.	.	-	some similarities with uniprot|P38894 Saccharomyces cerevisiae YHR211w FLO5 no start frameshiftpseudogene	.
1394		Cagl0I	3385	g	K	64	64	35	907	Ref[690];A[0];T[216];G[690];C[1]	.	pseudogene	CAGL0I00110g	.	.	-	some similarities with uniprot|P38894 Saccharomyces cerevisiae YHR211w FLO5 no start frameshiftpseudogene	.
1395		Cagl0I	3391	a	R	193	193	35	967	Ref[699];A[699];T[0];G[268];C[0]	.	pseudogene	CAGL0I00110g	.	.	-	some similarities with uniprot|P38894 Saccharomyces cerevisiae YHR211w FLO5 no start frameshiftpseudogene	.
1396		Cagl0I	7073	*	-t/-t	374	4135	37	112	-t[86];*[26]	Other[0]	pseudogene	CAGL0I00110g	.	.	-	some similarities with uniprot|P38894 Saccharomyces cerevisiae YHR211w FLO5 no start frameshiftpseudogene	.
1397		Cagl0I	7129	*	-g/-g	296	3547	36	86	-g[59];*[27]	Other[0]	pseudogene	CAGL0I00110g	.	.	-	some similarities with uniprot|P38894 Saccharomyces cerevisiae YHR211w FLO5 no start frameshiftpseudogene	.
1398		Cagl0J	2897	g	A	24	179	37	9	Ref[0];A[9];T[0];G[0];C[0]	.	pseudogene	CAGL0J00110g	.	.	-	no similarity frameshiftpseudogene	.
1399		Cagl0J	2925	*	-g/-g	581	7119	37	181	-g[173];*[8]	Other[0]	pseudogene	CAGL0J00110g	.	.	-	no similarity frameshiftpseudogene	.
1400		Cagl0J	2961	g	A	225	225	36	439	Ref[25];A[413];T[0];G[25];C[1]	.	pseudogene	CAGL0J00110g	.	.	-	no similarity frameshiftpseudogene	.
1401		Cagl0J	2973	c	T	225	225	36	515	Ref[0];A[0];T[515];G[0];C[0]	.	pseudogene	CAGL0J00110g	.	.	-	no similarity frameshiftpseudogene	.
1402		Cagl0J	2979	g	C	225	225	36	556	Ref[1];A[0];T[0];G[1];C[555]	.	pseudogene	CAGL0J00110g	.	.	-	no similarity frameshiftpseudogene	.
1403		Cagl0J	1188868	*	-a/-a	2438	32082	37	800	-a[757];*[43]	Other[0]	pseudogene	CAGL0J11990g	.	.	+	some similarities with uniprot|P38739 Saccharomyces cerevisiae YHL028w WSC4 no start frameshiftpseudogene	.
1404		Cagl0J	1189483	c	T	225	225	37	756	Ref[0];A[0];T[756];G[0];C[0]	.	pseudogene	CAGL0J11990g	.	.	+	some similarities with uniprot|P38739 Saccharomyces cerevisiae YHL028w WSC4 no start frameshiftpseudogene	.
1405		Cagl0J	1189614	*	-g/-g	554	6419	36	172	-g[109];*[63]	Other[0]	pseudogene	CAGL0J11990g	.	.	+	some similarities with uniprot|P38739 Saccharomyces cerevisiae YHL028w WSC4 no start frameshiftpseudogene	.
1406		Cagl0J	1189639	t	Y	121	121	37	26	Ref[17];A[0];T[17];G[1];C[8]	.	pseudogene	CAGL0J11990g	.	.	+	some similarities with uniprot|P38739 Saccharomyces cerevisiae YHL028w WSC4 no start frameshiftpseudogene	.
1407		Cagl0J	1189701	*	-g/-g	182	1849	34	48	-g[48];*[0]	Other[0]	pseudogene	CAGL0J11990g	.	.	+	some similarities with uniprot|P38739 Saccharomyces cerevisiae YHL028w WSC4 no start frameshiftpseudogene	.
1408		Cagl0J	1189763	*	-a/-a	65	319	37	9	-a[9];*[0]	Other[0]	pseudogene	CAGL0J11990g	.	.	+	some similarities with uniprot|P38739 Saccharomyces cerevisiae YHL028w WSC4 no start frameshiftpseudogene	.
1409		Cagl0J	1189787	a	G	24	183	37	9	Ref[0];A[0];T[0];G[9];C[0]	.	pseudogene	CAGL0J11990g	.	.	+	some similarities with uniprot|P38739 Saccharomyces cerevisiae YHL028w WSC4 no start frameshiftpseudogene	.
1410		Cagl0J	1190246	*	-c/-c	3218	42317	20	1060	-c[1051];*[8]	Other[1]	pseudogene	CAGL0J11990g	.	.	+	some similarities with uniprot|P38739 Saccharomyces cerevisiae YHL028w WSC4 no start frameshiftpseudogene	.
1411		Cagl0J	1190467	*	-a/-a	698	8777	37	220	-a[219];*[1]	Other[0]	pseudogene	CAGL0J11990g	.	.	+	some similarities with uniprot|P38739 Saccharomyces cerevisiae YHL028w WSC4 no start frameshiftpseudogene	.
1412		Cagl0J	1190862	t	A	225	225	36	8030	Ref[2];A[8026];T[2];G[1];C[1]	.	pseudogene	CAGL0J11990g	.	.	+	some similarities with uniprot|P38739 Saccharomyces cerevisiae YHL028w WSC4 no start frameshiftpseudogene	.
1413		Cagl0J	1190963	c	Y	228	228	35	7998	Ref[2890];A[1];T[5105];G[2];C[2890]	.	pseudogene	CAGL0J11990g	.	.	+	some similarities with uniprot|P38739 Saccharomyces cerevisiae YHL028w WSC4 no start frameshiftpseudogene	.
1414		Cagl0J	1190998	*	-g/-g	23260	297868	34	7849	-g[6393];*[1456]	Other[0]	pseudogene	CAGL0J11990g	.	.	+	some similarities with uniprot|P38739 Saccharomyces cerevisiae YHL028w WSC4 no start frameshiftpseudogene	.
1415		Cagl0J	1191155	a	R	5	130	29	13	Ref[4];A[4];T[0];G[9];C[0]	.	pseudogene	CAGL0J11990g	.	.	+	some similarities with uniprot|P38739 Saccharomyces cerevisiae YHL028w WSC4 no start frameshiftpseudogene	.
1416		Cagl0J	1191156	t	A	32	225	33	21	Ref[0];A[18];T[0];G[3];C[0]	.	pseudogene	CAGL0J11990g	.	.	+	some similarities with uniprot|P38739 Saccharomyces cerevisiae YHL028w WSC4 no start frameshiftpseudogene	.
1417		Cagl0J	1191212	g	S	72	72	34	473	Ref[344];A[0];T[0];G[344];C[129]	.	pseudogene	CAGL0J11990g	.	.	+	some similarities with uniprot|P38739 Saccharomyces cerevisiae YHL028w WSC4 no start frameshiftpseudogene	.
1418		Cagl0J	1191403	g	R	120	120	34	3305	Ref[2292];A[1013];T[0];G[2292];C[0]	.	pseudogene	CAGL0J11990g	.	.	+	some similarities with uniprot|P38739 Saccharomyces cerevisiae YHL028w WSC4 no start frameshiftpseudogene	.
1419		Cagl0J	1191405	a	R	114	114	34	3200	Ref[2485];A[2485];T[0];G[715];C[0]	.	pseudogene	CAGL0J11990g	.	.	+	some similarities with uniprot|P38739 Saccharomyces cerevisiae YHL028w WSC4 no start frameshiftpseudogene	.
1420		Cagl0J	1191419	a	M	91	225	33	2622	Ref[678];A[678];T[0];G[0];C[1944]	.	pseudogene	CAGL0J11990g	.	.	+	some similarities with uniprot|P38739 Saccharomyces cerevisiae YHL028w WSC4 no start frameshiftpseudogene	.
1421		Cagl0J	1191437	t	Y	228	228	31	2041	Ref[660];A[1];T[660];G[0];C[1380]	.	pseudogene	CAGL0J11990g	.	.	+	some similarities with uniprot|P38739 Saccharomyces cerevisiae YHL028w WSC4 no start frameshiftpseudogene	.
1422		Cagl0J	1191470	t	C	225	225	27	1324	Ref[0];A[0];T[0];G[0];C[1324]	.	pseudogene	CAGL0J11990g	.	.	+	some similarities with uniprot|P38739 Saccharomyces cerevisiae YHL028w WSC4 no start frameshiftpseudogene	.
1423		Cagl0J	1191605	t	Y	228	228	35	1405	Ref[875];A[0];T[875];G[0];C[530]	.	pseudogene	CAGL0J11990g	.	.	+	some similarities with uniprot|P38739 Saccharomyces cerevisiae YHL028w WSC4 no start frameshiftpseudogene	.
1424		Cagl0L	1072858	a	C	225	225	37	331	Ref[0];A[0];T[0];G[0];C[331]	.	pseudogene	CAGL0L09955g	.	.	+	highly similar to uniprot|P12611 Saccharomyces cerevisiae YOR043w WHI2 no start frameshiftpseudogene	.
1425		Cagl0M	1245765	*	-g/-g	611	7259	37	191	-g[177];*[14]	Other[0]	pseudogene	CAGL0M12496g	.	.	-	(ohnolog of CAGL0J03014g), similar to uniprot|P40522 Saccharomyces cerevisiae YIL056w frameshiftpseudogene	inference=similar to AA sequence:UniProtKB:P40522;
1426		Cagl0H	936294	t	G	225	225	34	579	Ref[42];A[0];T[42];G[537];C[0]	.	tRNA	CAGL0H09570r	.	.	-	tRNA Glu (TTC) cove score=62.99	.
1427		Cagl0H	965488	a	G	225	225	37	709	Ref[0];A[0];T[0];G[709];C[0]	.	tRNA	CAGL0H09900r	.	.	-	tRNA Val (TAC) cove score=72.86	.
