# Supplementary material for: Mechanisms of multidrug resistance caused by an Ipi1 mutation in the fungal pathogen Candida glabrata
Source: Springer Nature journal article supplement (doi:10.1038/s41467-025-56269-z), 2025-01-25
Supplement: MOESM4 [file 41467_2025_56269_MOESM4_ESM.xlsx]

## Sheet: Contents
Supplementary Data 2	Genome-wide gene expression profiles of C. glabrata wild-type and ipi1R70H strains in response to micafungin exposure determined by RNA-seq analysis
Data 2a	Differentially expressed genes in the wild-type strain in response to micafungin exposure
Data 2b	Enriched gene ontology (GO) terms for biological process (BP), molecular function (MF), and cellular component (CC) of proteins encoded by genes that were upregulated (A) and downregulated (B) in response to micafungin exposure in the wild-type strain
Data 2c	Differentially expressed genes in the ipi1R70H strain in response to micafungin exposure
Data 2d	Enriched gene ontology (GO) terms for biological process (BP), molecular function (MF), and cellular component (CC) of proteins encoded by genes that were upregulated (A) and downregulated (B) in response to micafungin exposure in the ipi1R70H strain
Data 2e	Differentially expressed genes in both the wild-type and ipi1R70H strains in response to micafungin exposure
Data 2f	Enriched gene ontology (GO) terms for biological process (BP), molecular function (MF), and cellular component (CC) of proteins encoded by genes that were upregulated (A) and downregulated (B) in response to micafungin exposure in both the wild-type and ipi1R70H strains
Data 2g	Differentially expressed genes only in the wild-type strain in response to micafungin exposure
Data 2h	Enriched gene ontology (GO) terms for biological process (BP), molecular function (MF), and cellular component (CC) of proteins encoded by genes that were upregulated (A) and downregulated (B) in response to micafungin exposure only in the wild-type strain
Data 2i	Differentially expressed genes only in the ipi1R70H strain in response to micafungin exposure
Data 2j	Enriched gene ontology (GO) terms for biological process (BP), molecular function (MF), and cellular component (CC) of proteins encoded by genes that were upregulated (A) and downregulated (B) in response to micafungin exposure only in the ipi1R70H strain

## Sheet: Data 2a
Data 2a	Differentially expressed genes in the wild-type strain in response to micafungin exposure
(A) Upregulated genes (log2 Fold change >1, adjusted p-value <0.05)
GeneID	log2FoldChange	baseMean	padj	Gene Name	Description
CAGL0I00220g	4.09095	381.126	3.72577e-26	EPA23	Uncharacterized ORF; Predicted GPI-linked adhesin-like protein
CAGL0I10010g	3.79917	1090.3	9.64566e-13	BTN2	Uncharacterized ORF; Ortholog(s) have SNARE binding activity, role in amino acid transport, intracellular protein transport, regulation of pH, retrograde transport, endosome to Golgi and cytosol, late endosome, perinuclear region of cytoplasm localization
CAGL0B02475g	3.45528	169.852	8.93341e-30	PHO84	Uncharacterized ORF; Ortholog(s) have inorganic phosphate transmembrane transporter activity, manganese ion transmembrane transporter activity and role in manganese ion transport, phosphate ion transport, polyphosphate metabolic process
CAGL0J06028g	3.21476	62.7904	5.58935e-06	MEP2	Uncharacterized ORF; Ortholog(s) have high affinity secondary active ammonium transmembrane transporter activity, methylammonium transmembrane transporter activity
CAGL0L05434g	3.11284	3707.45	1.32357e-12	NCA3	Uncharacterized ORF; Ortholog(s) have beta-glucosidase activity, role in fungal-type cell wall biogenesis, mitochondrion organization and fungal-type cell wall localization
CAGL0J11935g	2.97225	143.673	1.52476e-11	AWP3b	De novo genome assembly
CAGL0A04081g	2.96594	12725	3.80938e-18	NCW2	Uncharacterized ORF; Predicted GPI-linked cell wall protein
CAGL0L06776g	2.90214	1546.05	4.96952e-12	N/A	Uncharacterized ORF; Has domain(s) with predicted sequence-specific DNA binding, sequence-specific DNA binding transcription factor activity, zinc ion binding activity and role in regulation of transcription, DNA-dependent
CAGL0M07766g	2.83148	710.416	4.03884e-07	N/A	Uncharacterized ORF; Putative protein; gene is upregulated in azole-resistant strain
CAGL0E02409g	2.79327	1364.18	5.01279e-15	CSI2	Uncharacterized ORF; Ortholog(s) have cellular bud neck, fungal-type vacuole localization
CAGL0E02233g	2.67936	829.736	1.39054e-27	PCL1	Uncharacterized ORF; Ortholog(s) have cyclin-dependent protein kinase regulator activity
CAGL0K00715g	2.56702	8517.86	1.5497e-31	RTA1	Uncharacterized ORF; Putative protein involved in 7-aminocholesterol resistance; gene is upregulated in azole-resistant strain
CAGL0C04741g	2.5129	955.143	9.68045e-09	SOD1	Verified ORF; Cytosolic copper-zinc superoxide dismutase
CAGL0G09449g	2.50144	15013.3	3.90711e-26	CRH1	Verified ORF; Putative glycoside hydrolase; predicted GPI-anchor
CAGL0B00715g	2.4481	443.973	5.36924e-21	N/A	Unknown
CAGL0E02145g	2.43814	598.202	1.19107e-14	SKM1	Uncharacterized ORF; Ortholog(s) have protein kinase activity, role in cytokinetic cell separation, negative regulation of gene expression, protein phosphorylation, sterol import and nucleus, plasma membrane localization
CAGL0K04433g	2.34109	4233.79	2.88749e-11	PEF1	Uncharacterized ORF; Ortholog(s) have calcium ion binding, zinc ion binding activity, role in axial cellular bud site selection, bipolar cellular bud site selection and cellular bud neck, cytoplasm, nucleus localization
CAGL0I06644g	2.31553	404.48	0.000356058	SPI1	Uncharacterized ORF; Putative GPI-linked cell wall protein
CAGL0M12320g	2.2992	4850.49	6.06829e-18	FLC2	Uncharacterized ORF; Ortholog(s) have FAD transmembrane transporter activity, role in FAD transport, fungal-type cell wall biogenesis, protein folding, transmembrane transport and endoplasmic reticulum localization
CAGL0D01265g	2.29783	195.458	7.40744e-05	MT-I	Verified ORF; Copper-binding metallothionein, involved in sequestration of metal ions; inducible by copper and silver; gene used for molecular typing of <i>C. glabrata</i> strain isolates
CAGL0H05621g	2.2283	2215.33	1.30229e-14	RLM1	Uncharacterized ORF; Putative transcription factor with a predicted role in cell wall integrity
CAGL0K11946g	2.22279	3763.58	2.54187e-05	N/A	Uncharacterized ORF
CAGL0H00440g	2.21661	2060.57	8.80211e-17	YJR124C	Uncharacterized ORF; Has domain(s) with predicted role in transmembrane transport and integral to membrane localization
CAGL0D06050g	2.20645	1526.75	5.30122e-21	KCH1	Uncharacterized ORF; Ortholog(s) have fungal-type vacuole localization
CAGL0A03410g	2.20575	89.8295	7.46407e-09	N/A	Uncharacterized ORF
CAGL0L02827g	2.18921	1679.08	1.66748e-09	PTP2	Uncharacterized ORF; Ortholog(s) have protein tyrosine phosphatase activity
CAGL0M05049g	2.15471	4920.84	6.00415e-17	DFG5	Uncharacterized ORF; Putative glycoside hydrolase; predicted GPI-anchor
CAGL0C04763g	2.14963	2112.96	7.88389e-10	N/A	Uncharacterized ORF; Has domain(s) with predicted integral to membrane localization
CAGL0J07700g	2.14677	431.991	1.64041e-21	CWC25	Uncharacterized ORF; Ortholog(s) have role in nuclear mRNA splicing, via spliceosome and U2-type spliceosomal complex localization
CAGL0K04411g	2.09591	385.9	5.09855e-09	LST7	Uncharacterized ORF; Ortholog(s) have protein transporter activity, role in Golgi to plasma membrane transport, intracellular protein transport and cytosol, nucleus, vesicle coat localization
CAGL0B00946g	2.09387	4974.73	1.92433e-09	RNQ1	Uncharacterized ORF; Ortholog(s) have cytosol localization
CAGL0A03905g	2.08833	290.529	4.54093e-10	HMX1	Uncharacterized ORF; Ortholog(s) have heme oxygenase (decyclizing) activity and role in cellular iron ion homeostasis, heme catabolic process, response to carbon monoxide, response to oxidative stress
CAGL0J03256g	2.08153	2420.66	2.88526e-21	PTP3	Uncharacterized ORF; Ortholog(s) have protein tyrosine phosphatase activity
CAGL0K08558g	2.05364	11065.1	2.55521e-09	GFA1	Uncharacterized ORF; Ortholog(s) have glutamine-fructose-6-phosphate transaminase (isomerizing) activity
CAGL0K12892g	2.05221	4860.76	1.6901e-11	RGD2	Uncharacterized ORF; Ortholog(s) have Rho GTPase activator activity, role in establishment or maintenance of actin cytoskeleton polarity, small GTPase mediated signal transduction and cell cortex of cell tip, cellular bud neck, medial cortex localization
CAGL0D05434g	2.0457	1043.45	8.62137e-14	ROX1	Uncharacterized ORF; Has domain(s) with predicted DNA binding activity
CAGL0L13156g	2.01723	198.111	5.72566e-05	RFU1	Uncharacterized ORF; Ortholog(s) have enzyme inhibitor activity, role in regulation of ubiquitin homeostasis and endosome localization
CAGL0L00561g	2.00203	283.136	0.00019784	SSO1	Uncharacterized ORF; Ortholog(s) have SNAP receptor activity, phosphatidic acid binding, phosphatidylinositol-3,4-bisphosphate binding, phosphatidylinositol-3,5-bisphosphate binding, phosphatidylinositol-4,5-bisphosphate binding activity
CAGL0H04851g	1.96966	2599.53	2.93924e-07	PPZ1	Uncharacterized ORF; Ortholog(s) have 4-nitrophenylphosphatase activity, protein serine/threonine phosphatase activity and role in cellular protein localization, cellular sodium ion homeostasis, protein dephosphorylation
CAGL0B00726g	1.96905	52.6603	0.00574092	GLK1	Uncharacterized ORF; Ortholog(s) have glucokinase activity, role in glucose import, glycolysis, mannose metabolic process and cytosol, plasma membrane enriched fraction, soluble fraction localization
CAGL0M07381g	1.93715	7779.14	2.97096e-13	KTR6	Uncharacterized ORF; Ortholog(s) have mannosylphosphate transferase activity and role in fungal-type cell wall organization, protein N-linked glycosylation
CAGL0M04191g	1.92229	4124.33	9.66473e-09	YPS1	Verified ORF; Yapsin family aspartic protease; predicted GPI-anchor; complements cell wall defect phenotypes of S. cerevisiae yps1 mutant; regulation of pH homeostasis under acid conditions; induced by high temperature, Slt1- and Crz1p-dependent
CAGL0J11176g	1.89043	1775.16	6.32043e-13	TDA7	Uncharacterized ORF; Putative adhesin-like protein
CAGL0M08030g	1.88785	809.128	9.38037e-12	CPR7	Uncharacterized ORF; Ortholog(s) have peptidyl-prolyl cis-trans isomerase activity, unfolded protein binding activity, role in protein refolding, response to stress and cytosol localization
CAGL0K04169g	1.87727	7523.42	1.67474e-07	KSS1	Uncharacterized ORF; Ortholog(s) have MAP kinase activity, transcription factor binding activity
CAGL0H08173g	1.85696	1326.71	3.55069e-09	CIN5	Putative bZIP transcription factor of the yAP-1 family; null mutant shows decreased resistance to fluconazole and increased growth on glycerol, consistent with a possible role in repressing mitochondrial function in glucose-poor conditions
CAGL0G00858g	1.85073	1071.73	1.12103e-10	MID2	Uncharacterized ORF; Ortholog(s) have transmembrane signaling receptor activity
CAGL0I05654g	1.84877	1091.99	1.61969e-06	URK1	Uncharacterized ORF; Ortholog(s) have uridine kinase activity, role in pyrimidine-containing compound salvage and cell division site, cytosol, nucleus, spindle pole body localization
CAGL0J00539g	1.84577	9366.56	1.03979e-14	SLT2	Verified ORF; Mitogen-activated protein kinase with a role in cell wall integrity
CAGL0M06787g	1.84233	3144.44	9.229e-08	KTR5	Uncharacterized ORF; Ortholog(s) have role in fungal-type cell wall organization and cytosol, nucleus localization
CAGL0F00077g	1.83519	21.1573	0.0195748	EPA16	Uncharacterized ORF
CAGL0B00924g	1.83238	417.847	1.12103e-10	BIK1	Uncharacterized ORF; Ortholog(s) have microtubule binding, protein homodimerization activity
CAGL0D01628g	1.82202	828.308	6.20358e-11	BRR1	Uncharacterized ORF; Ortholog(s) have RNA binding activity, role in spliceosomal complex assembly and small nuclear ribonucleoprotein complex localization
CAGL0E03069g	1.82127	2119.76	0.00017311	ENP2	Uncharacterized ORF; Ortholog(s) have role in cellular response to drug, rRNA processing, ribosomal small subunit biogenesis and 90S preribosome, cytosol, nucleolus localization
CAGL0G08954g	1.80341	2485.26	2.31992e-11	YOL019W	Uncharacterized ORF; Ortholog(s) have fungal-type vacuole, plasma membrane localization
CAGL0H05709g	1.80091	799.077	0.000475096	NOG1	Uncharacterized ORF; Ortholog(s) have role in cellular response to drug, rRNA processing, ribosomal large subunit biogenesis, ribosomal subunit export from nucleus and nucleolus, preribosome, large subunit precursor, spindle localization
CAGL0J08437g	1.79857	2495.59	2.64747e-09	LPP1	Uncharacterized ORF; Ortholog(s) have phosphatidate phosphatase activity, role in phospholipid metabolic process and membrane localization
CAGL0J04554g	1.7883	2456.72	7.6214e-16	N/A	Uncharacterized ORF; Has domain(s) with predicted pyridoxal phosphate binding, transaminase activity and role in biosynthetic process, cellular amino acid metabolic process
CAGL0A04257g	1.78225	665.799	5.05246e-08	TOD6	Uncharacterized ORF; Ortholog(s) have sequence-specific DNA binding activity, role in regulation of transcription from RNA polymerase II promoter and Rpd3L complex, Rpd3L-Expanded complex, cytoplasm localization
CAGL0M07403g	1.7817	1774.84	1.0256e-09	OAZ1	Uncharacterized ORF; Ortholog(s) have ornithine decarboxylase inhibitor activity and role in negative regulation of translational frameshifting, regulation of proteasomal protein catabolic process
CAGL0J11506g	1.77547	7416.27	3.25521e-20	CHS1	Uncharacterized ORF; Ortholog(s) have chitin synthase activity and role in ascospore wall assembly, ascospore wall chitin biosynthetic process, cytokinesis, completion of separation
CAGL0I03608g	1.7455	3515.22	5.83387e-05	SAS10	Uncharacterized ORF; Ortholog(s) have role in cellular response to drug, endonucleolytic cleavage in 5'-ETS of tricistronic rRNA transcript (SSU-rRNA, 5.8S rRNA and LSU-rRNA), <a href="#GOsection">more</a>
CAGL0G04279g	1.74462	380.696	0.000159517	N/A	Uncharacterized ORF; Has domain(s) with predicted role in protein glycosylation
CAGL0M04719g	1.73701	4812.19	4.50873e-07	RRP36	Uncharacterized ORF; Ortholog(s) have role in cleavage involved in rRNA processing, maturation of SSU-rRNA from tricistronic rRNA transcript (SSU-rRNA, 5.8S rRNA, LSU-rRNA) and 90S preribosome, nucleolus localization
CAGL0E00517g	1.72615	1296.04	1.59136e-05	YCR087C-A	Uncharacterized ORF; Ortholog(s) have nucleolus localization
CAGL0M11462g	1.72519	5686.34	1.12103e-10	ICT1	Uncharacterized ORF; Ortholog(s) have lysophosphatidic acid acyltransferase activity and role in phosphatidic acid biosynthetic process
CAGL0F05329g	1.70149	13536.6	1.52301e-09	YDR210W	Uncharacterized ORF; Ortholog of <i>S. cerevisiae</i> : YDR210W
CAGL0B02755g	1.68937	3690.03	1.52301e-09	YLR361C-A	Uncharacterized ORF; Ortholog of <i>S. cerevisiae</i> : YLR361C-A
CAGL0E03025g	1.674	3069.84	3.36684e-06	ECL1	Uncharacterized ORF; Ortholog of <i>S. cerevisiae</i> : ECL1
CAGL0D01276g	1.67282	3327.03	5.0762e-15	OPY2	Uncharacterized ORF; Ortholog(s) have role in cell cycle arrest in response to pheromone, osmosensory signaling pathway and fungal-type vacuole, integral to membrane, plasma membrane localization
CAGL0H06853g	1.67225	1869.9	0.00337481	ADH6	Uncharacterized ORF; Putative NADP-dependent alcohol dehydrogenase VI; protein abundance increased in ace2 mutant cells
CAGL0G04433g	1.66671	164.289	9.42123e-06	PRM10	Uncharacterized ORF; Ortholog(s) have endoplasmic reticulum localization
CAGL0J02376g	1.66096	1003.61	9.0134e-05	FAF1	Uncharacterized ORF; Ortholog(s) have role in maturation of SSU-rRNA from tricistronic rRNA transcript (SSU-rRNA, 5.8S rRNA, LSU-rRNA) and cytoplasm, nucleolus localization
CAGL0M08206g	1.65402	2257.03	3.05991e-16	N/A	Uncharacterized ORF
CAGL0I04576g	1.64343	2428.27	5.98537e-05	APC11	Uncharacterized ORF; Ortholog(s) have ubiquitin-protein ligase activity, role in anaphase-promoting complex-dependent proteasomal ubiquitin-dependent protein catabolic process, protein ubiquitination and anaphase-promoting complex localization
CAGL0L02849g	1.62668	1823.84	6.40219e-07	RET1	Uncharacterized ORF; Ortholog(s) have DNA-directed RNA polymerase activity, role in tRNA transcription from RNA polymerase III promoter and DNA-directed RNA polymerase III complex, cytosol localization
CAGL0H05137g	1.62502	1880.26	4.65626e-06	ALD6	Uncharacterized ORF; Ortholog(s) have aldehyde dehydrogenase [NAD(P)+] activity, role in NADPH regeneration, acetate biosynthetic process, response to salt stress and cytosol, mitochondrion localization
CAGL0K12144g	1.62152	3084.79	0.000340892	FES1	Uncharacterized ORF; Putative Hsp70p nucleotide exchange factor; protein abundance decreased in ace2 mutant cells
CAGL0A02321g	1.59579	168.141	5.65121e-10	HXT5	Uncharacterized ORF; Ortholog(s) have fructose transmembrane transporter activity, glucose transmembrane transporter activity, mannose transmembrane transporter activity and role in glucose transport
CAGL0L01831g	1.59127	159.232	1.76709e-05	N/A	Unknown, inviable
CAGL0M09757g	1.58167	1051.79	8.17864e-06	YLR287C	Uncharacterized ORF; Ortholog(s) have cytoplasm localization
CAGL0G00924g	1.55901	1480.42	0.000588327	SGD1	Uncharacterized ORF; Gene used for molecular typing of <i>C. glabrata</i> strain isolates
CAGL0K08360g	1.55194	817.74	3.2529e-05	TRM2	Uncharacterized ORF; Ortholog(s) have double-stranded DNA specific 5'-3' exodeoxyribonuclease activity, single-stranded DNA specific endodeoxyribonuclease activity, tRNA (m5U54) methyltransferase activity
CAGL0G04411g	1.54566	700.472	0.00120584	UTP10	Uncharacterized ORF; Ortholog(s) have snoRNA binding activity
CAGL0H01419g	1.54512	1097.52	2.88478e-05	BFR2	Uncharacterized ORF; Ortholog(s) have role in rRNA processing and 90S preribosome, nucleolus localization
CAGL0D01562g	1.53869	2329.57	3.54676e-05	FCY1	Uncharacterized ORF; Ortholog(s) have cytosine deaminase activity, role in cytidine metabolic process, cytosine metabolic process, pyrimidine-containing compound salvage and cytoplasm, nucleus localization
CAGL0L09174g	1.53281	1344.12	4.2501e-11	SAD1	Uncharacterized ORF; Ortholog(s) have role in nuclear mRNA splicing, via spliceosome and nucleus localization
CAGL0J06088g	1.53081	450.303	1.78978e-10	YNL162W-A	Uncharacterized ORF; Ortholog(s) have cytoplasm, nucleus localization
CAGL0G06798g	1.52931	139.241	9.89354e-05	LSO1	Uncharacterized ORF; Ortholog of <i>S. cerevisiae</i> : LSO1
CAGL0L08547g	1.52785	5298.84	0.000211076	N/A	Unknown
CAGL0B02739g	1.52539	1732.83	1.00077e-13	STE11	Verified ORF; Mitogen activated protein kinase involved in control of hypertonic stress response, filamentous growth, and virulence
CAGL0M00902g	1.52513	740.62	7.87854e-08	DIF1	Uncharacterized ORF; Ortholog(s) have cytoplasm localization
CAGL0L03828g	1.5229	2795.8	0.000307585	CYB5	Uncharacterized ORF; Ortholog(s) have electron carrier activity, role in ergosterol biosynthetic process and endoplasmic reticulum membrane, microsome localization
CAGL0D01606g	1.51842	627.614	4.21923e-09	YMC1	Uncharacterized ORF; Ortholog(s) have organic acid transmembrane transporter activity, role in mitochondrial transport and mitochondrion localization
CAGL0A04411g	1.51234	608.832	8.64897e-10	SKT5	Uncharacterized ORF; Ortholog(s) have enzyme activator activity
CAGL0I01430g	1.51168	9469.79	1.70584e-06	ANB1	Uncharacterized ORF; Ortholog(s) have cytosol, nucleolus localization
CAGL0C02211g	1.50797	429.52	8.36081e-06	UTR2	Verified ORF; Putative glycoside hydrolase of the Crh family; predicted GPI-anchor
CAGL0M00748g	1.49942	842.058	6.47875e-13	ECM7	Verified ORF; Putative integral membrane protein required for high-affinity Ca2+ influx
CAGL0M06435g	1.49796	34.8886	0.00268864	PCH2	Uncharacterized ORF; Ortholog(s) have role in meiotic recombination checkpoint, reciprocal meiotic recombination and nucleolus localization
CAGL0A04037g	1.48953	1258.02	9.70156e-05	PWP1	Uncharacterized ORF; Ortholog(s) have role in rRNA processing and cytosol, nucleolus localization
CAGL0A00935g	1.48782	339.185	2.55795e-06	CWC24	Uncharacterized ORF; Ortholog(s) have role in generation of catalytic spliceosome for first transesterification step, snoRNA splicing and U2-type spliceosomal complex localization
CAGL0K00110g	1.48695	7208.53	4.9835e-12	AWP2	Verified ORF; Putative adhesin; predicted GPI-anchor
CAGL0J11154g	1.48489	1477.62	0.000598072	NOP13	Uncharacterized ORF; Ortholog(s) have nucleolus, preribosome localization
CAGL0K12804g	1.48269	1195.87	0.000422005	BUD20	Uncharacterized ORF; Ortholog(s) have role in cellular bud site selection and nucleolus localization
CAGL0J04972g	1.4813	45.4625	0.000329182	N/A	Uncharacterized ORF; Has domain(s) with predicted ATP binding, protein serine/threonine kinase activity and role in protein phosphorylation
CAGL0F07557g	1.47479	1210.22	1.92868e-07	YJU2	Uncharacterized ORF; Ortholog(s) have first spliceosomal transesterification activity, role in generation of catalytic spliceosome for first transesterification step and U2-type catalytic step 1 spliceosome localization
CAGL0E05786g	1.47054	898.796	1.11413e-05	LEA1	Uncharacterized ORF; Ortholog(s) have role in nuclear mRNA splicing, via spliceosome and U2 snRNP, U2-type prespliceosome, cytoplasm localization
CAGL0I01606g	1.46948	487.498	0.000440199	URB2	Uncharacterized ORF; Ortholog(s) have role in rRNA metabolic process, ribosome biogenesis and nucleolus localization
CAGL0L03872g	1.46741	3183.26	5.40033e-06	RPC19	Uncharacterized ORF; Ortholog(s) have DNA-directed RNA polymerase activity and role in tRNA transcription from RNA polymerase III promoter, transcription from RNA polymerase I promoter
CAGL0M11066g	1.4548	75.4511	0.0115456	CLB6	Uncharacterized ORF; Ortholog(s) have cyclin-dependent protein kinase regulator activity and role in G1/S transition of mitotic cell cycle, premeiotic DNA replication, regulation of S phase of mitotic cell cycle
CAGL0E02673g	1.45161	5140.61	5.12175e-05	UTP23	Uncharacterized ORF; Ortholog(s) have role in endonucleolytic cleavage in 5'-ETS of tricistronic rRNA transcript (SSU-rRNA, 5.8S rRNA and LSU-rRNA), <a href="#GOsection">more</a>
CAGL0B00638g	1.44622	889.269	7.90038e-08	POF1	Uncharacterized ORF; Ortholog(s) have ATPase activity, role in ER-associated protein catabolic process, invasive growth in response to glucose limitation, pseudohyphal growth and cytosol, nucleus localization
CAGL0H07271g	1.44525	169.434	6.6085e-06	IPK1	Uncharacterized ORF; Ortholog(s) have inositol pentakisphosphate 2-kinase activity, role in inositol phosphate biosynthetic process, nuclear-transcribed mRNA catabolic process, non-stop decay and nucleus localization
CAGL0E00583g	1.44432	250.664	1.25453e-05	TRX3	Uncharacterized ORF; Ortholog(s) have disulfide oxidoreductase activity, role in cellular response to oxidative stress and mitochondrion localization
CAGL0H01287g	1.44077	6268.13	6.43756e-09	SSD1	Uncharacterized ORF; Ortholog(s) have mRNA 5'-UTR binding, translation repressor activity, nucleic acid binding activity
CAGL0H06919g	1.44005	5242.84	6.80125e-11	ERO1	Uncharacterized ORF; Ortholog(s) have protein disulfide oxidoreductase activity, thiol oxidase activity, role in protein thiol-disulfide exchange and endoplasmic reticulum membrane localization
CAGL0F04829g	1.43775	1046.17	1.43679e-06	PIN3	Uncharacterized ORF; Ortholog(s) have role in actin cytoskeleton organization and cytoplasm, nucleus localization
CAGL0H07205g	1.42987	1150.66	9.85224e-05	RRP4	Uncharacterized ORF; Ortholog(s) have role in U4 snRNA 3'-end processing, exonucleolytic trimming to generate mature 3'-end of 5.8S rRNA from tricistronic rRNA transcript (SSU-rRNA, 5.8S rRNA and LSU-rRNA), <a href="#GOsection">more</a>
CAGL0C04565g	1.42406	122.642	0.0003394	JJJ3	Uncharacterized ORF; Ortholog(s) have ferrous iron binding activity, role in peptidyl-diphthamide biosynthetic process from peptidyl-histidine and cytosol, nucleus localization
CAGL0M09669g	1.42399	1023.95	0.000272577	RIM13	Uncharacterized ORF; Ortholog(s) have calcium-dependent cysteine-type endopeptidase activity
CAGL0L11066g	1.42343	4259.52	9.34436e-05	PLP2	Uncharacterized ORF; Ortholog(s) have G-protein beta/gamma-subunit complex binding, actin binding activity, role in positive regulation of transcription from RNA polymerase II promoter by pheromones, protein folding and cytoplasm localization
CAGL0K01441g	1.41851	2164.78	1.94416e-07	PRP11	Uncharacterized ORF; Ortholog(s) have RNA binding activity, role in spliceosomal complex assembly and U2-type prespliceosome localization
CAGL0E02893g	1.41811	1010.47	1.43722e-07	RRN6	Uncharacterized ORF; Ortholog(s) have RNA polymerase I regulatory region DNA binding, RNA polymerase I transcription factor binding activity and role in transcription of nuclear large rRNA transcript from RNA polymerase I promoter
CAGL0G03597g	1.41431	593.916	2.06329e-09	SHO1	Uncharacterized ORF; S. cerevisiae ortholog SHO1 has role in establishment of cell polarity, osmosensory signaling pathway, signal transduction involved in filamentous growth, cellular response to heat; osmosensitivity of CBS138 strain not seen in other strains
CAGL0I09350g	1.41329	3276.11	0.000113557	REI1	Uncharacterized ORF; Ortholog(s) have sequence-specific DNA binding activity and role in budding cell bud growth, mitotic cell cycle, nucleocytoplasmic transport, ribosomal large subunit biogenesis
CAGL0L08294g	1.40816	1125.14	1.17945e-07	AXL2	Uncharacterized ORF; Ortholog(s) have cellular bud neck localization
CAGL0J00473g	1.4071	2546.83	0.00396353	CIC1	Uncharacterized ORF; Ortholog(s) have protein binding, bridging activity, role in protein catabolic process, ribosomal large subunit biogenesis and nucleolus, preribosome, large subunit precursor, proteasome complex localization
CAGL0I04290g	1.40671	180.236	0.000604628	SUA5	Uncharacterized ORF; Ortholog(s) have single-stranded telomeric DNA binding activity, role in regulation of translational fidelity, telomere maintenance, threonylcarbamoyladenosine metabolic process and cytosol, nucleus localization
CAGL0L03047g	1.40161	628.308	0.000355758	DBP7	Uncharacterized ORF; Ortholog(s) have role in maturation of LSU-rRNA from tricistronic rRNA transcript (SSU-rRNA, 5.8S rRNA, LSU-rRNA) and nucleolus localization
CAGL0F05709g	1.39753	937.849	0.000794269	ATC1	Uncharacterized ORF; Ortholog(s) have role in bipolar cellular bud site selection, response to stress and nucleus localization
CAGL0H09218g	1.3932	117.134	1.72418e-06	SDT1	Uncharacterized ORF; Ortholog(s) have nucleotidase activity and role in pyrimidine base metabolic process
CAGL0F08811g	1.39257	2038.56	0.000131217	SNU71	Uncharacterized ORF; Ortholog(s) have RNA binding activity, role in nuclear mRNA splicing, via spliceosome and U1 snRNP, U2-type prespliceosome localization
CAGL0K09460g	1.3881	1024.91	0.000750115	PNO1	Uncharacterized ORF; Putative nucleolar protein required for pre-rRNA processing; gene is downregulated in azole-resistant strain
CAGL0I04444g	1.38516	2901.33	4.97388e-05	ADE1	Uncharacterized ORF; Ortholog(s) have phosphoribosylaminoimidazolesuccinocarboxamide synthase activity, role in 'de novo' IMP biosynthetic process, adenine biosynthetic process and cytosol, nucleus localization
CAGL0L05566g	1.38441	807.635	0.0025242	GCD14	Uncharacterized ORF; Ortholog(s) have tRNA (adenine-N1-)-methyltransferase activity, role in tRNA methylation and cytosol, nucleus, tRNA (m1A) methyltransferase complex localization
CAGL0M06809g	1.38354	533.07	1.35787e-05	TRM12	Uncharacterized ORF; Ortholog(s) have S-adenosylmethionine-dependent methyltransferase activity, transferase activity, transferring alkyl or aryl (other than methyl) groups activity and role in tRNA methylation, wybutosine biosynthetic process
CAGL0G07975g	1.3803	1487.9	0.00321413	DBP6	Uncharacterized ORF; Ortholog(s) have role in maturation of 5.8S rRNA from tricistronic rRNA transcript (SSU-rRNA, 5.8S rRNA, LSU-rRNA), maturation of LSU-rRNA from tricistronic rRNA transcript (SSU-rRNA, 5.8S rRNA, LSU-rRNA)
CAGL0M07634g	1.37613	413.343	0.00104703	SOK2	Uncharacterized ORF; Ortholog(s) have sequence-specific DNA binding, sequence-specific DNA binding transcription factor activity
CAGL0L12738g	1.37612	208.963	6.52193e-06	SGF11	Uncharacterized ORF; Ortholog(s) have enzyme activator activity, role in histone deubiquitination, regulation of transcription from RNA polymerase II promoter and DUBm complex, SAGA complex localization
CAGL0M06567g	1.37386	1876.95	9.78281e-05	FAL1	Uncharacterized ORF; Ortholog(s) have role in maturation of SSU-rRNA from tricistronic rRNA transcript (SSU-rRNA, 5.8S rRNA, LSU-rRNA) and nucleolus localization
CAGL0F00275g	1.36957	12067.5	0.000332603	CDC11	Uncharacterized ORF; Ortholog(s) have 1-phosphatidylinositol binding, GTP binding, structural molecule activity
CAGL0K00671g	1.36942	1694.65	0.00180564	RPS14B	Uncharacterized ORF; Ortholog(s) have SSU rRNA binding activity, role in maturation of SSU-rRNA from tricistronic rRNA transcript (SSU-rRNA, 5.8S rRNA, LSU-rRNA), ribosomal small subunit assembly and small-subunit processome localization
CAGL0M06325g	1.35545	324.859	3.47243e-05	SMP1	Uncharacterized ORF; Ortholog(s) have DNA binding, bending, sequence-specific DNA binding activity, role in positive regulation of transcription from RNA polymerase II promoter in response to osmotic stress and cytoplasm, nucleus localization
CAGL0K09284g	1.35472	1091.02	0.00280525	PWP2	Uncharacterized ORF; Ortholog(s) have snoRNA binding activity
CAGL0M07612g	1.35404	10840.8	0.000215755	FMS1	Uncharacterized ORF; Ortholog(s) have polyamine oxidase activity, role in pantothenate biosynthetic process, polyamine catabolic process and cytoplasm localization
CAGL0K09614g	1.35105	841.392	0.00428137	KRE33	Uncharacterized ORF; Ortholog(s) have role in negative regulation of G0 to G1 transition, ribosomal small subunit biogenesis and 90S preribosome, nucleolus localization
CAGL0E00979g	1.35071	1536.83	0.000153861	TRM82	Uncharacterized ORF; Ortholog(s) have tRNA (guanine-N7-)-methyltransferase activity, role in tRNA methylation and cytosol, nucleus, tRNA methyltransferase complex localization
CAGL0H05511g	1.34875	1576.57	0.00168169	RPS9A	Uncharacterized ORF; Ortholog(s) have rRNA binding, structural constituent of ribosome activity and role in maturation of SSU-rRNA from tricistronic rRNA transcript (SSU-rRNA, 5.8S rRNA, LSU-rRNA)
CAGL0E02937g	1.34644	3939.36	2.54187e-05	CGR1	Uncharacterized ORF; Ortholog(s) have role in cellular response to drug, rRNA processing and nucleolus, preribosome, large subunit precursor localization
CAGL0K08272g	1.34479	1181.24	9.02362e-07	YSR3	Uncharacterized ORF; Ortholog(s) have sphingosine-1-phosphate phosphatase activity, role in phospholipid dephosphorylation, sphingolipid biosynthetic process and endoplasmic reticulum localization
CAGL0M04279g	1.34232	1780.07	0.000937052	DIP2	Uncharacterized ORF; Ortholog(s) have snoRNA binding activity
CAGL0K11682g	1.34055	533.849	1.75637e-05	CIS1	Uncharacterized ORF; Ortholog(s) have role in mitochondrion degradation, piecemeal microautophagy of nucleus and pre-autophagosomal structure localization
CAGL0F01023g	1.33904	2484.28	0.00165082	NOP12	Uncharacterized ORF; Ortholog(s) have role in maturation of LSU-rRNA from tricistronic rRNA transcript (SSU-rRNA, 5.8S rRNA, LSU-rRNA) and nucleolus, preribosome localization
CAGL0K02387g	1.33739	2560.5	8.47269e-06	ROK1	Uncharacterized ORF; Ortholog(s) have RNA-dependent ATPase activity
CAGL0K11528g	1.33248	1031.75	2.2471e-05	APN1	Uncharacterized ORF; Ortholog(s) have 3'-tyrosyl-DNA phosphodiesterase activity, DNA-(apurinic or apyrimidinic site) lyase activity, double-stranded DNA specific 3'-5' exodeoxyribonuclease activity and role in base-excision repair
CAGL0L06314g	1.3277	416.181	0.00182034	ARX1	Uncharacterized ORF; Ortholog(s) have role in ribosomal large subunit biogenesis and cytosol, cytosolic large ribosomal subunit, nuclear envelope, nucleoplasm localization
CAGL0D02706g	1.32531	1413.16	0.00409924	RIX1	Uncharacterized ORF; Ortholog(s) have role in cellular response to drug, rRNA processing, ribosomal large subunit assembly, ribosomal subunit export from nucleus and nucleoplasm localization
CAGL0M03905g	1.3234	3103.49	0.000517935	KRI1	Uncharacterized ORF; Ortholog(s) have role in endonucleolytic cleavage in ITS1 to separate SSU-rRNA from 5.8S rRNA and LSU-rRNA from tricistronic rRNA transcript (SSU-rRNA, 5.8S rRNA, LSU-rRNA) and nucleolus localization
CAGL0E01067g	1.32159	1405.51	3.36684e-06	ACL4	Uncharacterized ORF; Ortholog(s) have role in ER-associated protein catabolic process and cytoplasm, nucleolus localization
CAGL0D04884g	1.31821	3437.26	0.00234432	RRP9	Uncharacterized ORF; Ortholog(s) have snoRNA binding activity, role in cellular response to drug and 90S preribosome, box C/D snoRNP complex, small-subunit processome localization
CAGL0J02750g	1.31792	4193.95	3.26983e-10	CAJ1	Uncharacterized ORF; Has domain(s) with predicted heat shock protein binding, unfolded protein binding activity and role in protein folding
CAGL0G05742g	1.31575	1482.53	0.000204931	NOP6	Uncharacterized ORF; Ortholog(s) have rRNA binding activity, role in ribosomal small subunit biogenesis and 90S preribosome, nucleolus localization
CAGL0M01760g	1.3054	2245	2.37315e-05	CDR1	Verified ORF; Multidrug transporter of ATP-binding cassette (ABC) superfamily, involved in resistance to azoles; expression regulated by Pdr1p; increased abundance in azole resistant strains; expression increased by loss of the mitochondrial genome
CAGL0I06226g	1.30088	232.991	6.65886e-06	JJJ2	Uncharacterized ORF; Ortholog(s) have cytoplasm, nucleus localization
CAGL0G02189g	1.30077	450.398	0.00175582	MTD1	Uncharacterized ORF; Putative methylenetetrahydrofolate dehydrogenase (NAD+); protein abundance increased in ace2 mutant cells
CAGL0J01045g	1.29852	2263.91	2.64954e-05	HCA4	Uncharacterized ORF; Ortholog(s) have ATP-dependent RNA helicase activity, role in rRNA processing and cytosol, nucleus localization
CAGL0K06215g	1.29797	1948.7	1.62329e-05	UTP6	Uncharacterized ORF; Ortholog(s) have snoRNA binding activity
CAGL0M05841g	1.29555	8248.67	0.00182034	KTR2	Uncharacterized ORF; Ortholog(s) have alpha-1,2-mannosyltransferase activity, mannosylphosphate transferase activity, role in cell wall mannoprotein biosynthetic process, protein N-linked glycosylation and Golgi apparatus localization
CAGL0H01683g	1.28852	1195.58	3.22516e-05	URC2	Uncharacterized ORF; Ortholog(s) have sequence-specific DNA binding activity and cytoplasm, nucleus localization
CAGL0E06292g	1.28662	76.424	0.00724621	N/A	Uncharacterized ORF; Has domain(s) with predicted GTP binding activity and role in small GTPase mediated signal transduction
CAGL0M04587g	1.28374	827.049	2.12676e-05	RMP1	Uncharacterized ORF; Ortholog(s) have ribonuclease MRP activity, role in mRNA cleavage, maturation of 5.8S rRNA from tricistronic rRNA transcript (SSU-rRNA, 5.8S rRNA, LSU-rRNA) and cytoplasm, nucleolus, ribonuclease MRP complex localization
CAGL0L04026g	1.28342	808.394	0.000129349	NCS2	Uncharacterized ORF; Ortholog(s) have role in invasive growth in response to glucose limitation, protein urmylation, pseudohyphal growth, tRNA wobble position uridine thiolation and cytosolic tRNA wobble base thiouridylase complex, nucleus localization
CAGL0L06842g	1.28228	631.777	0.000105563	THI3	Uncharacterized ORF; Ortholog(s) have carboxy-lyase activity
CAGL0K08250g	1.28214	1657.89	1.24995e-05	MRS4	Uncharacterized ORF; Ortholog(s) have iron ion transmembrane transporter activity, role in RNA splicing, mitochondrial iron ion transport and mitochondrial inner membrane, plasma membrane localization
CAGL0B02211g	1.2805	2462.55	3.73249e-11	CCH1	Verified ORF; Putative calcium transporter; subunit of a plasma membrane gated channel involved in Ca2+ uptake; N-glycosylated integral membrane protein; required for viability upon prolonged fluconazole stress
CAGL0I03630g	1.27965	927.587	0.000565828	RPC53	Uncharacterized ORF; Ortholog(s) have DNA-directed RNA polymerase activity, role in tRNA transcription from RNA polymerase III promoter and DNA-directed RNA polymerase III complex, cytosol localization
CAGL0E05522g	1.27831	550.155	0.00886853	YOR342C	Uncharacterized ORF; Ortholog(s) have cytoplasm, nucleus localization
CAGL0G07249g	1.27731	513.571	1.0501e-06	YOX1	Uncharacterized ORF; Ortholog(s) have RNA polymerase II regulatory region sequence-specific DNA binding, RNA polymerase II transcription factor binding transcription factor activity involved in negative regulation of transcription activity
CAGL0E05500g	1.27137	1064.22	0.0328492	RPA190	Uncharacterized ORF; Ortholog(s) have DNA-directed RNA polymerase activity
CAGL0H06237g	1.26874	137.833	0.0287815	LDS1	Uncharacterized ORF; Ortholog of <i>S. cerevisiae</i> : YAL018C
CAGL0K03663g	1.26638	5116.46	7.64629e-06	NCW1	Uncharacterized ORF; Ortholog(s) have endoplasmic reticulum localization
CAGL0E00759g	1.25347	1945.57	1.66569e-07	ARG82	Uncharacterized ORF; Ortholog(s) have inositol tetrakisphosphate 3-kinase activity, inositol tetrakisphosphate 6-kinase activity and inositol-1,3,4,5,6-pentakisphosphate kinase activity, <a href="#GOsection">more</a>
CAGL0B00374g	1.25211	929.272	7.82328e-05	ADF1	Uncharacterized ORF; Ortholog(s) have RNA polymerase II regulatory region DNA binding activity
CAGL0C05115g	1.25198	334.614	2.54187e-05	ARG1	Uncharacterized ORF; Argininosuccinate synthetase
CAGL0M01056g	1.24679	749.301	0.000932156	FCF1	Uncharacterized ORF; Ortholog(s) have role in endonucleolytic cleavage in 5'-ETS of tricistronic rRNA transcript (SSU-rRNA, 5.8S rRNA and LSU-rRNA), <a href="#GOsection">more</a>
CAGL0L07678g	1.24618	71.6559	0.0338367	DIM1	Uncharacterized ORF; Putative essential 18S rRNA dimethylase; gene is downregulated in azole-resistant strain
CAGL0D01914g	1.24488	878.915	3.49222e-06	SED5	Uncharacterized ORF; Ortholog(s) have SNAP receptor activity, role in ER to Golgi vesicle-mediated transport, intra-Golgi vesicle-mediated transport, vesicle fusion with Golgi apparatus and SNARE complex, cis-Golgi network, integral to membrane localization
CAGL0H06413g	1.24219	1308.09	1.13602e-05	CCW14	Verified ORF; Putative GPI-linked cell wall protein
CAGL0I00352g	1.24213	1618.91	2.7861e-06	RAD6	Uncharacterized ORF; Ortholog(s) have ubiquitin-protein ligase activity
CAGL0L02321g	1.23933	488.297	0.000120033	MET14	Uncharacterized ORF; Ortholog(s) have role in methionine biosynthetic process and cytosol, nucleus localization
CAGL0H02937g	1.23872	1311.69	0.00147969	UTP18	Uncharacterized ORF; Ortholog(s) have role in endonucleolytic cleavage in 5'-ETS of tricistronic rRNA transcript (SSU-rRNA, 5.8S rRNA and LSU-rRNA), <a href="#GOsection">more</a>
CAGL0G10109g	1.23631	697.296	2.13619e-05	RPC82	Uncharacterized ORF; Ortholog(s) have DNA-directed RNA polymerase activity, role in tRNA transcription from RNA polymerase III promoter and DNA-directed RNA polymerase III complex, spindle pole body localization
CAGL0M06545g	1.22974	1728.58	3.38157e-05	SSH4	Uncharacterized ORF; Ortholog(s) have role in protein targeting to vacuole involved in ubiquitin-dependent protein catabolic process via the multivesicular body sorting pathway and fungal-type vacuole localization
CAGL0I10670g	1.22867	161.419	0.0194723	NOC4	Uncharacterized ORF; Ortholog(s) have role in cellular response to drug, endonucleolytic cleavage in 5'-ETS of tricistronic rRNA transcript (SSU-rRNA, 5.8S rRNA and LSU-rRNA), <a href="#GOsection">more</a>
CAGL0E02431g	1.22772	3201.69	0.00113916	TOP1	Uncharacterized ORF; Ortholog(s) have DNA topoisomerase type I activity
CAGL0C01639g	1.22423	954.977	0.0143549	ENP1	Uncharacterized ORF; Ortholog(s) have snoRNA binding activity
CAGL0F06897g	1.22348	1873.82	5.56439e-11	NRE1	Uncharacterized ORF; Putative protein with alcohol dehydrogenase domain; gene is downregulated in azole-resistant strain
CAGL0A04323g	1.22267	1523.94	0.00281645	PTH2	Uncharacterized ORF; Ortholog(s) have aminoacyl-tRNA hydrolase activity, role in negative regulation of proteasomal ubiquitin-dependent protein catabolic process and mitochondrial outer membrane localization
CAGL0G00220g	1.22149	3141.64	1.75848e-06	BGL2	Uncharacterized ORF; Ortholog(s) have 1,3-beta-glucanosyltransferase activity, glucan endo-1,3-beta-D-glucosidase activity and role in adhesion to host, fungal-type cell wall organization, growth of symbiont in host, pathogenesis
CAGL0M00132g	1.22094	181.863	0.000231731	EPA12	Uncharacterized ORF; Putative adhesin-like cell wall protein
CAGL0J10912g	1.21822	1313.56	0.0132853	RRP3	Uncharacterized ORF; Ortholog(s) have RNA-dependent ATPase activity, role in maturation of SSU-rRNA from tricistronic rRNA transcript (SSU-rRNA, 5.8S rRNA, LSU-rRNA) and cytosol, nucleus localization
CAGL0J04466g	1.2181	10581.8	2.48265e-09	PUN1	Uncharacterized ORF; Ortholog(s) have role in fungal-type cell wall organization, protein oligomerization and Golgi apparatus, cell division site, cell tip, cellular bud, membrane raft, plasma membrane localization
CAGL0L09647g	1.21685	1302	0.000231731	SQT1	Uncharacterized ORF; Ortholog(s) have role in ribosomal large subunit assembly and cytosolic ribosome, nucleus localization
CAGL0G04983g	1.21679	512.446	2.33854e-05	YLR363W-A	Uncharacterized ORF; Ortholog(s) have nucleus localization
CAGL0K08338g	1.21588	20961	0.000517935	N/A	Uncharacterized ORF
CAGL0J11066g	1.21584	924.965	0.0136371	NOC3	Uncharacterized ORF; Ortholog(s) have chromatin binding activity, role in DNA-dependent DNA replication initiation, rRNA processing, response to drug and Noc2p-Noc3p complex localization
CAGL0M01430g	1.21486	1335.71	0.00157968	UTP4	Uncharacterized ORF; Ortholog(s) have role in maturation of SSU-rRNA from tricistronic rRNA transcript (SSU-rRNA, 5.8S rRNA, LSU-rRNA), positive regulation of transcription from RNA polymerase I promoter
CAGL0H10202g	1.21088	4884.43	0.00091883	TSC3	Uncharacterized ORF; Ortholog(s) have enzyme activator activity, role in 3-keto-sphinganine metabolic process and SPOTS complex, microsome localization
CAGL0G00286g	1.20922	5185.89	1.75637e-05	GAS1	Verified ORF; Putative glycoside hydrolase of the Gas/Phr family; predicted GPI-anchor
CAGL0L06754g	1.20808	2692.54	0.00656795	SUP45	Uncharacterized ORF; Ortholog(s) have translation release factor activity, codon specific activity, role in cytokinesis, translational termination and cytosol, nucleus, translation release factor complex localization
CAGL0L00341g	1.20737	8082.15	0.001993	EBP2	Uncharacterized ORF; Ortholog(s) have role in nuclear division, rRNA processing and nuclear periphery, nucleolus, preribosome, large subunit precursor, spindle pole body localization
CAGL0K00759g	1.20576	1983.88	0.0145004	ZPR1	Uncharacterized ORF; Protein with similarity to M. musculus zinc finger protein Zpr1p
CAGL0C04279g	1.20571	2491.48	0.0025584	RER2	Uncharacterized ORF; Ortholog(s) have dehydrodolichyl diphosphate synthase activity, role in ER to Golgi vesicle-mediated transport, dolichol biosynthetic process, protein glycosylation and endoplasmic reticulum localization
CAGL0H07557g	1.20477	2168.32	1.53811e-07	FZF1	Uncharacterized ORF; Ortholog(s) have RNA polymerase II core promoter proximal region sequence-specific DNA binding, <a href="#GOsection">more</a>
CAGL0F00561g	1.20377	787.824	0.0330841	RPA12	Uncharacterized ORF; Ortholog(s) have DNA-directed RNA polymerase activity and role in termination of RNA polymerase I transcription, transcription of nuclear large rRNA transcript from RNA polymerase I promoter
CAGL0J07766g	1.20289	448.334	0.0377187	RPA49	Uncharacterized ORF; Ortholog(s) have role in regulation of cell size, transcription elongation from RNA polymerase I promoter, transcription of nuclear large rRNA transcript from RNA polymerase I promoter and DNA-directed RNA polymerase I complex localization
CAGL0J10296g	1.20253	1347.61	0.00489091	APJ1	Uncharacterized ORF; Ortholog(s) have unfolded protein binding activity and mitochondrion, nucleus localization
CAGL0H03773g	1.1994	3305.99	0.0197395	RLP7	Uncharacterized ORF; Ortholog(s) have role in exonucleolytic trimming to generate mature 5'-end of 5.8S rRNA from tricistronic rRNA transcript (SSU-rRNA, 5.8S rRNA and LSU-rRNA), <a href="#GOsection">more</a>
CAGL0K03509g	1.19935	8263.69	4.16549e-07	HFD1	Uncharacterized ORF; Putative mitochondrial fatty aldehyde dehydrogenase; gene is upregulated in azole-resistant strain
CAGL0E02321g	1.19915	1508.73	7.76605e-05	PLB3	Uncharacterized ORF; Putative phospholipase B; predicted GPI-anchor
CAGL0K01551g	1.19903	654.885	0.0141083	DBP10	Uncharacterized ORF; Ortholog(s) have role in maturation of 5.8S rRNA from tricistronic rRNA transcript (SSU-rRNA, 5.8S rRNA, LSU-rRNA), maturation of LSU-rRNA from tricistronic rRNA transcript (SSU-rRNA, 5.8S rRNA, LSU-rRNA)
CAGL0E01925g	1.19775	677.415	0.00717053	TRM11	Uncharacterized ORF; Ortholog(s) have tRNA (guanine-N2-)-methyltransferase activity, role in tRNA methylation and cytosol, nucleus, tRNA (m2G10) methyltransferase complex localization
CAGL0M00682g	1.19691	208.08	0.00270843	NGK1	Uncharacterized ORF; Has domain(s) with predicted ATP binding, phosphotransferase activity, alcohol group as acceptor activity and role in carbohydrate metabolic process
CAGL0D03410g	1.19662	427.227	0.00050106	RRN7	Uncharacterized ORF; Ortholog(s) have RNA polymerase I CORE element sequence-specific DNA binding, TBP-class protein binding activity and role in transcription of nuclear large rRNA transcript from RNA polymerase I promoter
CAGL0M06897g	1.19625	89.0368	0.000134879	EFM6	Uncharacterized ORF; Ortholog(s) have cytoplasm localization
CAGL0F01177g	1.19532	565.483	0.00767156	YOL036W	Uncharacterized ORF; Ortholog of <i>S. cerevisiae</i> : YOL036W
CAGL0K09042g	1.19399	859.536	0.00705562	TMA16	Uncharacterized ORF; Ortholog(s) have nucleus, ribosome localization
CAGL0L08756g	1.19118	717.741	0.00277855	RRP12	Uncharacterized ORF; Ortholog(s) have 90S preribosome, nucleus, spindle pole body localization
CAGL0L08110g	1.18698	47766.3	0.00236095	RPL39	Uncharacterized ORF; Has domain(s) with predicted structural constituent of ribosome activity, role in translation and ribosome localization
CAGL0J02222g	1.18656	2766.64	0.000940704	NOP16	Uncharacterized ORF; Ortholog(s) have role in ribosomal large subunit biogenesis and nucleolus, preribosome, large subunit precursor localization
CAGL0F09009g	1.18492	1306.86	5.03503e-05	BCD1	Uncharacterized ORF; Ortholog(s) have role in snoRNA metabolic process and cytoplasm, nucleus localization
CAGL0J02816g	1.18468	676.098	0.00713131	TPA1	Uncharacterized ORF; Ortholog(s) have poly(A) RNA binding activity
CAGL0M06589g	1.18219	1144.26	0.000133557	DAS2	Uncharacterized ORF; Ortholog(s) have cytoplasm, nucleus localization
CAGL0F02541g	1.18207	5214.5	0.00179056	UTP5	Uncharacterized ORF; Ortholog(s) have role in cellular response to drug, maturation of SSU-rRNA from tricistronic rRNA transcript (SSU-rRNA, 5.8S rRNA, LSU-rRNA), meiosis, positive regulation of transcription from RNA polymerase I promoter
CAGL0B03619g	1.17941	1226.29	0.000530674	PRB1	Uncharacterized ORF; Ortholog(s) have serine-type endopeptidase activity
CAGL0G08294g	1.17867	481.134	1.0501e-06	GPN3	Uncharacterized ORF; Ortholog(s) have cytosol, nucleus localization
CAGL0J10978g	1.17616	1251.6	0.000447249	GIC2	Uncharacterized ORF; Ortholog(s) have Rho GTPase activator activity, Rho GTPase binding, phosphatidylinositol-4,5-bisphosphate binding activity and role in establishment of cell polarity, regulation of exit from mitosis
CAGL0G08272g	1.17551	1754.72	0.00242275	CCT6	Uncharacterized ORF; Ortholog(s) have unfolded protein binding activity, role in cellular response to drug, protein folding and chaperonin-containing T-complex, nucleus, soluble fraction localization
CAGL0K06567g	1.17326	9817.84	0.0270024	RPL27B	Uncharacterized ORF; Ortholog(s) have cytosol, nucleus localization
CAGL0K07161g	1.1729	403.848	4.21113e-08	N/A	Uncharacterized ORF; Has domain(s) with predicted catalytic activity and role in metabolic process
CAGL0K02761g	1.17074	1441.76	8.62946e-06	HSE1	Uncharacterized ORF; Ortholog(s) have ubiquitin binding activity and role in ascospore-type prospore assembly, protein targeting to vacuole involved in ubiquitin-dependent protein catabolic process via the multivesicular body sorting pathway
CAGL0H02189g	1.17048	1043.87	0.00591049	TMA23	Uncharacterized ORF; Ortholog(s) have role in ribosomal small subunit biogenesis and nucleolus, ribosome localization
CAGL0M12122g	1.1639	875.902	0.0121922	RBG1	Uncharacterized ORF; Ortholog(s) have role in cytoplasmic translation, filamentous growth and cytosol, nucleus, polysomal ribosome, polysome localization
CAGL0M00572g	1.16152	372.61	4.96124e-05	EFM3	Uncharacterized ORF; Ortholog(s) have cytoplasm localization
CAGL0M02805g	1.16139	748.292	0.0114726	NAN1	Uncharacterized ORF; Ortholog(s) have snoRNA binding activity and role in maturation of SSU-rRNA from tricistronic rRNA transcript (SSU-rRNA, 5.8S rRNA, LSU-rRNA), positive regulation of transcription from RNA polymerase I promoter
CAGL0L10890g	1.16044	399.303	0.0326449	YTM1	Uncharacterized ORF; Ortholog(s) have role in cellular response to biotic stimulus, cellular response to starvation and chromosome organization, <a href="#GOsection">more</a>
CAGL0M12496g	1.15947	429.207	0.00509328	VHR1	Transcriptional activator of genes involved in biotin metabolism; required for survival and proliferation in macrophages
CAGL0I08591g	1.15793	1268.66	0.000213089	YER158C	Uncharacterized ORF; Ortholog of <i>S. cerevisiae</i> : YER158C
CAGL0J07238g	1.15767	18357.9	0.032386	RPS12	Uncharacterized ORF; 40S ribosomal protein S12; protein abundance decreased in ace2 mutant cells
CAGL0L03846g	1.14916	657.045	0.0239593	DBP2	Uncharacterized ORF; Ortholog(s) have role in nuclear-transcribed mRNA catabolic process, nonsense-mediated decay, rRNA processing and cytosol, mitochondrion, nucleolus localization
CAGL0C04961g	1.14836	656.946	1.15605e-07	ECM27	Uncharacterized ORF; Ortholog(s) have role in fungal-type cell wall organization
CAGL0M07227g	1.1468	1598.92	0.00260672	UTP9	Uncharacterized ORF; Ortholog(s) have snoRNA binding activity and role in maturation of SSU-rRNA from tricistronic rRNA transcript (SSU-rRNA, 5.8S rRNA, LSU-rRNA), positive regulation of transcription from RNA polymerase I promoter
CAGL0I04466g	1.14645	1920.16	1.1989e-08	BUD14	Uncharacterized ORF; Ortholog(s) have protein phosphatase type 1 regulator activity
CAGL0E01903g	1.14399	926.868	0.00115118	TRM13	Uncharacterized ORF; Ortholog(s) have tRNA methyltransferase activity, role in tRNA methylation and cytoplasm, nucleus localization
CAGL0G02409g	1.14359	320.488	0.0203798	SRP40	Uncharacterized ORF; Ortholog(s) have nucleolus localization
CAGL0J11792g	1.14333	1993.8	1.11374e-05	RRN11	Uncharacterized ORF; Ortholog(s) have RNA polymerase I CORE element sequence-specific DNA binding, TBP-class protein binding activity and role in transcription of nuclear large rRNA transcript from RNA polymerase I promoter
CAGL0L02563g	1.14266	6332.06	0.00389104	AIM20	Uncharacterized ORF; Ortholog(s) have fungal-type vacuole localization
CAGL0B04169g	1.14051	1680.45	0.00374386	MRD1	Uncharacterized ORF; Ortholog(s) have role in endonucleolytic cleavage in 5'-ETS of tricistronic rRNA transcript (SSU-rRNA, 5.8S rRNA and LSU-rRNA), <a href="#GOsection">more</a>
CAGL0L10648g	1.13975	545.269	9.7495e-06	CLN1	Uncharacterized ORF; Ortholog(s) have cytoplasm, nucleus localization
CAGL0F00473g	1.13896	975.01	0.000127232	YAE1	Uncharacterized ORF; Ortholog(s) have cytoplasm, nucleus localization
CAGL0B00484g	1.1374	2881.99	0.00510976	SPB1	Uncharacterized ORF; Ortholog(s) have rRNA (guanine) methyltransferase activity, rRNA (uridine-2'-O-)-methyltransferase activity
CAGL0G00484g	1.13528	1012.36	0.00106038	N/A	Uncharacterized ORF; Ortholog(s) have nucleolus localization
CAGL0E02343g	1.13362	896.73	0.00823175	RCL1	Uncharacterized ORF; Ortholog(s) have endoribonuclease activity, enzyme activator activity
CAGL0J09746g	1.13246	339.044	0.00916679	TRM8	Uncharacterized ORF; Ortholog(s) have tRNA (guanine-N7-)-methyltransferase activity, role in tRNA methylation and nucleolus, tRNA methyltransferase complex localization
CAGL0K03839g	1.13207	841.091	0.000550981	YMR130W	Uncharacterized ORF; Ortholog(s) have cytosol, nucleus localization
CAGL0D04180g	1.13077	636.313	0.017415	UTP25	Uncharacterized ORF; Ortholog(s) have U3 snoRNA binding, rRNA binding activity, role in maturation of SSU-rRNA from tricistronic rRNA transcript (SSU-rRNA, 5.8S rRNA, LSU-rRNA) and nucleolus, small-subunit processome localization
CAGL0E04994g	1.12631	7671.31	0.0419309	RPL9A	Uncharacterized ORF; Ortholog(s) have structural constituent of ribosome activity, role in cytoplasmic translation and cytosolic large ribosomal subunit localization
CAGL0M09845g	1.12584	1362.22	0.00165082	UTP21	Uncharacterized ORF; Ortholog(s) have role in rRNA processing and Pwp2p-containing subcomplex of 90S preribosome, cell division site, cytosol, small-subunit processome, spindle pole body localization
CAGL0I00814g	1.12494	8038.11	0.0082156	RPP1A	Uncharacterized ORF; Ortholog(s) have structural constituent of ribosome activity and ribosome localization
CAGL0G09713g	1.12246	5819.75	0.00468058	RPS30B	Uncharacterized ORF; Ortholog(s) have cytosol, nucleus localization
CAGL0J07458g	1.12155	1314.56	0.000214505	CSL4	Uncharacterized ORF; Ortholog(s) have role in exonucleolytic trimming to generate mature 3'-end of 5.8S rRNA from tricistronic rRNA transcript (SSU-rRNA, 5.8S rRNA and LSU-rRNA), <a href="#GOsection">more</a>
CAGL0G01991g	1.12123	899.766	0.00748355	NOB1	Uncharacterized ORF; Ortholog(s) have SSU rRNA binding, endoribonuclease activity and role in maturation of SSU-rRNA from tricistronic rRNA transcript (SSU-rRNA, 5.8S rRNA, LSU-rRNA), proteasome assembly
CAGL0H07183g	1.11774	533.931	0.000119087	TRM5	Uncharacterized ORF; Ortholog(s) have tRNA (guanine) methyltransferase activity, role in tRNA methylation and mitochondrial matrix, nucleus localization
CAGL0G00154g	1.11715	12978.9	0.0224923	ZUO1	Uncharacterized ORF; Ortholog(s) have role in rRNA processing, regulation of translational fidelity, ribosomal subunit export from nucleus and cytosol, mitochondrion, nucleolus, polysome, ribosome localization
CAGL0K02233g	1.11444	5479.45	0.00115224	NSA2	Uncharacterized ORF; Ortholog(s) have role in maturation of 5.8S rRNA from tricistronic rRNA transcript (SSU-rRNA, 5.8S rRNA, LSU-rRNA), maturation of LSU-rRNA from tricistronic rRNA transcript (SSU-rRNA, 5.8S rRNA, LSU-rRNA)
CAGL0L00605g	1.11212	3546.89	1.83333e-07	CNB1	Verified ORF; Regulatory subunit of calcineurin, calcium/calmodulin-dependent Ser/Thr-specific protein phosphatase; regulates stress-responding transcription factor Crz1p; involved in thermotolerance, response to ER stress, cell wall integrity, virulence
CAGL0B04389g	1.10547	1942.54	0.000307585	CHS3	Verified ORF; Putative class IV chitin synthase; mutants display a significantly thickened cell wall mannoprotein layer; mutants are delayed in cell wall formation during protoplast regeneration
CAGL0M02409g	1.10328	2905.2	0.00734658	NOP53	Uncharacterized ORF; Ortholog(s) have rRNA binding activity, role in maturation of LSU-rRNA from tricistronic rRNA transcript (SSU-rRNA, 5.8S rRNA, LSU-rRNA), ribosomal large subunit export from nucleus and nucleolus localization
CAGL0J10802g	1.10277	1407.01	0.000596352	NOP10	Uncharacterized ORF; Ortholog(s) have RNA binding activity, role in cleavage involved in rRNA processing, rRNA pseudouridine synthesis, snRNA pseudouridine synthesis and box H/ACA snoRNP complex localization
CAGL0J06512g	1.09651	472.202	2.93843e-06	CAC2	Uncharacterized ORF; Ortholog(s) have histone binding activity
CAGL0L12782g	1.09576	751.378	0.000423038	DIG1	Uncharacterized ORF; Ortholog(s) have DNA binding, transcription factor binding activity
CAGL0J09966g	1.09362	2274.69	0.0329917	YDJ1	Uncharacterized ORF; Putative mitochondrial and ER import protein; protein abundance increased in ace2 mutant cells
CAGL0M05775g	1.0934	1382.28	0.00110159	NIP7	Uncharacterized ORF; Ortholog(s) have role in ribosomal large subunit biogenesis and cytosol, nucleolus, preribosome, large subunit precursor localization
CAGL0M02585g	1.09235	1008.31	0.00231445	SPP1	Uncharacterized ORF; Ortholog(s) have chromatin binding, histone methyltransferase activity (H3-K4 specific), methylated histone residue binding activity, role in chromatin silencing at telomere, histone H3-K4 methylation and Set1C/COMPASS complex localization
CAGL0B03091g	1.09225	182.97	0.000440199	BUD8	Uncharacterized ORF; Ortholog(s) have role in cellular bud site selection, pseudohyphal growth and cellular bud tip, incipient cellular bud site, plasma membrane localization
CAGL0J10252g	1.08904	753.474	0.0178807	IMP4	Uncharacterized ORF; Ortholog(s) have rRNA primary transcript binding, single-stranded telomeric DNA binding, snoRNA binding activity and Mpp10 complex, small-subunit processome localization
CAGL0D00836g	1.08847	1043.89	0.00737138	YDL063C	Uncharacterized ORF; Ortholog(s) have role in ribosomal large subunit biogenesis and cytosol, nucleus localization
CAGL0E02453g	1.08845	833.152	0.000137842	RPB11	Uncharacterized ORF; Ortholog(s) have DNA binding, DNA-directed RNA polymerase activity, RNA-directed RNA polymerase activity, role in termination of RNA polymerase II transcription and DNA-directed RNA polymerase II, core complex, cytosol localization
CAGL0M02607g	1.08564	896.18	5.14103e-06	GIP3	Uncharacterized ORF; Ortholog(s) have protein phosphatase 1 binding, protein phosphatase type 1 regulator activity and role in chromosome segregation, regulation of phosphoprotein phosphatase activity
CAGL0M00484g	1.08518	3350.93	0.00783259	XPT1	Uncharacterized ORF; Ortholog(s) have hypoxanthine phosphoribosyltransferase activity, xanthine phosphoribosyltransferase activity, role in XMP salvage, hypoxanthine metabolic process and endoplasmic reticulum localization
CAGL0G01540g	1.08463	805.653	0.000118684	NCE103	Verified ORF; Beta carbonic anhydrase with a predicted role in non-classical protein export; upregulated in azole-resistant strain; enzyme activity increased by amines and amino acids; protein abundance decreased in ace2 cells
CAGL0L11660g	1.08408	1092.55	0.0183966	RPO31	Uncharacterized ORF; Ortholog(s) have DNA-directed RNA polymerase activity, role in tRNA transcription from RNA polymerase III promoter and DNA-directed RNA polymerase III complex, cytoplasm localization
CAGL0K12606g	1.08394	465.678	5.88201e-05	MOB2	Uncharacterized ORF; Ortholog(s) have protein kinase activator activity
CAGL0G02629g	1.08328	774.074	0.0082074	BMT5	Uncharacterized ORF; Ortholog(s) have nucleolus localization
CAGL0J11220g	1.08284	7831.71	0.0399383	RPS3	Uncharacterized ORF; Ortholog(s) have DNA-(apurinic or apyrimidinic site) lyase activity, structural constituent of ribosome activity and role in rRNA export from nucleus
CAGL0J06864g	1.08039	592.303	0.0326449	MEI5	Uncharacterized ORF; Ortholog(s) have role in meiotic DNA recombinase assembly, reciprocal meiotic recombination and condensed nuclear chromosome localization
CAGL0E01155g	1.07944	398.766	0.00266995	RPA14	Uncharacterized ORF; Ortholog(s) have role in regulation of cell size, transcription of nuclear large rRNA transcript from RNA polymerase I promoter and DNA-directed RNA polymerase I complex localization
CAGL0M05027g	1.07616	3012.27	1.32887e-06	BCH1	Uncharacterized ORF; Ortholog(s) have role in Golgi to plasma membrane transport, fungal-type cell wall chitin biosynthetic process and cell division site, clathrin-coated vesicle, cytosol, exomer complex, nucleus, ribosome localization
CAGL0J05412g	1.07531	946.651	0.0119201	LSG1	Uncharacterized ORF; Ortholog(s) have role in ascospore formation, conjugation with cellular fusion, ribosomal large subunit assembly, ribosomal subunit export from nucleus and cytosol, mating projection tip localization
CAGL0E05478g	1.07494	2963.74	0.015385	RPA43	Uncharacterized ORF; Ortholog(s) have DNA-directed RNA polymerase activity, role in transcription of nuclear large rRNA transcript from RNA polymerase I promoter and DNA-directed RNA polymerase I complex localization
CAGL0I02354g	1.07448	994.53	0.00266433	DBP8	Uncharacterized ORF; Ortholog(s) have ATP-dependent RNA helicase activity
CAGL0L02541g	1.07412	1191.69	0.0022504	SMU2	Uncharacterized ORF; Ortholog(s) have cytoplasm localization
CAGL0A00781g	1.07407	2010.92	0.00067066	VPS8	Uncharacterized ORF; Ortholog(s) have GTPase binding, protein anchor activity and role in late endosome to vacuole transport via multivesicular body sorting pathway, protein targeting to vacuole
CAGL0H02079g	1.07404	2262.68	0.000320378	RPF1	Uncharacterized ORF; Ortholog(s) have rRNA primary transcript binding activity
CAGL0G06358g	1.07381	6633.63	0.00905671	SNC1	Uncharacterized ORF; Ortholog(s) have SNAP receptor activity and role in Golgi to plasma membrane transport, cell cycle cytokinesis, endocytosis, exocytosis, vesicle fusion
CAGL0D05500g	1.07229	2505.49	0.00824431	HGH1	Uncharacterized ORF; Ortholog(s) have cytoplasm localization
CAGL0E05874g	1.07224	1082.31	0.0175309	BMS1	Uncharacterized ORF; Ortholog(s) have GTP binding, GTPase activity, U3 snoRNA binding activity, role in cellular response to drug, rRNA processing, ribosome assembly and 90S preribosome, mitochondrion, nucleolus, spindle localization
CAGL0G00990g	1.07166	5804.54	0.0253584	RPP0	Uncharacterized ORF; Acidic ribosomal protein L10
CAGL0G02761g	1.06902	1572.18	0.00377819	DPH1	Uncharacterized ORF; Ortholog(s) have role in peptidyl-diphthamide biosynthetic process from peptidyl-histidine and cytosol, nucleus localization
CAGL0L00319g	1.06858	5442.02	9.78281e-05	ERG20	Uncharacterized ORF; Putative farnesyl pyrophosphate synthetase
CAGL0H10406g	1.06821	1389.54	0.0040544	TRM3	Uncharacterized ORF; Ortholog(s) have tRNA (guanine) methyltransferase activity, role in tRNA methylation and cytoplasm localization
CAGL0I03344g	1.06734	501.765	0.0018864	NRP1	Uncharacterized ORF; Ortholog(s) have cytoplasmic stress granule, nucleolus localization
CAGL0J06732g	1.06711	1283.07	0.000114064	BUL2	Uncharacterized ORF; Ortholog(s) have ubiquitin-ubiquitin ligase activity, role in protein monoubiquitination, protein polyubiquitination and cytoplasm, ubiquitin ligase complex localization
CAGL0G00264g	1.06637	3016.9	0.0154888	PXR1	Uncharacterized ORF; Ortholog(s) have telomerase inhibitor activity, role in box C/D snoRNA 3'-end processing, negative regulation of telomere maintenance via telomerase and nucleolus, nucleoplasm localization
CAGL0K01903g	1.06596	363.045	9.85224e-05	YDL012C	Uncharacterized ORF; Ortholog(s) have plasma membrane localization
CAGL0F02563g	1.06583	1498.34	0.0464958	HPT1	Uncharacterized ORF; Putative hypoxanthine guanine phosphoribosyl transferase
CAGL0H01243g	1.06468	857.685	1.83746e-05	HRQ1	Uncharacterized ORF; Ortholog(s) have nucleus localization
CAGL0J09328g	1.06464	1126.67	1.62103e-06	PCL2	Uncharacterized ORF; Ortholog(s) have cyclin-dependent protein kinase regulator activity
CAGL0L09669g	1.0625	778.184	0.0243814	URB1	Uncharacterized ORF; Ortholog(s) have role in maturation of 5.8S rRNA from tricistronic rRNA transcript (SSU-rRNA, 5.8S rRNA, LSU-rRNA), maturation of LSU-rRNA from tricistronic rRNA transcript (SSU-rRNA, 5.8S rRNA, LSU-rRNA)
CAGL0B00352g	1.06036	2344.61	0.0391153	KRR1	Uncharacterized ORF; Ortholog(s) have role in endonucleolytic cleavage in ITS1 to separate SSU-rRNA from 5.8S rRNA and LSU-rRNA from tricistronic rRNA transcript (SSU-rRNA, 5.8S rRNA, LSU-rRNA), regulation of mitotic cell cycle
CAGL0E01023g	1.05766	239.466	1.1713e-05	CWC15	Uncharacterized ORF; Ortholog(s) have RNA binding activity, role in nuclear mRNA cis splicing, via spliceosome and U2-type spliceosomal complex localization
CAGL0K06149g	1.0574	7208.28	0.0318497	RPS17B	Uncharacterized ORF; Ortholog(s) have role in ribosomal small subunit assembly and cytosol localization
CAGL0K02211g	1.05688	665.019	0.0331165	LCP5	Uncharacterized ORF; Ortholog(s) have RNA binding activity and nucleus localization
CAGL0F04433g	1.05625	1371.1	0.0304602	URA7	Uncharacterized ORF; CTP synthase
CAGL0E04488g	1.05299	458.982	0.000261328	AHC1	Uncharacterized ORF; Ortholog(s) have histone acetyltransferase activity, role in histone acetylation and Ada2/Gcn5/Ada3 transcription activator complex localization
CAGL0I01254g	1.05085	220.789	0.00018303	UBA4	Uncharacterized ORF; Ortholog(s) have URM1 activating enzyme activity, protein adenylyltransferase activity, thiosulfate sulfurtransferase activity
CAGL0E02585g	1.04917	531.204	0.00165082	RRP6	Uncharacterized ORF; Ortholog(s) have 3'-5'-exoribonuclease activity
CAGL0I07975g	1.04897	1556.73	0.0281612	BRX1	Uncharacterized ORF; Ortholog(s) have 5S rRNA binding, rRNA primary transcript binding activity
CAGL0H03597g	1.04701	8491.21	7.67945e-06	SSP120	Uncharacterized ORF; Ortholog(s) have Golgi apparatus, endoplasmic reticulum localization
CAGL0G09218g	1.04494	985.928	8.83675e-05	RSA1	Uncharacterized ORF; Ortholog(s) have role in ribosomal large subunit assembly and nucleoplasm localization
CAGL0M02629g	1.04323	1877.59	3.29006e-06	ISU1	Uncharacterized ORF; Ortholog(s) have 2 iron, 2 sulfur cluster binding, ferrous iron binding activity, role in cellular iron ion homeostasis, iron-sulfur cluster assembly, tRNA wobble uridine modification and mitochondrial matrix localization
CAGL0M00506g	1.0431	3322.27	0.000787281	NMD5	Uncharacterized ORF; Ortholog(s) have protein transporter activity, role in protein import into nucleus and cytosol, nuclear envelope localization
CAGL0H03685g	1.04073	13233.3	0.0421626	CBF5	Uncharacterized ORF; Ortholog(s) have pseudouridine synthase activity, role in box H/ACA snoRNA 3'-end processing, rRNA pseudouridine synthesis, snRNA pseudouridine synthesis and 90S preribosome, box H/ACA snoRNP complex, cytosol localization
CAGL0E06644g	1.03853	1078.54	0.0138896	EPA1	Verified ORF; Sub-telomerically encoded adhesin with a role in cell adhesion; glycosylphosphatidylinositol-anchored cell wall protein (GPI-CWP); N-terminal ligand binding domain binds to ligands containing a terminal galactose residue
CAGL0M01452g	1.03846	193.313	0.000980913	PEP7	Uncharacterized ORF; Ortholog(s) have phosphatidylinositol-3-phosphate binding activity
CAGL0M05159g	1.0371	1300.76	0.000690475	RNT1	Uncharacterized ORF; Ortholog(s) have RNA-directed RNA polymerase activity, ribonuclease III activity
CAGL0M11110g	1.03654	741.99	0.0284411	RRP1	Uncharacterized ORF; Ortholog(s) have role in rRNA processing and nucleolus, preribosome, large subunit precursor localization
CAGL0C03784g	1.0356	2271.53	0.000628082	URM1	Uncharacterized ORF; Ortholog(s) have protein tag activity and role in cell budding, cellular response to oxidative stress, invasive growth in response to glucose limitation, protein urmylation, tRNA wobble position uridine thiolation
CAGL0L06886g	1.03352	11161	0.029306	RPL13A	Uncharacterized ORF; Ortholog(s) have cell surface, cytosol localization
CAGL0M06039g	1.03263	954.436	0.000290193	POP7	Uncharacterized ORF; Ortholog(s) have ribonuclease MRP activity, ribonuclease P activity, role in intronic box C/D snoRNA processing, mRNA cleavage and nucleolar ribonuclease P complex, ribonuclease MRP complex localization
CAGL0K10362g	1.03011	410.16	0.000624866	ORT1	Uncharacterized ORF; Ortholog(s) have L-ornithine transmembrane transporter activity, role in arginine biosynthetic process, mitochondrial ornithine transport and mitochondrial envelope localization
CAGL0M06941g	1.02839	365.439	0.00606117	YNL022C	Uncharacterized ORF; Ortholog(s) have nucleolus localization
CAGL0J07898g	1.02744	3841.4	0.000434331	GIS2	Uncharacterized ORF; Ortholog(s) have mRNA binding, single-stranded DNA binding, translation regulator activity
CAGL0G00242g	1.02589	2912.64	0.000288194	YOR1	Uncharacterized ORF; Putative ABC transporter involved in multidrug efflux; gene is upregulated in azole-resistant strain
CAGL0J05346g	1.02494	1917.45	5.36881e-05	SRM1	Uncharacterized ORF; Ortholog(s) have Ran guanyl-nucleotide exchange factor activity, signal transducer activity
CAGL0G08734g	1.02427	448.123	0.0355683	RPL9B	Uncharacterized ORF; Ortholog(s) have structural constituent of ribosome activity, role in cytoplasmic translation and cytosolic large ribosomal subunit, nucleus localization
CAGL0H02057g	1.02315	1094.34	0.0201945	GAR1	Uncharacterized ORF; Ortholog(s) have box H/ACA snoRNA binding activity, role in cellular response to drug, snRNA pseudouridine synthesis and box H/ACA snoRNP complex localization
CAGL0J03916g	1.02103	1435.94	5.17065e-05	HES1	Uncharacterized ORF; Ortholog(s) have oxysterol binding, sterol transporter activity and role in endocytosis, exocytosis, maintenance of cell polarity, sterol transport
CAGL0G09537g	1.02097	145.178	0.00152732	IES4	Uncharacterized ORF; Putative adhesin-like protein
CAGL0F07095g	1.0203	784.932	0.0093006	NAB2	Uncharacterized ORF; Ortholog(s) have poly(A) RNA binding activity, role in mRNA polyadenylation, poly(A)+ mRNA export from nucleus, regulation of mRNA stability and cytoplasm, nucleus localization
CAGL0L01111g	1.01917	1179.85	0.000104497	SFA1	Uncharacterized ORF; Ortholog(s) have S-(hydroxymethyl)glutathione dehydrogenase activity, alcohol dehydrogenase (NAD) activity, hydroxymethylfurfural reductase (NADH) activity
CAGL0G00814g	1.01864	5199.76	6.64171e-06	CHS5	Uncharacterized ORF; Ortholog(s) have role in Golgi to plasma membrane transport, ascospore wall assembly, cell wall chitin catabolic process, cellular bud site selection, conjugation with cellular fusion, regulation of transcription, DNA-dependent
CAGL0J03476g	1.01598	879.396	0.0467584	RSA4	Uncharacterized ORF; Ortholog(s) have role in cellular response to drug, ribosomal large subunit assembly and nucleolus, ribosome localization
CAGL0E02717g	1.01571	714.246	4.37594e-05	TSR3	Uncharacterized ORF; Ortholog(s) have role in maturation of SSU-rRNA and cytoplasm, nucleus localization
CAGL0M04213g	1.0156	923.008	2.44975e-05	YLR126C	Uncharacterized ORF; Ortholog(s) have cytosol, nucleus localization
CAGL0J01485g	1.01533	675.68	3.22516e-05	OTU2	Uncharacterized ORF; Ortholog(s) have ubiquitin-specific protease activity, role in protein deubiquitination and cytosol, ribosome localization
CAGL0L11594g	1.01456	2024.96	0.00184621	RIO1	Uncharacterized ORF; Ortholog(s) have protein kinase activity, role in S phase of mitotic cell cycle, maturation of SSU-rRNA from tricistronic rRNA transcript (SSU-rRNA, 5.8S rRNA, LSU-rRNA), regulation of exit from mitosis and cytoplasm, nucleus localization
CAGL0M00946g	1.01426	1187.38	0.00501549	TSR2	Uncharacterized ORF; Ortholog(s) have role in maturation of SSU-rRNA from tricistronic rRNA transcript (SSU-rRNA, 5.8S rRNA, LSU-rRNA) and cytosol, nucleus localization
CAGL0H02299g	1.01292	209.614	0.000111242	YMR265C	Uncharacterized ORF; Ortholog(s) have nucleus localization
CAGL0J01265g	1.01257	631.602	0.0398977	UTP15	Uncharacterized ORF; Ortholog(s) have snoRNA binding activity and role in cellular response to drug, maturation of SSU-rRNA from tricistronic rRNA transcript (SSU-rRNA, 5.8S rRNA, LSU-rRNA), positive regulation of transcription from RNA polymerase I promoter
CAGL0L05170g	1.0114	3009.83	0.0200183	RRP14	Uncharacterized ORF; Ortholog(s) have role in ribosomal large subunit biogenesis, ribosomal small subunit biogenesis and cytosolic large ribosomal subunit, nucleolus localization
CAGL0K00957g	1.01122	2128.32	0.00073388	ELP2	Uncharacterized ORF; Ortholog(s) have role in protein urmylation, regulation of transcription from RNA polymerase II promoter, tRNA wobble uridine modification and Elongator holoenzyme complex, cytosol, nucleus localization
CAGL0I08547g	1.0111	239.928	0.0475228	MYG1	Uncharacterized ORF; Ortholog(s) have cytosol, nucleus localization
CAGL0K00781g	1.00974	1403.58	0.0152836	YGR210C	Uncharacterized ORF; Ortholog(s) have cytosol, nucleus, soluble fraction localization
CAGL0F05049g	1.00907	626.739	0.00644938	PUT7	Uncharacterized ORF; Ortholog(s) have mitochondrion localization
CAGL0F06501g	1.00889	954.492	4.36276e-05	ARG7	Uncharacterized ORF; Ortholog(s) have acetyl-CoA:L-glutamate N-acetyltransferase activity, glutamate N-acetyltransferase activity, role in fungal-type cell wall organization, ornithine biosynthetic process and mitochondrial matrix localization
CAGL0F08789g	1.00866	1627.67	0.000642142	MCY1	Uncharacterized ORF; Ortholog(s) have mitochondrial outer membrane localization
CAGL0D03278g	1.00656	2692.61	0.00111317	IRC25	Uncharacterized ORF; Ortholog(s) have role in chaperone-mediated protein complex assembly, nuclear-transcribed mRNA catabolic process, non-stop decay, proteasome assembly and intracellular localization
CAGL0K08976g	1.00452	1445.97	0.00153373	TRE2	Uncharacterized ORF; Ortholog(s) have role in protein targeting to vacuole involved in ubiquitin-dependent protein catabolic process via the multivesicular body sorting pathway
CAGL0E02123g	1.0045	529.68	0.00112512	PTH4	Uncharacterized ORF; Has domain(s) with predicted translation release factor activity and role in translational termination
CAGL0K03795g	1.00248	868.895	0.0346074	ECM16	Uncharacterized ORF; Ortholog(s) have RNA helicase activity, role in maturation of SSU-rRNA from tricistronic rRNA transcript (SSU-rRNA, 5.8S rRNA, LSU-rRNA) and 90S preribosome, mitochondrion, nucleolus, small-subunit processome localization
CAGL0G10021g	1.00069	1219.9	0.00165082	PZF1	Uncharacterized ORF; Ortholog(s) have RNA polymerase III type 1 promoter sequence-specific DNA binding, RNA polymerase III type 1 promoter sequence-specific DNA binding TFIIIC recruiting transcription factor activity
(B) Downregulated genes (log2 Fold change <-1, p-value <0.05)
GeneID	log2FoldChange	baseMean	padj	Gene Name	Description
CAGL0H06039g	-5.56814	15.9165	3.09959e-05	FLR2	Uncharacterized ORF
CAGL0J00451g	-5.13034	6887.14	1.30772e-25	TDH3	Verified ORF; Putative glyceraldehyde-3-phosphate dehydrogenase; protein differentially expressed in azole resistant strain; expression downregulated in biofilm vs planktonic cell culture
CAGL0K07337g	-5.04653	1374.15	5.36924e-21	N/A	Uncharacterized ORF
CAGL0M13266g	-4.94657	346.777	1.02807e-16	N/A	Uncharacterized ORF
CAGL0M01166g	-4.47017	3181.63	0.000192017	THI4	Uncharacterized ORF; Ortholog(s) have ferrous iron binding activity, role in mitochondrial genome maintenance, thiamine biosynthetic process, thiazole biosynthetic process and cytosol, nucleus localization
CAGL0J03080g	-4.35036	3495.93	5.8654e-27	RGI1	Uncharacterized ORF; Ortholog(s) have role in energy reserve metabolic process and cell periphery, cytoplasm, membrane fraction, nucleus localization
CAGL0G05632g	-4.26299	2391.83	7.50482e-18	YDL218W	Uncharacterized ORF
CAGL0H10076g	-4.05319	3034.05	8.18297e-52	YRO2	Uncharacterized ORF; Ortholog(s) have cellular bud, mitochondrion localization
CAGL0F08261g	-4.03949	2551.98	5.07707e-12	ENO1	Uncharacterized ORF; Ortholog(s) have high molecular weight kininogen binding, phosphopyruvate hydratase activity
CAGL0F04631g	-3.94713	4632.03	6.3771e-14	MOH1	Uncharacterized ORF; Ortholog of <i>S. cerevisiae</i> : MOH1, <i>C. albicans SC5314</i> : orf19.3369/MOH1, <i>C. parapsilosis CDC317</i> : CPAR2_403470 and <i>Candida tenuis NRRL Y-1498</i> : CANTEDRAFT_113777
CAGL0J04202g	-3.89703	4850.29	2.87901e-10	HSP12	Verified ORF; Heat shock protein; gene is upregulated in azole-resistant strain; expression upregulated in biofilm vs planktonic cell culture
CAGL0B01875g	-3.88264	4169.13	7.46476e-13	COX26	Uncharacterized ORF; Ortholog(s) have mitochondrial inner membrane, mitochondrial respirasome, mitochondrial respiratory chain complex IV localization
CAGL0G05269g	-3.88099	3458.09	8.64453e-05	FMP16	Uncharacterized ORF; Putative mitochondrial protein; gene is downregulated in azole-resistant strain
CAGL0E01353g	-3.78422	7539.19	1.04474e-34	N/A	Uncharacterized ORF; Putative high-affinity zinc transporter; gene is downregulated in azole-resistant strain
CAGL0H02695g	-3.72588	2892.58	3.91543e-45	GLG1	Uncharacterized ORF; Ortholog(s) have glycogenin glucosyltransferase activity and role in glycogen biosynthetic process
CAGL0I00550g	-3.69556	669.679	5.0856e-25	YLR297W	Uncharacterized ORF; Ortholog of <i>S. cerevisiae</i> : YLR297W
CAGL0K04301g	-3.63627	1511.32	4.56574e-43	FMP48	Uncharacterized ORF; Putative mitochondrial Ser/Thr protein kinase; gene is upregulated in azole-resistant strain
CAGL0E00341g	-3.6042	8.74916	0.00632266	HMRA1	Uncharacterized ORF; Mating type protein a1; differentially spliced transcript; expressed in both MATa and MATalpha strains
CAGL0H04037g	-3.58646	1527.24	4.32744e-22	GAC1	Uncharacterized ORF; Ortholog(s) have heat shock protein binding activity, role in glycogen metabolic process, meiosis, mitotic cell cycle spindle assembly checkpoint, response to heat and protein phosphatase type 1 complex localization
CAGL0H00704g	-3.4712	10506.3	8.37641e-25	ICY2	Uncharacterized ORF; Ortholog(s) have role in mitochondrion degradation
CAGL0A03102g	-3.38101	799.844	7.27645e-14	ARO10	Uncharacterized ORF; Ortholog(s) have phenylpyruvate decarboxylase activity
CAGL0A02002g	-3.29745	2819.81	3.34143e-08	YOL024W	Uncharacterized ORF; Ortholog of <i>S. cerevisiae</i> : YOL024W
CAGL0D04686g	-3.29717	207.305	7.05087e-11	AXL1	Uncharacterized ORF; Ortholog(s) have metalloendopeptidase activity, role in axial cellular bud site selection, peptide pheromone maturation and cellular bud neck, mating projection tip, peripheral to membrane of membrane fraction localization
CAGL0H02585g	-3.2379	2466.42	5.24523e-25	GAD1	Uncharacterized ORF; Ortholog(s) have calmodulin binding activity, role in cellular response to oxidative stress, glutamate catabolic process and cytoplasm localization
CAGL0H08778g	-3.20789	719.818	5.80225e-19	PUF2	Uncharacterized ORF; Ortholog(s) have mRNA binding activity, role in nuclear-transcribed mRNA catabolic process, deadenylation-dependent decay and cytoplasm localization
CAGL0L06094g	-3.19423	3229.41	2.79027e-24	STR3	Uncharacterized ORF; Putative cystathionine beta-lyase; gene is upregulated in azole-resistant strain
CAGL0G09603g	-3.18104	786.539	6.24179e-26	YOR186W	Uncharacterized ORF; Putative protein; gene is upregulated in azole-resistant strain
CAGL0C02519g	-3.09981	980.472	6.66924e-22	MIG3	Uncharacterized ORF; Ortholog(s) have RNA polymerase II core promoter proximal region sequence-specific DNA binding, <a href="#GOsection">more</a>
CAGL0J06050g	-3.06973	4589.15	1.9571e-22	YGP1	Uncharacterized ORF; Ortholog(s) have role in cell wall assembly and extracellular region localization
CAGL0L12122g	-3.04395	6.14198	0.0178833	ISC10	Uncharacterized ORF; Ortholog(s) have role in sporulation resulting in formation of a cellular spore
CAGL0I01100g	-3.04049	7589.06	1.25153e-14	GCY1	Uncharacterized ORF; Ortholog(s) have alditol:NADP+ 1-oxidoreductase activity, mRNA binding activity and role in D-xylose catabolic process, arabinose catabolic process, cellular response to drug, cellular response to oxidative stress
CAGL0H04873g	-2.9842	1219.17	9.08843e-36	STP3	Uncharacterized ORF; Ortholog(s) have sequence-specific DNA binding activity, role in filamentous growth and nucleus localization
CAGL0F04895g	-2.92321	5039.85	6.5692e-15	GPH1	Uncharacterized ORF; Ortholog(s) have glycogen phosphorylase activity, role in glycogen catabolic process and cell surface, cytoplasm, hyphal cell wall localization
CAGL0L07766g	-2.91834	92.9119	4.25947e-05	ADY2	Uncharacterized ORF; Ortholog(s) have acetate transmembrane transporter activity, ammonium transmembrane transporter activity and role in acetate transport, ammonium transport, nitrogen utilization, transmembrane transport
CAGL0M00154g	-2.88526	1472.61	7.55794e-23	CYN1	Verified ORF; Plasma membrane high affinity cystine specific transporter; present only in pathogenic yeasts; confers the ability to utilize cystine as a sulfur source
CAGL0L09108g	-2.86168	2710.53	2.36045e-07	PDH1	Uncharacterized ORF; Ortholog(s) have role in propionate metabolic process and mitochondrial outer membrane localization
CAGL0C03740g	-2.85071	593.546	8.58758e-15	N/A	Uncharacterized ORF
CAGL0G05522g	-2.7946	5.27846	0.0391389	N/A	Uncharacterized ORF
CAGL0I05060g	-2.78194	704.028	5.23728e-25	DOT6	Uncharacterized ORF; Ortholog(s) have sequence-specific DNA binding activity and role in chromatin silencing at rDNA, chromatin silencing at telomere, filamentous growth, regulation of transcription from RNA polymerase II promoter, unidimensional cell growth
CAGL0H01177g	-2.73392	468.515	2.83032e-10	DPP1	Uncharacterized ORF; Ortholog(s) have diacylglycerol diphosphate phosphatase activity, phosphatidate phosphatase activity and role in farnesol biosynthetic process, phospholipid metabolic process
CAGL0L08448g	-2.72732	841.49	1.28621e-19	NCE102	Uncharacterized ORF; Ortholog(s) have role in eisosome assembly, establishment of protein localization in plasma membrane, negative regulation of protein phosphorylation, protein secretion
CAGL0K04631g	-2.71963	538.365	1.99794e-14	YGR067C	Uncharacterized ORF has domain(s) with predicted nucleic acid binding, zinc ion binding activity
CAGL0G02849g	-2.71429	6210.12	6.4709e-10	UIP4	Uncharacterized ORF; Ortholog(s) have endoplasmic reticulum, mitochondrial outer membrane, nuclear envelope localization
CAGL0K07678g	-2.70973	284.864	2.52735e-06	N/A	Uncharacterized ORF
CAGL0E06424g	-2.68739	6854.98	1.58138e-11	MCR1	Uncharacterized ORF; Ortholog(s) have cytochrome-b5 reductase activity and role in cellular response to oxidative stress, ergosterol biosynthetic process
CAGL0L06666g	-2.68526	1260.93	3.64043e-14	YHB1	Verified ORF; Putative flavohemoglobin
CAGL0D04422g	-2.67871	2841.16	8.80211e-17	YPL279C	Uncharacterized ORF; Ortholog(s) have endoplasmic reticulum localization
CAGL0C02057g	-2.65696	124.042	1.72731e-06	N/A	Uncharacterized ORF
CAGL0K07205g	-2.65165	422.853	1.25021e-19	N/A	Uncharacterized ORF
CAGL0C01749g	-2.65143	457.393	2.18525e-13	YBR242W	Uncharacterized ORF; Ortholog(s) have 5'-deoxynucleotidase activity, GMP 5'-nucleotidase activity and role in deoxyribonucleoside monophosphate catabolic process
CAGL0K08668g	-2.63313	912.57	1.04512e-29	MET28	Uncharacterized ORF; bZIP domain-containing protein
CAGL0A01870g	-2.62194	2865.91	9.58519e-05	N/A	Uncharacterized ORF
CAGL0I05082g	-2.60462	3733.42	3.05991e-16	N/A	Uncharacterized ORF; Has domain(s) with predicted nucleic acid binding, nucleotide binding activity
CAGL0H02101g	-2.59601	10818.3	7.46407e-09	RTC3	Uncharacterized ORF; Ortholog(s) have role in RNA metabolic process and cytoplasm, nucleus localization
CAGL0J05060g	-2.57286	2380.39	1.01e-27	ZAP1	Uncharacterized ORF; Ortholog(s) have RNA polymerase II regulatory region sequence-specific DNA binding, sequence-specific DNA binding RNA polymerase II transcription factor activity, zinc ion binding activity
CAGL0D02530g	-2.53807	1278.93	8.36812e-11	EGT2	Uncharacterized ORF; Putative endoglucanase; glycoside hydrolase; predicted GPI-anchor
CAGL0H07469g	-2.53029	446.121	0.000211241	ICS2	Uncharacterized ORF; Putative adhesin-like protein
CAGL0L10142g	-2.5284	388.209	1.54781e-25	RSB1	Uncharacterized ORF; Putative sphingolipid flippase; gene is upregulated in azole-resistant strain
CAGL0F04719g	-2.52489	1721.35	6.35831e-11	GSY2	Uncharacterized ORF; Ortholog(s) have glycogen (starch) synthase activity, role in glycogen biosynthetic process and cytoplasm localization
CAGL0A02233g	-2.52262	377.753	9.51899e-17	HXT6	Uncharacterized ORF; Ortholog(s) have glucose transmembrane transporter activity and mitochondrion, plasma membrane, plasma membrane enriched fraction localization
CAGL0G08602g	-2.51986	997.067	5.36924e-21	RPI1	Uncharacterized ORF; Ortholog(s) have small GTPase regulator activity, role in Ras protein signal transduction and nucleus localization
CAGL0B01078g	-2.51973	968.259	1.39888e-14	YLR177W	Uncharacterized ORF; Putative protein; gene is upregulated in azole-resistant strain
CAGL0I00902g	-2.50915	376.413	1.05322e-18	GAT2	Uncharacterized ORF; Has domain(s) with predicted sequence-specific DNA binding, sequence-specific DNA binding transcription factor activity, zinc ion binding activity and role in regulation of transcription, DNA-dependent
CAGL0B04917g	-2.50835	1227.88	9.44569e-06	IDP2	Verified ORF; S-adenosylmethionine synthetase
CAGL0K07458g	-2.49664	2392.79	1.63638e-15	YPK1	Uncharacterized ORF; Ortholog(s) have protein serine/threonine kinase activity, role in eisosome assembly, negative regulation of phospholipid translocation, protein autophosphorylation and cellular bud neck, cytosol, plasma membrane localization
CAGL0K03421g	-2.48497	724.967	1.73262e-07	PGM2	Uncharacterized ORF; Ortholog(s) have phosphoglucomutase activity
CAGL0J00715g	-2.47771	73.1224	1.97295e-05	YHR022C	Uncharacterized ORF has domain(s) with predicted GTP binding, GTPase activity, role in GTP catabolic process, small GTPase mediated signal transduction and membrane localization
CAGL0H04939g	-2.46062	79.9323	0.00032468	FBP1	Uncharacterized ORF; Ortholog(s) have fructose 1,6-bisphosphate 1-phosphatase activity, role in gluconeogenesis, reactive oxygen species metabolic process and cytosol localization
CAGL0A01782g	-2.45254	3383.06	9.27385e-17	HXT4	Uncharacterized ORF; Ortholog(s) have glucose transmembrane transporter activity, pentose transmembrane transporter activity and membrane fraction localization
CAGL0K01771g	-2.44698	683.668	1.06862e-18	N/A	Uncharacterized ORF; Has domain(s) with predicted transferase activity, transferring acyl groups activity
CAGL0A02211g	-2.44225	1642.28	2.6118e-12	HXT7	Uncharacterized ORF; Ortholog(s) have glucose transmembrane transporter activity, pentose transmembrane transporter activity and mitochondrion, plasma membrane, plasma membrane enriched fraction localization
CAGL0K04367g	-2.42571	2334.15	1.06862e-18	MUP1	Uncharacterized ORF; Ortholog(s) have L-methionine secondary active transmembrane transporter activity and role in sulfur amino acid transport
CAGL0K07634g	-2.39416	203.234	1.41518e-06	GAT1	Uncharacterized ORF; Ortholog(s) have RNA polymerase II core promoter proximal region sequence-specific DNA binding transcription factor activity involved in positive regulation of transcription, <a href="#GOsection">more</a>
CAGL0E03674g	-2.37638	279.566	9.70722e-17	TPO1_2	Uncharacterized ORF; Has domain(s) with predicted integral to membrane localization
CAGL0F04917g	-2.37542	107.002	7.88389e-10	PIG1	Uncharacterized ORF; Putative regulatory subunit for protein phosphatase; gene is upregulated in azole-resistant strain
CAGL0F08217g	-2.36265	166.62	7.60693e-14	RIE1	Uncharacterized ORF; Ortholog(s) have cytoplasmic stress granule localization
CAGL0K10626g	-2.35453	1980.98	6.9584e-40	GSY1	Uncharacterized ORF; Ortholog(s) have glycogen (starch) synthase activity, role in glycogen biosynthetic process and mitochondrion localization
CAGL0F04521g	-2.3424	342.671	7.78109e-16	ECM13	Uncharacterized ORF; Ortholog(s) have role in fungal-type cell wall organization
CAGL0E05632g	-2.32448	226.738	2.04141e-08	PUT4	Uncharacterized ORF; Ortholog(s) have L-proline transmembrane transporter activity, role in gamma-aminobutyric acid transport, proline transport and Golgi apparatus, endoplasmic reticulum localization
CAGL0F07953g	-2.30754	90.6623	0.000258477	SPG1	Uncharacterized ORF; Ortholog(s) have mitochondrion localization
CAGL0L06072g	-2.29983	36.7124	1.72731e-06	N/A	Uncharacterized ORF; Has domain(s) with predicted nucleic acid binding, zinc ion binding activity and intracellular localization
CAGL0E05654g	-2.29874	3870.82	5.55234e-09	PGC1	Uncharacterized ORF; Ortholog(s) have phosphatidylglycerol phospholipase C activity, role in phosphatidylglycerol catabolic process and lipid particle, mitochondrion localization
CAGL0K02145g	-2.29792	13966.7	6.94693e-28	COM2	Uncharacterized ORF; Ortholog(s) have role in cellular response to sulfur dioxide, regulation of cellular response to stress
CAGL0J04884g	-2.29332	1838.88	1.13333e-06	UBX6	Uncharacterized ORF; Ortholog(s) have role in sporulation resulting in formation of a cellular spore, ubiquitin-dependent protein catabolic process and nucleus localization
CAGL0E05566g	-2.29286	5941.06	1.46441e-22	TYE7	Uncharacterized ORF; Ortholog(s) have sequence-specific DNA binding, sequence-specific DNA binding transcription factor activity
CAGL0L10362g	-2.2904	4249.66	7.46407e-09	YOR062C	Uncharacterized ORF; Ortholog of <i>S. cerevisiae</i> : YOR062C
CAGL0G01056g	-2.28923	112.895	0.000427725	GAS2	Uncharacterized ORF; Putative glycoside hydrolase of the Gas/Phr family; predicted GPI-anchor
CAGL0G02937g	-2.27804	135.11	6.38201e-12	PDC6	Uncharacterized ORF; Ortholog(s) have pyruvate decarboxylase activity and role in L-phenylalanine catabolic process, aromatic amino acid family catabolic process to alcohol via Ehrlich pathway, ethanol metabolic process, tryptophan catabolic process
CAGL0F07029g	-2.26759	2367.49	1.00792e-12	MET13	Uncharacterized ORF; Ortholog(s) have methylenetetrahydrofolate reductase (NADPH) activity, role in methionine biosynthetic process, oxidation-reduction process and cytosol, mitochondrion, nucleus localization
CAGL0K10868g	-2.25758	6009.42	6.85551e-10	CTA1	Verified ORF; Putative catalase A; gene is downregulated in azole-resistant strain; regulated by oxidative stress and glucose starvation; protein abundance increased in ace2 mutant cells
CAGL0E01881g	-2.25755	439.489	7.00235e-06	YPS11	Uncharacterized ORF; Putative aspartic protease; member of a YPS gene cluster that is required for virulence in mice; induced in response to low pH and high temperature
CAGL0M00374g	-2.25397	3922.1	3.32944e-15	MET5	Uncharacterized ORF; Ortholog(s) have sulfite reductase (NADPH) activity and role in fungal-type cell wall organization, oxidation-reduction process, sulfate assimilation, sulfur amino acid biosynthetic process
CAGL0G09273g	-2.24831	757.61	5.05105e-10	SNG1	Uncharacterized ORF; Putative transporter involved in nitrosoguanidine resistance; gene is downregulated in azole-resistant strain
CAGL0J01595g	-2.24272	6455.18	4.15479e-11	GLM6	Uncharacterized ORF; Gene used for molecular typing of <i>C. glabrata</i> strain isolates
CAGL0K08624g	-2.21913	1066.74	4.43315e-12	HAP4	Uncharacterized ORF; Ortholog(s) have RNA polymerase II activating transcription factor binding, <a href="#GOsection">more</a>
CAGL0B02838g	-2.21581	505.577	1.67714e-09	MUP1	Uncharacterized ORF; Has domain(s) with predicted role in amino acid transmembrane transport and membrane localization
CAGL0J04290g	-2.21536	144.565	1.14737e-06	FUS3	Uncharacterized ORF; Ortholog(s) have MAP kinase activity
CAGL0A00495g	-2.20975	6675.34	1.12071e-14	PMA1	Uncharacterized ORF; Putative plasma membrane proton pump with a predicted role in pH homeostasis
CAGL0C01397g	-2.19443	155.395	8.58578e-14	PFK26	Uncharacterized ORF; Ortholog(s) have 6-phosphofructo-2-kinase activity
CAGL0E05808g	-2.18408	1120.75	1.33196e-10	THI6	Verified ORF; Bifunctional enzyme of thiamine biosynthesis, with thiamine-phosphate pyrophosphorylase and 4-methyl-5-beta-hydroxyethylthiazole kinase activities; active as a homohexamer
CAGL0C04587g	-2.17753	1259.68	1.40789e-05	YJR098C	Uncharacterized ORF; Ortholog of <i>S. cerevisiae</i> : YJR098C
CAGL0H03971g	-2.16928	1637.2	1.76648e-08	YCP4	Uncharacterized ORF; Ortholog(s) have membrane raft, mitochondrion, plasma membrane enriched fraction localization
CAGL0G10219g	-2.16915	79.78	0.000540024	AWP12	Uncharacterized ORF; Adhesin-like protein with 5 tandem repeats; predicted GPI-anchor; similarity to S. cerevisiae flocculins, cell wall proteins that mediate adhesion
CAGL0B02981g	-2.16699	586.312	1.62073e-16	MNT3	Uncharacterized ORF
CAGL0I10054g	-2.15919	153.665	7.7247e-11	SKN1	Uncharacterized ORF; Ortholog(s) have glucosidase activity, role in (1->6)-beta-D-glucan biosynthetic process, fungal-type cell wall organization, sphingolipid biosynthetic process and integral to membrane localization
CAGL0M03377g	-2.14354	2607.76	1.94232e-08	GLC3	Uncharacterized ORF; Ortholog(s) have 1,4-alpha-glucan branching enzyme activity, role in glycogen biosynthetic process and cytoplasm localization
CAGL0F00605g	-2.1269	5712.22	3.87163e-10	EMI2	Verified ORF; Aldohexose specific glucokinase
CAGL0M01716g	-2.12654	60.1914	0.000296056	TEC1	Uncharacterized ORF; Ortholog(s) have RNA polymerase II core promoter proximal region sequence-specific DNA binding, <a href="#GOsection">more</a>
CAGL0I05148g	-2.1029	1906.1	1.12103e-10	DLD1	Uncharacterized ORF; D-lactate ferricytochrome C oxidoreductase
CAGL0H03993g	-2.0959	2231.62	9.03425e-17	CIT1	Uncharacterized ORF; Ortholog(s) have citrate (Si)-synthase activity, role in citrate metabolic process, tricarboxylic acid cycle and mitochondrion, soluble fraction localization
CAGL0I05610g	-2.08299	61.2434	1.75848e-06	YNR014W	Uncharacterized ORF; Ortholog of <i>S. cerevisiae</i> : YNR014W
CAGL0C02893g	-2.07841	2042.16	6.35087e-10	HRK1	Uncharacterized ORF; Ortholog(s) have protein serine/threonine kinase activity, role in cellular ion homeostasis, protein phosphorylation, regulation of nitrogen utilization and cell division site, cell tip, cytosol localization
CAGL0I10384g	-2.07631	6650.08	3.2425e-05	TPO2	Uncharacterized ORF; Ortholog(s) have spermine transmembrane transporter activity, role in cellular response to drug, spermine transport and fungal-type vacuole membrane, plasma membrane localization
CAGL0L06512g	-2.06953	169.237	8.83675e-05	BNS1	Uncharacterized ORF; Ortholog(s) have role in meiosis
CAGL0J07084g	-2.05924	2446.67	1.23685e-08	YPL113C	Uncharacterized ORF; Ortholog(s) have oxidoreductase activity, acting on the CH-OH group of donors, NAD or NADP as acceptor activity and role in metabolic process
CAGL0G01122g	-2.05591	382.461	1.78241e-10	CIS1	Uncharacterized ORF; Putative protein; gene is upregulated in azole-resistant strain
CAGL0K12254g	-2.01919	1311.52	0.000285468	VID24	Uncharacterized ORF; Ortholog(s) have role in negative regulation of gluconeogenesis, proteasomal ubiquitin-dependent protein catabolic process, protein targeting to vacuole, vacuolar protein catabolic process, vesicle fusion with vacuole
CAGL0M05995g	-2.0145	4810.81	3.95202e-11	PET10	Uncharacterized ORF; Ortholog(s) have lipid particle localization
CAGL0H05379g	-2.00323	1328.25	7.28435e-10	GCR1	Uncharacterized ORF; Ortholog(s) have RNA polymerase II core promoter proximal region sequence-specific DNA binding, <a href="#GOsection">more</a>
CAGL0J07568g	-2.00213	6650.75	8.1929e-09	LAP3	Uncharacterized ORF; Ortholog(s) have RNA polymerase II core promoter proximal region sequence-specific DNA binding, cysteine-type peptidase activity, double-stranded DNA binding, mRNA binding, single-stranded DNA binding activity
CAGL0E00231g	-2.00204	335.681	1.41799e-13	N/A	Uncharacterized ORF; Putative adhesin-like protein; contains tandem repeats and a predicted GPI-anchor
CAGL0E03740g	-1.99426	193.501	1.38403e-10	YHL026C	Uncharacterized ORF; Ortholog of <i>S. cerevisiae</i> : YHL026C
CAGL0G05698g	-1.99024	2256.5	4.01554e-11	GDH2	Uncharacterized ORF; Ortholog(s) have glutamate dehydrogenase (NAD+) activity, role in nitrogen compound metabolic process and cytosol, mitochondrion localization
CAGL0J11132g	-1.97873	5216.38	4.20198e-15	MDG1	Uncharacterized ORF; Ortholog(s) have role in pheromone-dependent signal transduction involved in conjugation with cellular fusion and membrane raft, plasma membrane localization
CAGL0K09702g	-1.97497	1663.77	4.50211e-13	N/A	Uncharacterized ORF; Putative stress-induced alcohol dehydrogenase; gene is upregulated in azole-resistant strain; protein differentially expressed in azole resistant strain
CAGL0A04829g	-1.97285	34296.3	6.27485e-08	HXK1	Uncharacterized ORF; Putative hexokinase isoenzyme 2; protein differentially expressed in azole resistant strain
CAGL0F08085g	-1.96435	1321.35	4.62804e-06	FMP43	Uncharacterized ORF; Ortholog(s) have pyruvate transmembrane transporter activity, role in mitochondrial pyruvate transport and mitochondrial membrane, plasma membrane localization
CAGL0I08305g	-1.95757	1004.13	1.38088e-06	YAT2	Uncharacterized ORF; Ortholog(s) have carnitine O-acetyltransferase activity
CAGL0L03982g	-1.95066	391.8	1.41518e-06	MLS1	Uncharacterized ORF; Ortholog(s) have peroxisome localization
CAGL0M03305g	-1.95043	10.3521	0.0421058	PMP2	Uncharacterized ORF; Ortholog(s) have role in cation transport and membrane localization
CAGL0J04268g	-1.93337	3975.75	1.90944e-07	ACH1	Uncharacterized ORF; Ortholog(s) have acetate CoA-transferase activity, acetyl-CoA hydrolase activity, role in acetate metabolic process, cellular response to alkalinity and cytosol, mitochondrion, soluble fraction localization
CAGL0C03223g	-1.93307	1212.33	1.17528e-07	SDH2	Uncharacterized ORF; Putative iron-sulfur protein subunit of succinate dehydrogenase; gene is downregulated in azole-resistant strain
CAGL0E04004g	-1.91679	501.139	1.11816e-14	MUP3	Uncharacterized ORF; Ortholog(s) have L-methionine transmembrane transporter activity and role in amino acid transport
CAGL0G02739g	-1.91291	42.2361	0.00370899	XBP1	Uncharacterized ORF; Ortholog(s) have sequence-specific DNA binding, sequence-specific DNA binding transcription factor activity, role in response to stress and nucleus localization
CAGL0F07601g	-1.90968	3505.7	3.74718e-13	CWP2	Verified ORF; Putative GPI-linked cell wall protein
CAGL0H10054g	-1.9073	360.847	4.22438e-10	YBR053C	Uncharacterized ORF; Ortholog of <i>S. cerevisiae</i> : YBR053C, <i>C. albicans SC5314</i> : orf19.2722/CGR1, <i>C. parapsilosis CDC317</i> : CPAR2_400280 and <i>Candida tenuis NRRL Y-1498</i> : CANTEDRAFT_113139
CAGL0I09834g	-1.90537	21.9164	0.00112512	SPS4	Uncharacterized ORF; Ortholog of <i>S. cerevisiae</i> : SPS4, <i>C. albicans SC5314</i> : orf19.7568, <i>C. parapsilosis CDC317</i> : CPAR2_200810, <i>Candida tenuis NRRL Y-1498</i> : CANTEDRAFT_112327 and <i>Debaryomyces hansenii CBS767</i> : DEHA2G06336g
CAGL0K07315g	-1.90319	3453.55	5.67554e-18	COA6	Uncharacterized ORF; Ortholog(s) Ortholog(s) have copper ion binding activity, role in cellular copper ion homeostasis, mitochondrial cytochrome c oxidase assembly and mitochondrial intermembrane space localization
CAGL0K12100g	-1.89031	1026.59	2.47099e-15	HEM13	Uncharacterized ORF; Putative coproporphyrinogen III oxidase; protein differentially expressed in azole resistant strain
CAGL0A01474g	-1.87526	452.758	6.76989e-09	SCW11	Uncharacterized ORF; Ortholog(s) have role in cytokinesis, completion of separation and cell surface, extracellular region, fungal-type cell wall localization
CAGL0F03839g	-1.87232	4625.91	0.000104497	YMR209C	Uncharacterized ORF; Ortholog of <i>S. cerevisiae</i> : YMR209C, <i>C. albicans SC5314</i> : orf19.4816, <i>C. parapsilosis CDC317</i> : CPAR2_301660, <i>Candida tenuis NRRL Y-1498</i> : CANTEDRAFT_116651 and <i>Debaryomyces hansenii CBS767</i> : DEHA2F11044g
CAGL0H10164g	-1.87116	1414.09	0.00175772	MUM2	Uncharacterized ORF; Ortholog(s) have role in premeiotic DNA replication and cytoplasm localization
CAGL0G05566g	-1.8684	1043.28	3.74765e-08	FMP45	Uncharacterized ORF; Ortholog(s) have role in ascospore formation, cellular response to drug, fungal-type cell wall organization and cell cortex, cellular bud membrane, membrane raft, mitochondrion, plasma membrane enriched fraction localization
CAGL0I09702g	-1.86209	532.08	1.03802e-12	MCH5	Uncharacterized ORF; Ortholog(s) have riboflavin transporter activity, role in riboflavin transport and plasma membrane localization
CAGL0B03014g	-1.85369	1947.39	2.34849e-10	MNT3	Has domain(s) with predicted glycosyltransferase activity and role in protein glycosylation
CAGL0B04851g	-1.83995	868.149	5.51077e-13	BUD3	Uncharacterized ORF; Ortholog(s) have role in cytokinesis and cellular bud neck localization
CAGL0G05764g	-1.83885	4298.69	4.10006e-10	N/A	Uncharacterized ORF; Has domain(s) with predicted GTP binding activity, role in small GTPase mediated signal transduction and intracellular localization
CAGL0L12012g	-1.83566	253.176	9.3107e-05	TMT1	Uncharacterized ORF; Ortholog(s) have trans-aconitate 3-methyltransferase activity and cytosol localization
CAGL0B02651g	-1.83499	92.3379	3.22903e-06	MET32	Uncharacterized ORF; Ortholog(s) have RNA polymerase II activating transcription factor binding and core promoter proximal region sequence-specific DNA binding, <a href="#GOsection">more</a>
CAGL0C01793g	-1.83214	358.86	5.17336e-05	OM14	Uncharacterized ORF; Ortholog(s) have integral to mitochondrial outer membrane localization
CAGL0M12551g	-1.82644	225.872	0.000243101	RGI2	Uncharacterized ORF; Ortholog(s) have role in energy reserve metabolic process and cytoplasm localization
CAGL0M13277g	-1.82551	29026.5	1.05284e-06	YNK1	Uncharacterized ORF; Ortholog(s) have ATP binding, nucleoside diphosphate kinase activity
CAGL0D06402g	-1.8249	1304.93	1.6708e-20	MET17	Verified ORF; O-acetyl homoserine sulfhydrylase (OAHSH), ortholog of S. cerevisiae MET17; required for utilization of inorganic sulfate as sulfur source; able to utilize cystine as a sulfur source while S. cerevisiae met15 mutants are unable to do so
CAGL0B01243g	-1.82157	25.236	0.00470562	MATALPHA1	Uncharacterized ORF; Alpha-domain mating-type protein alpha1p; expressed in all MTLalpha strains and not in MTLa strains
CAGL0L07920g	-1.81773	1338.9	3.99026e-05	PET18	Uncharacterized ORF; Ortholog(s) have cytosol localization
CAGL0I10450g	-1.80383	40.3093	0.0024026	PEX4	Uncharacterized ORF; Ortholog(s) have ubiquitin-protein ligase activity, role in protein autoubiquitination, protein import into peroxisome matrix, receptor recycling, protein monoubiquitination and peroxisome localization
CAGL0E06116g	-1.80349	1578.21	4.9734e-12	RGM1	Uncharacterized ORF; Ortholog(s) have sequence-specific DNA binding activity, role in positive regulation of transcription from RNA polymerase II promoter and nuclear chromatin localization
CAGL0L08481g	-1.79826	56.2498	0.000628082	N/A	Uncharacterized ORF
CAGL0B00242g	-1.7929	25.5835	0.00647833	HMLALPHA1	Uncharacterized ORF; Alpha-domain mating-type protein alpha1p
CAGL0K09372g	-1.79113	502.78	1.64067e-05	MIG2	Uncharacterized ORF; Ortholog(s) have RNA polymerase II core promoter proximal region sequence-specific DNA binding, <a href="#GOsection">more</a>
CAGL0G05357g	-1.78863	3309.94	0.000100005	N/A	Uncharacterized ORF
CAGL0I01122g	-1.78391	3074.19	1.13727e-05	GRE3	Uncharacterized ORF; Ortholog(s) have D-xylose:NADP reductase activity, glucose 1-dehydrogenase (NADP+) activity, mRNA binding activity
CAGL0M09779g	-1.77459	240.684	1.85418e-07	CTS1	Uncharacterized ORF; Putative endochitinase with a predicted role in cell separation
CAGL0I00418g	-1.76751	46973	1.1477e-06	OLE1	Uncharacterized ORF; Ortholog(s) have electron carrier activity, stearoyl-CoA 9-desaturase activity
CAGL0L06864g	-1.75144	1703.72	2.34424e-09	N/A	Uncharacterized ORF; Putative protein related to ECM3; gene is downregulated in azole-resistant strain
CAGL0E02915g	-1.74712	415.143	3.18893e-07	N/A	Uncharacterized ORF; Putative adhesin-like protein
CAGL0B02860g	-1.74365	2270.17	5.11837e-05	ATG33	Uncharacterized ORF; Ortholog(s) have role in mitochondrion degradation and mitochondrion localization
CAGL0E05610g	-1.73853	3611.29	5.72265e-06	PYK2	Uncharacterized ORF; Ortholog(s) have pyruvate kinase activity, role in negative regulation of G0 to G1 transition, pyruvate metabolic process and cytosol, mitochondrion localization
CAGL0L08008g	-1.73837	2483.41	8.56536e-13	PMP1	Uncharacterized ORF; Ortholog(s) have enzyme regulator activity, role in cation transport and plasma membrane localization
CAGL0F02607g	-1.73398	160.623	0.00877339	DIT2	Uncharacterized ORF; Ortholog(s) have oxidoreductase activity, oxygen binding activity and role in ascospore wall assembly, chlamydospore formation
CAGL0K07381g	-1.72903	14.9559	0.0138418	N/A	Uncharacterized ORF
CAGL0K11880g	-1.71736	1415.85	3.47661e-07	MRH1	Uncharacterized ORF; Ortholog(s) have mitochondrion, plasma membrane, plasma membrane enriched fraction localization
CAGL0C01771g	-1.71366	876.962	9.3981e-05	VVS1	Uncharacterized ORF; Ortholog(s) have fungal-type vacuole membrane localization
CAGL0A02299g	-1.71298	4526.88	1.05387e-11	N/A	Uncharacterized ORF
CAGL0L09383g	-1.71229	466.545	2.23578e-05	SUT2	Uncharacterized ORF; Ortholog(s) have sequence-specific DNA binding activity, role in positive regulation of sterol import by positive regulation of transcription from RNA polymerase II promoter and nucleus localization
CAGL0B04367g	-1.71182	1326.66	2.73484e-07	SCO1	Uncharacterized ORF; Ortholog(s) have copper ion binding activity, role in copper ion transport, protein complex assembly and mitochondrial inner membrane, plasma membrane localization
CAGL0M03465g	-1.68475	39.1747	0.0177408	ATO2	Uncharacterized ORF; Ortholog(s) have ammonium transmembrane transporter activity, role in ammonium transport, nitrogen utilization and mitochondrion, plasma membrane localization
CAGL0A03212g	-1.68275	407.004	3.25668e-06	ATO3	Uncharacterized ORF; Ortholog(s) have ammonium transmembrane transporter activity, role in ammonium transport, nitrogen utilization, transmembrane transport and mitochondrion, plasma membrane localization
CAGL0E06380g	-1.68058	1350.79	3.11115e-05	NNR2	Uncharacterized ORF; Ortholog(s) have ATP-dependent NAD(P)H-hydrate dehydratase activity, role in nicotinamide nucleotide metabolic process and cytosol localization
CAGL0L11990g	-1.67703	293.959	1.61574e-07	GRX4	Uncharacterized ORF; Ortholog(s) have disulfide oxidoreductase activity, role in actin cytoskeleton organization, cellular iron ion homeostasis, cellular response to oxidative stress and nucleus localization
CAGL0J08316g	-1.67039	1079.84	1.26734e-07	MET2	Uncharacterized ORF; Ortholog(s) have homoserine O-acetyltransferase activity, role in methionine biosynthetic process and cytosol localization
CAGL0G02717g	-1.66875	173.052	0.000234248	SGA1	Uncharacterized ORF; Ortholog(s) have glucan 1,4-alpha-glucosidase activity, role in glycogen catabolic process and Golgi apparatus, endoplasmic reticulum, fungal-type vacuole, prospore membrane localization
CAGL0L01551g	-1.66825	570.123	3.68019e-07	SUR7	Uncharacterized ORF; Ortholog(s) have role in ascospore formation, cellular response to biotic stimulus, cellular response to chemical stimulus, cellular response to glucose starvation and cellular response to neutral pH, <a href="#GOsection">more</a>
CAGL0F03707g	-1.66615	1235.94	5.02354e-10	N/A	Uncharacterized ORF; Has domain(s) with predicted ATP binding, protein serine/threonine kinase activity and role in protein phosphorylation
CAGL0K05973g	-1.64943	9408.97	9.24077e-05	HSP60	Verified ORF; Heat shock protein 60, mitochondrial precursor; putative chaperonin
CAGL0F08371g	-1.64268	3502.31	0.00821745	TNA1	Verified ORF; High-affinity nicotinic acid transporter; strongly induced under niacin-limiting conditions
CAGL0I01276g	-1.64156	332.215	2.61653e-07	YHR112C	Uncharacterized ORF; Ortholog(s) have cytoplasm, nucleus localization
CAGL0D04070g	-1.62618	1272.1	2.69322e-12	DPC29	Uncharacterized ORF; Ortholog(s) have mitochondrion localization
CAGL0J05390g	-1.6161	41.3636	0.00580077	N/A	Uncharacterized ORF
CAGL0G03773g	-1.61583	1957.71	7.46407e-09	POM33	Uncharacterized ORF; Ortholog(s) have structural constituent of nuclear pore activity
CAGL0L03696g	-1.61567	173.456	1.70584e-06	ECM3	Uncharacterized ORF; Ortholog(s) have role in fungal-type cell wall organization and endoplasmic reticulum localization
CAGL0A01716g	-1.61522	1485.59	2.07709e-06	PNC1	Uncharacterized ORF; Ortholog(s) have nicotinamidase activity, role in chromatin silencing at rDNA, chromatin silencing at telomere, replicative cell aging and cytosol, nucleus, peroxisome localization
CAGL0F02167g	-1.61454	223.863	1.21841e-05	MSH4	Uncharacterized ORF; Ortholog(s) have DNA binding activity, role in reciprocal meiotic recombination and nuclear chromosome localization
CAGL0I10494g	-1.6016	401.087	6.74477e-08	FHN1	Uncharacterized ORF; Ortholog(s) have role in establishment of protein localization in plasma membrane and Golgi apparatus, RNA polymerase transcription factor SL1 complex, membrane raft localization
CAGL0K06105g	-1.59968	151.076	0.00200828	BOP2	Uncharacterized ORF; Ortholog of <i>S. cerevisiae</i> : BOP2
CAGL0I04796g	-1.59195	982.508	2.95023e-06	SCO2	Uncharacterized ORF; Ortholog(s) have mitochondrial envelope localization
CAGL0C00275g	-1.59127	40805.5	0.000149885	HSP31	Verified ORF; Putative cysteine protease; protein differentially expressed in azole resistant strain; gene is upregulated in azole-resistant strain
CAGL0H08888g	-1.5897	630.665	1.08292e-07	FLC3	Uncharacterized ORF; Ortholog(s) have role in heme transport and cytoplasmic vesicle, endoplasmic reticulum, mitochondrion localization
CAGL0C02827g	-1.58951	352.891	0.000237156	DSE3	Uncharacterized ORF; Ortholog(s) have cellular bud neck localization
CAGL0D04158g	-1.58828	2989.55	1.68043e-06	RSM25	Uncharacterized ORF; Ortholog(s) have structural constituent of ribosome activity and mitochondrial small ribosomal subunit localization
CAGL0C03916g	-1.58532	148.012	2.10439e-08	N/A	Uncharacterized ORF; Has domain(s) with predicted role in protein glycosylation
CAGL0G03047g	-1.58093	778.694	0.000508691	DBF2	Uncharacterized ORF; Ortholog(s) have protein serine/threonine kinase activity
CAGL0M13541g	-1.58055	1312.18	1.99853e-08	TDA1	Uncharacterized ORF; Ortholog(s) have protein kinase activity, role in protein phosphorylation and cytoplasm, nucleus localization
CAGL0D00198g	-1.57889	1234.17	8.03191e-06	BDH1	Uncharacterized ORF; Ortholog(s) have (R,R)-butanediol dehydrogenase activity, role in butanediol biosynthetic process and cytoplasm localization
CAGL0I02530g	-1.56953	557.428	9.3981e-05	FMO1	Uncharacterized ORF; Ortholog(s) have N,N-dimethylaniline monooxygenase activity, role in protein folding and endoplasmic reticulum membrane, mitochondrion localization
CAGL0L06006g	-1.561	3060.1	0.000368399	ATG1	Uncharacterized ORF; Ortholog(s) have protein serine/threonine kinase activity
CAGL0M09020g	-1.56035	290.632	0.0107381	SFC1	Uncharacterized ORF; Ortholog(s) have succinate:fumarate antiporter activity, role in fumarate transport, succinate transport and mitochondrion, plasma membrane localization
CAGL0F03663g	-1.55654	924.782	5.07707e-12	MRPL40	Uncharacterized ORF; Ortholog(s) have structural constituent of ribosome activity and mitochondrial large ribosomal subunit localization
CAGL0B02431g	-1.5542	1806.11	1.97757e-07	NDI1	Uncharacterized ORF; Ortholog(s) have NADH dehydrogenase (ubiquinone) activity and role in NADH oxidation, chronological cell aging, mitochondrial electron transport, NADH to ubiquinone, positive regulation of apoptotic process
CAGL0G05544g	-1.55337	3303.04	0.00149853	HBT1	Uncharacterized ORF; Ortholog(s) have role in cell morphogenesis involved in conjugation with cellular fusion and cell surface, fungal-type cell wall, mating projection, plasma membrane enriched fraction localization
CAGL0K07568g	-1.55168	90.3432	0.0122835	PMU3	Verified ORF; Protein with a phosphomutase-like domain
CAGL0L06160g	-1.54564	2658.35	5.45681e-10	COX4	Uncharacterized ORF; Ortholog(s) have cytochrome-c oxidase activity, zinc ion binding activity, role in aerobic respiration, mitochondrial electron transport, cytochrome c to oxygen and mitochondrial respiratory chain complex IV, plasma membrane localization
CAGL0D04026g	-1.54329	353.661	0.00184356	UGA1	Uncharacterized ORF; Ortholog(s) have 4-aminobutyrate transaminase activity, pyridoxal phosphate binding activity, role in gamma-aminobutyric acid catabolic process, glutamate metabolic process and cytosol localization
CAGL0D06512g	-1.54203	376.56	5.27313e-07	N/A	Uncharacterized ORF; Putative membrane bound guanine nucleotide exchange factor; gene is upregulated in azole-resistant strain
CAGL0E01529g	-1.54152	502.768	0.0011492	PFK27	Uncharacterized ORF; Ortholog(s) have role in fructose 2,6-bisphosphate metabolic process, regulation of glycolysis
CAGL0D00946g	-1.53563	1361.6	2.50909e-08	N/A	Uncharacterized ORF; Putative phosphatidylinositol transfer protein; gene is upregulated in azole-resistant strain
CAGL0A03146g	-1.52984	1530.89	9.06221e-11	COI1	Uncharacterized ORF; Ortholog(s) Ortholog(s) have role in mitochondrial cytochrome c oxidase assembly, mitochondrial respirasome assembly, mitochondrial respiratory chain complex III assembly and integral component of mitochondrial inner membrane localization
CAGL0M12474g	-1.52495	414.523	1.12515e-05	YIL055C	Uncharacterized ORF; Ortholog of <i>S. cerevisiae</i> : YIL055C
CAGL0F07997g	-1.52452	795.79	1.06281e-13	KEL2	Uncharacterized ORF; Ortholog(s) have role in conjugation with cellular fusion, negative regulation of exit from mitosis and cellular bud neck, cellular bud tip, mating projection tip localization
CAGL0G02277g	-1.52231	6363.53	0.000148838	MRPL20	Uncharacterized ORF; Ortholog(s) have structural constituent of ribosome activity and mitochondrial large ribosomal subunit localization
CAGL0C05071g	-1.52091	1888.27	3.85189e-06	THI20	Uncharacterized ORF; Ortholog(s) have hydroxymethylpyrimidine kinase activity, phosphomethylpyrimidine kinase activity, thiaminase activity, role in thiamine biosynthetic process, thiamine catabolic process and cytosol localization
CAGL0G00308g	-1.52066	869.265	4.7887e-07	SCW4	Verified ORF; Putative transglycosidase with a predicted role in the modification of 1,3-beta-glucan
CAGL0I07865g	-1.51932	120.593	0.00499367	PHM7	Uncharacterized ORF; Ortholog(s) have Golgi apparatus, fungal-type vacuole, plasma membrane localization
CAGL0E01837g	-1.51797	1333.1	0.00144725	YPS9	Uncharacterized ORF; Putative aspartic protease; predicted GPI-anchor; member of a YPS gene cluster that is required for virulence in mice; expression induced at high temperature
CAGL0D00286g	-1.51797	4998.66	0.000112912	BMT1	Uncharacterized ORF; Beta mannosyltransferase
CAGL0J09680g	-1.51642	188.205	6.27485e-08	HEM3	Uncharacterized ORF; Ortholog(s) have hydroxymethylbilane synthase activity, role in heme biosynthetic process, pathogenesis and cytoplasm, nucleus localization
CAGL0L00957g	-1.51338	1800.63	9.02362e-07	N/A	Uncharacterized ORF; Has domain(s) with predicted heat shock protein binding, unfolded protein binding activity and role in protein folding
CAGL0L01925g	-1.51113	3292.96	6.96244e-10	UGP1	Uncharacterized ORF; Putative UDP-glucose pyrophosphorylase; increased protein abundance in azole resistant strain
CAGL0K10736g	-1.51035	898	0.00137683	CYB2	Verified ORF; Ortholog(s) have L-lactate dehydrogenase (cytochrome) activity and mitochondrial intermembrane space localization
CAGL0F05071g	-1.50995	1017.29	0.000120462	ECI1	Uncharacterized ORF; Ortholog(s) have dodecenoyl-CoA delta-isomerase activity, role in fatty acid beta-oxidation, filamentous growth and peroxisome localization
CAGL0D00143g	-1.50663	80.6397	3.28273e-06	N/A	Putative adhesin-like protein; predicted GPI anchor
CAGL0G07315g	-1.50515	1938.84	2.39161e-11	AIM31	Uncharacterized ORF; Ortholog(s) have role in mitochondrial respiratory chain complex IV assembly, mitochondrial respiratory chain supercomplex assembly
CAGL0G02563g	-1.50492	133.358	0.018117	N/A	Uncharacterized ORF; Has domain(s) with predicted ubiquitin thiolesterase activity and role in ubiquitin-dependent protein catabolic process
CAGL0A01650g	-1.50436	1083.51	2.99872e-09	N/A	Uncharacterized ORF; Putative protein; gene is upregulated in azole-resistant strain
CAGL0L10824g	-1.50184	2669.09	7.94829e-08	IMG1	Uncharacterized ORF; Ortholog(s) have structural constituent of ribosome activity and mitochondrial large ribosomal subunit localization
CAGL0H05995g	-1.49852	43.3555	0.00190498	AIM2	Uncharacterized ORF; Ortholog(s) have cytosol, nucleus localization
CAGL0I10516g	-1.49673	8563.12	1.11961e-09	YGR130C	Uncharacterized ORF; Ortholog(s) have eisosome, membrane raft localization
CAGL0H07491g	-1.49641	486.054	2.50058e-09	AMN1	Uncharacterized ORF; Ortholog(s) have role in mitotic cell cycle checkpoint, negative regulation of exit from mitosis and cellular bud, cytoplasm, nucleus localization
CAGL0E02255g	-1.49583	7091.65	1.7293e-06	ZEO1	Uncharacterized ORF; Ortholog(s) have role in fungal-type cell wall organization, response to stress and extrinsic to plasma membrane, mitochondrial outer membrane, plasma membrane enriched fraction localization
CAGL0F07117g	-1.49582	4770.7	0.000916506	GPG1	Uncharacterized ORF; Putative subunit of the heterotrimeric G protein; gene is upregulated in azole-resistant strain
CAGL0L09273g	-1.49418	245.199	4.60268e-05	ICL2	Uncharacterized ORF; Ortholog(s) have methylisocitrate lyase activity, role in propionate metabolic process and mitochondrial matrix localization
CAGL0B02970g	-1.48829	1244.13	1.11714e-08	BMT5	Uncharacterized ORF; Beta mannosyltransferase
CAGL0B01012g	-1.48631	60.4831	0.00161867	AGP1	Uncharacterized ORF; Ortholog(s) have L-proline transmembrane transporter activity and role in amino acid transport, transmembrane transport
CAGL0G09581g	-1.48264	2465.62	2.17815e-07	TUF1	Uncharacterized ORF; Ortholog(s) have GTPase activity, translation elongation factor activity, role in mitochondrial genome maintenance, mitochondrial translation, translational elongation and mitochondrion localization
CAGL0K04961g	-1.4826	3161.9	0.000100265	YPD1	Uncharacterized ORF; Ortholog(s) have protein histidine kinase binding, transferase activity, transferring phosphorus-containing groups activity, role in osmosensory signaling pathway via two-component system and cytoplasm, nucleus localization
CAGL0B03817g	-1.46184	1222.36	2.70053e-05	MHO1	Uncharacterized ORF; Ortholog(s) have cytosol, nucleus localization
CAGL0A04697g	-1.46006	1028.61	6.55256e-05	YMR31	Uncharacterized ORF; Ortholog(s) have oxoglutarate dehydrogenase (succinyl-transferring) activity, structural constituent of ribosome activity and role in 2-oxoglutarate metabolic process, tricarboxylic acid cycle
CAGL0M08448g	-1.44605	1205.73	1.57893e-09	MCD4	Uncharacterized ORF; Ortholog(s) have mannose-ethanolamine phosphotransferase activity and role in ATP transport, GPI anchor biosynthetic process, fungal-type cell wall organization
CAGL0H06699g	-1.4431	1062.53	6.56023e-09	GUT2	Uncharacterized ORF; Ortholog(s) have glycerol-3-phosphate dehydrogenase activity, role in NADH oxidation, glycerol metabolic process, replicative cell aging and integral to mitochondrial outer membrane, plasma membrane localization
CAGL0I02134g	-1.43884	276.444	0.00772548	PEX18	Uncharacterized ORF; Ortholog(s) have role in protein import into peroxisome matrix and cytosol, peroxisome localization
CAGL0L01089g	-1.43828	5301.72	2.2471e-05	GLT1	Uncharacterized ORF; Ortholog(s) have glutamate synthase (NADH) activity and cytosol, mitochondrion localization
CAGL0I01980g	-1.43406	1467.47	7.82831e-05	YSP1	Uncharacterized ORF; Putative activator of transcription; gene is upregulated in azole-resistant strain
CAGL0D00264g	-1.43053	54.55	0.0158139	NUD1	Uncharacterized ORF; Putative nuclear phosphatase regulatory subunit; gene is downregulated in azole-resistant strain
CAGL0K08844g	-1.42725	1561.01	2.34424e-09	AIM17	Uncharacterized ORF; Ortholog(s) have gamma-butyrobetaine dioxygenase activity, role in carnitine biosynthetic process and mitochondrion localization
CAGL0M12364g	-1.4266	17.8853	0.0201465	N/A	Uncharacterized ORF
CAGL0G09262g	-1.42501	261.183	4.21373e-08	COA2 / YPL189C-A	Cytochrome oxidase assembly factor
CAGL0I02552g	-1.42495	1007.3	8.94734e-07	STB5	Uncharacterized ORF; Ortholog(s) have sequence-specific DNA binding, sequence-specific DNA binding transcription factor activity
CAGL0A01628g	-1.41704	921.038	0.0104286	MIG1	Verified ORF; Transcriptional regulatory protein
CAGL0J04840g	-1.41505	888.144	1.19785e-05	AIM22	Uncharacterized ORF; Ortholog(s) have role in protein lipoylation and mitochondrion localization
CAGL0B01265g	-1.41408	93.0517	0.00270139	MATALPHA2	Uncharacterized ORF; Mating-type regulatory protein alpha2; expressed in all MTLalpha strains and not in MTLa strains
CAGL0G09977g	-1.41291	2353.22	0.00734658	GDB1	Uncharacterized ORF; Ortholog(s) have 4-alpha-glucanotransferase activity, amylo-alpha-1,6-glucosidase activity, role in glycogen catabolic process and mitochondrion localization
CAGL0L02453g	-1.4129	1138.64	0.000210125	MIT1	Uncharacterized ORF
CAGL0M09086g	-1.41215	3959.74	7.81448e-11	BUD4	Uncharacterized ORF; Ortholog(s) have cell adhesion molecule binding activity and role in axial cellular bud site selection, cell-substrate adhesion, filamentous growth of a population of unicellular organisms, growth of symbiont in host, pathogenesis
CAGL0K11616g	-1.40887	610.493	1.48847e-09	OAC1	Uncharacterized ORF; Putative mitochondrial inner membrane transporter; gene is upregulated in azole-resistant strain
CAGL0F06919g	-1.40712	1360.97	1.32887e-06	IRC24	Uncharacterized ORF; Ortholog(s) have cytoplasm localization
CAGL0D02310g	-1.39996	3225.36	0.00189577	MSC6	Uncharacterized ORF; Ortholog(s) have role in reciprocal meiotic recombination and mitochondrion localization
CAGL0K07293g	-1.39813	1879.1	3.47861e-05	FAA4	Uncharacterized ORF; Ortholog(s) have long-chain fatty acid-CoA ligase activity, role in long-chain fatty acid transport, long-chain fatty-acyl-CoA metabolic process and lipid particle localization
CAGL0H05775g	-1.39667	1748.37	4.2468e-08	MSY1	Uncharacterized ORF; Ortholog(s) have tyrosine-tRNA ligase activity, role in mitochondrial tyrosyl-tRNA aminoacylation and mitochondrion localization
CAGL0K02277g	-1.39492	327.508	1.75707e-06	DSE1	Uncharacterized ORF; Ortholog(s) have role in cell adhesion involved in single-species biofilm formation, cell wall organization, cellular response to glucose starvation, cytokinesis and completion of separation, <a href="#GOsection">more</a>
CAGL0G01738g	-1.38689	618.78	0.0435777	N/A	Uncharacterized ORF
CAGL0M01870g	-1.38454	115.833	4.25947e-05	N/A	Uncharacterized ORF; Putative zinc finger protein; gene is upregulated in azole-resistant strain
CAGL0F04125g	-1.3778	1749.97	1.06695e-05	YBL029W	Uncharacterized ORF; Ortholog of <i>S. cerevisiae</i> : YBL029W
CAGL0G03883g	-1.37699	6382.22	9.00577e-05	HSP104	Verified ORF; Ortholog(s) have ADP binding, ATP binding, ATPase activity, coupled, chaperone binding, unfolded protein binding activity
CAGL0K04235g	-1.37693	4228.03	0.000159517	NQM1	Uncharacterized ORF; Putative transaldolase
CAGL0H01353g	-1.37565	709.97	2.49165e-06	MHR1	Uncharacterized ORF; Ortholog(s) have recombinase activity, single-stranded DNA binding activity
CAGL0B02882g	-1.37552	345.293	0.000369854	BMT2	Uncharacterized ORF; Beta mannosyltransferase; transmembrane domain protein similar to C. albicans WRY family; gene is downregulated in azole-resistant strain
CAGL0J02926g	-1.37132	559.944	1.51357e-10	PET117	Uncharacterized ORF; Cytochrome c oxidase assembly factor; mutants are respiratory-deficient
CAGL0D00462g	-1.36386	1018.81	2.25161e-06	ASH1	Uncharacterized ORF; Ortholog(s) have RNA polymerase II core promoter proximal region sequence-specific DNA binding transcription factor activity involved in negative regulation of transcription, <a href="#GOsection">more</a>
CAGL0D02134g	-1.36247	265.46	0.00187301	RCI50	Uncharacterized ORF; Ortholog of <i>S. cerevisiae</i> : YKL133C
CAGL0M13189g	-1.3612	449.169	0.000555838	MSN4	Verified ORF; Putative transcription factor similar to S. cerevisiae Msn4p; involved in response to oxidative stress
CAGL0G06182g	-1.35761	791.613	5.98537e-05	YHR131C	Uncharacterized ORF; Ortholog of <i>S. cerevisiae</i> : YHR131C
CAGL0K04873g	-1.35474	508.256	5.32625e-06	N/A	Uncharacterized ORF
CAGL0K07007g	-1.35374	427.986	0.000376411	YBR238C	Uncharacterized ORF; Ortholog(s) have role in aerobic respiration, filamentous growth of a population of unicellular organisms in response to neutral pH, single-species biofilm formation on inanimate substrate
CAGL0A04675g	-1.35202	1146.49	0.00204532	ATG8	Uncharacterized ORF; Ortholog(s) have role in CVT pathway, ER to Golgi vesicle-mediated transport, autophagic vacuole assembly, cellular membrane fusion and cellular response to nitrogen starvation, <a href="#GOsection">more</a>
CAGL0L05742g	-1.34584	124.311	4.50653e-05	MRS3	Uncharacterized ORF; Ortholog(s) have iron ion transmembrane transporter activity, role in RNA splicing, mitochondrial iron ion transport and mitochondrion localization
CAGL0D00418g	-1.34522	343.691	0.000560966	FAT3	Uncharacterized ORF; Ortholog(s) have role in long-chain fatty acid transport
CAGL0M08514g	-1.34515	924.954	2.93441e-11	PIR3	Uncharacterized ORF; Pir protein family member, predicted GPI-anchor
CAGL0D04972g	-1.34385	1425.82	4.12193e-05	TAZ1	Uncharacterized ORF; Ortholog(s) have 1-acylglycerophosphocholine O-acyltransferase activity
CAGL0M13013g	-1.34025	113.264	0.000430544	OAR1	Uncharacterized ORF; Ortholog(s) have 3-oxoacyl-[acyl-carrier-protein] reductase (NADPH) activity, role in aerobic respiration, fatty acid metabolic process and mitochondrion localization
CAGL0K10120g	-1.34009	2727.77	3.25031e-11	PET100	Uncharacterized ORF; Ortholog(s) have unfolded protein binding activity, role in aerobic respiration, mitochondrial respiratory chain complex IV assembly and integral to mitochondrial inner membrane, plasma membrane localization
CAGL0K11968g	-1.33903	4469.42	0.000448157	EHD3	Uncharacterized ORF; Ortholog(s) have 3-hydroxyisobutyryl-CoA hydrolase activity and mitochondrion localization
CAGL0I01496g	-1.33891	2625.98	0.00065408	SSC1	Uncharacterized ORF; Ortholog(s) have ATPase activity, enzyme regulator activity and role in positive regulation of endodeoxyribonuclease activity, protein import into mitochondrial matrix, protein refolding, protein unfolding
CAGL0F02717g	-1.33649	404.974	2.86211e-06	PDH1	Verified ORF; Multidrug transporter, predicted plasma membrane ATP-binding cassette (ABC) transporter; regulated by Pdr1p; involved in fluconazole resistance
CAGL0F08041g	-1.33566	3159.42	0.000202402	PFK1	Uncharacterized ORF; Putative phosphofructokinase, alpha subunit; increased protein abundance in azole resistant strain
CAGL0J03850g	-1.33494	1092.27	0.000197519	MGE1	Uncharacterized ORF; Ortholog(s) have adenyl-nucleotide exchange factor activity, role in protein import into mitochondrial matrix, protein refolding and mitochondrial matrix, presequence translocase-associated import motor localization
CAGL0M02519g	-1.33487	267.524	5.26585e-07	FRK1	Uncharacterized ORF; Ortholog(s) have protein kinase activity, role in protein phosphorylation and cytoplasm localization
CAGL0M07832g	-1.33446	772.818	0.0107397	REC107	Uncharacterized ORF; Ortholog(s) have role in reciprocal meiotic recombination and condensed nuclear chromosome localization
CAGL0E01331g	-1.33365	937.439	1.21293e-07	SWI5	Uncharacterized ORF; Transcription factor; mutants display increased fungal burdens in mouse lungs and brain
CAGL0G04631g	-1.33295	385.279	0.000457558	IZH1	Uncharacterized ORF; Ortholog(s) have role in cellular zinc ion homeostasis and endoplasmic reticulum localization
CAGL0L00803g	-1.32903	809.861	3.11115e-05	PIG2	Uncharacterized ORF; Ortholog(s) have role in regulation of glycogen biosynthetic process and cytoplasm localization
CAGL0G07931g	-1.32401	788.188	9.11946e-07	MRPS12	Uncharacterized ORF; Ortholog(s) have mitochondrion, ribosome localization
CAGL0D00726g	-1.32159	910.202	0.000183526	CBS1	Uncharacterized ORF; Ortholog(s) have translation regulator activity and role in mitochondrial respiratory chain complex III biogenesis, positive regulation of mitochondrial translation
CAGL0K12056g	-1.31971	2903.62	5.9849e-05	RSM10	Uncharacterized ORF; Ortholog(s) have structural constituent of ribosome activity and mitochondrial small ribosomal subunit localization
CAGL0F08173g	-1.31791	111.21	1.08402e-05	CPD1	Uncharacterized ORF; Ortholog(s) have 2',3'-cyclic-nucleotide 3'-phosphodiesterase activity, role in cyclic nucleotide metabolic process and clathrin-coated vesicle localization
CAGL0G02695g	-1.31757	2586.21	1.11714e-08	FMC1	Uncharacterized ORF; Ortholog(s) have role in mitochondrial proton-transporting ATP synthase complex assembly and mitochondrial matrix localization
CAGL0C04807g	-1.31684	1427.79	2.59113e-06	RSM7	Uncharacterized ORF; Ortholog(s) have structural constituent of ribosome activity and mitochondrial small ribosomal subunit localization
CAGL0H06017g	-1.31051	223.109	0.000588165	FLR1	Verified ORF; Multidrug transporter of the major facilitator superfamily; gene is downregulated in azole-resistant strain
CAGL0H02387g	-1.30006	2913.8	3.20729e-06	TPS3	Uncharacterized ORF; Putative trehalose-6-phosphate synthase/phosphatase subunit; gene is upregulated in azole-resistant strain
CAGL0L02607g	-1.29953	637.115	0.000868279	N/A	Uncharacterized ORF has domain(s) with predicted hydrolase activity and role in nucleotide catabolic process
CAGL0G04785g	-1.29947	219.696	0.0119967	N/A	Uncharacterized ORF
CAGL0I04246g	-1.29868	1186.67	0.00103351	SUT1	Uncharacterized ORF; Putative transcription factor involved in sterol uptake; gene is upregulated in azole-resistant strain
CAGL0I05874g	-1.2978	2662.17	0.000797022	N/A	Verified ORF; Haloacid dehalogenase-like hydrolase
CAGL0M08552g	-1.29667	1989.19	1.97757e-07	PMP3	Uncharacterized ORF; Ortholog(s) have role in cation transport, regulation of membrane potential and plasma membrane localization
CAGL0M02783g	-1.29624	1227.86	2.91703e-09	HHO1	Uncharacterized ORF; Ortholog(s) have DNA binding activity, role in negative regulation of DNA recombination, negative regulation of chromatin silencing and nuclear nucleosome localization
CAGL0D02024g	-1.29582	1008.73	0.000731056	MRPL31	Uncharacterized ORF; Ortholog(s) have structural constituent of ribosome activity and mitochondrial large ribosomal subunit localization
CAGL0F09207g	-1.29544	5639.54	1.41627e-08	BAT1	Uncharacterized ORF; Ortholog(s) have branched-chain-amino-acid transaminase activity, role in branched chain family amino acid biosynthetic process, branched chain family amino acid catabolic process and mitochondrial matrix localization
CAGL0K09350g	-1.29499	953.744	2.3213e-06	SIP2	Uncharacterized ORF; Ortholog(s) have AMP-activated protein kinase activity
CAGL0H10362g	-1.29248	4347.97	8.83675e-05	TMA17	Uncharacterized ORF; Ortholog(s) have cytoplasm, nucleus, ribosome localization
CAGL0K05687g	-1.29161	1019.48	0.00183528	N/A	Uncharacterized ORF; Ortholog(s) have cytosol, nucleus localization
CAGL0M12969g	-1.29079	584.911	7.35168e-05	RCI37	Uncharacterized ORF; Ortholog of <i>S. cerevisiae</i> : YIL077C
CAGL0B05061g	-1.28741	113.099	0.0080814	AWP9	Putative adhesin-like protein; encoded in megasatellite cluster; involved in yeast-to-yeast adhesion; GPI-anchored
CAGL0K05813g	-1.28564	9270.01	0.000427557	GRX2	Uncharacterized ORF; Ortholog(s) have disulfide oxidoreductase activity, glutathione peroxidase activity, glutathione transferase activity, role in cellular response to oxidative stress, pathogenesis and cytosol, mitochondrion localization
CAGL0L04334g	-1.28448	1893.31	0.000245804	PET123	Uncharacterized ORF; Ortholog(s) have structural constituent of ribosome activity and mitochondrial small ribosomal subunit localization
CAGL0H03531g	-1.28417	1638.82	0.000117477	MNP1	Uncharacterized ORF; Putative mitochondrial-nucleoid specific ribosomal protein; protein abundance decreased in ace2 mutant cells
CAGL0B00264g	-1.27828	216.108	0.0121392	HMLALPHA2	Uncharacterized ORF; Homeobox-domain protein alpha2
CAGL0J01463g	-1.27747	37.3417	0.013389	N/A	Uncharacterized ORF; Putative GPI-linked cell wall protein
CAGL0L03377g	-1.27731	285.062	0.000468667	SIP4	Uncharacterized ORF; Ortholog(s) have RNA polymerase II core promoter proximal region sequence-specific DNA binding, <a href="#GOsection">more</a>
CAGL0G02057g	-1.27384	74.5193	0.0019749	YKR075C	Uncharacterized ORF; Ortholog of <i>S. cerevisiae</i> : YKR075C
CAGL0F01419g	-1.27012	61.2816	0.000260032	AUS1	Verified ORF; Putative sterol transporter
CAGL0K07480g	-1.26803	965.218	2.01409e-05	PGM1	Uncharacterized ORF; Putative phosphoglucomutase
CAGL0L11286g	-1.26794	37.4558	0.0124346	SMA2	Uncharacterized ORF; Ortholog(s) have role in ascospore wall assembly, spore membrane bending pathway and cytoplasm, prospore membrane localization
CAGL0J01699g	-1.26719	2882.96	8.5043e-06	N/A	Uncharacterized ORF
CAGL0G04609g	-1.26555	229.539	3.06339e-06	PKH1	Uncharacterized ORF; Ortholog(s) have protein kinase activity
CAGL0I07887g	-1.26261	1571.3	5.98537e-05	ATG19	Uncharacterized ORF; Ortholog(s) have protein binding, bridging activity and role in CVT pathway, ER-associated protein catabolic process, protein complex localization, protein processing, vesicle organization
CAGL0F04807g	-1.26225	3822.17	0.00321612	OM45	Uncharacterized ORF; Ortholog(s) have role in pathogenesis and cell surface, hyphal cell wall, integral to mitochondrial outer membrane, membrane fraction, plasma membrane, soluble fraction localization
CAGL0I08877g	-1.26214	1980.65	2.59113e-06	MRPS35	Uncharacterized ORF; Ortholog(s) have structural constituent of ribosome activity and mitochondrial small ribosomal subunit localization
CAGL0J01441g	-1.26049	1163.04	5.32025e-05	ADH3	Uncharacterized ORF; Ortholog(s) have alcohol dehydrogenase (NAD) activity, role in NADH oxidation, amino acid catabolic process to alcohol via Ehrlich pathway and mitochondrial matrix, soluble fraction localization
CAGL0G06402g	-1.25943	1000.1	1.4467e-07	CIR2	Uncharacterized ORF; Ortholog(s) have endoplasmic reticulum, mitochondrion localization
CAGL0I10362g	-1.25885	516.63	1.18797e-07	PWP4	Uncharacterized ORF; Cell wall adhesin; predicted GPI anchor; contains tandem repeats
CAGL0F00891g	-1.25456	38.1174	0.0382337	LSD2	Uncharacterized ORF; Ortholog(s) have role in ascospore wall assembly and ascospore wall, ascus lipid droplet, prospore membrane localization
CAGL0M01122g	-1.25363	2039.3	0.000202402	MRX8	Uncharacterized ORF; Has domain(s) with predicted GTP binding activity and intracellular localization
CAGL0D03872g	-1.25292	87.0185	0.000396817	N/A	Uncharacterized ORF
CAGL0J05478g	-1.25251	9814.93	2.85851e-05	SWS2	Uncharacterized ORF; Ortholog(s) have role in regulation of sporulation resulting in formation of a cellular spore and cytosol, mitochondrion, nucleus localization
CAGL0D03894g	-1.25186	717.322	1.53811e-07	PRO1	Uncharacterized ORF; Putative gamma-glutamyl phosphate reductase
CAGL0F02695g	-1.24795	1601.01	0.00101062	MRP20	Uncharacterized ORF; Ortholog(s) have structural constituent of ribosome activity, role in mitochondrial translation and mitochondrial large ribosomal subunit localization
CAGL0G05830g	-1.24656	11513.8	0.000123121	CRP1	Uncharacterized ORF; Ortholog(s) have DNA binding activity
CAGL0K04939g	-1.24349	336.558	0.000128418	PPN2	Uncharacterized ORF; Ortholog(s) have endopolyphosphatase activity, role in polyphosphate catabolic process and fungal-type vacuole, vacuolar lumen localization
CAGL0E06072g	-1.23738	224.882	1.0077e-05	YMR181C	Uncharacterized ORF; Ortholog of <i>S. cerevisiae</i> : YMR181C
CAGL0J02904g	-1.23687	3335.14	0.000265282	GIP2	Uncharacterized ORF; Ortholog(s) have protein phosphatase regulator activity, role in glycogen metabolic process, protein dephosphorylation and protein phosphatase type 1 complex localization
CAGL0A04169g	-1.23542	420.257	3.20729e-06	MMR1	Uncharacterized ORF; Ortholog(s) have role in mitochondrion inheritance and cellular bud neck, incipient cellular bud site, mitochondrial outer membrane localization
CAGL0L02431g	-1.23452	1238.35	0.000251173	N/A	Uncharacterized ORF; Has domain(s) with predicted role in cell redox homeostasis
CAGL0J09724g	-1.23351	1107.49	4.82059e-06	MRPL11	Uncharacterized ORF; Ortholog(s) have structural constituent of ribosome activity and mitochondrial large ribosomal subunit localization
CAGL0B00814g	-1.22765	2479.64	2.71251e-05	LSB5	Uncharacterized ORF; Ortholog(s) have role in actin cortical patch localization, actin filament organization, endocytosis and actin cortical patch, spindle pole body localization
CAGL0L08030g	-1.22725	420.279	0.000408057	SLM5	Uncharacterized ORF; Ortholog(s) have asparagine-tRNA ligase activity, role in mitochondrial asparaginyl-tRNA aminoacylation and mitochondrion localization
CAGL0G06776g	-1.22516	698.256	5.70944e-05	MRPL32	Uncharacterized ORF; Ortholog(s) have structural constituent of ribosome activity and mitochondrial inner membrane, mitochondrial large ribosomal subunit localization
CAGL0J06930g	-1.22215	1852.1	1.09504e-06	MRP51	Uncharacterized ORF; Ortholog(s) have structural constituent of ribosome activity, role in mitochondrial translational initiation and mitochondrial small ribosomal subunit localization
CAGL0L02959g	-1.22004	433.105	7.19342e-06	ALY1	Uncharacterized ORF; Ortholog(s) have ubiquitin protein ligase binding activity, role in positive regulation of ubiquitin-dependent endocytosis, regulation of intracellular transport and early endosome, late endosome localization
CAGL0K11638g	-1.21992	48.9205	0.0114177	DGR2	Uncharacterized ORF; Ortholog(s) have cell division site, cell tip, cytosol, nucleus localization
CAGL0K01243g	-1.21775	6969.23	2.71588e-06	MRPL25	Uncharacterized ORF; Ortholog(s) have structural constituent of ribosome activity and mitochondrial large ribosomal subunit localization
CAGL0I07969g	-1.21628	2892.09	0.00137752	ATP19	Uncharacterized ORF; Ortholog(s) have hydrogen ion transporting ATP synthase activity, rotational mechanism activity and role in ATP synthesis coupled proton transport, mitochondrial proton-transporting ATP synthase complex assembly
CAGL0E06248g	-1.21615	203.898	0.000127232	RCN1	Verified ORF; Regulator of calcineurin; required for cell growth and activation of the calcineurin-Crz1 pathway in the presence of micafungin; activates calcineurin-dependent signaling
CAGL0K04609g	-1.21563	33322.1	0.000738244	VHT1	Uncharacterized ORF; Has domain(s) with predicted integral to membrane localization
CAGL0G01903g	-1.21531	492.216	8.6108e-08	MET1	Uncharacterized ORF; Ortholog(s) have uroporphyrin-III C-methyltransferase activity and role in cellular response to drug, methionine biosynthetic process, siroheme biosynthetic process
CAGL0F02519g	-1.21525	665.717	0.000452426	YJL206C	Uncharacterized ORF; Has domain(s) with predicted DNA binding, sequence-specific DNA binding transcription factor activity, zinc ion binding activity, role in regulation of transcription, DNA-dependent, transcription, DNA-dependent and nucleus localization
CAGL0E05830g	-1.21393	4609.77	0.000315675	CBP3	Uncharacterized ORF; Ortholog(s) have ribosome binding activity, role in mitochondrial respiratory chain complex III assembly, positive regulation of mitochondrial translation and integral to mitochondrial membrane, mitochondrial ribosome localization
CAGL0H02717g	-1.21366	50.3022	0.0102756	PUS5	Uncharacterized ORF; Ortholog(s) have pseudouridylate synthase activity, role in pseudouridine synthesis, rRNA modification and mitochondrion localization
CAGL0D06743g	-1.2122	715.862	3.70185e-07	EPA21	Putative adhesin-like protein with a predicted GPI-anchor; belongs to adhesin cluster I
CAGL0B03069g	-1.21218	3368.96	7.30271e-07	TAL1	Verified ORF; Putative transaldolase; expression upregulated in biofilm vs planktonic cell culture
CAGL0M12947g	-1.20956	941.672	0.00126505	PUP1	Verified ORF; Mitochondria-localized protein; gene is upregulated in azole-resistant strain
CAGL0I03036g	-1.20619	3912.81	0.000616171	MRPL10	Uncharacterized ORF; Ortholog(s) have structural constituent of ribosome activity and mitochondrial large ribosomal subunit, nucleolus localization
CAGL0L12254g	-1.20505	460.82	2.12676e-05	ALT1	Uncharacterized ORF; Ortholog(s) have L-alanine:2-oxoglutarate aminotransferase activity, role in alanine biosynthetic process, alanine catabolic process, cellular response to drug and cytosol, mitochondrion, nucleus localization
CAGL0F05863g	-1.20491	9989.87	2.93249e-05	SDH4	Uncharacterized ORF; Ortholog(s) have succinate dehydrogenase (ubiquinone) activity, role in cellular respiration and mitochondrion, plasma membrane localization
CAGL0K05390g	-1.20245	3748.78	0.000154855	N/A	Uncharacterized ORF
CAGL0H03883g	-1.19841	3188.62	0.00010253	MRP7	Uncharacterized ORF; Ortholog(s) have structural constituent of ribosome activity and mitochondrial large ribosomal subunit localization
CAGL0G08019g	-1.1976	208.475	0.00382329	ILT1	Uncharacterized ORF; Ortholog(s) have plasma membrane localization
CAGL0H08283g	-1.19366	3822.33	0.0147864	HSP10	Uncharacterized ORF; Ortholog(s) have chaperone binding, unfolded protein binding activity, role in protein refolding and mitochondrial matrix localization
CAGL0G03905g	-1.19309	347.303	7.43176e-05	ISA1	Uncharacterized ORF; Ortholog(s) have iron ion binding activity, role in biotin biosynthetic process, cellular iron ion homeostasis, iron-sulfur cluster assembly and mitochondrial matrix localization
CAGL0C04697g	-1.1929	799.589	0.000298112	RSM26	Uncharacterized ORF; Ortholog(s) have structural constituent of ribosome activity, role in cellular response to drug and mitochondrial small ribosomal subunit localization
CAGL0K07590g	-1.19266	1892.14	7.6547e-05	MYO3	Uncharacterized ORF; Putative myosin
CAGL0M13343g	-1.19215	4227.83	0.000307585	GND1	Verified ORF; 6-phosphogluconate dehydrogenase
CAGL0G04807g	-1.19037	394.2	5.3086e-07	VAM3	Uncharacterized ORF; Ortholog(s) have SNAP receptor activity, protein homodimerization activity
CAGL0J07502g	-1.18666	1094.79	0.000836042	YNL234W	Uncharacterized ORF; Putative protein similar to globins with a heme-binding domain; gene is upregulated in azole-resistant strain
CAGL0K12980g	-1.18394	5197.38	1.99171e-05	BMT7	Uncharacterized ORF; Beta mannosyltransferase
CAGL0H00572g	-1.18328	4645.14	0.0237525	TDA4	Uncharacterized ORF; Ortholog(s) have endoplasmic reticulum localization
CAGL0F05401g	-1.18196	1572.87	0.000488751	MSC2	Uncharacterized ORF; Ortholog(s) have zinc ion transmembrane transporter activity, role in cellular zinc ion homeostasis, transmembrane transport, zinc ion transport and endoplasmic reticulum localization
CAGL0I07139g	-1.18155	3132.41	2.92493e-05	LSC1	Uncharacterized ORF; Ortholog(s) have succinate-CoA ligase (ADP-forming) activity, role in succinyl-CoA metabolic process and mitochondrial nucleoid localization
CAGL0G07953g	-1.18127	367.54	0.00130464	RSM19	Uncharacterized ORF; Ortholog(s) have structural constituent of ribosome activity and mitochondrial small ribosomal subunit localization
CAGL0F02513g	-1.18113	1611.34	4.48462e-05	NCE101	Uncharacterized ORF; Ortholog(s) have role in protein secretion
CAGL0D05632g	-1.17885	1076	0.000110795	COX17	Uncharacterized ORF; Ortholog(s) have copper chaperone activity, role in intracellular copper ion transport, mitochondrial respiratory chain complex IV assembly and cytosol, mitochondrial intermembrane space, nucleus localization
CAGL0A04389g	-1.1783	2879.04	1.61254e-06	CMC2	Uncharacterized ORF; Ortholog(s) have role in mitochondrial respiratory chain complex assembly and mitochondrial intermembrane space, nucleus localization
CAGL0I04048g	-1.17739	746.673	0.012054	N/A	Uncharacterized ORF; Ortholog(s) have cytosol, nucleus localization
CAGL0K12518g	-1.17685	159.275	0.00781868	AGX1	Uncharacterized ORF; Ortholog(s) have alanine-glyoxylate transaminase activity, role in glycine biosynthetic process, by transamination of glyoxylate and mitochondrion localization
CAGL0B04543g	-1.17656	311.187	0.000396279	CRC1	Uncharacterized ORF; Ortholog(s) have carnitine:acyl carnitine antiporter activity, role in fatty acid metabolic process and mitochondrial inner membrane, plasma membrane localization
CAGL0L05280g	-1.1742	862.566	4.64579e-05	CYT2	Uncharacterized ORF; Ortholog(s) have holocytochrome-c synthase activity, role in cytochrome c-heme linkage and cytosol, mitochondrial intermembrane space, nucleus localization
CAGL0M11902g	-1.17291	1637.07	0.0174225	FUN19	Uncharacterized ORF; Ortholog of <i>S. cerevisiae</i> : FUN19
CAGL0H08712g	-1.16675	192.496	0.000143663	N/A	Uncharacterized ORF; Has domain(s) with predicted phosphatidylinositol binding activity and role in cell communication
CAGL0K02717g	-1.16646	1995.42	0.0036106	MRP4	Uncharacterized ORF; Ortholog(s) have structural constituent of ribosome activity and mitochondrial small ribosomal subunit localization
CAGL0H06743g	-1.16403	576.085	4.52891e-06	COA1	Uncharacterized ORF; Ortholog(s) have role in mitochondrial respiratory chain complex IV assembly and integral to mitochondrial inner membrane localization
CAGL0E05170g	-1.16289	2503.8	6.64724e-05	ARI1	Verified ORF; Putative methylglyoxal reductase (NADPH-dependent)
CAGL0J07150g	-1.16234	248.148	4.92264e-05	PIP2	Uncharacterized ORF; Ortholog(s) have RNA polymerase II core promoter proximal region sequence-specific DNA binding, <a href="#GOsection">more</a>
CAGL0K05797g	-1.16098	1659.15	0.000791301	EMI1	Uncharacterized ORF; Ortholog(s) have role in ascospore formation, mitochondrial respiratory chain complex assembly, positive regulation of transcription from RNA polymerase II promoter
CAGL0M02673g	-1.15899	1556.16	3.90701e-06	COX11	Uncharacterized ORF; Ortholog(s) have copper ion binding activity, role in aerobic respiration, protein complex assembly and mitochondrial inner membrane, mitochondrial ribosome, plasma membrane localization
CAGL0H04389g	-1.15832	456.588	5.88201e-05	GEP4	Uncharacterized ORF; Ortholog(s) have phosphatidylglycerophosphatase activity, role in cardiolipin biosynthetic process, phosphorylated carbohydrate dephosphorylation and mitochondrial matrix localization
CAGL0G04081g	-1.15769	390.147	0.0039976	THI73	Uncharacterized ORF; Ortholog(s) have Golgi apparatus, cell division site, cell tip, endoplasmic reticulum localization
CAGL0G07821g	-1.15726	4011.36	0.00070195	GTF1	Uncharacterized ORF; Ortholog(s) have glutaminyl-tRNA synthase (glutamine-hydrolyzing) activity, role in glutaminyl-tRNAGln biosynthesis via transamidation and glutamyl-tRNA(Gln) amidotransferase complex, mitochondrion localization
CAGL0A04103g	-1.15361	3260.04	1.78484e-05	UPS1	Uncharacterized ORF; Ortholog(s) have role in cardiolipin metabolic process, positive regulation of phosphatidylcholine biosynthetic process and cytosol, extrinsic to mitochondrial inner membrane, mitochondrial intermembrane space, nucleus localization
CAGL0M09603g	-1.15175	2940.64	1.64354e-05	MRPS8	Uncharacterized ORF; Ortholog(s) have structural constituent of ribosome activity and mitochondrial small ribosomal subunit localization
CAGL0H10120g	-1.15154	989.852	0.00628966	MRX18	Uncharacterized ORF; Ortholog(s) have glucan endo-1,6-beta-glucosidase activity and cytosol, nucleus localization
CAGL0G04675g	-1.15112	1731.1	4.83289e-05	RSM28	Uncharacterized ORF; Ortholog(s) have structural constituent of ribosome activity, role in cytoplasmic translation, translational initiation and mitochondrial small ribosomal subunit localization
CAGL0B01815g	-1.15043	696.349	3.20729e-06	MRPL1	Uncharacterized ORF; Ortholog(s) have structural constituent of ribosome activity and mitochondrial large ribosomal subunit, nucleolus localization
CAGL0D05280g	-1.14756	352.101	0.00242727	MET10	Uncharacterized ORF; Ortholog(s) have sulfite reductase (NADPH) activity, role in sulfate assimilation and cytosol, sulfite reductase complex (NADPH) localization
CAGL0J06380g	-1.14705	16020.6	0.00145596	INH1	Uncharacterized ORF; Ortholog(s) have enzyme inhibitor activity, role in negative regulation of ATPase activity and mitochondrion, nucleus localization
CAGL0K11462g	-1.14546	1865.61	1.69587e-05	HTB1	Uncharacterized ORF; Ortholog(s) have DNA binding activity and role in chromatin assembly or disassembly, negative regulation of transcription from RNA polymerase II promoter, postreplication repair
CAGL0C00539g	-1.14481	492.973	9.03235e-06	AGP2	Uncharacterized ORF; Ortholog(s) have carnitine transporter activity, polyamine transmembrane transporter activity and role in carnitine transport, fatty acid metabolic process, polyamine transport, response to osmotic stress, transmembrane transport
CAGL0H02519g	-1.14387	1546.4	0.000128166	YMR253C	Uncharacterized ORF has domain(s) with predicted integral component of membrane localization
CAGL0J09922g	-1.14247	1759.82	9.63424e-06	SUN4	Uncharacterized ORF; Ortholog(s) have role in cellular response to biotic stimulus, cytokinetic cell separation and filamentous growth of a population of unicellular organisms in response to biotic stimulus, <a href="#GOsection">more</a>
CAGL0L01177g	-1.14229	2025.83	0.000607589	FRD1	Uncharacterized ORF; Putative soluble fumarate reductase
CAGL0L06732g	-1.14046	1023.95	0.00115118	MRPS9	Uncharacterized ORF; Ortholog(s) have structural constituent of ribosome activity, role in aerobic respiration and mitochondrial small ribosomal subunit localization
CAGL0F04609g	-1.13706	3749.75	4.62804e-06	EDE1	Uncharacterized ORF; Ortholog(s) have ubiquitin binding activity, role in endocytosis, endoplasmic reticulum unfolded protein response and actin cortical patch, cellular bud neck, cellular bud tip, mating projection tip localization
CAGL0E04356g	-1.13616	3157.24	0.00676257	SOD2	Uncharacterized ORF; Ortholog(s) have superoxide dismutase activity
CAGL0M03311g	-1.1361	5398.25	0.000638161	GTT3	Uncharacterized ORF; Ortholog(s) have plasma membrane localization
CAGL0G01254g	-1.13503	1634.21	1.45273e-06	ARO8	Verified ORF; Putative aromatic aminotransferase I
CAGL0J08074g	-1.13323	330.969	1.32887e-06	PDR17	Uncharacterized ORF; Ortholog(s) have phosphatidylinositol transporter activity, role in phospholipid biosynthetic process, phospholipid transport, response to drug and endosome localization
CAGL0I05522g	-1.13126	1339.32	0.000430544	UBP9	Uncharacterized ORF; Has domain(s) with predicted ubiquitin thiolesterase activity and role in ubiquitin-dependent protein catabolic process
CAGL0J02838g	-1.13064	2003.5	0.000765634	RSM18	Uncharacterized ORF; Ortholog(s) have structural constituent of ribosome activity and mitochondrial small ribosomal subunit localization
CAGL0J03058g	-1.12584	221.417	0.00322252	ICL1	Uncharacterized ORF; Ortholog(s) have isocitrate lyase activity, role in glyoxylate cycle, pathogenesis and cytosol, peroxisome localization
CAGL0I06831g	-1.12556	1765.03	0.000690475	COX15	Uncharacterized ORF; Ortholog(s) have electron carrier activity, oxidoreductase activity, acting on NADH or NADPH, heme protein as acceptor activity and role in electron transport chain, heme a biosynthetic process
CAGL0B01639g	-1.12364	5164.13	0.00664253	RGP1	Uncharacterized ORF; Ortholog(s) have guanyl-nucleotide exchange factor activity, role in retrograde transport, endosome to Golgi and Golgi membrane, Ric1p-Rgp1p complex, guanyl-nucleotide exchange factor complex localization
CAGL0L12914g	-1.1236	3674.49	0.000340319	LPX2	Uncharacterized ORF; Ortholog of <i>S. cerevisiae</i> : YKL050C
CAGL0G09064g	-1.11972	201.589	0.00126576	YIG1	Uncharacterized ORF; Ortholog(s) have role in glycerol biosynthetic process and cytosol, nucleus localization
CAGL0L06974g	-1.11933	1465.39	0.00168514	YDL086W	Uncharacterized ORF has domain(s) with predicted hydrolase activity
CAGL0I04818g	-1.11845	1762.64	0.000107917	CHS2	Uncharacterized ORF; Ortholog(s) have chitin synthase activity, role in actomyosin contractile ring contraction, barrier septum assembly, cell wall chitin biosynthetic process, pathogenesis and cell septum, cellular bud neck localization
CAGL0M05445g	-1.11783	388.385	0.000320378	COS111	Uncharacterized ORF; Ortholog(s) have role in signal transduction and mitochondrion localization
CAGL0M09614g	-1.11545	241.011	0.000711291	AIM36	Uncharacterized ORF; Ortholog(s) have mitochondrion, plasma membrane localization
CAGL0K10912g	-1.11457	3120.1	6.39824e-05	MRPL24	Uncharacterized ORF; Ortholog(s) have structural constituent of ribosome activity and mitochondrial large ribosomal subunit localization
CAGL0H02233g	-1.112	978.216	0.00106897	PPA2	Uncharacterized ORF; Ortholog(s) have inorganic diphosphatase activity, role in aerobic respiration and mitochondrion localization
CAGL0F07777g	-1.11019	570.522	0.0088222	ALD3	Uncharacterized ORF; Putative aldehyde dehydrogenase; expression upregulated in biofilm vs planktonic cell culture
CAGL0E01793g	-1.11016	19609.6	2.82906e-05	YPS6	Uncharacterized ORF; Putative aspartic protease; predicted GPI-anchor; member of a YPS gene cluster that is required for virulence in mice; expression induced at high temperature
CAGL0I01804g	-1.11001	1394.25	0.000267984	MRPL6	Uncharacterized ORF; Ortholog(s) have structural constituent of ribosome activity and mitochondrial large ribosomal subunit, nucleus localization
CAGL0L10043g	-1.10831	1186.64	0.00193209	STD1	Uncharacterized ORF; Ortholog(s) have protein kinase activator activity
CAGL0E03630g	-1.10768	391.617	0.0110213	RIM4	Uncharacterized ORF; Ortholog(s) have RNA binding activity and role in negative regulation of conjugation with cellular fusion, premeiotic DNA replication, reciprocal meiotic recombination, sporulation resulting in formation of a cellular spore
CAGL0H02123g	-1.10373	530.136	5.8229e-05	NAM8	Uncharacterized ORF; Ortholog(s) have mRNA binding activity, role in mRNA splice site selection, positive regulation of nuclear mRNA splicing, via spliceosome and U1 snRNP, U2-type prespliceosome, commitment complex localization
CAGL0M10219g	-1.10175	459.11	0.0364758	LAC1	Uncharacterized ORF; Putative ceramide synthase component; gene is upregulated in azole-resistant strain
CAGL0G03927g	-1.10127	94.7258	0.0024026	TPO1	Uncharacterized ORF; Ortholog(s) have drug transmembrane transporter activity, spermidine transmembrane transporter activity, spermine transmembrane transporter activity
CAGL0K09856g	-1.10081	1184.57	0.000276403	YNL092W	Uncharacterized ORF; Ortholog(s) have S-adenosylmethionine-dependent methyltransferase activity and role in protein methylation
CAGL0L08932g	-1.10062	8846.02	0.000292227	LSP1	Verified ORF; Long chain base-responsive inhibitor of protein kinases; protein abundance decreased in ace2 mutant cells
CAGL0D03322g	-1.09979	565.224	0.00391133	IZH3	Uncharacterized ORF; Ortholog(s) have role in cellular zinc ion homeostasis and endoplasmic reticulum localization
CAGL0I05098g	-1.09968	2687.77	1.06552e-06	SBH1	Uncharacterized ORF; Ortholog(s) have ARF guanyl-nucleotide exchange factor activity, P-P-bond-hydrolysis-driven protein transmembrane transporter activity
CAGL0J05258g	-1.09836	1802.17	1.43464e-06	MRPL8	Uncharacterized ORF; Ortholog(s) have structural constituent of ribosome activity, role in mitochondrial genome maintenance and mitochondrial large ribosomal subunit localization
CAGL0J09262g	-1.09724	4305.38	0.0123195	STF1	Uncharacterized ORF; Ortholog(s) have role in negative regulation of ATPase activity and mitochondrion localization
CAGL0J09856g	-1.09687	1879.61	0.00386	MRPL36	Uncharacterized ORF; Ortholog(s) have structural constituent of ribosome activity and mitochondrial large ribosomal subunit localization
CAGL0L04070g	-1.09442	939.213	0.00163223	MRO35	Uncharacterized ORF; Ortholog(s) have structural constituent of ribosome activity and mitochondrial large ribosomal subunit, mitochondrion localization
CAGL0H00209g	-1.09192	372.54	3.68295e-05	N/A	Uncharacterized ORF
CAGL0L02343g	-1.0916	4196.56	2.3759e-06	IRC22	Uncharacterized ORF; Ortholog(s) have endoplasmic reticulum localization
CAGL0I02200g	-1.09125	1722.81	0.000609347	SOL3	Uncharacterized ORF; Putative 6-phosphogluconolactonase
CAGL0H01397g	-1.08994	3911.13	0.000204931	ATP5	Uncharacterized ORF; Ortholog(s) have hydrogen ion transporting ATP synthase activity, rotational mechanism, proton-transporting ATPase activity, rotational mechanism activity and role in ATP synthesis coupled proton transport
CAGL0D00902g	-1.0899	194.204	0.0121756	RAD59	Uncharacterized ORF; Ortholog(s) have DNA strand annealing activity, role in double-strand break repair via single-strand annealing, telomere maintenance via recombination and nucleus localization
CAGL0M08338g	-1.0896	3067.11	0.000524325	MRPL38	Uncharacterized ORF; Ortholog(s) have structural constituent of ribosome activity and mitochondrial large ribosomal subunit localization
CAGL0M09581g	-1.08717	2472.53	3.99026e-05	ATP1	Uncharacterized ORF; F1F0-ATPase complex, F1 alpha subunit
CAGL0L08074g	-1.08405	1200.33	5.17336e-05	SYP1	Uncharacterized ORF; Ortholog(s) have role in actin cortical patch assembly, septin cytoskeleton organization and cellular bud neck, cellular bud tip, mating projection base, mating projection tip localization
CAGL0H06435g	-1.08343	2132.74	0.000285468	ECM19	Uncharacterized ORF; Ortholog(s) have role in fungal-type cell wall organization and mitochondrion localization
CAGL0I10200g	-1.08337	286.342	0.00245668	PWP3	Uncharacterized ORF; Protein with tandem repeats; putative adhesin-like protein
CAGL0F04411g	-1.08306	2677.51	0.000219721	MRPL16	Uncharacterized ORF; Ortholog(s) have structural constituent of ribosome activity and mitochondrial large ribosomal subunit localization
CAGL0L12342g	-1.0823	538.903	0.000104538	SUL2	Uncharacterized ORF; Ortholog(s) have sulfate transmembrane transporter activity, role in sulfate transport and Golgi apparatus, plasma membrane, plasma membrane enriched fraction localization
CAGL0K08316g	-1.08066	1007.39	0.00750324	RHO4	Uncharacterized ORF; Ortholog(s) have GTPase activity and role in GTP catabolic process, cytokinetic cell separation, maintenance of cell polarity, positive regulation of formin-nucleated actin cable assembly
CAGL0D04092g	-1.07772	336.317	1.13602e-05	DOG2	Uncharacterized ORF; 2-deoxyglucose-6-phosphate phosphatase
CAGL0H04565g	-1.07727	1563.33	0.00323991	MRP21	Uncharacterized ORF; Ortholog(s) have structural constituent of ribosome activity, role in mitochondrial translational initiation and mitochondrial small ribosomal subunit localization
CAGL0E02387g	-1.07566	312.54	0.0115481	COQ10	Uncharacterized ORF; Ortholog(s) have ubiquinone binding activity, role in cellular respiration and mitochondrial inner membrane localization
CAGL0H05907g	-1.07485	323.742	8.64453e-05	MSD1	Uncharacterized ORF; Ortholog(s) have aspartate-tRNA ligase activity, role in mitochondrial aspartyl-tRNA aminoacylation and mitochondrion localization
CAGL0I09372g	-1.07439	576.466	0.000330279	MRPL37	Uncharacterized ORF; Ortholog(s) have structural constituent of ribosome activity and mitochondrial large ribosomal subunit localization
CAGL0B01925g	-1.07436	827.806	0.00088867	KIN1	Uncharacterized ORF; Ortholog(s) have protein serine/threonine kinase activity, role in exocytosis, protein autophosphorylation and internal side of plasma membrane localization
CAGL0A02387g	-1.07424	645.318	0.00105657	MRP1	Uncharacterized ORF; Ortholog(s) have structural constituent of ribosome activity and mitochondrial small ribosomal subunit localization
CAGL0H00781g	-1.07353	612.597	5.49131e-05	YPL247C	Uncharacterized ORF; Ortholog of <i>S. cerevisiae</i> : YPL247C
CAGL0K01683g	-1.07332	993.145	0.00122861	GPD1	Uncharacterized ORF; Putative cytoplasmic glycerol-3-phosphate dehydrogenase (NAD+); protein abundance increased in ace2 mutant cells
CAGL0L13178g	-1.06987	750.843	0.0012253	FMP25	Uncharacterized ORF; Ortholog(s) have role in mitochondrial respiratory chain complex III assembly and integral to mitochondrial inner membrane localization
CAGL0L10186g	-1.06904	33081.6	0.0240491	TMC1	Uncharacterized ORF; Putative stress-induced protein; gene is upregulated in azole-resistant strain
CAGL0G04763g	-1.06865	1119.66	0.0415676	RGS2	Uncharacterized ORF; Ortholog(s) have GTPase activator activity, role in adenylate cyclase-modulating G-protein coupled receptor signaling pathway and cytoplasm, nucleus localization
CAGL0M01100g	-1.0686	3684.24	0.00294411	MRPS28	Uncharacterized ORF; Ortholog(s) have structural constituent of ribosome activity and mitochondrial small ribosomal subunit localization
CAGL0J10076g	-1.06681	809.886	8.07743e-05	YNL058C	Uncharacterized ORF; Ortholog of <i>S. cerevisiae</i> : YNL058C
CAGL0M11236g	-1.06652	2927.89	9.3981e-05	MRPL44	Uncharacterized ORF; Ortholog(s) have structural constituent of ribosome activity and mitochondrial large ribosomal subunit localization
CAGL0F00869g	-1.06651	350.8	0.00910947	RRT8	Uncharacterized ORF; Ortholog(s) have lipid particle localization
CAGL0G08844g	-1.06361	972.551	0.00215061	ASG1	Uncharacterized ORF; Ortholog(s) have sequence-specific DNA binding activity
CAGL0D00704g	-1.06359	1142.98	0.000703193	YET3	Uncharacterized ORF; Ortholog(s) have endoplasmic reticulum, plasma membrane localization
CAGL0B00154g	-1.06267	15646.4	0.00999899	AWP8	Putative adhesin-like protein
CAGL0K11044g	-1.06185	826.954	1.70268e-05	MRPL7	Uncharacterized ORF; Ortholog(s) have structural constituent of ribosome activity and mitochondrial large ribosomal subunit localization
CAGL0I05918g	-1.0588	191.617	0.00172921	TIM17	Uncharacterized ORF; Ortholog(s) have protein channel activity, role in mitochondrial genome maintenance, protein import into mitochondrial matrix and mitochondrial inner membrane presequence translocase complex localization
CAGL0F09163g	-1.05438	1806.48	0.000344082	FMP10	Uncharacterized ORF; Ortholog(s) have mitochondrion localization
CAGL0B03839g	-1.05111	455.754	5.85818e-05	MET3	Uncharacterized ORF; Ortholog(s) have sulfate adenylyltransferase (ATP) activity, role in cysteine biosynthetic process, methionine biosynthetic process, sulfate assimilation and cytosol, mitochondrion localization
CAGL0B03267g	-1.05047	3107.44	0.000201432	MRPL27	Uncharacterized ORF; Ortholog(s) have structural constituent of ribosome activity and mitochondrial large ribosomal subunit localization
CAGL0I06380g	-1.04959	486.976	2.07582e-06	RPM2	Uncharacterized ORF; Putative mitochondrial RNase P precursor; gene used for molecular typing of <i>C. glabrata</i> strain isolates
CAGL0J04048g	-1.04954	209.754	0.00315576	ISU2	Uncharacterized ORF; Ortholog(s) have role in cellular iron ion homeostasis, iron-sulfur cluster assembly, tRNA wobble uridine modification and mitochondrial matrix localization
CAGL0C03850g	-1.04928	839.078	0.00409924	DOT5	Uncharacterized ORF; Ortholog(s) have thioredoxin peroxidase activity, role in cell redox homeostasis, cellular response to oxidative stress and cytosol, nucleus localization
CAGL0D04752g	-1.0484	1082.09	0.0100716	YPR127W	Uncharacterized ORF; Ortholog(s) have aldo-keto reductase (NADP) activity, oxidoreductase activity, pyridoxine:NADP 4-dehydrogenase activity and role in pyridoxal biosynthetic process
CAGL0G07513g	-1.04751	1117.92	0.00165379	ATP12	Uncharacterized ORF; Ortholog(s) have protein domain specific binding activity, role in mitochondrial proton-transporting ATP synthase complex assembly and mitochondrion localization
CAGL0M07986g	-1.04726	569.893	0.000408057	PET191	Uncharacterized ORF; Ortholog(s) have role in mitochondrial respiratory chain complex IV assembly and cytosol, integral to mitochondrial inner membrane, nucleus localization
CAGL0D00770g	-1.04637	3073.17	6.18039e-06	IDP1	Uncharacterized ORF; Ortholog(s) have role in glutamate biosynthetic process and mitochondrial nucleoid localization
CAGL0L00649g	-1.04603	403.22	0.00773628	ACS1	Verified ORF; Acetyl-coenzyme A synthetase
CAGL0C01435g	-1.04566	459.587	0.000241415	RTC6	Uncharacterized ORF; Ortholog(s) have role in ribosome biogenesis and mitochondrion localization
CAGL0K06325g	-1.04547	10157.2	0.0119862	HEH2	Uncharacterized ORF; Ortholog(s) have role in meiosis and integral to nuclear inner membrane localization
CAGL0J11484g	-1.0453	1046.64	0.000116026	DUG3	Verified ORF; Component of the Dug1p-Dug2p-Dug3p complex involved in glutathione degradation; required for glutathione utilization in C. glabrata when glutathione import is enabled by expression of the S. cerevisiae Opt1p transporter
CAGL0D03586g	-1.04492	663.78	0.00106826	ACP1	Uncharacterized ORF; Ortholog(s) have role in lipoate biosynthetic process and mitochondrion localization
CAGL0C00825g	-1.04398	136.96	0.000129378	N/A	Uncharacterized ORF
CAGL0J12067g	-1.04393	298.07	9.63197e-05	N/A	Putative adhesin-like protein; GPI-anchored; belongs to adhesin cluster V
CAGL0D04510g	-1.04303	1282	2.52735e-06	HOB2	Uncharacterized ORF; Ortholog of <i>S. cerevisiae</i> : YPR117W, <i>C. albicans SC5314</i> : orf19.1240, <i>C. parapsilosis CDC317</i> : CPAR2_500480, <i>Candida tenuis NRRL Y-1498</i> : CANTEDRAFT_120679 and <i>Debaryomyces hansenii CBS767</i> : DEHA2C07458g
CAGL0K04521g	-1.04226	184.096	0.000994006	COX18	Uncharacterized ORF; Ortholog(s) have membrane insertase activity, role in protein insertion into mitochondrial membrane from inner side and integral to mitochondrial inner membrane localization
CAGL0I01914g	-1.04205	1490.8	0.000197519	SPO12	Uncharacterized ORF; Ortholog(s) have role in meiosis I, mitotic cell cycle, regulation of exit from mitosis and nucleolus localization
CAGL0K00913g	-1.04012	3936.01	0.000242715	ADE3	Uncharacterized ORF; Ortholog(s) have formate-tetrahydrofolate ligase activity, methenyltetrahydrofolate cyclohydrolase activity, methylenetetrahydrofolate dehydrogenase (NADP+) activity, single-stranded DNA binding activity
CAGL0H01089g	-1.04004	1286.9	0.0145004	INM2	Uncharacterized ORF; Ortholog(s) have inositol monophosphate 1-phosphatase activity and role in inositol phosphate dephosphorylation
CAGL0L03916g	-1.0395	267.793	0.00183747	N/A	Uncharacterized ORF; Has domain(s) with predicted nucleic acid binding, zinc ion binding activity and intracellular localization
CAGL0E00715g	-1.03523	849.81	0.00119425	RSM24	Uncharacterized ORF; Ortholog(s) have structural constituent of ribosome activity and mitochondrial small ribosomal subunit localization
CAGL0F01529g	-1.03404	1034.83	0.00114023	MEF1	Uncharacterized ORF; Ortholog(s) have role in mitochondrial translation and mitochondrion localization
CAGL0L06820g	-1.03308	1059.76	0.000114552	MRK1	Uncharacterized ORF; Ortholog(s) have protein serine/threonine kinase activity and role in protein phosphorylation, regulation of protein catabolic process, response to stress
CAGL0H09856g	-1.02499	3299.25	0.00101787	HHT3	Uncharacterized ORF; Ortholog(s) have role in chromatin silencing at centromere, response to DNA damage stimulus and nucleus localization
CAGL0J08272g	-1.0246	704.528	9.87476e-06	GOR1	Uncharacterized ORF; Ortholog(s) have glyoxylate reductase activity, role in glyoxylate catabolic process and cytosol, mitochondrion, nucleus localization
CAGL0D01144g	-1.02428	879.906	6.4982e-05	CBP6	Uncharacterized ORF; Ortholog(s) have ribosome binding activity, role in mitochondrial respiratory chain complex III assembly, positive regulation of mitochondrial translation and mitochondrial ribosome localization
CAGL0H00506g	-1.02413	5860.5	0.000536668	ATP2	Verified ORF; F1F0-ATPase complex, F1 beta subunit; expression upregulated in biofilm vs planktonic cell culture; protein abundance decreased in ace2 mutant cells
CAGL0F04213g	-1.02059	2308.93	7.06099e-05	PET9	Uncharacterized ORF; Ortholog(s) have ATP:ADP antiporter activity and role in ADP transport, ATP transport, aerobic respiration, anaerobic respiration, apoptotic process, heme transport, mitochondrial transport
CAGL0E03520g	-1.01943	3461.98	0.00232003	MRPL15	Uncharacterized ORF; Ortholog(s) have structural constituent of ribosome activity and mitochondrial large ribosomal subunit localization
CAGL0J00429g	-1.01817	7444.71	0.00224038	COX6	Uncharacterized ORF; Cytochrome c oxidase subunit VI
CAGL0J10230g	-1.01594	798.777	0.00144786	MSK1	Uncharacterized ORF; Ortholog(s) have lysine-tRNA ligase activity, role in mitochondrial lysyl-tRNA aminoacylation, tRNA import into mitochondrion and mitochondrion localization
CAGL0K02409g	-1.01213	23442.1	0.00282025	ATP20	Uncharacterized ORF; Ortholog(s) have proton-transporting ATPase activity, rotational mechanism, structural molecule activity and role in ATP synthesis coupled proton transport, cristae formation, protein oligomerization
CAGL0M10021g	-1.01042	119.406	0.0416873	N/A	Uncharacterized ORF
CAGL0L04598g	-1.00886	928.427	0.00497422	DCS2	Uncharacterized ORF; Ortholog(s) have m7G(5')pppN diphosphatase activity, role in deadenylation-dependent decapping of nuclear-transcribed mRNA and cytoplasmic mRNA processing body, cytosol, nucleus localization
CAGL0G01166g	-1.00798	1118.62	6.86196e-06	DIC1	Uncharacterized ORF; Ortholog(s) have dicarboxylic acid transmembrane transporter activity, role in dicarboxylic acid transport and mitochondrial envelope, plasma membrane localization
CAGL0K11341g	-1.0066	1766.13	0.000589799	COX20	Uncharacterized ORF; Ortholog(s) have unfolded protein binding activity, role in aerobic respiration, mitochondrial respiratory chain complex IV assembly, protein processing and mitochondrial inner membrane localization
CAGL0K02651g	-1.00657	553.19	2.86621e-05	YHL008C	Uncharacterized ORF; Ortholog(s) have small molecule sensor activity and role in chloride transport, regulation of chloride transport
CAGL0F05885g	-1.00632	617.703	0.00546098	HOF1	Uncharacterized ORF; Ortholog(s) have cytoskeletal protein binding activity
CAGL0E02607g	-1.00248	5151.53	0.0304608	YPT7	Uncharacterized ORF; Ortholog(s) have GTPase activity
CAGL0L10582g	-1.00176	1790.88	0.00401055	YMR196W	Uncharacterized ORF has domain(s) with predicted mannosyl-oligosaccharide glucosidase activity and role in oligosaccharide metabolic process
CAGL0I05698g	-1.00073	1216.47	2.80465e-05	N/A	Uncharacterized ORF; Has domain(s) with predicted 6-phosphofructokinase activity, role in glycolysis and 6-phosphofructokinase complex localization

## Sheet: Data 2b
Data 2b	Enriched gene ontology (GO) terms for biological process (BP), molecular function (MF), and cellular component (CC) of proteins encoded by genes that were upregulated (A) and downregulated (B) in response to micafungin exposure in the wild-type strain
(A) Upregulated genes
GO category	GOID	GO_term	Cluster frequency	Background frequency	Corrected P-value	False discovery rate	Gene(s) annotated to the term	Directly Annotated GOID List
BP	42254	ribosome biogenesis	25 out of 372 genes, 6.7%	65 out of 5614 background genes, 1.2%	2.14e-11	0	CAGL0A04037g:CAGL0B00484g:CAGL0D04180g:CAGL0E02343g:CAGL0E02585g:CAGL0E02717g:CAGL0E05874g:CAGL0G00484g:RPP0:CAGL0G01991g:CAGL0G02629g:CAGL0H02057g:CAGL0H02079g:CAGL0H02937g:CAGL0I07975g:CAGL0I10670g:CAGL0J01265g:CAGL0J10252g:CAGL0J10802g:CAGL0K02387g:CAGL0K06215g:CAGL0L07678g:CAGL0M05775g:CAGL0M09845g:CAGL0M11110g	42254:32259:6396:42274:6364:30490:70475:467:1522:154:42255:462
BP	22613	ribonucleoprotein complex biogenesis	26 out of 372 genes, 7.0%	76 out of 5614 background genes, 1.4%	1.69e-10	0	CAGL0A04037g:CAGL0B00484g:CAGL0D01628g:CAGL0D04180g:CAGL0E02343g:CAGL0E02585g:CAGL0E02717g:CAGL0E05874g:CAGL0G00484g:RPP0:CAGL0G01991g:CAGL0G02629g:CAGL0H02057g:CAGL0H02079g:CAGL0H02937g:CAGL0I07975g:CAGL0I10670g:CAGL0J01265g:CAGL0J10252g:CAGL0J10802g:CAGL0K02387g:CAGL0K06215g:CAGL0L07678g:CAGL0M05775g:CAGL0M09845g:CAGL0M11110g	42254:32259:6396:387:42274:6364:30490:70475:1522:467:154:42255:462
BP	34470	ncRNA processing	26 out of 372 genes, 7.0%	82 out of 5614 background genes, 1.5%	1.26e-09	0	CAGL0A04037g:CAGL0B00484g:CAGL0C03784g:CAGL0D04180g:CAGL0E01903g:CAGL0E02585g:CAGL0E02717g:CAGL0G00484g:CAGL0G02629g:CAGL0H02079g:CAGL0H02937g:CAGL0H10406g:CAGL0I07975g:CAGL0J01265g:CAGL0J09746g:CAGL0J10252g:CAGL0K00957g:CAGL0K02387g:CAGL0K06215g:CAGL0L04026g:CAGL0L05566g:CAGL0L07678g:CAGL0M06039g:CAGL0M06809g:CAGL0M09845g:CAGL0M11110g	32259:6396:1682:30488:6364:30490:31591:6400:70475:34227:467:154:8033:462:2098
BP	6364	rRNA processing	17 out of 372 genes, 4.6%	41 out of 5614 background genes, 0.7%	5.48e-08	0	CAGL0A04037g:CAGL0B00484g:CAGL0D04180g:CAGL0E02585g:CAGL0E02717g:CAGL0G00484g:CAGL0G02629g:CAGL0H02079g:CAGL0H02937g:CAGL0I07975g:CAGL0J01265g:CAGL0J10252g:CAGL0K02387g:CAGL0K06215g:CAGL0L07678g:CAGL0M09845g:CAGL0M11110g	32259:6396:6364:30490:70475:467:154:462
BP	16072	rRNA metabolic process	17 out of 372 genes, 4.6%	42 out of 5614 background genes, 0.7%	8.65e-08	0	CAGL0A04037g:CAGL0B00484g:CAGL0D04180g:CAGL0E02585g:CAGL0E02717g:CAGL0G00484g:CAGL0G02629g:CAGL0H02079g:CAGL0H02937g:CAGL0I07975g:CAGL0J01265g:CAGL0J10252g:CAGL0K02387g:CAGL0K06215g:CAGL0L07678g:CAGL0M09845g:CAGL0M11110g	32259:6396:6364:30490:70475:467:154:462
BP	6396	RNA processing	33 out of 372 genes, 8.9%	159 out of 5614 background genes, 2.8%	5.07e-07	0	CAGL0A04037g:CAGL0B00484g:CAGL0C03784g:CAGL0D01628g:CAGL0D04180g:CAGL0E01903g:CAGL0E02343g:CAGL0E02585g:CAGL0E02717g:CAGL0F07557g:CAGL0F08811g:CAGL0G00484g:CAGL0G02629g:CAGL0H02079g:CAGL0H02937g:CAGL0H03685g:CAGL0H10406g:CAGL0I07975g:CAGL0J01265g:CAGL0J07458g:CAGL0J09746g:CAGL0J10252g:CAGL0K00957g:CAGL0K02387g:CAGL0K06215g:CAGL0K08360g:CAGL0L04026g:CAGL0L05566g:CAGL0L07678g:CAGL0M06039g:CAGL0M068…	398:42254:6397:6396:387:30488:6364:70475:34227:1522:467:154:32259:1682:30490:31591:6400:8033:462:2098
BP	16070	RNA metabolic process	51 out of 372 genes, 13.7%	334 out of 5614 background genes, 5.9%	1.85e-06	0	CAGL0A04037g:CAGL0B00484g:CAGL0C03784g:CAGL0D01628g:CAGL0D03410g:CAGL0D04180g:CAGL0E00979g:CAGL0E01903g:CAGL0E02343g:CAGL0E02453g:CAGL0E02585g:CAGL0E02717g:CAGL0E02893g:CAGL0E05478g:CAGL0E05500g:CAGL0F00561g:CAGL0F07557g:CAGL0F08811g:CAGL0G00484g:CAGL0G02629g:CAGL0G10109g:CAGL0H02057g:CAGL0H02079g:CAGL0H02937g:CAGL0H03685g:CAGL0H10406g:CAGL0I03630g:CAGL0I07975g:SLT2:CAGL0J01265g:CAGL0J07458g:CAGL…	398:6397:6396:6383:51701:6402:70475:34227:1522:34976:6361:6352:32259:1188:1682:30490:6351:6366:8033:462:2098:42254:387:6468:70370:6364:30488:36265:1510:55074:467:154:7165:44419:31505:31591:6400:32884:9266:35690
BP	34660	ncRNA metabolic process	26 out of 372 genes, 7.0%	119 out of 5614 background genes, 2.1%	9.26e-06	0	CAGL0A04037g:CAGL0B00484g:CAGL0C03784g:CAGL0D04180g:CAGL0E01903g:CAGL0E02585g:CAGL0E02717g:CAGL0G00484g:CAGL0G02629g:CAGL0H02079g:CAGL0H02937g:CAGL0H10406g:CAGL0I07975g:CAGL0J01265g:CAGL0J09746g:CAGL0J10252g:CAGL0K00957g:CAGL0K02387g:CAGL0K06215g:CAGL0L04026g:CAGL0L05566g:CAGL0L07678g:CAGL0M06039g:CAGL0M06809g:CAGL0M09845g:CAGL0M11110g	6396:70475:34227:32259:1682:30490:8033:462:2098:30488:6364:467:154:31591:6400
BP	9451	RNA modification	15 out of 372 genes, 4.0%	43 out of 5614 background genes, 0.8%	1.06e-05	0	CAGL0C03784g:CAGL0E00979g:CAGL0E01903g:CAGL0G02629g:CAGL0H02057g:CAGL0H03685g:CAGL0H10406g:CAGL0J09746g:CAGL0J10802g:CAGL0K00957g:CAGL0L04026g:CAGL0L05566g:CAGL0L07678g:CAGL0M06809g:CAGL0M06941g	6396:70475:34227:1522:8033:2098:42254:6364:30488:36265:1510:154:31591:6400
BP	44085	cellular component biogenesis	27 out of 372 genes, 7.3%	154 out of 5614 background genes, 2.7%	0.00055	0	CAGL0A04037g:CAGL0B00484g:CAGL0D01628g:CAGL0D03410g:CAGL0D04180g:CAGL0E02343g:CAGL0E02585g:CAGL0E02717g:CAGL0E05874g:CAGL0G00484g:RPP0:CAGL0G01991g:CAGL0G02629g:CAGL0H02057g:CAGL0H02079g:CAGL0H02937g:CAGL0I07975g:CAGL0I10670g:CAGL0J01265g:CAGL0J10252g:CAGL0J10802g:CAGL0K02387g:CAGL0K06215g:CAGL0L07678g:CAGL0M05775g:CAGL0M09845g:CAGL0M11110g	6396:70475:1522:42255:32259:1188:42274:30490:462:42254:387:6364:467:154
BP	90304	nucleic acid metabolic process	53 out of 372 genes, 14.2%	447 out of 5614 background genes, 8.0%	0.0036	0	CAGL0A04037g:CAGL0B00484g:CAGL0C03784g:CAGL0D01628g:CAGL0D03410g:CAGL0D04180g:CAGL0E00979g:CAGL0E01903g:CAGL0E02343g:CAGL0E02431g:CAGL0E02453g:CAGL0E02585g:CAGL0E02717g:CAGL0E02893g:CAGL0E05478g:CAGL0E05500g:CAGL0F00561g:CAGL0F07557g:CAGL0F08811g:CAGL0G00484g:CAGL0G02629g:CAGL0G10109g:CAGL0H02057g:CAGL0H02079g:CAGL0H02937g:CAGL0H03685g:CAGL0H10406g:CAGL0I03630g:CAGL0I07975g:SLT2:CAGL0J01265g:CAGL…	398:6397:6396:6383:51701:6402:70475:34227:1522:34976:6361:6352:32259:1188:1682:6281:30490:6351:6366:8033:462:2098:42254:6468:387:70370:30488:6364:36265:1510:55074:467:154:7165:44419:31505:31591:6400:35690:9266:32884:6265
BP	6400	tRNA modification	8 out of 372 genes, 2.2%	20 out of 5614 background genes, 0.4%	0.00527	0	CAGL0C03784g:CAGL0E01903g:CAGL0H10406g:CAGL0J09746g:CAGL0K00957g:CAGL0L04026g:CAGL0L05566g:CAGL0M06809g	6396:34227:8033:2098:30488:31591:6400
BP	45229	external encapsulating structure organization	7 out of 372 genes, 1.9%	19 out of 5614 background genes, 0.3%	0.03272	0	CHS3:UTR2:GAS1:CRH1:CAGL0I06644g:CNB1:YPS1	5975:6402:51701:34976:71555:70370:55074:44419:31505:6508:35690
BP	71555	cell wall organization	7 out of 372 genes, 1.9%	19 out of 5614 background genes, 0.3%	0.03272	0	CHS3:UTR2:GAS1:CRH1:CAGL0I06644g:CNB1:YPS1	5975:6402:51701:34976:71555:70370:55074:44419:31505:6508:35690
BP	1510	RNA methylation	6 out of 372 genes, 1.6%	15 out of 5614 background genes, 0.3%	0.05991	0.0027	CAGL0E00979g:CAGL0E01903g:CAGL0G02629g:CAGL0H10406g:CAGL0L05566g:CAGL0M06941g	6396:70475:8033:30488:36265:1510
MF	8173	RNA methyltransferase activity	8 out of 372 genes, 2.2%	17 out of 5614 background genes, 0.3%	0.00076	0	CAGL0E01903g:CAGL0G02629g:CAGL0H10406g:CAGL0J09746g:CAGL0K08360g:CAGL0L05566g:CAGL0L07678g:CAGL0M06941g	16423:8168:106050:8173:160107:70042:179:3723:8176
MF	140098	catalytic activity, acting on RNA	22 out of 372 genes, 5.9%	120 out of 5614 background genes, 2.1%	0.00148	0	CAGL0A04323g:CAGL0E01903g:CAGL0E02453g:CAGL0E02585g:CAGL0E02717g:CAGL0E05500g:CAGL0F00561g:CAGL0G01991g:CAGL0G02629g:SSD1:CAGL0H10406g:CAGL0J09746g:CAGL0K01551g:CAGL0K02387g:CAGL0K08360g:CAGL0L02849g:CAGL0L03872g:CAGL0L05566g:CAGL0L07678g:CAGL0L11660g:CAGL0M05159g:CAGL0M06941g	16423:32549:106388:3676:1055:8168:106050:8173:8270:160107:166:8408:179:46983:3724:3725:4521:5524:3677:4540:70042:4045:3899:3723:175:4525:8176
MF	19843	rRNA binding	7 out of 372 genes, 1.9%	17 out of 5614 background genes, 0.3%	0.00894	0	RPL9A:RPL9B:CAGL0H02079g:CAGL0H05511g:CAGL0I07975g:CAGL0J10252g:CAGL0M04587g	3735:19843:42134:3723
MF	8175	tRNA methyltransferase activity	4 out of 372 genes, 1.1%	6 out of 5614 background genes, 0.1%	0.03964	0.025	CAGL0E01903g:CAGL0H10406g:CAGL0J09746g:CAGL0L05566g	16423:8168:106050:8173:160107:3723:8176
MF	42134	rRNA primary transcript binding	3 out of 372 genes, 0.8%	3 out of 5614 background genes, 0.1%	0.04475	0.024	CAGL0H02079g:CAGL0J10252g:CAGL0M04587g	19843:42134
MF	30515	snoRNA binding	4 out of 372 genes, 1.1%	7 out of 5614 background genes, 0.1%	0.08766	0.03	CAGL0D04180g:CAGL0D04884g:CAGL0J10802g:CAGL0K06215g	34511:30515
CC	5730	nucleolus	6 out of 372 genes, 1.6%	18 out of 5614 background genes, 0.3%	0.03884	0	CAGL0D03410g:CAGL0D04180g:CAGL0E02343g:CAGL0E02893g:CAGL0J01265g:CAGL0M06039g	172:5655:70860:5730
(B) Downregulated genes
GO category	GOID	GO_term	Cluster frequency	Background frequency	Corrected P-value	False discovery rate	Gene(s) annotated to the term	Directly Annotated GOID List
BP	5975	carbohydrate metabolic process	27 out of 530 genes, 5.1%	90 out of 5614 background genes, 1.6%	1.01e-05	0	CAGL0A04829g:TAL1:CAGL0C01397g:CAGL0E01529g:GLK1:CAGL0F04719g:CAGL0F04895g:PFK1:CAGL0F08261g:SCW4:CAGL0G02717g:GDB1:CAGL0H02387g:FBP1:SOL3:CAGL0I04048g:CAGL0I05698g:CAGL0J00451g:GPD1:CAGL0K03421g:CAGL0K04235g:PGM1:CAGL0K10626g:MLS1:CAGL0L10582g:CAGL0M03377g:CTS1	6097:6096:46168:6006:6110:6032:5992:5975:6003:6000:6098:5980:9311:6002:5976:1678:71704:6072:5978
BP	6112	energy reserve metabolic process	6 out of 530 genes, 1.1%	6 out of 5614 background genes, 0.1%	0.00027	0	CAGL0F04719g:GDB1:CAGL0J03080g:CAGL0K10626g:CAGL0M03377g:CAGL0M12551g	5975:6112:5980:5978
BP	6091	generation of precursor metabolites and energy	21 out of 530 genes, 4.0%	69 out of 5614 background genes, 1.2%	0.00028	0	CAGL0A04829g:TAL1:SDH2:CAGL0E02387g:GLK1:CAGL0F04719g:PFK1:CAGL0F08261g:CAGL0G06402g:GDB1:CIT1:SOL3:CAGL0I05698g:COX6:CAGL0J03080g:CAGL0K04235g:CAGL0K10626g:CAGL0L06160g:CAGL0M03377g:CAGL0M12551g:GND1	6096:45333:6744:6101:5975:6112:6098:6099:5980:22900:6002:1678:6123:5978
BP	17004	cytochrome complex assembly	7 out of 530 genes, 1.3%	10 out of 5614 background genes, 0.2%	0.00236	0	CAGL0B04367g:CAGL0D01144g:CAGL0G09262g:CAGL0H06743g:CAGL0I04796g:CAGL0K10120g:CAGL0K11341g	34551:33617:6878:8535
BP	8535	respiratory chain complex IV assembly	6 out of 530 genes, 1.1%	8 out of 5614 background genes, 0.1%	0.00645	0	CAGL0B04367g:CAGL0G09262g:CAGL0H06743g:CAGL0I04796g:CAGL0K10120g:CAGL0K11341g	33617:6878:8535
BP	5977	glycogen metabolic process	4 out of 530 genes, 0.8%	4 out of 5614 background genes, 0.1%	0.03105	0	CAGL0F04719g:GDB1:CAGL0K10626g:CAGL0M03377g	5975:5980:5978
BP	5978	glycogen biosynthetic process	4 out of 530 genes, 0.8%	4 out of 5614 background genes, 0.1%	0.03105	0	CAGL0F04719g:GDB1:CAGL0K10626g:CAGL0M03377g	5975:5980:5978
BP	6790	sulfur compound metabolic process	13 out of 530 genes, 2.5%	46 out of 5614 background genes, 0.8%	0.08805	0.0075	MET3:CAGL0C05071g:MET15:THI6:MET13:MET1:CAGL0G03905g:CAGL0I01276g:CAGL0J04048g:VHT1:PMU3:CAGL0L00649g:STR3	6768:6555:9228:55085:71266:19427:6772:19354:103:16226:19346
BP	44281	small molecule metabolic process	50 out of 530 genes, 9.4%	323 out of 5614 background genes, 5.8%	0.09623	0.0111	CAGL0A04697g:CAGL0A04829g:CAGL0B02431g:TAL1:IDP2:CAGL0C01397g:CAGL0C05071g:IDP1:ACP1:PRO1:CAGL0D04026g:MET15:CAGL0E01529g:CAGL0E02387g:THI6:GLK1:MET13:PFK1:CAGL0F08261g:BAT1:ARO8:GDH2:CAGL0H01397g:CAGL0H02585g:CIT1:CAGL0H05775g:CAGL0H05907g:CAGL0I00418g:CAGL0I01276g:SOL3:CAGL0I05698g:CAGL0J00451g:CAGL0J04268g:CAGL0J10230g:CAGL0K02409g:CAGL0K04235g:VHT1:PMU3:CYB2:CAGL0L00649g:UGP1:CAGL0L02607g:MLS…	19752:6096:6536:45333:6768:6006:6101:6110:5975:6636:6003:9058:6000:6561:1902600:46148:6099:44002:6002:19679:55085:71266:6183:15986:6102:6116:6103:6228:6421:9166:19346:6097:6629:6520:6744:6089:9448:6241:6430:9081:6437:6098:46034:9228:6555:19551:1678:19427:6083:6418:6772:6011:6633:19558
MF	3735	structural constituent of ribosome	32 out of 530 genes, 6.0%	134 out of 5614 background genes, 2.4%	9.77e-05	0	CAGL0B01815g:CAGL0B03267g:CAGL0C01435g:CAGL0C04807g:CAGL0D04158g:CAGL0E00715g:CAGL0E03520g:CAGL0F02695g:CAGL0F04411g:CAGL0G06776g:CAGL0G07931g:CAGL0G07953g:MNP1:CAGL0H03883g:CAGL0H04565g:CAGL0I01804g:CAGL0I03036g:CAGL0J02838g:CAGL0J05258g:CAGL0J05478g:CAGL0J09856g:CAGL0K01243g:CAGL0K02717g:CAGL0K10912g:CAGL0K11044g:CAGL0K12056g:CAGL0L04070g:CAGL0L06732g:CAGL0L10824g:CAGL0M01100g:CAGL0M08338g:CAGL…	3735:19843:3676:3723:4525
MF	16491	oxidoreductase activity	40 out of 530 genes, 7.5%	200 out of 5614 background genes, 3.6%	0.00053	0	CAGL0A02387g:CAGL0B02431g:IDP2:SDH2:CAGL0C03850g:CAGL0C04697g:CAGL0D00198g:IDP1:CAGL0D05280g:CAGL0E04356g:CAGL0E06424g:CAGL0F02607g:CAGL0F06919g:MET13:CAGL0F07777g:GDH2:CAGL0G06402g:YCP4:CAGL0H06699g:CAGL0I00418g:GCY1:GRE3:CAGL0I02530g:CAGL0I06831g:ADH2:CAGL0J08272g:CAGL0K00913g:GPD1:CAGL0K05687g:CAGL0K08844g:CAGL0K09702g:CYB2:CTA1:CAGL0K12100g:GLT1:FRDS1:YHB1:CAGL0M00374g:CAGL0M13013g:GND1	51536:50660:3954:4329:16639:3955:5506:51287:8270:16717:4768:16616:16653:50661:4352:3959:16491:4368:16040:4174:16620:4499:9055:42803:3824:19825:4497:4489:287:16209:16651:46872:4450:4096:15930:47952:4784:16705:10181:4109:4488:4616:5524:20037:51537
MF	5198	structural molecule activity	36 out of 530 genes, 6.8%	188 out of 5614 background genes, 3.3%	0.00466	0	CAGL0B01815g:CAGL0B03267g:CAGL0C01435g:CAGL0C04807g:CAGL0D04158g:CAGL0E00715g:CAGL0E03520g:CAGL0F02695g:CAGL0F04411g:CWP1.1:CAGL0G06776g:CAGL0G07931g:CAGL0G07953g:MNP1:CAGL0H03883g:CAGL0H04565g:HHT3:CAGL0I01804g:CAGL0I03036g:CAGL0J01463g:CAGL0J02838g:CAGL0J05258g:CAGL0J05478g:CAGL0J09856g:CAGL0K01243g:CAGL0K02717g:CAGL0K10912g:CAGL0K11044g:CAGL0K11462g:CAGL0K12056g:CAGL0L04070g:CAGL0L06732g:CAGL0…	3735:3677:19843:3676:5199:30527:46982:3723:4525
CC	71944	cell periphery	68 out of 530 genes, 12.8%	352 out of 5614 background genes, 6.3%	2.25e-07	0	PMA1:HXT4:CAGL0A01870g:HXT6/7:HXT4/6/7:CAGL0A02299g:CAGL0A04829g:AWP8:AWP9:HSP31:CAGL0C03916g:CAGL0D00198g:CAGL0D00418g:EGT2:CAGL0D04752g:MET15:YPS11:TPO1_2:GRE2(A):CAGL0E05610g:CAGL0E06424g:GLK1:PDH1:CAGL0F04213g:CAGL0F04895g:CWP1.1:CAGL0F07777g:CAGL0F08261g:SCW4:ARO8:CAGL0G01738g:TPO1_1:CAGL0G05357g:CAGL0G05566g:AWP12:ATP2:CAGL0H02101g:CAGL0H02585g:YCP4:FLR1:FLR2:CAGL0H10076g:GCY1:GRE3:CAGL0I01…	5737:5743:9986:786:5829:9277:5777:16020:5618:45261:15:16021:5576:62040:5886
CC	30312	external encapsulating structure	57 out of 530 genes, 10.8%	309 out of 5614 background genes, 5.5%	2.54e-05	0	PMA1:HXT4:CAGL0A01870g:CAGL0A02299g:CAGL0A04829g:AWP8:AWP9:HSP31:CAGL0C03916g:CAGL0D00198g:CAGL0D00418g:EGT2:CAGL0D04752g:MET15:YPS11:GRE2(A):CAGL0E05610g:CAGL0E06424g:GLK1:CAGL0F04213g:CAGL0F04895g:CWP1.1:CAGL0F07777g:CAGL0F08261g:SCW4:ARO8:CAGL0G01738g:CAGL0G05357g:AWP12:ATP2:CAGL0H02101g:CAGL0H02585g:YCP4:CAGL0H10076g:GCY1:GRE3:CAGL0I01496g:CAGL0I05874g:CAGL0J00451g:CAGL0J01463g:HSP12:CAGL0J06…	5737:5743:9986:786:5829:9277:5777:16020:5618:45261:15:5576:16021:5886:62040
CC	31012	extracellular matrix	54 out of 530 genes, 10.2%	288 out of 5614 background genes, 5.1%	3.08e-05	0	PMA1:HXT4:CAGL0A01870g:CAGL0A02299g:CAGL0A04829g:HSP31:CAGL0C03916g:CAGL0D00198g:CAGL0D00418g:EGT2:CAGL0D04752g:MET15:YPS11:GRE2(A):CAGL0E05610g:CAGL0E06424g:GLK1:CAGL0F04213g:CAGL0F04895g:CWP1.1:CAGL0F07777g:CAGL0F08261g:SCW4:ARO8:CAGL0G01738g:CAGL0G05357g:AWP12:ATP2:CAGL0H02101g:CAGL0H02585g:YCP4:CAGL0H10076g:GCY1:GRE3:CAGL0I01496g:CAGL0I05874g:CAGL0J00451g:HSP12:CAGL0J06050g:CAGL0J07568g:CAGL0…	5737:5743:9986:786:5829:9277:5777:16020:45261:15:5576:16021:5886:62040
CC	62039	biofilm matrix	54 out of 530 genes, 10.2%	288 out of 5614 background genes, 5.1%	3.08e-05	0	PMA1:HXT4:CAGL0A01870g:CAGL0A02299g:CAGL0A04829g:HSP31:CAGL0C03916g:CAGL0D00198g:CAGL0D00418g:EGT2:CAGL0D04752g:MET15:YPS11:GRE2(A):CAGL0E05610g:CAGL0E06424g:GLK1:CAGL0F04213g:CAGL0F04895g:CWP1.1:CAGL0F07777g:CAGL0F08261g:SCW4:ARO8:CAGL0G01738g:CAGL0G05357g:AWP12:ATP2:CAGL0H02101g:CAGL0H02585g:YCP4:CAGL0H10076g:GCY1:GRE3:CAGL0I01496g:CAGL0I05874g:CAGL0J00451g:HSP12:CAGL0J06050g:CAGL0J07568g:CAGL0…	5737:5743:9986:786:5829:9277:5777:16020:45261:15:5576:16021:5886:62040
CC	62040	fungal biofilm matrix	54 out of 530 genes, 10.2%	288 out of 5614 background genes, 5.1%	3.08e-05	0	PMA1:HXT4:CAGL0A01870g:CAGL0A02299g:CAGL0A04829g:HSP31:CAGL0C03916g:CAGL0D00198g:CAGL0D00418g:EGT2:CAGL0D04752g:MET15:YPS11:GRE2(A):CAGL0E05610g:CAGL0E06424g:GLK1:CAGL0F04213g:CAGL0F04895g:CWP1.1:CAGL0F07777g:CAGL0F08261g:SCW4:ARO8:CAGL0G01738g:CAGL0G05357g:AWP12:ATP2:CAGL0H02101g:CAGL0H02585g:YCP4:CAGL0H10076g:GCY1:GRE3:CAGL0I01496g:CAGL0I05874g:CAGL0J00451g:HSP12:CAGL0J06050g:CAGL0J07568g:CAGL0…	5737:5743:9986:786:5829:9277:5777:16020:45261:15:5576:16021:5886:62040
CC	5840	ribosome	29 out of 530 genes, 5.5%	128 out of 5614 background genes, 2.3%	0.0004	0	CAGL0B01815g:CAGL0B03267g:CAGL0C01435g:CAGL0D04158g:CAGL0E03520g:CAGL0F02695g:CAGL0F04411g:CAGL0G06776g:CAGL0G07931g:CAGL0G07953g:MNP1:CAGL0H03883g:CAGL0H04565g:CAGL0I01804g:CAGL0I03036g:CAGL0J02838g:CAGL0J05258g:CAGL0J05478g:CAGL0J09856g:CAGL0K01243g:CAGL0K02717g:CAGL0K11044g:CAGL0K12056g:CAGL0L04070g:CAGL0L06732g:CAGL0L10824g:CAGL0M01100g:CAGL0M08338g:CAGL0M09603g	5763:15934:5840:15935:5762
CC	5829	cytosol	18 out of 530 genes, 3.4%	77 out of 5614 background genes, 1.4%	0.01626	0.0029	TAL1:IDP2:HSP31:GRE2(A):GLK1:CAGL0F08261g:CAGL0G03883g:ATP2:CAGL0I05874g:CAGL0J00451g:HSP12:HSP60:CTA1:CAGL0L00649g:YHB1:LSP1:MSN4:GND1	5737:9986:5829:5777:5634:45261:15:5576:62040
CC	15934	large ribosomal subunit	8 out of 530 genes, 1.5%	20 out of 5614 background genes, 0.4%	0.02027	0.0025	CAGL0B01815g:CAGL0B03267g:CAGL0E03520g:CAGL0G06776g:CAGL0I03036g:CAGL0J09856g:CAGL0K01243g:CAGL0M08338g	15934:5840:5762
CC	5886	plasma membrane	12 out of 530 genes, 2.3%	42 out of 5614 background genes, 0.7%	0.026	0.0022	HXT6/7:HXT4/6/7:CAGL0D00418g:TPO1_2:PDH1:TPO1_1:CAGL0G05566g:FLR1:FLR2:TPO3:CAGL0L01551g:CYN1	62040:5886
CC	315	organellar large ribosomal subunit	4 out of 530 genes, 0.8%	5 out of 5614 background genes, 0.1%	0.02727	0.002	CAGL0B03267g:CAGL0E03520g:CAGL0J09856g:CAGL0K01243g	5762
CC	5762	mitochondrial large ribosomal subunit	4 out of 530 genes, 0.8%	5 out of 5614 background genes, 0.1%	0.02727	0.0018	CAGL0B03267g:CAGL0E03520g:CAGL0J09856g:CAGL0K01243g	5762
CC	16020	membrane	70 out of 530 genes, 13.2%	503 out of 5614 background genes, 9.0%	0.0302	0.0017	PMA1:HXT4:CAGL0A01870g:HXT6/7:HXT4/6/7:CAGL0A03212g:CAGL0B01012g:MUP1:CAGL0B04367g:CAGL0C00539g:CAGL0C01771g:CAGL0C01793g:CAGL0D00418g:CAGL0D00704g:CAGL0D03322g:CAGL0D04422g:CAGL0E01353g:TPO1_2:CAGL0E04004g:CAGL0E05632g:AUS1:PDH1:CAGL0F04213g:CAGL0F05401g:SDH4:CAGL0F08085g:TPO1_1:CAGL0G04631g:CAGL0G04807g:CAGL0G05566g:CAGL0G05632g:ATP2:CAGL0H00572g:CAGL0H01397g:CAGL0H02519g:FLR1:FLR2:CAGL0H10076g…	276:5829:5744:5789:5739:5783:45261:45277:16021:5886:5743:16020:5740:5637:5751:5576:5741:5784:62040
CC	44391	ribosomal subunit	11 out of 530 genes, 2.1%	37 out of 5614 background genes, 0.7%	0.03135	0.0015	CAGL0B01815g:CAGL0B03267g:CAGL0D04158g:CAGL0E03520g:CAGL0G06776g:CAGL0G07931g:CAGL0I03036g:CAGL0J09856g:CAGL0K01243g:CAGL0K02717g:CAGL0M08338g	5763:5840:5762:15934:15935
CC	5759	mitochondrial matrix	7 out of 530 genes, 1.3%	17 out of 5614 background genes, 0.3%	0.04034	0.0014	CAGL0A04697g:CAGL0B03267g:CAGL0D04158g:CAGL0E03520g:CAGL0E04356g:CAGL0J09856g:CAGL0K01243g	5763:5762:5759:9353
CC	5739	mitochondrion	27 out of 530 genes, 5.1%	151 out of 5614 background genes, 2.7%	0.05801	0.0027	CAGL0A04103g:CAGL0A04697g:CAGL0B03267g:CAGL0B04367g:CAGL0C01793g:CAGL0D01144g:CAGL0D04158g:CAGL0D05632g:CAGL0E03520g:CAGL0E04356g:CAGL0F04213g:SDH4:CAGL0F08085g:CAGL0I04796g:CAGL0I05918g:COX6:CAGL0J06380g:CAGL0J09262g:CAGL0J09856g:CAGL0K01243g:CAGL0K02409g:CAGL0K07315g:CAGL0K10120g:CAGL0K11341g:CAGL0L05280g:CAGL0L06160g:PUP1	5763:276:5744:5758:5739:5762:45277:5759:5743:61671:5740:16020:5751:9353:5741:62040
CC	313	organellar ribosome	5 out of 530 genes, 0.9%	10 out of 5614 background genes, 0.2%	0.09301	0.0138	CAGL0B03267g:CAGL0D04158g:CAGL0E03520g:CAGL0J09856g:CAGL0K01243g	5763:5762
CC	5761	mitochondrial ribosome	5 out of 530 genes, 0.9%	10 out of 5614 background genes, 0.2%	0.09301	0.0129	CAGL0B03267g:CAGL0D04158g:CAGL0E03520g:CAGL0J09856g:CAGL0K01243g	5763:5762

## Sheet: Data 2c
Data 2c	Differentially expressed genes in the ipi1R70H strain in response to micafungin exposure
(A) Upregulated genes (log2 Fold change >1, adjusted p-value <0.05)
GeneID	log2FoldChange	baseMean	padj	Gene Name	Description
CAGL0I00220g	4.68362	460.223	2.37934e-53	EPA23	Uncharacterized ORF; Predicted GPI-linked adhesin-like protein
CAGL0L05434g	3.73557	4239.55	1.21899e-32	NCA3	Uncharacterized ORF; Ortholog(s) have beta-glucosidase activity, role in fungal-type cell wall biogenesis, mitochondrion organization and fungal-type cell wall localization
CAGL0A04081g	3.56791	14214.6	1.21899e-32	NCW2	Uncharacterized ORF; Predicted GPI-linked cell wall protein
CAGL0E02409g	3.42013	1270.24	1.1339e-35	CSI2	Uncharacterized ORF; Ortholog(s) have cellular bud neck, fungal-type vacuole localization
CAGL0I06644g	3.37763	283.712	2.15137e-18	SPI1	Uncharacterized ORF; Putative GPI-linked cell wall protein
CAGL0L06776g	3.36503	1414.14	9.63515e-37	N/A	Uncharacterized ORF; Has domain(s) with predicted sequence-specific DNA binding, sequence-specific DNA binding transcription factor activity, zinc ion binding activity and role in regulation of transcription, DNA-dependent
CAGL0B02475g	3.34155	154.587	5.83281e-20	PHO84	Uncharacterized ORF; Ortholog(s) have inorganic phosphate transmembrane transporter activity, manganese ion transmembrane transporter activity and role in manganese ion transport, phosphate ion transport, polyphosphate metabolic process
CAGL0I10010g	3.13677	1243.32	7.15716e-24	BTN2	Uncharacterized ORF; Ortholog(s) have SNARE binding activity, role in amino acid transport, intracellular protein transport, regulation of pH, retrograde transport, endosome to Golgi and cytosol, late endosome, perinuclear region of cytoplasm localization
CAGL0J06028g	2.89773	40.8925	8.5981e-08	MEP2	Uncharacterized ORF; Ortholog(s) have high affinity secondary active ammonium transmembrane transporter activity, methylammonium transmembrane transporter activity
CAGL0E02145g	2.86753	615.481	1.21246e-22	SKM1	Uncharacterized ORF; Ortholog(s) have protein kinase activity, role in cytokinetic cell separation, negative regulation of gene expression, protein phosphorylation, sterol import and nucleus, plasma membrane localization
CAGL0G09449g	2.84639	14495.2	6.51097e-40	CRH1	Verified ORF; Putative glycoside hydrolase; predicted GPI-anchor
CAGL0C04741g	2.70755	920.903	1.3296e-12	SOD1	Verified ORF; Cytosolic copper-zinc superoxide dismutase
CAGL0M12320g	2.63486	4926.75	7.66307e-26	FLC2	Uncharacterized ORF; Ortholog(s) have FAD transmembrane transporter activity, role in FAD transport, fungal-type cell wall biogenesis, protein folding, transmembrane transport and endoplasmic reticulum localization
CAGL0M07766g	2.61657	636.975	1.42725e-23	N/A	Uncharacterized ORF; Putative protein; gene is upregulated in azole-resistant strain
CAGL0L02827g	2.59954	1745.79	1.04758e-19	PTP2	Uncharacterized ORF; Ortholog(s) have protein tyrosine phosphatase activity
CAGL0E02233g	2.58414	741.312	1.67778e-28	PCL1	Uncharacterized ORF; Ortholog(s) have cyclin-dependent protein kinase regulator activity
CAGL0H05621g	2.58155	2385.21	8.10858e-24	RLM1	Uncharacterized ORF; Putative transcription factor with a predicted role in cell wall integrity
CAGL0B00946g	2.55787	5019.9	1.00502e-24	RNQ1	Uncharacterized ORF; Ortholog(s) have cytosol localization
CAGL0K04433g	2.52662	3801.9	3.24336e-27	PEF1	Uncharacterized ORF; Ortholog(s) have calcium ion binding, zinc ion binding activity, role in axial cellular bud site selection, bipolar cellular bud site selection and cellular bud neck, cytoplasm, nucleus localization
CAGL0K00715g	2.45476	11024.3	2.61448e-24	RTA1	Uncharacterized ORF; Putative protein involved in 7-aminocholesterol resistance; gene is upregulated in azole-resistant strain
CAGL0D06050g	2.45114	1621.43	5.61606e-31	KCH1	Uncharacterized ORF; Ortholog(s) have fungal-type vacuole localization
CAGL0K04169g	2.36377	8627.25	8.06456e-21	KSS1	Uncharacterized ORF; Ortholog(s) have MAP kinase activity, transcription factor binding activity
CAGL0A03905g	2.36317	302.534	2.4295e-12	HMX1	Uncharacterized ORF; Ortholog(s) have heme oxygenase (decyclizing) activity and role in cellular iron ion homeostasis, heme catabolic process, response to carbon monoxide, response to oxidative stress
CAGL0D01265g	2.32064	221.887	2.80117e-10	MT-I	Verified ORF; Copper-binding metallothionein, involved in sequestration of metal ions; inducible by copper and silver; gene used for molecular typing of <i>C. glabrata</i> strain isolates
CAGL0M04191g	2.31782	4406.32	9.76712e-13	YPS1	Verified ORF; Yapsin family aspartic protease; predicted GPI-anchor; complements cell wall defect phenotypes of S. cerevisiae yps1 mutant; regulation of pH homeostasis under acid conditions; induced by high temperature, Slt1- and Crz1p-dependent
CAGL0B00715g	2.25909	453.844	2.26164e-19	N/A	Uncharacterized ORF
CAGL0J11935g	2.25862	139.391	1.28715e-10	AWP3b	De novo genome assembly
CAGL0G00858g	2.24831	1186.72	5.50636e-16	MID2	Uncharacterized ORF; Ortholog(s) have transmembrane signaling receptor activity
CAGL0M08096g	2.20052	6.3435	0.0189523	N/A	Uncharacterized ORF
CAGL0K11946g	2.19563	3221.24	7.44017e-16	N/A	Uncharacterized ORF
CAGL0M07381g	2.1582	7759.5	1.01375e-25	KTR6	Uncharacterized ORF; Ortholog(s) have mannosylphosphate transferase activity and role in fungal-type cell wall organization, protein N-linked glycosylation
CAGL0K04411g	2.15513	438.023	5.50636e-16	LST7	Uncharacterized ORF; Ortholog(s) have protein transporter activity, role in Golgi to plasma membrane transport, intracellular protein transport and cytosol, nucleus, vesicle coat localization
CAGL0J11176g	2.11629	1781.26	7.77598e-23	TDA7	Uncharacterized ORF; Putative adhesin-like protein
CAGL0J00539g	2.11472	10448.4	3.78507e-21	SLT2	Verified ORF; Mitogen-activated protein kinase with a role in cell wall integrity
CAGL0D01628g	2.0889	813.146	4.61299e-22	BRR1	Uncharacterized ORF; Ortholog(s) have RNA binding activity, role in spliceosomal complex assembly and small nuclear ribonucleoprotein complex localization
CAGL0J08437g	2.06685	2569.22	9.66527e-14	LPP1	Uncharacterized ORF; Ortholog(s) have phosphatidate phosphatase activity, role in phospholipid metabolic process and membrane localization
CAGL0C04763g	2.05457	1903.57	5.54444e-19	N/A	Uncharacterized ORF; Has domain(s) with predicted integral to membrane localization
CAGL0H04851g	2.04831	2350.12	1.5715e-12	PPZ1	Uncharacterized ORF; Ortholog(s) have 4-nitrophenylphosphatase activity, protein serine/threonine phosphatase activity and role in cellular protein localization, cellular sodium ion homeostasis, protein dephosphorylation
CAGL0H00440g	2.04703	2171.69	2.13898e-26	YJR124C	Uncharacterized ORF; Has domain(s) with predicted role in transmembrane transport and integral to membrane localization
CAGL0B00924g	2.0443	433.914	3.60525e-14	BIK1	Uncharacterized ORF; Ortholog(s) have microtubule binding, protein homodimerization activity
CAGL0J07700g	2.04011	516.962	1.59706e-15	CWC25	Uncharacterized ORF; Ortholog(s) have role in nuclear mRNA splicing, via spliceosome and U2-type spliceosomal complex localization
CAGL0K12892g	2.03791	5096.8	1.34732e-21	RGD2	Uncharacterized ORF; Ortholog(s) have Rho GTPase activator activity, role in establishment or maintenance of actin cytoskeleton polarity, small GTPase mediated signal transduction and cell cortex of cell tip, cellular bud neck, medial cortex localization
CAGL0M11462g	2.01848	5825.76	7.09541e-15	ICT1	Uncharacterized ORF; Ortholog(s) have lysophosphatidic acid acyltransferase activity and role in phosphatidic acid biosynthetic process
CAGL0F05329g	2.01133	13635.5	5.78549e-13	YDR210W	Uncharacterized ORF; Ortholog of <i>S. cerevisiae</i> : YDR210W
CAGL0D05434g	2.00932	1036.26	1.09021e-12	ROX1	Uncharacterized ORF; Has domain(s) with predicted DNA binding activity
CAGL0H01287g	1.99135	7172.82	2.71772e-14	SSD1	Uncharacterized ORF; Ortholog(s) have mRNA 5'-UTR binding, translation repressor activity, nucleic acid binding activity
CAGL0A04411g	1.98895	619.971	1.39139e-15	SKT5	Uncharacterized ORF; Ortholog(s) have enzyme activator activity
CAGL0L00561g	1.98369	200.382	1.13704e-09	SSO1	Uncharacterized ORF; Ortholog(s) have SNAP receptor activity, phosphatidic acid binding, phosphatidylinositol-3,4-bisphosphate binding, phosphatidylinositol-3,5-bisphosphate binding, phosphatidylinositol-4,5-bisphosphate binding activity
CAGL0D01276g	1.95534	3213.6	2.12277e-17	OPY2	Uncharacterized ORF; Ortholog(s) have role in cell cycle arrest in response to pheromone, osmosensory signaling pathway and fungal-type vacuole, integral to membrane, plasma membrane localization
CAGL0G08954g	1.93934	2556.46	2.98844e-11	TOS7	Uncharacterized ORF; Ortholog(s) have fungal-type vacuole, plasma membrane localization
CAGL0J11506g	1.92086	6921.01	3.10377e-22	CHS1	Uncharacterized ORF; Ortholog(s) have chitin synthase activity and role in ascospore wall assembly, ascospore wall chitin biosynthetic process, cytokinesis, completion of separation
CAGL0J03256g	1.90666	2330.52	5.91836e-20	PTP3	Uncharacterized ORF; Ortholog(s) have protein tyrosine phosphatase activity
CAGL0M05049g	1.90191	4775.87	1.21114e-12	DFG5	Uncharacterized ORF; Putative glycoside hydrolase; predicted GPI-anchor
CAGL0M07634g	1.87659	410.745	8.64438e-11	SOK2	Uncharacterized ORF; Ortholog(s) have sequence-specific DNA binding, sequence-specific DNA binding transcription factor activity
CAGL0A04037g	1.8757	1307.43	1.29719e-10	PWP1	Uncharacterized ORF; Ortholog(s) have role in rRNA processing and cytosol, nucleolus localization
CAGL0M06325g	1.87282	308.451	1.96619e-11	SMP1	Uncharacterized ORF; Ortholog(s) have DNA binding, bending, sequence-specific DNA binding activity, role in positive regulation of transcription from RNA polymerase II promoter in response to osmotic stress and cytoplasm, nucleus localization
CAGL0H05709g	1.86337	855.656	7.7483e-12	NOG1	Uncharacterized ORF; Ortholog(s) have role in cellular response to drug, rRNA processing, ribosomal large subunit biogenesis, ribosomal subunit export from nucleus and nucleolus, preribosome, large subunit precursor, spindle localization
CAGL0J11902g	1.8619	26.3796	0.000256063	AWP3a	De novo genome assembly
CAGL0D01606g	1.84747	698.228	3.60041e-16	YMC1	Uncharacterized ORF; Ortholog(s) have organic acid transmembrane transporter activity, role in mitochondrial transport and mitochondrion localization
CAGL0A03410g	1.84554	114.458	1.61905e-11	N/A	Uncharacterized ORF
CAGL0H08173g	1.8417	1304.93	1.42552e-14	CIN5	Putative bZIP transcription factor of the yAP-1 family; null mutant shows decreased resistance to fluconazole and increased growth on glycerol, consistent with a possible role in repressing mitochondrial function in glucose-poor conditions
CAGL0K08558g	1.82697	10387.5	3.3741e-08	GFA1	Uncharacterized ORF; Ortholog(s) have glutamine-fructose-6-phosphate transaminase (isomerizing) activity
CAGL0A04257g	1.82599	737.746	1.01779e-15	TOD6	Uncharacterized ORF; Ortholog(s) have sequence-specific DNA binding activity, role in regulation of transcription from RNA polymerase II promoter and Rpd3L complex, Rpd3L-Expanded complex, cytoplasm localization
CAGL0L01831g	1.81097	144.427	2.0341e-08	N/A	Unknown, inviable
CAGL0G02189g	1.80493	494.329	3.92957e-10	MTD1	Uncharacterized ORF; Putative methylenetetrahydrofolate dehydrogenase (NAD+); protein abundance increased in ace2 mutant cells
CAGL0M08206g	1.79681	2134.11	3.71142e-19	N/A	Uncharacterized ORF
CAGL0J04554g	1.77913	2257.13	1.11307e-19	N/A	Uncharacterized ORF; Has domain(s) with predicted pyridoxal phosphate binding, transaminase activity and role in biosynthetic process, cellular amino acid metabolic process
CAGL0B03619g	1.75465	1239.3	6.5498e-12	PRB1	Uncharacterized ORF; Ortholog(s) have serine-type endopeptidase activity
CAGL0B02755g	1.75153	3782.14	4.11417e-15	YLR361C-A	Uncharacterized ORF; Ortholog of <i>S. cerevisiae</i> : YLR361C-A
CAGL0C02211g	1.74318	407.102	9.43004e-14	UTR2	Verified ORF; Putative glycoside hydrolase of the Crh family; predicted GPI-anchor
CAGL0G04433g	1.73697	217.184	4.32015e-13	PRM10	Uncharacterized ORF; Ortholog(s) have endoplasmic reticulum localization
CAGL0K08272g	1.71772	1336.87	5.48674e-09	YSR3	Uncharacterized ORF; Ortholog(s) have sphingosine-1-phosphate phosphatase activity, role in phospholipid dephosphorylation, sphingolipid biosynthetic process and endoplasmic reticulum localization
CAGL0I05654g	1.71762	1219.22	5.0531e-12	URK1	Uncharacterized ORF; Ortholog(s) have uridine kinase activity, role in pyrimidine-containing compound salvage and cell division site, cytosol, nucleus, spindle pole body localization
CAGL0L12738g	1.712	233.807	5.14768e-07	SGF11	Uncharacterized ORF; Ortholog(s) have enzyme activator activity, role in histone deubiquitination, regulation of transcription from RNA polymerase II promoter and DUBm complex, SAGA complex localization
CAGL0C05115g	1.66607	276.753	4.48291e-11	ARG1	Uncharacterized ORF; Argininosuccinate synthetase
CAGL0M12496g	1.66237	471.12	1.2791e-06	VHR1	Transcriptional activator of genes involved in biotin metabolism; required for survival and proliferation in macrophages
CAGL0H06237g	1.64651	101.198	7.03898e-08	LDS1	Uncharacterized ORF; Ortholog of <i>S. cerevisiae</i> : LDS1
CAGL0M01452g	1.64143	190.482	3.6777e-09	PEP7	Uncharacterized ORF; Ortholog(s) have phosphatidylinositol-3-phosphate binding activity
CAGL0F04829g	1.64121	1025.65	4.19045e-10	PIN3	Uncharacterized ORF; Ortholog(s) have role in actin cytoskeleton organization and cytoplasm, nucleus localization
CAGL0M00748g	1.62623	802.52	2.01635e-13	ECM7	Verified ORF; Putative integral membrane protein required for high-affinity Ca2+ influx
CAGL0M06435g	1.62263	40.196	0.000155005	PCH2	Uncharacterized ORF; Ortholog(s) have role in meiotic recombination checkpoint, reciprocal meiotic recombination and nucleolus localization
CAGL0D04356g	1.60244	3942.93	2.55034e-09	GCV1	Uncharacterized ORF; Ortholog(s) have glycine dehydrogenase (decarboxylating) activity, role in glycine metabolic process, one-carbon metabolic process and mitochondrion localization
CAGL0K11682g	1.59973	474.633	9.89812e-08	CIS1	Uncharacterized ORF; Ortholog(s) have role in mitochondrion degradation, piecemeal microautophagy of nucleus and pre-autophagosomal structure localization
CAGL0K03663g	1.57978	5325.96	2.79876e-11	NCW1	Uncharacterized ORF; Ortholog(s) have endoplasmic reticulum localization
CAGL0M06809g	1.57142	635.581	5.35387e-08	TRM12	Uncharacterized ORF; Ortholog(s) have S-adenosylmethionine-dependent methyltransferase activity, transferase activity, transferring alkyl or aryl (other than methyl) groups activity and role in tRNA methylation, wybutosine biosynthetic process
CAGL0M00902g	1.56903	739.517	4.07608e-10	DIF1	Uncharacterized ORF; Ortholog(s) have cytoplasm localization
CAGL0B02739g	1.56692	1687.56	1.47607e-13	STE11	Verified ORF; Mitogen activated protein kinase involved in control of hypertonic stress response, filamentous growth, and virulence
CAGL0D01562g	1.55576	2753.27	1.48884e-08	FCY1	Uncharacterized ORF; Ortholog(s) have cytosine deaminase activity, role in cytidine metabolic process, cytosine metabolic process, pyrimidine-containing compound salvage and cytoplasm, nucleus localization
CAGL0G01540g	1.55457	807.502	2.063e-12	NCE103	Verified ORF; Beta carbonic anhydrase with a predicted role in non-classical protein export; upregulated in azole-resistant strain; enzyme activity increased by amines and amino acids; protein abundance decreased in ace2 cells
CAGL0I04444g	1.55195	2993	1.412e-11	ADE1	Uncharacterized ORF; Ortholog(s) have phosphoribosylaminoimidazolesuccinocarboxamide synthase activity, role in 'de novo' IMP biosynthetic process, adenine biosynthetic process and cytosol, nucleus localization
CAGL0H01419g	1.55174	1229.02	2.44031e-11	BFR2	Uncharacterized ORF; Ortholog(s) have role in rRNA processing and 90S preribosome, nucleolus localization
CAGL0F01485g	1.54944	174.549	1.08945e-05	TIR4	Verified ORF; Putative GPI-linked cell wall mannoprotein of the Srp1p/Tip1p family
CAGL0M06545g	1.5485	1781.96	2.23531e-10	SSH4	Uncharacterized ORF; Ortholog(s) have role in protein targeting to vacuole involved in ubiquitin-dependent protein catabolic process via the multivesicular body sorting pathway and fungal-type vacuole localization
CAGL0M02629g	1.54815	1792.42	1.1752e-12	ISU1	Uncharacterized ORF; Ortholog(s) have 2 iron, 2 sulfur cluster binding, ferrous iron binding activity, role in cellular iron ion homeostasis, iron-sulfur cluster assembly, tRNA wobble uridine modification and mitochondrial matrix localization
CAGL0K08360g	1.52824	818.707	9.4809e-09	TRM2	Uncharacterized ORF; Ortholog(s) have double-stranded DNA specific 5'-3' exodeoxyribonuclease activity, single-stranded DNA specific endodeoxyribonuclease activity, tRNA (m5U54) methyltransferase activity
CAGL0H06413g	1.51459	1243.27	9.7664e-11	CCW14	Verified ORF; Putative GPI-linked cell wall protein
CAGL0L08294g	1.50378	1255.57	5.99501e-13	AXL2	Uncharacterized ORF; Ortholog(s) have cellular bud neck localization
CAGL0I01430g	1.49569	8359.43	6.83883e-10	ANB1	Uncharacterized ORF; Ortholog(s) have cytosol, nucleolus localization
CAGL0G07249g	1.4844	503.59	6.3659e-07	YOX1	Uncharacterized ORF; Ortholog(s) have RNA polymerase II regulatory region sequence-specific DNA binding, RNA polymerase II transcription factor binding transcription factor activity involved in negative regulation of transcription activity
CAGL0G00286g	1.48081	5059.25	4.80613e-08	GAS1	Verified ORF; Putative glycoside hydrolase of the Gas/Phr family; predicted GPI-anchor
CAGL0A00935g	1.47526	403.808	4.02668e-09	CWC24	Uncharacterized ORF; Ortholog(s) have role in generation of catalytic spliceosome for first transesterification step, snoRNA splicing and U2-type spliceosomal complex localization
CAGL0J04972g	1.47449	44.4482	0.000127412	N/A	Uncharacterized ORF; Has domain(s) with predicted ATP binding, protein serine/threonine kinase activity and role in protein phosphorylation
CAGL0J02530g	1.46693	10.1741	0.0405839	N/A	Uncharacterized ORF; Putative adhesion protein; predicted GPI-anchor
CAGL0K02761g	1.45799	1559.64	6.92238e-07	HSE1	Uncharacterized ORF; Ortholog(s) have ubiquitin binding activity and role in ascospore-type prospore assembly, protein targeting to vacuole involved in ubiquitin-dependent protein catabolic process via the multivesicular body sorting pathway
CAGL0B03091g	1.44526	219.487	9.39091e-07	BUD8	Uncharacterized ORF; Ortholog(s) have role in cellular bud site selection, pseudohyphal growth and cellular bud tip, incipient cellular bud site, plasma membrane localization
CAGL0G04279g	1.44084	295.035	8.64376e-06	N/A	Uncharacterized ORF; Has domain(s) with predicted role in protein glycosylation
CAGL0E06292g	1.43919	50.8199	3.02984e-05	N/A	Uncharacterized ORF; Has domain(s) with predicted GTP binding activity and role in small GTPase mediated signal transduction
CAGL0G00220g	1.43176	2921.78	8.01207e-09	BGL2	Uncharacterized ORF; Ortholog(s) have 1,3-beta-glucanosyltransferase activity, glucan endo-1,3-beta-D-glucosidase activity and role in adhesion to host, fungal-type cell wall organization, growth of symbiont in host, pathogenesis
CAGL0M09471g	1.43164	18.9161	0.00638712	ATG16	Uncharacterized ORF; Ortholog(s) have Atg8 ligase activity, protein binding, bridging activity and role in C-terminal protein lipidation, CVT pathway, macroautophagy, mitochondrion degradation, piecemeal microautophagy of nucleus
CAGL0D01914g	1.42861	858.939	2.63442e-08	SED5	Uncharacterized ORF; Ortholog(s) have SNAP receptor activity, role in ER to Golgi vesicle-mediated transport, intra-Golgi vesicle-mediated transport, vesicle fusion with Golgi apparatus and SNARE complex, cis-Golgi network, integral to membrane localization
CAGL0K01859g	1.42737	560.302	2.79024e-06	NOP1	Uncharacterized ORF; Ortholog(s) have mRNA binding, methyltransferase activity, role in box C/D snoRNA 3'-end processing, rRNA methylation and 90S preribosome, box C/D snoRNP complex, nuclear chromosome, ribosome, small-subunit processome, spindle localization
CAGL0I04290g	1.42242	206.979	5.27741e-06	SUA5	Uncharacterized ORF; Ortholog(s) have single-stranded telomeric DNA binding activity, role in regulation of translational fidelity, telomere maintenance, threonylcarbamoyladenosine metabolic process and cytosol, nucleus localization
CAGL0M00132g	1.42224	192.941	1.56346e-08	EPA12	Uncharacterized ORF; Putative adhesin-like cell wall protein
CAGL0I06226g	1.41446	233.137	1.62371e-07	JJJ2	Uncharacterized ORF; Ortholog(s) have cytoplasm, nucleus localization
CAGL0B03597g	1.40132	809.234	7.21484e-07	PCM1	Uncharacterized ORF; Ortholog(s) have phosphoacetylglucosamine mutase activity, role in fungal-type cell wall chitin biosynthetic process and cytosol, nucleus localization
CAGL0E03245g	1.40065	650.885	1.06721e-05	NSR1	Uncharacterized ORF; Ortholog(s) have RNA binding, single-stranded DNA binding activity, role in single-species biofilm formation on inanimate substrate and mitochondrion, nucleus localization
CAGL0M06787g	1.39967	2952.28	2.85105e-05	KTR5	Uncharacterized ORF; Ortholog(s) have role in fungal-type cell wall organization and cytosol, nucleus localization
CAGL0L09174g	1.39708	1481.93	1.17026e-10	SAD1	Uncharacterized ORF; Ortholog(s) have role in nuclear mRNA splicing, via spliceosome and nucleus localization
CAGL0M06897g	1.39205	115.509	1.06322e-06	EFM6	Uncharacterized ORF; Ortholog(s) have cytoplasm localization
CAGL0E02321g	1.38717	1600.35	1.14342e-07	PLB3	Uncharacterized ORF; Putative phospholipase B; predicted GPI-anchor
CAGL0M07612g	1.38712	9753.31	1.42907e-09	FMS1	Uncharacterized ORF; Ortholog(s) have polyamine oxidase activity, role in pantothenate biosynthetic process, polyamine catabolic process and cytoplasm localization
CAGL0K03377g	1.38526	2114.63	4.48479e-07	LAF1	Uncharacterized ORF; Putative protein; gene is upregulated in azole-resistant strain
CAGL0I04466g	1.38356	1930.93	5.5106e-12	BUD14	Uncharacterized ORF; Ortholog(s) have protein phosphatase type 1 regulator activity
CAGL0E06644g	1.37947	1302.45	1.43006e-06	EPA1	Verified ORF; Sub-telomerically encoded adhesin with a role in cell adhesion; glycosylphosphatidylinositol-anchored cell wall protein (GPI-CWP); N-terminal ligand binding domain binds to ligands containing a terminal galactose residue
CAGL0M01628g	1.37637	1596.82	7.4352e-07	SAC7	Uncharacterized ORF; Ortholog(s) have role in actin filament reorganization involved in cell cycle
CAGL0E01023g	1.35668	224.15	6.17934e-09	CWC15	Uncharacterized ORF; Ortholog(s) have RNA binding activity, role in nuclear mRNA cis splicing, via spliceosome and U2-type spliceosomal complex localization
CAGL0E03025g	1.3557	2829.75	4.92504e-10	ECL1	Uncharacterized ORF; Ortholog of <i>S. cerevisiae</i> : ECL1
CAGL0D04180g	1.35286	688.879	3.60445e-05	UTP25	Uncharacterized ORF; Ortholog(s) have U3 snoRNA binding, rRNA binding activity, role in maturation of SSU-rRNA from tricistronic rRNA transcript (SSU-rRNA, 5.8S rRNA, LSU-rRNA) and nucleolus, small-subunit processome localization
CAGL0F07557g	1.34727	1173.27	9.32718e-10	YJU2	Uncharacterized ORF; Ortholog(s) have first spliceosomal transesterification activity, role in generation of catalytic spliceosome for first transesterification step and U2-type catalytic step 1 spliceosome localization
CAGL0C03960g	1.34668	47.3792	0.00488775	N/A	Uncharacterized ORF; Has domain(s) with predicted role in protein glycosylation
CAGL0M07403g	1.34331	1769.85	2.98014e-09	OAZ1	Uncharacterized ORF; Ortholog(s) have ornithine decarboxylase inhibitor activity and role in negative regulation of translational frameshifting, regulation of proteasomal protein catabolic process
CAGL0J02750g	1.34058	4135.12	1.55615e-09	CAJ1	Uncharacterized ORF; Has domain(s) with predicted heat shock protein binding, unfolded protein binding activity and role in protein folding
CAGL0I08591g	1.33882	1303.66	6.75395e-06	YER158C	Uncharacterized ORF; Ortholog of <i>S. cerevisiae</i> : YER158C
CAGL0D01474g	1.33553	838.385	1.84793e-05	N/A	Uncharacterized ORF
CAGL0E03069g	1.33255	2346.83	2.201e-06	ENP2	Uncharacterized ORF; Ortholog(s) have role in cellular response to drug, rRNA processing, ribosomal small subunit biogenesis and 90S preribosome, cytosol, nucleolus localization
CAGL0G03597g	1.32999	571.167	1.24943e-10	SHO1	Uncharacterized ORF; S. cerevisiae ortholog SHO1 has role in establishment of cell polarity, osmosensory signaling pathway, signal transduction involved in filamentous growth, cellular response to heat; osmosensitivity of CBS138 strain not seen in other strains
CAGL0B02211g	1.32793	2297.62	2.85399e-10	CCH1	Verified ORF; Putative calcium transporter; subunit of a plasma membrane gated channel involved in Ca2+ uptake; N-glycosylated integral membrane protein; required for viability upon prolonged fluconazole stress
CAGL0F06897g	1.32485	1968.16	2.78503e-11	NRE1	Uncharacterized ORF; Putative protein with alcohol dehydrogenase domain; gene is downregulated in azole-resistant strain
CAGL0G01320g	1.32238	866.585	2.38867e-08	MSG5	Uncharacterized ORF; Ortholog(s) have MAP kinase tyrosine/serine/threonine phosphatase activity, protein tyrosine phosphatase activity
CAGL0K08602g	1.32067	132.167	5.71226e-06	SLD2	Uncharacterized ORF; Ortholog(s) have DNA replication origin binding, DNA strand annealing activity
CAGL0J01265g	1.30316	651.577	9.35511e-06	UTP15	Uncharacterized ORF; Ortholog(s) have snoRNA binding activity and role in cellular response to drug, maturation of SSU-rRNA from tricistronic rRNA transcript (SSU-rRNA, 5.8S rRNA, LSU-rRNA), positive regulation of transcription from RNA polymerase I promoter
CAGL0L09647g	1.30315	1434.51	5.92495e-07	SQT1	Uncharacterized ORF; Ortholog(s) have role in ribosomal large subunit assembly and cytosolic ribosome, nucleus localization
CAGL0M08030g	1.29954	823.086	4.77798e-08	CPR7	Uncharacterized ORF; Ortholog(s) have peptidyl-prolyl cis-trans isomerase activity, unfolded protein binding activity, role in protein refolding, response to stress and cytosol localization
CAGL0F03311g	1.29831	229.023	2.21605e-06	KSP1	Uncharacterized ORF; Ortholog(s) have protein kinase activity and role in TOR signaling cascade, cellular protein localization, cellular response to drug, negative regulation of macroautophagy, protein phosphorylation, regulation of pseudohyphal growth
CAGL0M12430g	1.29568	1234.1	0.000110523	RHR2	Uncharacterized ORF; Putative DL-glycerol phosphatase
CAGL0M02607g	1.29483	925.222	6.18262e-09	GIP3	Uncharacterized ORF; Ortholog(s) have protein phosphatase 1 binding, protein phosphatase type 1 regulator activity and role in chromosome segregation, regulation of phosphoprotein phosphatase activity
CAGL0C04961g	1.2921	691.504	1.32424e-08	ECM27	Uncharacterized ORF; Ortholog(s) have role in fungal-type cell wall organization
CAGL0F01177g	1.28413	668.049	2.61611e-05	YOL036W	Uncharacterized ORF; Ortholog of <i>S. cerevisiae</i> : YOL036W
CAGL0M09669g	1.28209	959.841	6.09615e-05	RIM13	Uncharacterized ORF; Ortholog(s) have calcium-dependent cysteine-type endopeptidase activity
CAGL0H06919g	1.28187	4919.51	1.70745e-10	ERO1	Uncharacterized ORF; Ortholog(s) have protein disulfide oxidoreductase activity, thiol oxidase activity, role in protein thiol-disulfide exchange and endoplasmic reticulum membrane localization
CAGL0E00583g	1.28094	278.516	1.92785e-07	TRX3	Uncharacterized ORF; Ortholog(s) have disulfide oxidoreductase activity, role in cellular response to oxidative stress and mitochondrion localization
CAGL0I03608g	1.27769	3925.71	3.66723e-06	SAS10	Uncharacterized ORF; Ortholog(s) have role in cellular response to drug, endonucleolytic cleavage in 5'-ETS of tricistronic rRNA transcript (SSU-rRNA, 5.8S rRNA and LSU-rRNA), <a href="#GOsection">more</a>
CAGL0J09372g	1.27764	2550.69	3.26387e-06	HNT1	Uncharacterized ORF; Ortholog(s) have hydrolase activity, role in nucleotide metabolic process and cytoplasm, nucleus localization
CAGL0K00110g	1.27641	6006.55	9.1883e-08	AWP2	Verified ORF; Putative adhesin; predicted GPI-anchor
CAGL0H07381g	1.27641	299.011	1.19965e-07	CWC21	Uncharacterized ORF; Ortholog(s) have role in nuclear mRNA splicing, via spliceosome and U2-type spliceosomal complex localization
CAGL0L10670g	1.27464	822.521	3.33338e-08	ROT1	Uncharacterized ORF; Predicted GPI-linked cell wall protein
CAGL0J03872g	1.27384	856.966	1.70137e-07	KIN4	Uncharacterized ORF; Ortholog(s) have protein kinase activity, role in mitotic cell cycle spindle orientation checkpoint, protein phosphorylation and cell cortex, cellular bud neck, spindle pole body localization
CAGL0H09218g	1.27101	122.296	7.55188e-06	SDT1	Uncharacterized ORF; Ortholog(s) have nucleotidase activity and role in pyrimidine base metabolic process
CAGL0D01430g	1.26992	237.755	1.31717e-05	HOS1	Uncharacterized ORF; Ortholog(s) have protein deacetylase activity and role in peptidyl-lysine deacetylation, positive regulation of transcription from RNA polymerase II promoter
CAGL0M06963g	1.26976	18.4394	0.0167407	SOL2	Uncharacterized ORF; Ortholog(s) have role in tRNA export from nucleus and cytosol localization
CAGL0M08558g	1.26923	27.7317	0.00886932	N/A	Uncharacterized ORF
CAGL0K03509g	1.26859	8723.86	2.14367e-11	HFD1	Uncharacterized ORF; Putative mitochondrial fatty aldehyde dehydrogenase; gene is upregulated in azole-resistant strain
CAGL0K09130g	1.26405	1082.68	3.84895e-09	SRL1	Uncharacterized ORF; Putative adhesin-like protein
CAGL0M03839g	1.26216	861.623	7.55561e-07	BXI1	Uncharacterized ORF; Ortholog(s) have role in apoptotic process, calcium-mediated signaling, endoplasmic reticulum unfolded protein response and Golgi apparatus, endoplasmic reticulum, fungal-type vacuole membrane, mitochondrion localization
CAGL0G00814g	1.25993	5002.88	2.09657e-05	CHS5	Uncharacterized ORF; Ortholog(s) have role in Golgi to plasma membrane transport, ascospore wall assembly, cell wall chitin catabolic process, cellular bud site selection, conjugation with cellular fusion, regulation of transcription, DNA-dependent
CAGL0M11066g	1.25288	79.1896	0.00229117	CLB6	Uncharacterized ORF; Ortholog(s) have cyclin-dependent protein kinase regulator activity and role in G1/S transition of mitotic cell cycle, premeiotic DNA replication, regulation of S phase of mitotic cell cycle
CAGL0F07095g	1.25038	784.968	8.70673e-08	NAB2	Uncharacterized ORF; Ortholog(s) have poly(A) RNA binding activity, role in mRNA polyadenylation, poly(A)+ mRNA export from nucleus, regulation of mRNA stability and cytoplasm, nucleus localization
CAGL0L10648g	1.24686	525.737	1.80214e-07	CLN1	Uncharacterized ORF; Ortholog(s) have cytoplasm, nucleus localization
CAGL0K09614g	1.24499	931.524	1.29619e-07	KRE33	Uncharacterized ORF; Ortholog(s) have role in negative regulation of G0 to G1 transition, ribosomal small subunit biogenesis and 90S preribosome, nucleolus localization
CAGL0H05137g	1.24283	1795.79	5.34077e-07	ALD6	Uncharacterized ORF; Ortholog(s) have aldehyde dehydrogenase [NAD(P)+] activity, role in NADPH regeneration, acetate biosynthetic process, response to salt stress and cytosol, mitochondrion localization
CAGL0L02299g	1.23936	4210.98	1.81691e-06	VPS1	Uncharacterized ORF; Ortholog(s) have GTPase activity
CAGL0E02893g	1.2385	937.718	1.93101e-07	RRN6	Uncharacterized ORF; Ortholog(s) have RNA polymerase I regulatory region DNA binding, RNA polymerase I transcription factor binding activity and role in transcription of nuclear large rRNA transcript from RNA polymerase I promoter
CAGL0J09966g	1.23679	2634.63	2.46817e-05	YDJ1	Uncharacterized ORF; Putative mitochondrial and ER import protein; protein abundance increased in ace2 mutant cells
CAGL0D05324g	1.23571	1839.84	1.86925e-06	MTC4	Uncharacterized ORF; Ortholog(s) have cytoplasm localization
CAGL0M05159g	1.23302	1375	3.43723e-07	RNT1	Uncharacterized ORF; Ortholog(s) have RNA-directed RNA polymerase activity, ribonuclease III activity
CAGL0M04169g	1.23127	2788.98	1.46962e-06	KRE1	Uncharacterized ORF; Putative cell wall protein with similarity to S. cerevisiae Kre1p; predicted role in cell wall biogenesis and organization; predicted GPI-anchor
CAGL0K12804g	1.22882	1357.37	5.88907e-05	BUD20	Uncharacterized ORF; Ortholog(s) have role in cellular bud site selection and nucleolus localization
CAGL0H07557g	1.22783	2243.29	2.69554e-07	FZF1	Uncharacterized ORF; Ortholog(s) have RNA polymerase II core promoter proximal region sequence-specific DNA binding, <a href="#GOsection">more</a>
CAGL0I10670g	1.22678	170.117	3.57335e-05	NOC4	Uncharacterized ORF; Ortholog(s) have role in cellular response to drug, endonucleolytic cleavage in 5'-ETS of tricistronic rRNA transcript (SSU-rRNA, 5.8S rRNA and LSU-rRNA), <a href="#GOsection">more</a>
CAGL0H06853g	1.22359	2041.59	0.0020725	ADH6	Uncharacterized ORF; Putative NADP-dependent alcohol dehydrogenase VI; protein abundance increased in ace2 mutant cells
CAGL0A04499g	1.22193	76.3682	0.000242838	KTI11	Uncharacterized ORF; Ortholog(s) have electron carrier activity, iron ion binding, zinc ion binding activity, role in peptidyl-diphthamide biosynthetic process from peptidyl-histidine, tRNA wobble uridine modification and cytosol, nucleus localization
CAGL0L02849g	1.22023	1899.87	1.44344e-07	RET1	Uncharacterized ORF; Ortholog(s) have DNA-directed RNA polymerase activity, role in tRNA transcription from RNA polymerase III promoter and DNA-directed RNA polymerase III complex, cytosol localization
CAGL0G08734g	1.21977	382.139	4.92302e-05	RPL9B	Uncharacterized ORF; Ortholog(s) have structural constituent of ribosome activity, role in cytoplasmic translation and cytosolic large ribosomal subunit, nucleus localization
CAGL0G09537g	1.2193	157.258	1.32802e-05	IES4	Uncharacterized ORF; Putative adhesin-like protein
CAGL0K11528g	1.21798	1146.93	7.45202e-10	APN1	Uncharacterized ORF; Ortholog(s) have 3'-tyrosyl-DNA phosphodiesterase activity, DNA-(apurinic or apyrimidinic site) lyase activity, double-stranded DNA specific 3'-5' exodeoxyribonuclease activity and role in base-excision repair
CAGL0M11660g	1.21742	904.653	0.00345095	N/A	Uncharacterized ORF
CAGL0D05940g	1.2153	624.386	4.07753e-06	ERG1	Verified ORF; Squalene epoxidase with a role in ergosterol synthesis; involved in growth under conditions of low oxygen tension
CAGL0M03773g	1.21452	1160.45	4.8323e-08	TOS6	Uncharacterized ORF; Predicted GPI-linked adhesin-like protein
CAGL0E04488g	1.21442	475.828	1.21615e-06	AHC1	Uncharacterized ORF; Ortholog(s) have histone acetyltransferase activity, role in histone acetylation and Ada2/Gcn5/Ada3 transcription activator complex localization
CAGL0L02321g	1.2144	603.388	7.57936e-05	MET14	Uncharacterized ORF; Ortholog(s) have role in methionine biosynthetic process and cytosol, nucleus localization
CAGL0E01485g	1.21359	860.493	3.12699e-06	RTC1	Uncharacterized ORF; Ortholog(s) have Seh1-associated complex, cytosol, extrinsic to fungal-type vacuolar membrane, ribosome localization
CAGL0J03630g	1.2134	84.5207	5.42349e-05	BUD31	Uncharacterized ORF; Ortholog(s) have role in cellular bud site selection, nuclear mRNA splicing, via spliceosome and U2 snRNP, spliceosomal complex localization
CAGL0F00407g	1.21077	240.83	9.478e-05	LIA1	Uncharacterized ORF; Ortholog(s) have deoxyhypusine monooxygenase activity
CAGL0I04576g	1.21056	1807.85	2.26737e-05	APC11	Uncharacterized ORF; Ortholog(s) have ubiquitin-protein ligase activity, role in anaphase-promoting complex-dependent proteasomal ubiquitin-dependent protein catabolic process, protein ubiquitination and anaphase-promoting complex localization
CAGL0L07678g	1.20945	79.7257	0.000959443	DIM1	Uncharacterized ORF; Putative essential 18S rRNA dimethylase; gene is downregulated in azole-resistant strain
CAGL0E01507g	1.20858	677.039	1.4688e-06	BSC6	Uncharacterized ORF; Ortholog(s) have COPI-coated vesicle, clathrin-coated vesicle localization
CAGL0I03630g	1.20212	961.586	3.66723e-06	RPC53	Uncharacterized ORF; Ortholog(s) have DNA-directed RNA polymerase activity, role in tRNA transcription from RNA polymerase III promoter and DNA-directed RNA polymerase III complex, cytosol localization
CAGL0J02376g	1.20153	1059.71	0.000162142	FAF1	Uncharacterized ORF; Ortholog(s) have role in maturation of SSU-rRNA from tricistronic rRNA transcript (SSU-rRNA, 5.8S rRNA, LSU-rRNA) and cytoplasm, nucleolus localization
CAGL0L08547g	1.19916	4744.99	7.53465e-05	N/A	Unknown
CAGL0E05786g	1.19771	929.567	2.40734e-08	LEA1	Uncharacterized ORF; Ortholog(s) have role in nuclear mRNA splicing, via spliceosome and U2 snRNP, U2-type prespliceosome, cytoplasm localization
CAGL0K09460g	1.19659	1185.87	1.23838e-05	PNO1	Uncharacterized ORF; Putative nucleolar protein required for pre-rRNA processing; gene is downregulated in azole-resistant strain
CAGL0J07766g	1.18242	556.043	1.48355e-05	RPA49	Uncharacterized ORF; Ortholog(s) have role in regulation of cell size, transcription elongation from RNA polymerase I promoter, transcription of nuclear large rRNA transcript from RNA polymerase I promoter and DNA-directed RNA polymerase I complex localization
CAGL0D05456g	1.18216	19.6656	0.022501	N/A	Uncharacterized ORF
CAGL0L13068g	1.18159	269.716	0.000803697	EPT1	Uncharacterized ORF; Ortholog(s) have diacylglycerol cholinephosphotransferase activity, ethanolaminephosphotransferase activity, role in phosphatidylcholine biosynthetic process, phosphatidylethanolamine biosynthetic process and Golgi apparatus localization
CAGL0M05027g	1.18136	3190.26	4.81935e-07	BCH1	Uncharacterized ORF; Ortholog(s) have role in Golgi to plasma membrane transport, fungal-type cell wall chitin biosynthetic process and cell division site, clathrin-coated vesicle, cytosol, exomer complex, nucleus, ribosome localization
CAGL0L08382g	1.18013	28.4809	0.00707866	MAY24	Uncharacterized ORF; Ortholog of <i>S. cerevisiae</i> : YPR153W, <i>C. albicans SC5314</i> : orf19.351, <i>C. parapsilosis CDC317</i> : CPAR2_404520, <i>Candida tenuis NRRL Y-1498</i> : CANTEDRAFT_115795 and <i>Debaryomyces hansenii CBS767</i> : DEHA2B13838g
CAGL0M11484g	1.17748	3248.5	4.53878e-05	ARO1	Uncharacterized ORF; Ortholog(s) have 3-dehydroquinate dehydratase activity, 3-dehydroquinate synthase activity, 3-phosphoshikimate 1-carboxyvinyltransferase activity, shikimate 3-dehydrogenase (NADP+) activity, shikimate kinase activity
CAGL0L11066g	1.17234	4047.95	0.000394119	PLP2	Uncharacterized ORF; Ortholog(s) have G-protein beta/gamma-subunit complex binding, actin binding activity, role in positive regulation of transcription from RNA polymerase II promoter by pheromones, protein folding and cytoplasm localization
CAGL0G01991g	1.17215	891.146	2.60458e-05	NOB1	Uncharacterized ORF; Ortholog(s) have SSU rRNA binding, endoribonuclease activity and role in maturation of SSU-rRNA from tricistronic rRNA transcript (SSU-rRNA, 5.8S rRNA, LSU-rRNA), proteasome assembly
CAGL0J05412g	1.17016	1066.5	2.40157e-06	LSG1	Uncharacterized ORF; Ortholog(s) have role in ascospore formation, conjugation with cellular fusion, ribosomal large subunit assembly, ribosomal subunit export from nucleus and cytosol, mating projection tip localization
CAGL0K10362g	1.16941	376.222	2.3486e-07	ORT1	Uncharacterized ORF; Ortholog(s) have L-ornithine transmembrane transporter activity, role in arginine biosynthetic process, mitochondrial ornithine transport and mitochondrial envelope localization
CAGL0F06809g	1.16556	243.197	8.44525e-05	YVH1	Uncharacterized ORF; Ortholog(s) have protein tyrosine phosphatase activity
CAGL0M09757g	1.16493	1212.84	6.61276e-05	YLR287C	Uncharacterized ORF; Ortholog of <i>S. cerevisiae</i> : YLR287C
CAGL0I05676g	1.16119	130.327	0.000177229	PRP2	Uncharacterized ORF; Ortholog(s) have RNA-dependent ATPase activity, role in generation of catalytic spliceosome for first transesterification step and U2-type catalytic step 1 spliceosome localization
CAGL0J04466g	1.15999	12043.3	2.38707e-09	PUN1	Uncharacterized ORF; Ortholog(s) have role in fungal-type cell wall organization, protein oligomerization and Golgi apparatus, cell division site, cell tip, cellular bud, membrane raft, plasma membrane localization
CAGL0L03718g	1.15809	939.462	4.54928e-07	CMR2	Uncharacterized ORF has domain(s) with predicted catalytic activity, transcription factor binding activity, role in metabolic process and nucleus localization
CAGL0G00924g	1.15808	1690.54	0.000553753	SGD1	Uncharacterized ORF; Gene used for molecular typing of <i>C. glabrata</i> strain isolates
CAGL0M12573g	1.15732	370.866	0.000128172	SNP1	Uncharacterized ORF; Ortholog(s) have U1 snRNA binding, mRNA binding activity, role in nuclear mRNA splicing, via spliceosome and U1 snRNP, U2-type prespliceosome, commitment complex localization
CAGL0B00792g	1.15403	540.236	0.000328606	SRO9	Uncharacterized ORF; Ortholog(s) have RNA binding activity, role in cytoplasmic translation and polysome localization
CAGL0E01617g	1.15323	1522.89	1.35933e-05	ALR1	Uncharacterized ORF; Ortholog(s) have inorganic cation transmembrane transporter activity, role in magnesium ion transport and cytoplasm, plasma membrane localization
CAGL0H05511g	1.15224	1639.02	2.37175e-05	RPS9A	Uncharacterized ORF; Ortholog(s) have rRNA binding, structural constituent of ribosome activity and role in maturation of SSU-rRNA from tricistronic rRNA transcript (SSU-rRNA, 5.8S rRNA, LSU-rRNA)
CAGL0C04499g	1.1505	1173.09	3.55334e-06	PTC1	Uncharacterized ORF; Ortholog(s) have protein serine/threonine phosphatase activity
CAGL0G00990g	1.14785	5956.77	7.39407e-06	RPP0	Uncharacterized ORF; Acidic ribosomal protein L10
CAGL0E00759g	1.14716	1724.72	6.6641e-07	ARG82	Uncharacterized ORF; Ortholog(s) have inositol tetrakisphosphate 3-kinase activity, inositol tetrakisphosphate 6-kinase activity and inositol-1,3,4,5,6-pentakisphosphate kinase activity, <a href="#GOsection">more</a>
CAGL0K08338g	1.14711	20840.6	7.6392e-05	N/A	Uncharacterized ORF
CAGL0G00836g	1.1435	56.3816	0.00141422	N/A	Uncharacterized ORF
CAGL0M14047g	1.14292	262.173	4.33106e-05	ADH6	Uncharacterized ORF; Putative NADPH-dependent cinnamyl alcohol dehydrogenase; gene is upregulated in azole-resistant strain
CAGL0E02431g	1.13994	2594.77	8.11987e-08	TOP1	Uncharacterized ORF; Ortholog(s) have DNA topoisomerase type I activity
CAGL0H02057g	1.13931	1083.77	3.40582e-06	GAR1	Uncharacterized ORF; Ortholog(s) have box H/ACA snoRNA binding activity, role in cellular response to drug, snRNA pseudouridine synthesis and box H/ACA snoRNP complex localization
CAGL0D02090g	1.13833	1513.26	1.46095e-05	ASC1	Verified ORF; 40S small subunit ribosomal protein
CAGL0K13024g	1.13762	1583.94	1.18176e-06	AED1	Verified ORF; Adhesin-like protein required for adherence to endothelial cells; predicted GPI anchor; 6 tandem repeats; expressed more in stationary growth phase
CAGL0M04213g	1.13731	968.585	6.62208e-05	YLR126C	Uncharacterized ORF; Ortholog(s) have cytosol, nucleus localization
CAGL0M06347g	1.13531	1906.52	0.000487281	YPC1	Uncharacterized ORF; Ortholog(s) have phytoceramidase activity, sphingosine N-acyltransferase activity, role in ceramide biosynthetic process, ceramide catabolic process and endoplasmic reticulum localization
CAGL0H01243g	1.13236	867.528	1.45635e-07	HRQ1	Uncharacterized ORF; Ortholog(s) have nucleus localization
CAGL0J06732g	1.13112	1381.43	4.7357e-07	BUL2	Uncharacterized ORF; Ortholog(s) have ubiquitin-ubiquitin ligase activity, role in protein monoubiquitination, protein polyubiquitination and cytoplasm, ubiquitin ligase complex localization
CAGL0B03311g	1.13079	954.231	1.84817e-05	SAF1	Uncharacterized ORF; Ortholog(s) have ubiquitin-protein ligase activity, role in SCF-dependent proteasomal ubiquitin-dependent protein catabolic process and SCF ubiquitin ligase complex localization
CAGL0K00759g	1.13	2239.73	4.54723e-05	ZPR1	Uncharacterized ORF; Protein with similarity to M. musculus zinc finger protein Zpr1p
CAGL0J02816g	1.1291	749.377	3.0166e-06	TPA1	Uncharacterized ORF; Ortholog(s) have poly(A) RNA binding activity
CAGL0F08811g	1.12847	2080.61	1.0905e-05	SNU71	Uncharacterized ORF; Ortholog(s) have RNA binding activity, role in nuclear mRNA splicing, via spliceosome and U1 snRNP, U2-type prespliceosome localization
CAGL0A02321g	1.12743	165.698	6.76816e-06	HXT5	Uncharacterized ORF; Ortholog(s) have fructose transmembrane transporter activity, glucose transmembrane transporter activity, mannose transmembrane transporter activity and role in glucose transport
CAGL0K01903g	1.12693	356.337	8.22217e-07	YDL012C	Uncharacterized ORF; Ortholog(s) have plasma membrane localization
CAGL0K00671g	1.12589	1731.5	4.39246e-06	RPS14B	Uncharacterized ORF; Ortholog(s) have SSU rRNA binding activity, role in maturation of SSU-rRNA from tricistronic rRNA transcript (SSU-rRNA, 5.8S rRNA, LSU-rRNA), ribosomal small subunit assembly and small-subunit processome localization
CAGL0M03905g	1.12325	3154.13	1.84923e-06	KRI1	Uncharacterized ORF; Ortholog(s) have role in endonucleolytic cleavage in ITS1 to separate SSU-rRNA from 5.8S rRNA and LSU-rRNA from tricistronic rRNA transcript (SSU-rRNA, 5.8S rRNA, LSU-rRNA) and nucleolus localization
CAGL0F01089g	1.12184	842.364	2.52683e-05	SIL1	Uncharacterized ORF; Ortholog(s) have adenyl-nucleotide exchange factor activity, role in SRP-dependent cotranslational protein targeting to membrane, translocation and endoplasmic reticulum localization
CAGL0L08756g	1.11787	746.684	3.60397e-07	RRP12	Uncharacterized ORF; Ortholog(s) have 90S preribosome, nucleus, spindle pole body localization
CAGL0L13156g	1.11751	309.002	0.00176498	RFU1	Uncharacterized ORF; Ortholog(s) have enzyme inhibitor activity, role in regulation of ubiquitin homeostasis and endosome localization
CAGL0G04411g	1.11727	816.138	0.000791951	UTP10	Uncharacterized ORF; Ortholog(s) have snoRNA binding activity
CAGL0L05984g	1.11422	23.171	0.0269929	N/A	Uncharacterized ORF
CAGL0J11286g	1.11251	208	0.000347912	IPI3	Uncharacterized ORF; Ortholog(s) have role in cellular response to drug, rRNA processing, ribosomal large subunit assembly and cell division site, cytosol, nucleoplasm, spindle pole body localization
CAGL0J08712g	1.1102	391.824	6.58366e-06	FUN26	Uncharacterized ORF; Ortholog(s) have nicotinamide riboside transporter activity, role in nicotinamide riboside transport, transmembrane transport and fungal-type vacuole membrane localization
CAGL0L00605g	1.10882	3844.26	7.77445e-07	CNB1	Verified ORF; Regulatory subunit of calcineurin, calcium/calmodulin-dependent Ser/Thr-specific protein phosphatase; regulates stress-responding transcription factor Crz1p; involved in thermotolerance, response to ER stress, cell wall integrity, virulence
CAGL0L10890g	1.10766	499.822	0.000298155	YTM1	Uncharacterized ORF; Ortholog(s) have role in cellular response to biotic stimulus, cellular response to starvation and chromosome organization, <a href="#GOsection">more</a>
CAGL0I07249g	1.10527	1394.59	0.00661483	BAG7	Uncharacterized ORF; Putative GTPase-activating protein involved in cell wall and cytoskeleton homeostasis; gene is upregulated in azole-resistant strain
CAGL0I01188g	1.10249	1713.5	2.63511e-06	CDC12	Uncharacterized ORF; Ortholog(s) have 1-phosphatidylinositol binding, GTP binding, GTPase activity, protein complex scaffold activity
CAGL0I08547g	1.10145	246.917	3.43732e-05	MYG1	Uncharacterized ORF; Ortholog(s) have cytosol, nucleus localization
CAGL0E03289g	1.10125	1348.62	1.66503e-05	TIF4631	Uncharacterized ORF; Ortholog(s) have role in ribosomal large subunit biogenesis, stress granule assembly and cytoplasmic stress granule, eukaryotic translation initiation factor 4F complex, mitochondrion localization
CAGL0M12122g	1.10098	927.97	1.27355e-05	RBG1	Uncharacterized ORF; Ortholog(s) have role in cytoplasmic translation, filamentous growth and cytosol, nucleus, polysomal ribosome, polysome localization
CAGL0K02211g	1.10096	692.958	0.000619554	LCP5	Uncharacterized ORF; Ortholog(s) have RNA binding activity and nucleus localization
CAGL0L06842g	1.10094	662.713	8.52463e-05	THI3	Uncharacterized ORF; Ortholog(s) have carboxy-lyase activity
CAGL0L03047g	1.09349	641.353	0.000520183	DBP7	Uncharacterized ORF; Ortholog(s) have role in maturation of LSU-rRNA from tricistronic rRNA transcript (SSU-rRNA, 5.8S rRNA, LSU-rRNA) and nucleolus localization
CAGL0G09218g	1.08542	1045.48	1.70004e-06	RSA1	Uncharacterized ORF; Ortholog(s) have role in ribosomal large subunit assembly and nucleoplasm localization
CAGL0F00561g	1.08444	980.403	0.000384089	RPA12	Uncharacterized ORF; Ortholog(s) have DNA-directed RNA polymerase activity and role in termination of RNA polymerase I transcription, transcription of nuclear large rRNA transcript from RNA polymerase I promoter
CAGL0I01606g	1.08411	531.485	0.00146651	URB2	Uncharacterized ORF; Ortholog(s) have role in rRNA metabolic process, ribosome biogenesis and nucleolus localization
CAGL0C03245g	1.08331	205.586	9.50259e-05	ATG10	Uncharacterized ORF; Ortholog(s) have Atg12 ligase activity and role in CVT pathway, cellular protein modification process, macroautophagy, mitochondrion degradation, piecemeal microautophagy of nucleus
CAGL0J09328g	1.08214	1032.48	2.29714e-07	PCL2	Uncharacterized ORF; Ortholog(s) have cyclin-dependent protein kinase regulator activity
CAGL0L01705g	1.08174	2984.73	1.18793e-05	ANR2	Uncharacterized ORF; Ortholog(s) have lipid droplet localization
CAGL0B01397g	1.0817	455.452	0.000849636	NOP8	Uncharacterized ORF; Putative nucleolar protein required for ribosome biogenesis; gene is downregulated in azole-resistant strain
CAGL0M11704g	1.08013	2989.41	4.88558e-05	AHP1	Verified ORF; Putative thiol-specific peroxiredoxin; alkyl hydroperoxide reductase; protein differentially expressed in azole resistant strain; expression upregulated in biofilm vs planktonic cell culture; protein abundance decreased in ace2 mutant cells
CAGL0G04719g	1.07857	982.566	3.8938e-06	INP52	Uncharacterized ORF; Ortholog(s) have phosphatidylinositol-3,5-bisphosphate 5-phosphatase activity, phosphatidylinositol-3-phosphatase activity, phosphatidylinositol-4,5-bisphosphate 5-phosphatase activity, phosphatidylinositol-4-phosphate phosphatase activity
CAGL0J10978g	1.07823	1558.24	9.44336e-06	GIC2	Uncharacterized ORF; Ortholog(s) have Rho GTPase activator activity, Rho GTPase binding, phosphatidylinositol-4,5-bisphosphate binding activity and role in establishment of cell polarity, regulation of exit from mitosis
CAGL0D03256g	1.07673	350.064	1.08171e-06	YEH2	Uncharacterized ORF; Ortholog(s) have sterol esterase activity, role in cell wall mannoprotein biosynthetic process, sterol metabolic process and integral to membrane, plasma membrane localization
CAGL0L11836g	1.07672	1369.31	1.99009e-06	BCK2	Uncharacterized ORF; Ortholog(s) have role in G1/S transition of mitotic cell cycle, positive regulation of gene expression, regulation of cell cycle and cytoplasm, nucleus localization
CAGL0K04741g	1.07567	6128.56	3.73041e-05	SSB2	Uncharacterized ORF; Heat shock protein of HSP70 family
CAGL0D02838g	1.07393	305.925	0.000404981	RIX7	Uncharacterized ORF; Ortholog(s) have role in hyphal growth, ribosomal large subunit biogenesis, ribosomal large subunit export from nucleus, single-species biofilm formation on inanimate substrate
CAGL0M13805g	1.07349	981.169	3.86439e-06	SCW10	Uncharacterized ORF; 65 kDa mannoprotein
CAGL0F00275g	1.07051	12166.2	0.00148421	CDC11	Uncharacterized ORF; Ortholog(s) have 1-phosphatidylinositol binding, GTP binding, structural molecule activity
CAGL0J01485g	1.06916	658.979	8.10224e-05	OTU2	Uncharacterized ORF; Ortholog(s) have ubiquitin-specific protease activity, role in protein deubiquitination and cytosol, ribosome localization
CAGL0M04411g	1.06735	51.3151	0.00579364	RKM5	Uncharacterized ORF; Ortholog(s) have S-adenosylmethionine-dependent methyltransferase activity and role in protein methylation
CAGL0G08294g	1.06647	576.659	7.50561e-06	GPN3	Uncharacterized ORF; Ortholog(s) have cytosol, nucleus localization
CAGL0I02354g	1.06547	1134.63	1.32802e-05	DBP8	Uncharacterized ORF; Ortholog(s) have ATP-dependent RNA helicase activity
CAGL0F04851g	1.06513	803.204	0.000170611	NCA2	Uncharacterized ORF; Ortholog(s) have role in aerobic respiration, mRNA metabolic process and mitochondrial outer membrane localization
CAGL0K07161g	1.06408	423.326	6.83209e-07	N/A	Uncharacterized ORF; Has domain(s) with predicted catalytic activity and role in metabolic process
CAGL0I03344g	1.06188	534.812	9.45525e-06	NRP1	Uncharacterized ORF; Ortholog(s) have cytoplasmic stress granule, nucleolus localization
CAGL0J03916g	1.06139	1433.28	2.94584e-06	HES1	Uncharacterized ORF; Ortholog(s) have oxysterol binding, sterol transporter activity and role in endocytosis, exocytosis, maintenance of cell polarity, sterol transport
CAGL0J00473g	1.05971	2918.89	0.00167897	CIC1	Uncharacterized ORF; Ortholog(s) have protein binding, bridging activity, role in protein catabolic process, ribosomal large subunit biogenesis and nucleolus, preribosome, large subunit precursor, proteasome complex localization
CAGL0H02937g	1.05931	1506.08	1.62821e-05	UTP18	Uncharacterized ORF; Ortholog(s) have role in endonucleolytic cleavage in 5'-ETS of tricistronic rRNA transcript (SSU-rRNA, 5.8S rRNA and LSU-rRNA), <a href="#GOsection">more</a>
CAGL0M03487g	1.05814	248.024	0.00122783	RPC34	Uncharacterized ORF; Ortholog(s) have DNA-directed RNA polymerase activity, role in tRNA transcription from RNA polymerase III promoter and DNA-directed RNA polymerase III complex, cytosol, mitochondrion localization
CAGL0C01639g	1.0573	1120.03	0.000504886	ENP1	Uncharacterized ORF; Ortholog(s) have snoRNA binding activity
CAGL0M04125g	1.05596	1981.74	8.05366e-06	YNL320W	Uncharacterized ORF; Ortholog of <i>S. cerevisiae</i> : YNL320W
CAGL0D05302g	1.05577	911.187	3.06522e-06	RIB5	Uncharacterized ORF; Ortholog(s) have riboflavin synthase activity, role in riboflavin biosynthetic process and cytosol, nucleus, soluble fraction localization
CAGL0M05687g	1.05495	446.123	9.70463e-05	NPY1	Uncharacterized ORF; Ortholog(s) have NAD+ diphosphatase activity, role in NADH metabolic process and cytosol, nucleus, peroxisome localization
CAGL0L12782g	1.05387	684.229	0.000415743	DIG1	Uncharacterized ORF; Ortholog(s) have DNA binding, transcription factor binding activity
CAGL0L01111g	1.05357	1270.59	2.46003e-06	SFA1	Uncharacterized ORF; Ortholog(s) have S-(hydroxymethyl)glutathione dehydrogenase activity, alcohol dehydrogenase (NAD) activity, hydroxymethylfurfural reductase (NADH) activity
CAGL0H01683g	1.0518	1172.62	0.000834565	URC2	Uncharacterized ORF; Ortholog(s) have sequence-specific DNA binding activity and cytoplasm, nucleus localization
CAGL0K04037g	1.04936	2645.59	7.58597e-05	GSC2	Verified ORF; Putative 1,3-beta-glucan synthase component; "hot spot" mutations in FKS2 confer resistance to echinchandins
CAGL0G07975g	1.04921	1735.79	0.00368826	DBP6	Uncharacterized ORF; Ortholog(s) have role in maturation of 5.8S rRNA from tricistronic rRNA transcript (SSU-rRNA, 5.8S rRNA, LSU-rRNA), maturation of LSU-rRNA from tricistronic rRNA transcript (SSU-rRNA, 5.8S rRNA, LSU-rRNA)
CAGL0J04576g	1.04803	322.521	0.000174241	DPH2	Uncharacterized ORF; Ortholog(s) have role in peptidyl-diphthamide biosynthetic process from peptidyl-histidine and cytosol localization
CAGL0G02409g	1.04753	360.617	0.000417564	SRP40	Uncharacterized ORF; Ortholog(s) have nucleolus localization
CAGL0J03388g	1.04406	153.627	0.000588045	AIR2	Uncharacterized ORF; Ortholog(s) have RNA binding, polynucleotide adenylyltransferase activity, protein binding, bridging activity
CAGL0M04565g	1.04256	343.575	2.84281e-06	ACF2	Uncharacterized ORF; Ortholog(s) have glucan endo-1,3-beta-D-glucosidase activity, role in actin cytoskeleton organization and ascus epiplasm, intracellular localization
CAGL0H08261g	1.03881	514.604	0.00058914	YOR019W	Uncharacterized ORF; Ortholog(s) have role in autophagy of mitochondrion
CAGL0J01848g	1.03639	956.39	0.00176049	RPA135	Uncharacterized ORF; Ortholog(s) have DNA-directed RNA polymerase activity, role in transcription of nuclear large rRNA transcript from RNA polymerase I promoter and DNA-directed RNA polymerase I complex localization
CAGL0F03927g	1.03525	977.777	0.000182781	GUA1	Uncharacterized ORF; Ortholog(s) have GMP synthase (glutamine-hydrolyzing) activity, role in GMP biosynthetic process and cytosol, soluble fraction localization
CAGL0E03784g	1.03322	269.604	0.000216746	OCA5	Uncharacterized ORF; Ortholog(s) have cytoplasm localization
CAGL0M06919g	1.0319	370.607	0.000139153	FAP1	Uncharacterized ORF; Ortholog(s) have Golgi apparatus, cytosol localization
CAGL0E00869g	1.0307	3079.07	0.000251283	STM1	Uncharacterized ORF; Ortholog(s) have telomeric DNA binding, triplex DNA binding activity and role in TOR signaling cascade, anti-apoptosis, regulation of translational initiation in response to stress, telomere maintenance, translational elongation
CAGL0A01089g	1.03068	125.863	0.00159205	PBI1	Uncharacterized ORF has domain(s) with predicted alcohol O-acetyltransferase activity and role in alcohol metabolic process
CAGL0A02772g	1.03032	292.414	0.000369895	CDC40	Uncharacterized ORF; Ortholog(s) have second spliceosomal transesterification activity
CAGL0L11110g	1.03028	3591.6	0.000324081	CMP2	Verified ORF; Catalytic subunit of calcineurin, calcium/calmodulin-dependent Ser/Thr-specific protein phosphatase; regulates stress-responding transcription factor Crz1p; involved in thermotolerance, response to ER stress, cell wall integrity, virulence
CAGL0L06798g	1.02893	2602.55	0.000521105	MDH3	Uncharacterized ORF; Ortholog(s) have L-malate dehydrogenase activity, mRNA binding activity and peroxisome localization
CAGL0L11638g	1.027	1761.23	0.000185346	ESF1	Uncharacterized ORF; Ortholog(s) have RNA binding activity, role in rRNA processing and nucleolus localization
CAGL0K00781g	1.02511	1409.75	0.00033357	YGR210C	Uncharacterized ORF has domain(s) with predicted GTP binding activity
CAGL0I09350g	1.02495	3277.54	0.00171937	REI1	Uncharacterized ORF; Ortholog(s) have sequence-specific DNA binding activity and role in budding cell bud growth, mitotic cell cycle, nucleocytoplasmic transport, ribosomal large subunit biogenesis
CAGL0E05500g	1.0248	1169.95	0.000323253	RPA190	Uncharacterized ORF; Ortholog(s) have DNA-directed RNA polymerase activity
CAGL0D03674g	1.02132	1825.43	6.39767e-05	NEW1	Uncharacterized ORF; Ortholog(s) have ATP binding, ATPase activity, role in poly(A)+ mRNA export from nucleus, ribosomal small subunit biogenesis and cytosol, mitochondrion, plasma membrane, polysome localization
CAGL0J10296g	1.02047	1430.94	0.00016209	APJ1	Uncharacterized ORF; Ortholog(s) have unfolded protein binding activity and mitochondrion, nucleus localization
CAGL0E05874g	1.01945	1123.87	8.4767e-05	BMS1	Uncharacterized ORF; Ortholog(s) have GTP binding, GTPase activity, U3 snoRNA binding activity, role in cellular response to drug, rRNA processing, ribosome assembly and 90S preribosome, mitochondrion, nucleolus, spindle localization
CAGL0M06941g	1.01791	432.028	6.64213e-05	RCM1	Uncharacterized ORF; Ortholog(s) have nucleolus localization
CAGL0J03652g	1.01612	2325.05	1.02198e-05	CDC60	Uncharacterized ORF; Ortholog(s) have leucine-tRNA ligase activity, role in DNA-dependent DNA replication initiation, leucyl-tRNA aminoacylation and cytosol localization
CAGL0B04257g	1.016	5571.57	0.000497274	RPL4B	Uncharacterized ORF; Ortholog(s) have cell surface, cytosol, membrane fraction localization
CAGL0B04389g	1.01465	1807.74	0.000527952	CHS3	Verified ORF; Putative class IV chitin synthase; mutants display a significantly thickened cell wall mannoprotein layer; mutants are delayed in cell wall formation during protoplast regeneration
CAGL0D02948g	1.01434	13270.8	0.000244202	KAR2	Uncharacterized ORF; Protein with a predicted role in nuclear fusion
CAGL0I05830g	1.01109	2181.19	0.000104138	VPS27	Uncharacterized ORF; Ortholog(s) have phosphatidylinositol-3-phosphate binding, ubiquitin binding activity
CAGL0E05258g	1.01091	532.121	6.30401e-06	SNC2	Uncharacterized ORF; Ortholog(s) have SNAP receptor activity, role in Golgi to plasma membrane transport, endocytosis, exocytosis, vesicle fusion and SNARE complex, endosome, trans-Golgi network, transport vesicle membrane localization
CAGL0H07051g	1.00876	420.22	0.000216269	ASP1	Uncharacterized ORF; Ortholog(s) have role in asparagine catabolic process and Golgi apparatus localization
CAGL0L04950g	1.0087	800.589	0.00155946	ERB1	Uncharacterized ORF; Ortholog(s) have role in cellular response to drug, rRNA processing, ribosomal large subunit biogenesis and PeBoW complex, preribosome, large subunit precursor localization
CAGL0H02299g	1.00737	206.19	2.80676e-05	YMR265C	Uncharacterized ORF; Ortholog of <i>S. cerevisiae</i> : YMR265C
CAGL0F01045g	1.00686	3665.86	0.000332333	RPS15	Uncharacterized ORF; Ortholog(s) have role in rRNA export from nucleus and nucleolus localization
CAGL0J06088g	1.00665	551.128	1.36694e-05	YNL162W-A	Uncharacterized ORF; Ortholog of <i>S. cerevisiae</i> : YNL162W-A
CAGL0F07799g	1.00466	2111.28	8.71049e-06	EAR1	Uncharacterized ORF; Ortholog(s) have role in protein targeting to vacuole involved in ubiquitin-dependent protein catabolic process via the multivesicular body sorting pathway and endosome localization
CAGL0M06831g	1.00447	2929.93	7.11348e-06	CRZ1	Uncharacterized ORF; Transcription factor; downstream component of the calcineurin signaling pathway
CAGL0D03410g	1.0042	481.656	0.00106622	RRN7	Uncharacterized ORF; Ortholog(s) have RNA polymerase I CORE element sequence-specific DNA binding, TBP-class protein binding activity and role in transcription of nuclear large rRNA transcript from RNA polymerase I promoter
CAGL0K01551g	1.00395	793.896	5.17025e-05	DBP10	Uncharacterized ORF; Ortholog(s) have role in maturation of 5.8S rRNA from tricistronic rRNA transcript (SSU-rRNA, 5.8S rRNA, LSU-rRNA), maturation of LSU-rRNA from tricistronic rRNA transcript (SSU-rRNA, 5.8S rRNA, LSU-rRNA)
CAGL0K00957g	1.00224	2240.53	8.70931e-06	ELP2	Uncharacterized ORF; Ortholog(s) have role in protein urmylation, regulation of transcription from RNA polymerase II promoter, tRNA wobble uridine modification and Elongator holoenzyme complex, cytosol, nucleus localization
CAGL0G01364g	1.0022	2486.85	1.32802e-05	GRS1	Uncharacterized ORF; Ortholog(s) have glycine-tRNA ligase activity, role in mitochondrial glycyl-tRNA aminoacylation, transcription termination, DNA-dependent and cytosol, mitochondrion localization
CAGL0K09284g	1.00023	1231.19	0.000139059	PWP2	Uncharacterized ORF; Ortholog(s) have snoRNA binding activity
CAGL0E02585g	1.00018	614.049	2.11441e-05	RRP6	Uncharacterized ORF; Ortholog(s) have 3'-5'-exoribonuclease activity
(B) Downregulated genes (log2 Fold change <-1, adjusted p-value <0.05)
GeneID	log2FoldChange	baseMean	padj	Gene Name	Description1
CAGL0K07337g	-5.5678	1457.52	3.2091e-58	N/A	Uncharacterized ORF
CAGL0M13266g	-5.19826	240.349	1.3184e-34	N/A	ORF, Uncharacterized
CAGL0M01166g	-5.00672	7190.6	3.35428e-09	THI4	Uncharacterized ORF; Ortholog(s) have ferrous iron binding activity, role in mitochondrial genome maintenance, thiamine biosynthetic process, thiazole biosynthetic process and cytosol, nucleus localization
CAGL0B01875g	-4.92529	3425.9	2.53846e-122	COX26	Uncharacterized ORF; Ortholog(s) have mitochondrial inner membrane, mitochondrial respirasome, mitochondrial respiratory chain complex IV localization
CAGL0J00451g	-4.89354	5791.7	9.11307e-81	TDH3	Verified ORF; Putative glyceraldehyde-3-phosphate dehydrogenase; protein differentially expressed in azole resistant strain; expression downregulated in biofilm vs planktonic cell culture
CAGL0G05632g	-4.77615	3158.93	1.66392e-13	YDL218W	Uncharacterized ORF
CAGL0F04631g	-4.47515	4312.3	3.98459e-60	MOH1	Uncharacterized ORF; Ortholog of <i>S. cerevisiae</i> : MOH1, <i>C. albicans SC5314</i> : orf19.3369/MOH1, <i>C. parapsilosis CDC317</i> : CPAR2_403470 and <i>Candida tenuis NRRL Y-1498</i> : CANTEDRAFT_113777
CAGL0J03080g	-4.41418	2640.51	4.0535e-43	RGI1	Uncharacterized ORF; Ortholog(s) have role in energy reserve metabolic process and cell periphery, cytoplasm, membrane fraction, nucleus localization
CAGL0J04202g	-4.21255	3359.4	4.04405e-34	HSP12	Verified ORF; Heat shock protein; gene is upregulated in azole-resistant strain; expression upregulated in biofilm vs planktonic cell culture
CAGL0I00550g	-4.20481	960.865	4.26865e-80	YLR297W	Uncharacterized ORF; Ortholog of <i>S. cerevisiae</i> : YLR297W
CAGL0F08261g	-4.20405	1762.72	4.1678e-34	ENO1	Uncharacterized ORF; Ortholog(s) have high molecular weight kininogen binding, phosphopyruvate hydratase activity
CAGL0K04301g	-4.19798	1896.37	2.95285e-87	FMP48	Uncharacterized ORF; Putative mitochondrial Ser/Thr protein kinase; gene is upregulated in azole-resistant strain
CAGL0H04037g	-4.08162	1184.53	3.64786e-60	GAC1	Uncharacterized ORF; Ortholog(s) have heat shock protein binding activity, role in glycogen metabolic process, meiosis, mitotic cell cycle spindle assembly checkpoint, response to heat and protein phosphatase type 1 complex localization
CAGL0E06094g	-4.03213	3.07929	0.0201716	N/A	Uncharacterized ORF
CAGL0K07568g	-3.80222	367.071	1.30496e-07	PMU3	Verified ORF; Protein with a phosphomutase-like domain
CAGL0H02695g	-3.75578	2324.6	3.34376e-52	GLG1	Uncharacterized ORF; Ortholog(s) have glycogenin glucosyltransferase activity and role in glycogen biosynthetic process
CAGL0E01353g	-3.7505	6809.82	5.95982e-62	N/A	Uncharacterized ORF; Putative high-affinity zinc transporter; gene is downregulated in azole-resistant strain
CAGL0G05269g	-3.72971	1834.2	1.61312e-34	FMP16	Uncharacterized ORF; Putative mitochondrial protein; gene is downregulated in azole-resistant strain
CAGL0H10076g	-3.65659	3216.82	5.13391e-47	YRO2	Uncharacterized ORF; Ortholog(s) have cellular bud, mitochondrion localization
CAGL0L07766g	-3.54218	115.31	1.34166e-05	ADY2	Uncharacterized ORF; Ortholog(s) have acetate transmembrane transporter activity, ammonium transmembrane transporter activity and role in acetate transport, ammonium transport, nitrogen utilization, transmembrane transport
CAGL0H00704g	-3.45468	11499.9	5.9246e-48	ICY2	Uncharacterized ORF; Ortholog(s) have role in mitochondrion degradation
CAGL0M14113g	-3.41313	34.958	4.00559e-11	TNR2	Verified ORF; High-affinity transporter of NAD+ precursors; strongly induced under niacin-limiting conditions
CAGL0G09603g	-3.34533	782.315	3.59098e-50	YOR186W	Uncharacterized ORF; Putative protein; gene is upregulated in azole-resistant strain
CAGL0D04686g	-3.34425	211.391	2.8483e-05	AXL1	Uncharacterized ORF; Ortholog(s) have metalloendopeptidase activity, role in axial cellular bud site selection, peptide pheromone maturation and cellular bud neck, mating projection tip, peripheral to membrane of membrane fraction localization
CAGL0L06094g	-3.34167	3286.87	4.09536e-36	STR3	Uncharacterized ORF; Putative cystathionine beta-lyase; gene is upregulated in azole-resistant strain
CAGL0H06039g	-3.34048	22.1737	5.53351e-07	FLR2	Uncharacterized ORF
CAGL0A03102g	-3.27101	678.064	2.03719e-31	ARO10	Uncharacterized ORF; Ortholog(s) have phenylpyruvate decarboxylase activity
CAGL0D04422g	-3.26687	3256.07	5.99344e-27	N/A	Uncharacterized ORF; S pombe ortholog(s) have fluoride transmembrane transporter activity and role in cellular detoxification of fluoride, fluoride export across plasma membrane
CAGL0A02002g	-3.22963	1844.12	6.62502e-24	YOL024W	Uncharacterized ORF; Ortholog of <i>S. cerevisiae</i> : YOL024W
CAGL0M00154g	-3.20937	1779.8	1.72968e-58	CYN1	Verified ORF; Plasma membrane high affinity cystine specific transporter; present only in pathogenic yeasts; confers the ability to utilize cystine as a sulfur source
CAGL0J09042g	-3.18009	3.30476	0.047515	NUS1	Uncharacterized ORF; Ortholog(s) have role in protein glycosylation and endoplasmic reticulum, lipid particle, nuclear envelope localization
CAGL0K10428g	-3.17534	178.644	4.32015e-13	IGD1	Uncharacterized ORF; Ortholog(s) have enzyme inhibitor activity, role in negative regulation of glycogen catabolic process and cytoplasm localization
CAGL0K07381g	-3.15811	15.378	8.64376e-06	N/A	Uncharacterized ORF
CAGL0H02585g	-3.14922	2084.67	5.75635e-35	GAD1	Uncharacterized ORF; Ortholog(s) have calmodulin binding activity, role in cellular response to oxidative stress, glutamate catabolic process and cytoplasm localization
CAGL0I01100g	-3.14579	7522.17	1.67031e-27	GCY1	Uncharacterized ORF; Ortholog(s) have alditol:NADP+ 1-oxidoreductase activity, mRNA binding activity and role in D-xylose catabolic process, arabinose catabolic process, cellular response to drug, cellular response to oxidative stress
CAGL0H08778g	-3.14356	730.969	9.54312e-29	PUF2	Uncharacterized ORF; Ortholog(s) have mRNA binding activity, role in nuclear-transcribed mRNA catabolic process, deadenylation-dependent decay and cytoplasm localization
CAGL0A02233g	-3.13828	335.484	2.57243e-36	HXT6	Uncharacterized ORF; Ortholog(s) have glucose transmembrane transporter activity and mitochondrion, plasma membrane, plasma membrane enriched fraction localization
CAGL0H04873g	-3.11194	1126.08	2.83569e-58	STP3	Uncharacterized ORF; Ortholog(s) have sequence-specific DNA binding activity, role in filamentous growth and nucleus localization
CAGL0F04895g	-3.10321	4076.38	9.70716e-35	GPH1	Uncharacterized ORF; Ortholog(s) have glycogen phosphorylase activity, role in glycogen catabolic process and cell surface, cytoplasm, hyphal cell wall localization
CAGL0K08668g	-3.0856	1317.3	6.30332e-36	MET28	Uncharacterized ORF; bZIP domain-containing protein
CAGL0C02057g	-3.0604	111.824	1.00853e-15	N/A	Uncharacterized ORF
CAGL0C02519g	-3.01954	836.418	1.73136e-31	MIG3	Uncharacterized ORF; Ortholog(s) have RNA polymerase II core promoter proximal region sequence-specific DNA binding, <a href="#GOsection">more</a>
CAGL0H02101g	-3.01597	6381.36	1.2038e-39	RTC3	Uncharacterized ORF; Ortholog(s) have role in RNA metabolic process and cytoplasm, nucleus localization
CAGL0C03740g	-2.9955	510.111	3.49751e-28	N/A	Uncharacterized ORF
CAGL0H04939g	-2.96589	64.949	0.00125286	FBP1	Uncharacterized ORF; Ortholog(s) have fructose 1,6-bisphosphate 1-phosphatase activity, role in gluconeogenesis, reactive oxygen species metabolic process and cytosol localization
CAGL0I00902g	-2.94869	423.283	3.96748e-37	GAT2	Uncharacterized ORF; Has domain(s) with predicted sequence-specific DNA binding, sequence-specific DNA binding transcription factor activity, zinc ion binding activity and role in regulation of transcription, DNA-dependent
CAGL0K07205g	-2.93091	576.319	8.90262e-21	N/A	Uncharacterized ORF
CAGL0K07634g	-2.91256	187.968	4.52614e-19	GAT1	Uncharacterized ORF; Ortholog(s) have RNA polymerase II core promoter proximal region sequence-specific DNA binding transcription factor activity involved in positive regulation of transcription, <a href="#GOsection">more</a>
CAGL0L07920g	-2.90491	4052.93	0.000271371	PET18	Uncharacterized ORF; Ortholog(s) have cytosol localization
CAGL0E00341g	-2.90488	7.03027	0.00340276	HMRA1	Uncharacterized ORF; Mating type protein a1; differentially spliced transcript; expressed in both MATa and MATalpha strains
CAGL0F04917g	-2.89516	118.635	1.47353e-19	PIG1	Uncharacterized ORF; Putative regulatory subunit for protein phosphatase; gene is upregulated in azole-resistant strain
CAGL0F08217g	-2.87279	159.599	2.6238e-19	RIE1	Uncharacterized ORF; Ortholog(s) have cytoplasmic stress granule localization
CAGL0A02211g	-2.86299	1178.26	1.38572e-32	HXT7	Uncharacterized ORF; Ortholog(s) have glucose transmembrane transporter activity, pentose transmembrane transporter activity and mitochondrion, plasma membrane, plasma membrane enriched fraction localization
CAGL0L08448g	-2.81444	693.113	3.64857e-26	NCE102	Uncharacterized ORF; Ortholog(s) have role in eisosome assembly, establishment of protein localization in plasma membrane, negative regulation of protein phosphorylation, protein secretion
CAGL0H01177g	-2.78505	444.661	2.45767e-22	DPP1	Uncharacterized ORF; Ortholog(s) have diacylglycerol diphosphate phosphatase activity, phosphatidate phosphatase activity and role in farnesol biosynthetic process, phospholipid metabolic process
CAGL0I05060g	-2.76607	593.956	1.19289e-28	DOT6	Uncharacterized ORF; Ortholog(s) have sequence-specific DNA binding activity and role in chromatin silencing at rDNA, chromatin silencing at telomere, filamentous growth, regulation of transcription from RNA polymerase II promoter, unidimensional cell growth
CAGL0J06050g	-2.75763	3848.33	6.65163e-26	YGP1	Uncharacterized ORF; Ortholog(s) have role in cell wall assembly and extracellular region localization
CAGL0J04290g	-2.75038	120.483	6.65746e-19	FUS3	Uncharacterized ORF; Ortholog(s) have MAP kinase activity
CAGL0K07315g	-2.72645	4139.73	4.7357e-43	COA6	Uncharacterized ORF; Ortholog(s) Ortholog(s) have copper ion binding activity, role in cellular copper ion homeostasis, mitochondrial cytochrome c oxidase assembly and mitochondrial intermembrane space localization
CAGL0E06424g	-2.70541	5981.77	2.80917e-25	MCR1	Uncharacterized ORF; Ortholog(s) have cytochrome-b5 reductase activity and role in cellular response to oxidative stress, ergosterol biosynthetic process
CAGL0J05060g	-2.67472	2321.49	3.02258e-33	ZAP1	Uncharacterized ORF; Ortholog(s) have RNA polymerase II regulatory region sequence-specific DNA binding, sequence-specific DNA binding RNA polymerase II transcription factor activity, zinc ion binding activity
CAGL0L06072g	-2.65971	42.8735	5.78079e-11	N/A	Uncharacterized ORF; Has domain(s) with predicted nucleic acid binding, zinc ion binding activity and intracellular localization
CAGL0E05632g	-2.65771	199.937	1.43047e-14	PUT4	Uncharacterized ORF; Ortholog(s) have L-proline transmembrane transporter activity, role in gamma-aminobutyric acid transport, proline transport and Golgi apparatus, endoplasmic reticulum localization
CAGL0I00418g	-2.64422	43411.4	1.4775e-36	OLE1	Uncharacterized ORF; Ortholog(s) have electron carrier activity, stearoyl-CoA 9-desaturase activity
CAGL0M03305g	-2.63028	18.1775	7.57936e-05	PMP2	Uncharacterized ORF; Ortholog(s) have role in cation transport and membrane localization
CAGL0I05082g	-2.6292	3431	8.43212e-32	N/A	Uncharacterized ORF; Has domain(s) with predicted nucleic acid binding, nucleotide binding activity
CAGL0G02849g	-2.62695	3569.69	1.54578e-25	UIP4	Uncharacterized ORF; Ortholog(s) have endoplasmic reticulum, mitochondrial outer membrane, nuclear envelope localization
CAGL0K07678g	-2.6029	264.064	8.4265e-11	N/A	Uncharacterized ORF
CAGL0A04829g	-2.60235	28807.7	8.60389e-17	HXK1	Uncharacterized ORF; Putative hexokinase isoenzyme 2; protein differentially expressed in azole resistant strain
CAGL0D04400g	-2.58815	6.02168	0.0136222	HED1	Uncharacterized ORF; Ortholog(s) have role in negative regulation of mitotic recombination and condensed nuclear chromosome localization
CAGL0L10142g	-2.58632	489.46	1.34108e-33	RSB1	Uncharacterized ORF; Putative sphingolipid flippase; gene is upregulated in azole-resistant strain
CAGL0K10626g	-2.56723	1671.43	6.37413e-34	GSY1	Uncharacterized ORF; Ortholog(s) have glycogen (starch) synthase activity, role in glycogen biosynthetic process and mitochondrion localization
CAGL0L06666g	-2.55287	1025.27	1.40927e-35	YHB1	Verified ORF; Putative flavohemoglobin
CAGL0G05764g	-2.54543	4617.22	7.39888e-29	N/A	Uncharacterized ORF; Has domain(s) with predicted GTP binding activity, role in small GTPase mediated signal transduction and intracellular localization
CAGL0A01782g	-2.54321	2845.78	2.01726e-29	HXT4	Uncharacterized ORF; Ortholog(s) have glucose transmembrane transporter activity, pentose transmembrane transporter activity and membrane fraction localization
CAGL0B01078g	-2.53973	765.232	3.97422e-21	YLR177W	Uncharacterized ORF; Putative protein; gene is upregulated in azole-resistant strain
CAGL0B04917g	-2.51996	1096.93	0.000393361	IDP2	Verified ORF; S-adenosylmethionine synthetase
CAGL0E05808g	-2.51952	2010.67	9.16518e-18	THI6	Verified ORF; Bifunctional enzyme of thiamine biosynthesis, with thiamine-phosphate pyrophosphorylase and 4-methyl-5-beta-hydroxyethylthiazole kinase activities; active as a homohexamer
CAGL0F00605g	-2.50559	5792.36	0.00108393	EMI2	Verified ORF; Aldohexose specific glucokinase
CAGL0D02530g	-2.49939	1189.24	1.47353e-19	EGT2	Uncharacterized ORF; Putative endoglucanase; glycoside hydrolase; predicted GPI-anchor
CAGL0G07645g	-2.47864	4.35376	0.0427086	N/A	Uncharacterized ORF
CAGL0F04521g	-2.47566	379.783	2.21984e-20	ECM13	Uncharacterized ORF; Ortholog(s) have role in fungal-type cell wall organization
CAGL0C05071g	-2.46873	4812.87	1.42732e-17	THI20	Uncharacterized ORF; Ortholog(s) have hydroxymethylpyrimidine kinase activity, phosphomethylpyrimidine kinase activity, thiaminase activity, role in thiamine biosynthetic process, thiamine catabolic process and cytosol localization	N-N
CAGL0B02651g	-2.45823	92.669	2.38696e-13	MET32	Uncharacterized ORF; Ortholog(s) have RNA polymerase II activating transcription factor binding and core promoter proximal region sequence-specific DNA binding, <a href="#GOsection">more</a>
CAGL0G02739g	-2.45264	23.9813	2.64094e-06	XBP1	Uncharacterized ORF; Ortholog(s) have sequence-specific DNA binding, sequence-specific DNA binding transcription factor activity, role in response to stress and nucleus localization
CAGL0M11000g	-2.43541	437.491	1.71523e-11	EGO4	Uncharacterized ORF; Ortholog(s) have cytoplasm localization
CAGL0F04719g	-2.43063	1261.41	3.037e-15	GSY2	Uncharacterized ORF; Ortholog(s) have glycogen (starch) synthase activity, role in glycogen biosynthetic process and cytoplasm localization
CAGL0F08371g	-2.43015	3204.26	2.32145e-27	TNA1	Verified ORF; High-affinity nicotinic acid transporter; strongly induced under niacin-limiting conditions
CAGL0H10164g	-2.4269	1355.53	1.43942e-21	MUM2	Uncharacterized ORF; Ortholog(s) have role in premeiotic DNA replication and cytoplasm localization
CAGL0G04081g	-2.40427	825.665	2.30682e-14	THI73	Uncharacterized ORF; Ortholog(s) have Golgi apparatus, cell division site, cell tip, endoplasmic reticulum localization
CAGL0E05654g	-2.40352	3899.14	4.47472e-12	PGC1	Uncharacterized ORF; Ortholog(s) have phosphatidylglycerol phospholipase C activity, role in phosphatidylglycerol catabolic process and lipid particle, mitochondrion localization
CAGL0K02145g	-2.40062	17497.4	2.26772e-25	COM2	Uncharacterized ORF; Ortholog(s) have role in cellular response to sulfur dioxide, regulation of cellular response to stress
CAGL0M13277g	-2.39752	22804.5	3.39101e-27	YNK1	Uncharacterized ORF; Ortholog(s) have ATP binding, nucleoside diphosphate kinase activity
CAGL0G01056g	-2.39739	88.3895	1.70103e-11	GAS2	Uncharacterized ORF; Putative glycoside hydrolase of the Gas/Phr family; predicted GPI-anchor
CAGL0K08624g	-2.39325	988.369	2.62128e-18	HAP4	Uncharacterized ORF; Ortholog(s) have RNA polymerase II activating transcription factor binding, <a href="#GOsection">more</a>
CAGL0M00374g	-2.38877	4541.28	2.08603e-19	MET5	Uncharacterized ORF; Ortholog(s) have sulfite reductase (NADPH) activity and role in fungal-type cell wall organization, oxidation-reduction process, sulfate assimilation, sulfur amino acid biosynthetic process
CAGL0G08448g	-2.38292	1185.54	0.0197727	THI7	Uncharacterized ORF; Ortholog(s) have thiamine transmembrane transporter activity, role in thiamine transport and plasma membrane localization
CAGL0B02838g	-2.37354	627.332	1.53748e-16	MUP1	Uncharacterized ORF; Has domain(s) with predicted role in amino acid transmembrane transport and membrane localization
CAGL0M02541g	-2.35678	4.07334	0.047515	N/A	Uncharacterized ORF
CAGL0C04587g	-2.35033	1063.74	2.17794e-15	YJR098C	Uncharacterized ORF; Ortholog of <i>S. cerevisiae</i> : YJR098C
CAGL0C01749g	-2.34291	377.189	4.11417e-15	YBR242W	Uncharacterized ORF; Ortholog(s) have 5'-deoxynucleotidase activity, GMP 5'-nucleotidase activity and role in deoxyribonucleoside monophosphate catabolic process
CAGL0L06512g	-2.34221	171.41	8.64248e-16	BNS1	Uncharacterized ORF; Ortholog(s) have role in meiosis
CAGL0K04367g	-2.31945	2922.55	1.23222e-30	MUP1	Uncharacterized ORF; Ortholog(s) have L-methionine secondary active transmembrane transporter activity and role in sulfur amino acid transport
CAGL0E01881g	-2.31689	359.364	2.40947e-08	YPS11	Uncharacterized ORF; Putative aspartic protease; member of a YPS gene cluster that is required for virulence in mice; induced in response to low pH and high temperature
CAGL0F08085g	-2.31255	1081.52	1.67387e-13	FMP43	Uncharacterized ORF; Ortholog(s) have pyruvate transmembrane transporter activity, role in mitochondrial pyruvate transport and mitochondrial membrane, plasma membrane localization
CAGL0E04004g	-2.30238	619.944	2.86042e-23	MUP3	Uncharacterized ORF; Ortholog(s) have L-methionine transmembrane transporter activity and role in amino acid transport
CAGL0K07458g	-2.29371	2312.96	2.45767e-22	YPK1	Uncharacterized ORF; Ortholog(s) have protein serine/threonine kinase activity, role in eisosome assembly, negative regulation of phospholipid translocation, protein autophosphorylation and cellular bud neck, cytosol, plasma membrane localization
CAGL0G05698g	-2.29254	2156.13	1.35279e-18	GDH2	Uncharacterized ORF; Ortholog(s) have glutamate dehydrogenase (NAD+) activity, role in nitrogen compound metabolic process and cytosol, mitochondrion localization
CAGL0L09108g	-2.27803	1666.88	5.41135e-17	PDH1	Uncharacterized ORF; Ortholog(s) have role in propionate metabolic process and mitochondrial outer membrane localization
CAGL0K10868g	-2.26888	5322.23	2.85977e-21	CTA1	Verified ORF; Putative catalase A; gene is downregulated in azole-resistant strain; regulated by oxidative stress and glucose starvation; protein abundance increased in ace2 mutant cells
CAGL0B04367g	-2.239	1447.39	1.33069e-21	SCO1	Uncharacterized ORF; Ortholog(s) have copper ion binding activity, role in copper ion transport, protein complex assembly and mitochondrial inner membrane, plasma membrane localization
CAGL0G08602g	-2.20782	943.945	7.77598e-23	RPI1	Uncharacterized ORF; Ortholog(s) have small GTPase regulator activity, role in Ras protein signal transduction and nucleus localization
CAGL0G09273g	-2.19718	797.003	5.00075e-12	SNG1	Uncharacterized ORF; Putative transporter involved in nitrosoguanidine resistance; gene is downregulated in azole-resistant strain
CAGL0K01771g	-2.19265	773.646	1.10259e-14	N/A	Uncharacterized ORF; Has domain(s) with predicted transferase activity, transferring acyl groups activity
CAGL0L10362g	-2.17484	3569.07	4.04208e-18	YOR062C	Uncharacterized ORF; Ortholog of <i>S. cerevisiae</i> : YOR062C
CAGL0L04070g	-2.16522	1060.11	1.28865e-27	MRO35	Uncharacterized ORF; Ortholog(s) have structural constituent of ribosome activity and mitochondrial large ribosomal subunit, mitochondrion localization
CAGL0A01870g	-2.16282	1975.6	0.00172646	N/A	Uncharacterized ORF has domain(s) with predicted integral component of membrane localization
CAGL0J04840g	-2.14106	924.431	3.44947e-18	AIM22	Uncharacterized ORF; Ortholog(s) have role in protein lipoylation and mitochondrion localization
CAGL0M03377g	-2.14066	1902.79	1.06074e-18	GLC3	Uncharacterized ORF; Ortholog(s) have 1,4-alpha-glucan branching enzyme activity, role in glycogen biosynthetic process and cytoplasm localization
CAGL0E05566g	-2.13847	6396.74	2.45767e-22	TYE7	Uncharacterized ORF; Ortholog(s) have sequence-specific DNA binding, sequence-specific DNA binding transcription factor activity
CAGL0E06380g	-2.138	1262.37	2.09061e-10	NNR2	Uncharacterized ORF; Ortholog(s) have ATP-dependent NAD(P)H-hydrate dehydratase activity, role in nicotinamide nucleotide metabolic process and cytosol localization
CAGL0G02937g	-2.13667	133.424	5.55531e-13	PDC6	Uncharacterized ORF; Ortholog(s) have pyruvate decarboxylase activity and role in L-phenylalanine catabolic process, aromatic amino acid family catabolic process to alcohol via Ehrlich pathway, ethanol metabolic process, tryptophan catabolic process
CAGL0G02277g	-2.13288	6686.85	6.33978e-13	MRPL20	Uncharacterized ORF; Ortholog(s) have structural constituent of ribosome activity and mitochondrial large ribosomal subunit localization
CAGL0A02299g	-2.12794	4980.01	4.3534e-22	N/A	Uncharacterized ORF
CAGL0G05566g	-2.12731	970.983	7.56709e-13	FMP45	Uncharacterized ORF; Ortholog(s) have role in ascospore formation, cellular response to drug, fungal-type cell wall organization and cell cortex, cellular bud membrane, membrane raft, mitochondrion, plasma membrane enriched fraction localization
CAGL0G05357g	-2.12188	2925.74	1.70066e-12	N/A	Uncharacterized ORF
CAGL0F03839g	-2.12112	5258.75	2.82751e-09	YMR209C	Uncharacterized ORF; Ortholog of <i>S. cerevisiae</i> : YMR209C, <i>C. albicans SC5314</i> : orf19.4816, <i>C. parapsilosis CDC317</i> : CPAR2_301660, <i>Candida tenuis NRRL Y-1498</i> : CANTEDRAFT_116651 and <i>Debaryomyces hansenii CBS767</i> : DEHA2F11044g
CAGL0B02981g	-2.12093	490.964	7.31702e-23	MNT3	Uncharacterized ORF
CAGL0E03674g	-2.117	315.308	1.39414e-14	TPO1_2	Uncharacterized ORF; Has domain(s) with predicted integral to membrane localization
CAGL0C01397g	-2.11523	111.225	1.49266e-11	PFK26	Uncharacterized ORF; Ortholog(s) have 6-phosphofructo-2-kinase activity
CAGL0M07832g	-2.11294	735.144	1.31876e-14	REC107	Uncharacterized ORF; Ortholog(s) have role in reciprocal meiotic recombination and condensed nuclear chromosome localization
CAGL0I09834g	-2.09394	18.8866	0.000317097	SPS4	Uncharacterized ORF; Ortholog of <i>S. cerevisiae</i> : SPS4, <i>C. albicans SC5314</i> : orf19.7568, <i>C. parapsilosis CDC317</i> : CPAR2_200810, <i>Candida tenuis NRRL Y-1498</i> : CANTEDRAFT_112327 and <i>Debaryomyces hansenii CBS767</i> : DEHA2G06336g
CAGL0A01474g	-2.08638	386.472	4.17274e-18	SCW11	Uncharacterized ORF; Ortholog(s) have role in cytokinesis, completion of separation and cell surface, extracellular region, fungal-type cell wall localization
CAGL0F07029g	-2.08356	2428.52	1.16248e-14	MET13	Uncharacterized ORF; Ortholog(s) have methylenetetrahydrofolate reductase (NADPH) activity, role in methionine biosynthetic process, oxidation-reduction process and cytosol, mitochondrion, nucleus localization
CAGL0F02513g	-2.07734	1688.21	1.04223e-26	NCE101	Uncharacterized ORF; Ortholog(s) have role in protein secretion
CAGL0I05610g	-2.07198	52.6811	2.82174e-07	YNR014W	Uncharacterized ORF; Ortholog of <i>S. cerevisiae</i> : YNR014W
CAGL0D00198g	-2.06741	866.963	1.61905e-11	BDH1	Uncharacterized ORF; Ortholog(s) have (R,R)-butanediol dehydrogenase activity, role in butanediol biosynthetic process and cytoplasm localization
CAGL0G03047g	-2.05988	871.886	9.24562e-08	DBF2	Uncharacterized ORF; Ortholog(s) have protein serine/threonine kinase activity
CAGL0K03421g	-2.05802	474.79	2.59829e-12	PGM2	Uncharacterized ORF; Ortholog(s) have phosphoglucomutase activity
CAGL0G01122g	-2.05494	451.993	2.02491e-14	CIS1	Uncharacterized ORF; Putative protein; gene is upregulated in azole-resistant strain
CAGL0C00275g	-2.04702	38773.7	9.04159e-29	HSP31	Verified ORF; Putative cysteine protease; protein differentially expressed in azole resistant strain; gene is upregulated in azole-resistant strain
CAGL0B03014g	-2.04393	1716.06	6.87526e-23	MNT3	Has domain(s) with predicted glycosyltransferase activity and role in protein glycosylation
CAGL0A02255g	-2.03796	420.422	2.01343e-14	N/A	Uncharacterized ORF
CAGL0D00418g	-2.03783	387.977	3.80914e-09	FAT3	Uncharacterized ORF; Ortholog(s) have role in long-chain fatty acid transport
CAGL0K04961g	-2.03768	3303.85	1.18311e-20	YPD1	Uncharacterized ORF; Ortholog(s) have protein histidine kinase binding, transferase activity, transferring phosphorus-containing groups activity, role in osmosensory signaling pathway via two-component system and cytoplasm, nucleus localization
CAGL0K09702g	-2.03756	1811.1	1.31114e-17	YNL134C	Uncharacterized ORF; Putative stress-induced alcohol dehydrogenase; gene is upregulated in azole-resistant strain; protein differentially expressed in azole resistant strain
CAGL0J05390g	-2.03639	65.6813	2.73577e-09	N/A	Uncharacterized ORF
CAGL0D00726g	-2.03335	874.351	8.94447e-18	CBS1	Uncharacterized ORF; Ortholog(s) have translation regulator activity and role in mitochondrial respiratory chain complex III biogenesis, positive regulation of mitochondrial translation
CAGL0L10824g	-2.02175	2470.82	1.01375e-25	IMG1	Uncharacterized ORF; Ortholog(s) have structural constituent of ribosome activity and mitochondrial large ribosomal subunit localization
CAGL0J04268g	-2.00149	3025	2.59119e-14	ACH1	Uncharacterized ORF; Ortholog(s) have acetate CoA-transferase activity, acetyl-CoA hydrolase activity, role in acetate metabolic process, cellular response to alkalinity and cytosol, mitochondrion, soluble fraction localization
CAGL0E06116g	-2.00123	1627.11	2.48463e-14	RGM1	Uncharacterized ORF; Ortholog(s) have sequence-specific DNA binding activity, role in positive regulation of transcription from RNA polymerase II promoter and nuclear chromatin localization
CAGL0J05478g	-1.99858	10491.2	1.5353e-25	SWS2	Uncharacterized ORF; Ortholog(s) have role in regulation of sporulation resulting in formation of a cellular spore and cytosol, mitochondrion, nucleus localization
CAGL0H00572g	-1.98746	4937.53	1.01751e-08	TDA4	Uncharacterized ORF; Ortholog(s) have endoplasmic reticulum localization
CAGL0M08338g	-1.97848	3539.68	2.16984e-20	MRPL38	Uncharacterized ORF; Ortholog(s) have structural constituent of ribosome activity and mitochondrial large ribosomal subunit localization
CAGL0H03971g	-1.97438	1296.99	1.00377e-21	YCP4	Uncharacterized ORF; Ortholog(s) have membrane raft, mitochondrion, plasma membrane enriched fraction localization
CAGL0L08481g	-1.96086	64.6853	2.34244e-05	N/A	Unknown
CAGL0I05148g	-1.95917	1645.86	2.61237e-16	DLD1	Uncharacterized ORF; D-lactate ferricytochrome C oxidoreductase
CAGL0B03223g	-1.9548	7.40748	0.0225168	N/A	Uncharacterized ORF
CAGL0F02607g	-1.95473	132.18	2.79876e-11	DIT2	Uncharacterized ORF; Ortholog(s) have oxidoreductase activity, oxygen binding activity and role in ascospore wall assembly, chlamydospore formation
CAGL0M09779g	-1.95394	221.178	1.17414e-14	CTS1	Uncharacterized ORF; Putative endochitinase with a predicted role in cell separation
CAGL0I08305g	-1.94358	821.994	7.11161e-11	YAT2	Uncharacterized ORF; Ortholog(s) have carnitine O-acetyltransferase activity
CAGL0K04631g	-1.94185	384.319	1.66332e-10	YGR067C	Uncharacterized ORF has domain(s) with predicted nucleic acid binding, zinc ion binding activity
CAGL0J00715g	-1.93999	62.018	6.78204e-08	YHR022C	Uncharacterized ORF has domain(s) with predicted GTP binding, GTPase activity, role in GTP catabolic process, small GTPase mediated signal transduction and membrane localization
CAGL0E02387g	-1.93823	349.246	6.32907e-07	COQ10	Uncharacterized ORF; Ortholog(s) have ubiquinone binding activity, role in cellular respiration and mitochondrial inner membrane localization
CAGL0J04884g	-1.93705	1483.18	2.38187e-11	UBX6	Uncharacterized ORF; Ortholog(s) have role in sporulation resulting in formation of a cellular spore, ubiquitin-dependent protein catabolic process and nucleus localization
CAGL0K11968g	-1.93635	4329.71	3.7384e-10	EHD3	Uncharacterized ORF; Ortholog(s) have 3-hydroxyisobutyryl-CoA hydrolase activity and mitochondrion localization
CAGL0A03146g	-1.93584	1496.56	2.75748e-21	COI1	Uncharacterized ORF; Ortholog(s) Ortholog(s) have role in mitochondrial cytochrome c oxidase assembly, mitochondrial respirasome assembly, mitochondrial respiratory chain complex III assembly and integral component of mitochondrial inner membrane localization
CAGL0F07953g	-1.92226	86.3605	2.00864e-06	SPG1	Uncharacterized ORF; Ortholog(s) have mitochondrion localization
CAGL0C02893g	-1.91715	2069.69	1.55992e-14	HRK1	Uncharacterized ORF; Ortholog(s) have protein serine/threonine kinase activity, role in cellular ion homeostasis, protein phosphorylation, regulation of nitrogen utilization and cell division site, cell tip, cytosol localization
CAGL0I09702g	-1.9117	489.216	5.35938e-16	MCH5	Uncharacterized ORF; Ortholog(s) have riboflavin transporter activity, role in riboflavin transport and plasma membrane localization
CAGL0I01276g	-1.91133	360.845	1.90071e-12	YHR112C	Uncharacterized ORF; Ortholog(s) have cytoplasm, nucleus localization
CAGL0D00286g	-1.90994	5152.87	1.04092e-10	BMT1	Uncharacterized ORF; Beta mannosyltransferase
CAGL0J11132g	-1.90659	3702.69	3.88916e-17	MDG1	Uncharacterized ORF; Ortholog(s) have role in pheromone-dependent signal transduction involved in conjugation with cellular fusion and membrane raft, plasma membrane localization
CAGL0D05632g	-1.90636	1081.89	1.96845e-11	COX17	Uncharacterized ORF; Ortholog(s) have copper chaperone activity, role in intracellular copper ion transport, mitochondrial respiratory chain complex IV assembly and cytosol, mitochondrial intermembrane space, nucleus localization
CAGL0J01595g	-1.9028	6231.89	1.35248e-11	GLM6	Uncharacterized ORF; Gene used for molecular typing of <i>C. glabrata</i> strain isolates
CAGL0D02310g	-1.90052	3324.24	8.40356e-15	MSC6	Uncharacterized ORF; Ortholog(s) have role in reciprocal meiotic recombination and mitochondrion localization
CAGL0L11990g	-1.89991	208.86	6.00851e-15	GRX4	Uncharacterized ORF; Ortholog(s) have disulfide oxidoreductase activity, role in actin cytoskeleton organization, cellular iron ion homeostasis, cellular response to oxidative stress and nucleus localization
CAGL0H03993g	-1.89582	1929.67	6.75465e-16	CIT1	Uncharacterized ORF; Ortholog(s) have citrate (Si)-synthase activity, role in citrate metabolic process, tricarboxylic acid cycle and mitochondrion, soluble fraction localization
CAGL0H05775g	-1.89002	1770.71	1.0312e-22	MSY1	Uncharacterized ORF; Ortholog(s) have tyrosine-tRNA ligase activity, role in mitochondrial tyrosyl-tRNA aminoacylation and mitochondrion localization
CAGL0C03223g	-1.87735	960.677	5.95133e-11	SDH2	Uncharacterized ORF; Putative iron-sulfur protein subunit of succinate dehydrogenase; gene is downregulated in azole-resistant strain
CAGL0J07084g	-1.87643	2205.42	9.42332e-18	YPL113C	Uncharacterized ORF; Ortholog(s) have oxidoreductase activity, acting on the CH-OH group of donors, NAD or NADP as acceptor activity and role in metabolic process
CAGL0F07601g	-1.87554	2580.89	1.51132e-16	CWP2	Verified ORF; Putative GPI-linked cell wall protein
CAGL0B03267g	-1.86738	3431.54	4.93079e-20	MRPL27	Uncharacterized ORF; Ortholog(s) have structural constituent of ribosome activity and mitochondrial large ribosomal subunit localization
CAGL0L06864g	-1.86223	1762.07	1.26153e-15	N/A	Uncharacterized ORF; Putative protein related to ECM3; gene is downregulated in azole-resistant strain
CAGL0A00495g	-1.8622	6524.78	1.26723e-14	PMA1	Uncharacterized ORF; Putative plasma membrane proton pump with a predicted role in pH homeostasis
CAGL0H08712g	-1.85017	231.753	1.53619e-11	N/A	Uncharacterized ORF; Has domain(s) with predicted phosphatidylinositol binding activity and role in cell communication
CAGL0L09273g	-1.84555	193.841	1.05422e-11	ICL2	Uncharacterized ORF; Ortholog(s) have methylisocitrate lyase activity, role in propionate metabolic process and mitochondrial matrix localization
CAGL0G06182g	-1.84232	862.344	1.37524e-11	YHR131C	Uncharacterized ORF; Ortholog of <i>S. cerevisiae</i> : YHR131C
CAGL0J02838g	-1.8399	2059.23	2.21022e-14	RSM18	Uncharacterized ORF; Ortholog(s) have structural constituent of ribosome activity and mitochondrial small ribosomal subunit localization
CAGL0H06017g	-1.83989	323.72	2.36791e-14	FLR1	Verified ORF; Multidrug transporter of the major facilitator superfamily; gene is downregulated in azole-resistant strain
CAGL0B01012g	-1.83772	50.7534	2.82971e-07	AGP1	Uncharacterized ORF; Ortholog(s) have L-proline transmembrane transporter activity and role in amino acid transport, transmembrane transport
CAGL0I10054g	-1.83306	125.91	3.58703e-10	SKN1	Uncharacterized ORF; Ortholog(s) have glucosidase activity, role in (1->6)-beta-D-glucan biosynthetic process, fungal-type cell wall organization, sphingolipid biosynthetic process and integral to membrane localization
CAGL0G07821g	-1.82266	4057.88	5.40582e-21	GTF1	Uncharacterized ORF; Ortholog(s) have glutaminyl-tRNA synthase (glutamine-hydrolyzing) activity, role in glutaminyl-tRNAGln biosynthesis via transamidation and glutamyl-tRNA(Gln) amidotransferase complex, mitochondrion localization
CAGL0I03036g	-1.81828	3737.83	8.05372e-15	MRPL10	Uncharacterized ORF; Ortholog(s) have structural constituent of ribosome activity and mitochondrial large ribosomal subunit, nucleolus localization
CAGL0K05797g	-1.81593	1836.67	2.442e-14	EMI1	Uncharacterized ORF; Ortholog(s) have role in ascospore formation, mitochondrial respiratory chain complex assembly, positive regulation of transcription from RNA polymerase II promoter
CAGL0E00231g	-1.8096	363.647	8.56276e-12	N/A	Uncharacterized ORF; Putative adhesin-like protein; contains tandem repeats and a predicted GPI-anchor
CAGL0D06402g	-1.80901	1332.25	2.44653e-15	MET17	Verified ORF; O-acetyl homoserine sulfhydrylase (OAHSH), ortholog of S. cerevisiae MET17; required for utilization of inorganic sulfate as sulfur source; able to utilize cystine as a sulfur source while S. cerevisiae met15 mutants are unable to do so
CAGL0I07969g	-1.80828	2852.88	9.42332e-18	ATP19	Uncharacterized ORF; Ortholog(s) have hydrogen ion transporting ATP synthase activity, rotational mechanism activity and role in ATP synthesis coupled proton transport, mitochondrial proton-transporting ATP synthase complex assembly
CAGL0A03586g	-1.80122	48.3205	5.57864e-06	AFB1	Uncharacterized ORF; Ortholog(s) have role in response to pheromone triggering conjugation with cellular fusion and fungal-type cell wall localization
CAGL0H07491g	-1.80044	474.856	3.65634e-11	AMN1	Uncharacterized ORF; Ortholog(s) have role in mitotic cell cycle checkpoint, negative regulation of exit from mitosis and cellular bud, cytoplasm, nucleus localization
CAGL0H02233g	-1.79783	1027.82	2.5798e-10	PPA2	Uncharacterized ORF; Ortholog(s) have inorganic diphosphatase activity, role in aerobic respiration and mitochondrion localization
CAGL0K09372g	-1.79516	644.679	1.0984e-10	MIG2	Uncharacterized ORF; Ortholog(s) have RNA polymerase II core promoter proximal region sequence-specific DNA binding, <a href="#GOsection">more</a>
CAGL0H05379g	-1.78859	1389.18	3.04302e-10	GCR1	Uncharacterized ORF; Ortholog(s) have RNA polymerase II core promoter proximal region sequence-specific DNA binding, <a href="#GOsection">more</a>
CAGL0E05830g	-1.78693	3951.12	3.44947e-18	CBP3	Uncharacterized ORF; Ortholog(s) have ribosome binding activity, role in mitochondrial respiratory chain complex III assembly, positive regulation of mitochondrial translation and integral to mitochondrial membrane, mitochondrial ribosome localization
CAGL0L10186g	-1.78464	34725.4	1.47607e-13	TMC1	Uncharacterized ORF; Putative stress-induced protein; gene is upregulated in azole-resistant strain
CAGL0D04158g	-1.78168	2960.77	8.9549e-13	RSM25	Uncharacterized ORF; Ortholog(s) have structural constituent of ribosome activity and mitochondrial small ribosomal subunit localization
CAGL0H08283g	-1.77998	4174.13	5.78079e-11	HSP10	Uncharacterized ORF; Ortholog(s) have chaperone binding, unfolded protein binding activity, role in protein refolding and mitochondrial matrix localization
CAGL0E03740g	-1.77842	209.448	6.20219e-10	YHL026C	Uncharacterized ORF; Ortholog of <i>S. cerevisiae</i> : YHL026C
CAGL0G01408g	-1.7743	15.5201	0.00272652	N/A	Uncharacterized ORF
CAGL0M09086g	-1.76645	3831.61	6.33978e-13	BUD4	Uncharacterized ORF; Ortholog(s) have cell adhesion molecule binding activity and role in axial cellular bud site selection, cell-substrate adhesion, filamentous growth of a population of unicellular organisms, growth of symbiont in host, pathogenesis
CAGL0G10219g	-1.76618	71.6336	5.62614e-05	AWP12	Uncharacterized ORF; Adhesin-like protein with 5 tandem repeats; predicted GPI-anchor; similarity to S. cerevisiae flocculins, cell wall proteins that mediate adhesion
CAGL0G09581g	-1.7596	2146.84	4.50898e-14	TUF1	Uncharacterized ORF; Ortholog(s) have GTPase activity, translation elongation factor activity, role in mitochondrial genome maintenance, mitochondrial translation, translational elongation and mitochondrion localization
CAGL0L03982g	-1.75897	318.587	4.00247e-11	MLS1	Uncharacterized ORF; Ortholog(s) have peroxisome localization
CAGL0I10384g	-1.75878	6958.81	6.08621e-06	TPO2	Uncharacterized ORF; Ortholog(s) have spermine transmembrane transporter activity, role in cellular response to drug, spermine transport and fungal-type vacuole membrane, plasma membrane localization
CAGL0I05390g	-1.75553	1139.96	8.5551e-09	SKS1	Uncharacterized ORF; Ortholog(s) have protein serine/threonine kinase activity
CAGL0G03377g	-1.75509	8.15111	0.0339428	MAM1	Uncharacterized ORF; Ortholog(s) have role in meiotic sister chromatid cohesion involved in meiosis I and condensed nuclear chromosome kinetochore, monopolin complex localization
CAGL0B00242g	-1.74702	18.6524	0.00145757	HMLALPHA1	Uncharacterized ORF; Alpha-domain mating-type protein alpha1p
CAGL0L01551g	-1.74421	551.099	3.69493e-08	SUR7	Uncharacterized ORF; Ortholog(s) have role in ascospore formation, cellular response to biotic stimulus, cellular response to chemical stimulus, cellular response to glucose starvation and cellular response to neutral pH, <a href="#GOsection">more</a>
CAGL0M09603g	-1.74313	3165.2	1.62408e-16	MRPS8	Uncharacterized ORF; Ortholog(s) have structural constituent of ribosome activity and mitochondrial small ribosomal subunit localization
CAGL0M08552g	-1.73783	2702.22	5.72415e-14	PMP3	Uncharacterized ORF; Ortholog(s) have role in cation transport, regulation of membrane potential and plasma membrane localization
CAGL0F07997g	-1.73512	723.859	5.79493e-18	KEL2	Uncharacterized ORF; Ortholog(s) have role in conjugation with cellular fusion, negative regulation of exit from mitosis and cellular bud neck, cellular bud tip, mating projection tip localization
CAGL0M12947g	-1.73418	1368.42	2.30825e-08	PUP1	Verified ORF; Mitochondria-localized protein; gene is upregulated in azole-resistant strain
CAGL0L06006g	-1.7328	3272.26	1.66716e-08	ATG1	Uncharacterized ORF; Ortholog(s) have protein serine/threonine kinase activity
CAGL0J07568g	-1.72952	5728.09	4.79742e-12	LAP3	Uncharacterized ORF; Ortholog(s) have RNA polymerase II core promoter proximal region sequence-specific DNA binding, cysteine-type peptidase activity, double-stranded DNA binding, mRNA binding, single-stranded DNA binding activity
CAGL0M12364g	-1.72662	13.7653	0.00816685	N/A	Uncharacterized ORF
CAGL0M05995g	-1.72432	4321.67	2.66569e-15	PET10	Uncharacterized ORF; Ortholog(s) have lipid particle localization
CAGL0D04070g	-1.71888	1043.97	4.69413e-13	DPC29	Uncharacterized ORF; Ortholog(s) have mitochondrion localization
CAGL0C03916g	-1.71755	168.593	2.41793e-10	N/A	Uncharacterized ORF; Has domain(s) with predicted role in protein glycosylation
CAGL0B04851g	-1.71389	833.014	9.60665e-13	BUD3	Uncharacterized ORF; Ortholog(s) have role in cytokinesis and cellular bud neck localization
CAGL0H00759g	-1.71244	518.713	3.61506e-07	N/A	Uncharacterized ORF; Has domain(s) with predicted ATP binding, ATP-dependent 3'-5' DNA helicase activity, nucleic acid binding activity and role in DNA recombination, DNA repair, DNA replication
CAGL0J11858g	-1.71217	6589.23	1.56085e-14	RML2	Uncharacterized ORF; Ortholog(s) have role in fatty acid metabolic process
CAGL0G07315g	-1.71202	1570.26	6.76889e-12	AIM31	Uncharacterized ORF; Ortholog(s) have role in mitochondrial respiratory chain complex IV assembly, mitochondrial respiratory chain supercomplex assembly
CAGL0K05973g	-1.71068	9549.16	7.01753e-10	HSP60	Verified ORF; Heat shock protein 60, mitochondrial precursor; putative chaperonin
CAGL0D00264g	-1.70997	55.4772	8.32597e-06	NUD1	Uncharacterized ORF; Putative nuclear phosphatase regulatory subunit; gene is downregulated in azole-resistant strain
CAGL0K02409g	-1.70919	22594.4	1.78309e-19	ATP20	Uncharacterized ORF; Ortholog(s) have proton-transporting ATPase activity, rotational mechanism, structural molecule activity and role in ATP synthesis coupled proton transport, cristae formation, protein oligomerization
CAGL0E01837g	-1.70848	1018.6	1.19273e-09	YPS9	Uncharacterized ORF; Putative aspartic protease; predicted GPI-anchor; member of a YPS gene cluster that is required for virulence in mice; expression induced at high temperature
CAGL0A04389g	-1.7073	2852.38	6.68325e-18	CMC2	Uncharacterized ORF; Ortholog(s) have role in mitochondrial respiratory chain complex assembly and mitochondrial intermembrane space, nucleus localization
CAGL0I04796g	-1.69899	898.107	1.53592e-07	SCO2	Uncharacterized ORF; Ortholog(s) have mitochondrial envelope localization
CAGL0G04653g	-1.69848	2466.73	1.33804e-14	MZM1	Uncharacterized ORF; Ortholog(s) have role in mitochondrial respiratory chain complex III assembly and mitochondrial matrix localization
CAGL0B01243g	-1.69712	18.1552	0.00225375	MATALPHA1	Uncharacterized ORF; Alpha-domain mating-type protein alpha1p; expressed in all MTLalpha strains and not in MTLa strains
CAGL0F07117g	-1.69503	4036.11	2.04679e-12	GPG1	Uncharacterized ORF; Putative subunit of the heterotrimeric G protein; gene is upregulated in azole-resistant strain
CAGL0I03168g	-1.69485	246.731	2.5129e-11	YEL023C	Uncharacterized ORF; Ortholog of <i>S. cerevisiae</i> : YEL023C, <i>C. albicans SC5314</i> : orf19.5894, <i>Candida tenuis NRRL Y-1498</i> : CANTEDRAFT_101635, <i>Candida dubliniensis CD36 </i> : CD36_84380 and <i>Pichia stipitis Pignal</i> : PICST_19384
CAGL0I04328g	-1.68455	152.214	1.01295e-07	DPI8	Uncharacterized ORF; Ortholog(s) have mitochondrion localization
CAGL0B04455g	-1.67946	21.3022	0.00134625	AVT4	Uncharacterized ORF; Ortholog(s) have L-glutamine transmembrane transporter activity, L-isoleucine transmembrane transporter activity, L-tyrosine transmembrane transporter activity and role in amino acid export from vacuole
CAGL0G02563g	-1.67935	94.3492	7.12291e-06	N/A	Uncharacterized ORF; Has domain(s) with predicted ubiquitin thiolesterase activity and role in ubiquitin-dependent protein catabolic process
CAGL0M01122g	-1.67778	2015.55	7.95433e-15	MRX8	Uncharacterized ORF; Has domain(s) with predicted GTP binding activity and intracellular localization
CAGL0H07469g	-1.67702	196.539	2.92034e-09	ICS2	Uncharacterized ORF; Putative adhesin-like protein
CAGL0L03696g	-1.67655	232.393	9.18071e-08	ECM3	Uncharacterized ORF; Ortholog(s) have role in fungal-type cell wall organization and endoplasmic reticulum localization
CAGL0C02233g	-1.67624	1196.67	3.28776e-08	MXR1	Uncharacterized ORF; Ortholog(s) have peptide-methionine-(S)-S-oxide reductase activity, role in cellular response to oxidative stress and cytosol, nucleus localization
CAGL0E02915g	-1.67118	378.89	2.33501e-09	N/A	Uncharacterized ORF; Putative adhesin-like protein
CAGL0A04675g	-1.66718	1041.27	9.18071e-08	ATG8	Uncharacterized ORF; Ortholog(s) have role in CVT pathway, ER to Golgi vesicle-mediated transport, autophagic vacuole assembly, cellular membrane fusion and cellular response to nitrogen starvation, <a href="#GOsection">more</a>
CAGL0H10054g	-1.6582	296.97	3.19564e-09	YBR053C	Uncharacterized ORF; Ortholog of <i>S. cerevisiae</i> : YBR053C, <i>C. albicans SC5314</i> : orf19.2722/CGR1, <i>C. parapsilosis CDC317</i> : CPAR2_400280 and <i>Candida tenuis NRRL Y-1498</i> : CANTEDRAFT_113139
CAGL0M01100g	-1.65619	3766.1	3.63226e-10	MRPS28	Uncharacterized ORF; Ortholog(s) have structural constituent of ribosome activity and mitochondrial small ribosomal subunit localization
CAGL0H04691g	-1.65458	613.779	1.28262e-15	MRPL39	Uncharacterized ORF; Ortholog(s) have structural constituent of ribosome activity and mitochondrial large ribosomal subunit localization
CAGL0G04675g	-1.65327	1618.06	6.80166e-17	RSM28	Uncharacterized ORF; Ortholog(s) have structural constituent of ribosome activity, role in cytoplasmic translation, translational initiation and mitochondrial small ribosomal subunit localization
CAGL0C02827g	-1.65291	352.043	3.92957e-10	DSE3	Uncharacterized ORF; Ortholog(s) have cellular bud neck localization
CAGL0I02530g	-1.64762	610.334	1.31289e-10	FMO1	Uncharacterized ORF; Ortholog(s) have N,N-dimethylaniline monooxygenase activity, role in protein folding and endoplasmic reticulum membrane, mitochondrion localization
CAGL0G06006g	-1.64269	7931.46	1.71747e-09	YHR138C	Uncharacterized ORF; Ortholog(s) have endopeptidase inhibitor activity and role in vacuole fusion, non-autophagic
CAGL0F03707g	-1.63707	1120.59	1.45935e-10	N/A	Uncharacterized ORF; Has domain(s) with predicted ATP binding, protein serine/threonine kinase activity and role in protein phosphorylation
CAGL0F05071g	-1.63613	748.948	5.5106e-12	ECI1	Uncharacterized ORF; Ortholog(s) have dodecenoyl-CoA delta-isomerase activity, role in fatty acid beta-oxidation, filamentous growth and peroxisome localization
CAGL0H08888g	-1.62893	572.649	9.89132e-10	FLC3	Uncharacterized ORF; Ortholog(s) have role in heme transport and cytoplasmic vesicle, endoplasmic reticulum, mitochondrion localization
CAGL0K05813g	-1.62853	11142.3	2.97259e-07	GRX2	Uncharacterized ORF; Ortholog(s) have disulfide oxidoreductase activity, glutathione peroxidase activity, glutathione transferase activity, role in cellular response to oxidative stress, pathogenesis and cytosol, mitochondrion localization
CAGL0L00957g	-1.62638	1570.59	3.05948e-11	N/A	Uncharacterized ORF; Has domain(s) with predicted heat shock protein binding, unfolded protein binding activity and role in protein folding
CAGL0K01243g	-1.62638	7399.85	2.46778e-17	MRPL25	Uncharacterized ORF; Ortholog(s) have structural constituent of ribosome activity and mitochondrial large ribosomal subunit localization
CAGL0F06919g	-1.6252	1397.86	7.96496e-14	IRC24	Uncharacterized ORF; Ortholog(s) have cytoplasm localization
CAGL0M08448g	-1.62409	1303.79	6.3369e-15	MCD4	Uncharacterized ORF; Ortholog(s) have mannose-ethanolamine phosphotransferase activity and role in ATP transport, GPI anchor biosynthetic process, fungal-type cell wall organization
CAGL0D04972g	-1.62376	1579.96	2.67427e-10	TAZ1	Uncharacterized ORF; Ortholog(s) have 1-acylglycerophosphocholine O-acyltransferase activity
CAGL0F04125g	-1.62232	1692.4	5.97333e-13	YBL029W	Uncharacterized ORF; Ortholog of <i>S. cerevisiae</i> : YBL029W
CAGL0K10120g	-1.62143	2468.31	9.82523e-18	PET100	Uncharacterized ORF; Ortholog(s) have unfolded protein binding activity, role in aerobic respiration, mitochondrial respiratory chain complex IV assembly and integral to mitochondrial inner membrane, plasma membrane localization
CAGL0F04411g	-1.6198	2867.53	1.0001e-13	MRPL16	Uncharacterized ORF; Ortholog(s) have structural constituent of ribosome activity and mitochondrial large ribosomal subunit localization
CAGL0K11341g	-1.61711	1797.71	1.66782e-11	COX20	Uncharacterized ORF; Ortholog(s) have unfolded protein binding activity, role in aerobic respiration, mitochondrial respiratory chain complex IV assembly, protein processing and mitochondrial inner membrane localization
CAGL0K10736g	-1.61332	820.767	5.48084e-10	CYB2	Verified ORF; Ortholog(s) have L-lactate dehydrogenase (cytochrome) activity and mitochondrial intermembrane space localization
CAGL0H03531g	-1.61084	1638.47	7.20637e-15	MNP1	Uncharacterized ORF; Putative mitochondrial-nucleoid specific ribosomal protein; protein abundance decreased in ace2 mutant cells
CAGL0D00946g	-1.61068	1509.07	1.17291e-12	N/A	Uncharacterized ORF; Putative phosphatidylinositol transfer protein; gene is upregulated in azole-resistant strain
CAGL0B02167g	-1.60961	3317.52	2.85701e-11	MRPL9	Uncharacterized ORF; Ortholog(s) have mitochondrion localization
CAGL0K04609g	-1.60835	26416.6	1.21615e-06	VHT1	Uncharacterized ORF; Has domain(s) with predicted integral to membrane localization
CAGL0E03520g	-1.60296	3391.05	3.04988e-13	MRPL15	Uncharacterized ORF; Ortholog(s) have structural constituent of ribosome activity and mitochondrial large ribosomal subunit localization
CAGL0F02167g	-1.6026	292.999	2.50939e-09	MSH4	Uncharacterized ORF; Ortholog(s) have DNA binding activity, role in reciprocal meiotic recombination and nuclear chromosome localization
CAGL0D05962g	-1.59702	3335.89	7.38937e-13	CBP4	Uncharacterized ORF; Ortholog(s) have role in mitochondrial respiratory chain complex III assembly and integral to mitochondrial membrane localization
CAGL0B02882g	-1.59127	361.531	5.19889e-09	BMT2	Uncharacterized ORF; Beta mannosyltransferase; transmembrane domain protein similar to C. albicans WRY family; gene is downregulated in azole-resistant strain
CAGL0F02695g	-1.59044	1576.02	6.29728e-10	MRP20	Uncharacterized ORF; Ortholog(s) have structural constituent of ribosome activity, role in mitochondrial translation and mitochondrial large ribosomal subunit localization
CAGL0I06831g	-1.58561	1634.61	1.38707e-15	COX15	Uncharacterized ORF; Ortholog(s) have electron carrier activity, oxidoreductase activity, acting on NADH or NADPH, heme protein as acceptor activity and role in electron transport chain, heme a biosynthetic process
CAGL0L04334g	-1.58339	1947.05	2.77005e-14	PET123	Uncharacterized ORF; Ortholog(s) have structural constituent of ribosome activity and mitochondrial small ribosomal subunit localization
CAGL0K01375g	-1.583	4376.4	5.41135e-17	MRP10	Uncharacterized ORF; Ortholog(s) have structural constituent of ribosome activity, role in mitochondrial respiratory chain complex assembly, mitochondrial translation and mitochondrial small ribosomal subunit localization
CAGL0L01089g	-1.57938	4958.62	2.53162e-09	GLT1	Uncharacterized ORF; Ortholog(s) have glutamate synthase (NADH) activity and cytosol, mitochondrion localization
CAGL0C04807g	-1.5791	1377.51	2.86635e-12	RSM7	Uncharacterized ORF; Ortholog(s) have structural constituent of ribosome activity and mitochondrial small ribosomal subunit localization
CAGL0B01639g	-1.57868	4441.02	2.31419e-09	RGP1	Uncharacterized ORF; Ortholog(s) have guanyl-nucleotide exchange factor activity, role in retrograde transport, endosome to Golgi and Golgi membrane, Ric1p-Rgp1p complex, guanyl-nucleotide exchange factor complex localization
CAGL0B00154g	-1.57697	13251.4	1.21391e-10	AWP8	Putative adhesin-like protein; GPI-anchored
CAGL0K07348g	-1.57529	12.01	0.0159939	N/A	Uncharacterized ORF
CAGL0K04235g	-1.57455	4417.18	1.47989e-08	NQM1	Uncharacterized ORF; Putative transaldolase
CAGL0M00418g	-1.57362	1993.56	1.24691e-12	TIM8	Uncharacterized ORF; Ortholog(s) have protein transporter activity, role in protein import into mitochondrial inner membrane and cytosol, mitochondrial intermembrane space protein transporter complex localization
CAGL0H06435g	-1.57216	2204.7	2.09523e-11	ECM19	Uncharacterized ORF; Ortholog(s) have role in fungal-type cell wall organization and mitochondrion localization
CAGL0I04048g	-1.56847	793.014	2.55034e-09	N/A	Uncharacterized ORF; Ortholog(s) have cytosol, nucleus localization
CAGL0B02431g	-1.5679	1395.09	1.69855e-10	NDI1	Uncharacterized ORF; Ortholog(s) have NADH dehydrogenase (ubiquinone) activity and role in NADH oxidation, chronological cell aging, mitochondrial electron transport, NADH to ubiquinone, positive regulation of apoptotic process
CAGL0G07953g	-1.56168	302.899	2.39797e-08	RSM19	Uncharacterized ORF; Ortholog(s) have structural constituent of ribosome activity and mitochondrial small ribosomal subunit localization
CAGL0M11236g	-1.55781	3126.25	3.45334e-15	MRPL44	Uncharacterized ORF; Ortholog(s) have structural constituent of ribosome activity and mitochondrial large ribosomal subunit localization
CAGL0K04323g	-1.55713	1222.69	4.35812e-13	MCO32	Uncharacterized ORF; Ortholog of <i>S. cerevisiae</i> : YGR053C, <i>C. albicans SC5314</i> : orf19.91, <i>C. parapsilosis CDC317</i> : CPAR2_603120, <i>Candida tenuis NRRL Y-1498</i> : CANTEDRAFT_115930 and <i>Debaryomyces hansenii CBS767</i> : DEHA2F09658g
CAGL0G07447g	-1.55702	1736.68	3.76243e-11	MRX4	Uncharacterized ORF; Ortholog(s) have mitochondrion localization
CAGL0M03311g	-1.55193	4756.44	1.05804e-12	GTT3	Uncharacterized ORF; Ortholog(s) have plasma membrane localization
CAGL0D02024g	-1.55139	938.777	5.00071e-12	MRPL31	Uncharacterized ORF; Ortholog(s) have structural constituent of ribosome activity and mitochondrial large ribosomal subunit localization
CAGL0B02970g	-1.54579	1097.8	6.31305e-11	BMT5	Uncharacterized ORF; Beta mannosyltransferase
CAGL0J06380g	-1.54552	15942.8	5.49523e-12	INH1	Uncharacterized ORF; Ortholog(s) have enzyme inhibitor activity, role in negative regulation of ATPase activity and mitochondrion, nucleus localization
CAGL0H02387g	-1.54441	2292.41	1.12947e-11	TPS3	Uncharacterized ORF; Putative trehalose-6-phosphate synthase/phosphatase subunit; gene is upregulated in azole-resistant strain
CAGL0D02134g	-1.54322	225.773	8.07043e-09	RCI50	Uncharacterized ORF; Ortholog of <i>S. cerevisiae</i> : YKL133C
CAGL0I02706g	-1.53792	959.072	1.10348e-14	MRPL33	Uncharacterized ORF; Ortholog(s) have structural constituent of ribosome activity and mitochondrial large ribosomal subunit localization
CAGL0B00990g	-1.53161	410.038	3.49161e-10	HBN1	Uncharacterized ORF; Has domain(s) with predicted oxidoreductase activity
CAGL0C01771g	-1.52981	698.693	1.03725e-08	VVS1	Uncharacterized ORF; Ortholog(s) have fungal-type vacuole membrane localization
CAGL0B02860g	-1.52288	1870.05	3.28832e-08	ATG33	Uncharacterized ORF; Ortholog(s) have role in mitochondrion degradation and mitochondrion localization
CAGL0K06325g	-1.52279	7863.81	8.02237e-10	HEH2	Uncharacterized ORF; Ortholog(s) have role in meiosis and integral to nuclear inner membrane localization
CAGL0K02717g	-1.52206	2069.75	3.89802e-10	MRP4	Uncharacterized ORF; Ortholog(s) have structural constituent of ribosome activity and mitochondrial small ribosomal subunit localization
CAGL0K08844g	-1.51657	1436.51	1.51414e-09	AIM17	Uncharacterized ORF; Ortholog(s) have gamma-butyrobetaine dioxygenase activity, role in carnitine biosynthetic process and mitochondrion localization
CAGL0G07931g	-1.51281	715.971	9.58694e-10	MRPS12	Uncharacterized ORF; Ortholog(s) have mitochondrion, ribosome localization
CAGL0K11880g	-1.51042	1385.18	8.87404e-07	MRH1	Uncharacterized ORF; Ortholog(s) have mitochondrion, plasma membrane, plasma membrane enriched fraction localization
CAGL0L02233g	-1.51003	1390.97	1.29285e-11	MRPL13	Uncharacterized ORF; Ortholog(s) have structural constituent of ribosome activity and mitochondrial large ribosomal subunit localization
CAGL0K12100g	-1.50885	917.233	9.13544e-12	HEM13	Uncharacterized ORF; Putative coproporphyrinogen III oxidase; protein differentially expressed in azole resistant strain
CAGL0D00143g	-1.5087	98.036	1.87126e-06	N/A	Putative adhesin-like protein; predicted GPI anchor
CAGL0J09856g	-1.50231	1950.43	6.60557e-12	MRPL36	Uncharacterized ORF; Ortholog(s) have structural constituent of ribosome activity and mitochondrial large ribosomal subunit localization
CAGL0I01980g	-1.50227	1222.78	3.74465e-10	YSP1	Uncharacterized ORF; Putative activator of transcription; gene is upregulated in azole-resistant strain
CAGL0I09548g	-1.50087	1901.33	6.43697e-07	RSM23	Uncharacterized ORF; Ortholog(s) have structural constituent of ribosome activity and mitochondrial small ribosomal subunit localization
CAGL0M06391g	-1.49961	3474.39	4.75124e-08	MBA1	Uncharacterized ORF; Ortholog(s) have ribosome binding activity
CAGL0I08877g	-1.49749	1980.79	5.6854e-10	MRPS35	Uncharacterized ORF; Ortholog(s) have structural constituent of ribosome activity and mitochondrial small ribosomal subunit localization
CAGL0J01699g	-1.49576	2667.41	1.09404e-11	N/A	Uncharacterized ORF
CAGL0H02519g	-1.49273	1685.91	1.79441e-06	YMR253C	Uncharacterized ORF has domain(s) with predicted integral component of membrane localization
CAGL0L08008g	-1.49143	2205.62	4.20767e-12	PMP1	Uncharacterized ORF; Ortholog(s) have enzyme regulator activity, role in cation transport and plasma membrane localization
CAGL0G09262g	-1.49094	212.514	2.05696e-08	COA2	Cytochrome oxidase assembly factor
CAGL0I10516g	-1.49077	7142.32	2.51442e-11	YGR130C	Uncharacterized ORF; Ortholog(s) have eisosome, membrane raft localization
CAGL0F03663g	-1.48489	785.218	5.66195e-09	MRPL40	Uncharacterized ORF; Ortholog(s) have structural constituent of ribosome activity and mitochondrial large ribosomal subunit localization
CAGL0H04389g	-1.48464	509.221	9.41501e-13	GEP4	Uncharacterized ORF; Ortholog(s) have phosphatidylglycerophosphatase activity, role in cardiolipin biosynthetic process, phosphorylated carbohydrate dephosphorylation and mitochondrial matrix localization
CAGL0K07293g	-1.48203	1868.24	3.83089e-10	FAA4	Uncharacterized ORF; Ortholog(s) have long-chain fatty acid-CoA ligase activity, role in long-chain fatty acid transport, long-chain fatty-acyl-CoA metabolic process and lipid particle localization
CAGL0K03113g	-1.47766	494.363	2.21028e-07	YLF2	Uncharacterized ORF; Ortholog(s) have mitochondrion localization
CAGL0L08030g	-1.47689	463.648	9.71437e-10	SLM5	Uncharacterized ORF; Ortholog(s) have asparagine-tRNA ligase activity, role in mitochondrial asparaginyl-tRNA aminoacylation and mitochondrion localization
CAGL0E01793g	-1.47599	17880.5	7.54889e-10	YPS6	Uncharacterized ORF; Putative aspartic protease; predicted GPI-anchor; member of a YPS gene cluster that is required for virulence in mice; expression induced at high temperature
CAGL0G07513g	-1.46887	1098.74	8.71507e-10	ATP12	Uncharacterized ORF; Ortholog(s) have protein domain specific binding activity, role in mitochondrial proton-transporting ATP synthase complex assembly and mitochondrion localization
CAGL0I02596g	-1.46861	43.9233	0.00305488	N/A	Uncharacterized ORF
CAGL0F06765g	-1.4679	3130.56	1.81099e-11	INA22	Uncharacterized ORF; Ortholog(s) have mitochondrion localization
CAGL0K12980g	-1.4661	5205.43	7.59638e-11	BMT7	Uncharacterized ORF; Beta mannosyltransferase
CAGL0H09834g	-1.46081	19880	2.59245e-11	HHF3	Uncharacterized ORF; Ortholog(s) have nucleus localization
CAGL0H05907g	-1.45815	280.759	1.68634e-09	MSD1	Uncharacterized ORF; Ortholog(s) have aspartate-tRNA ligase activity, role in mitochondrial aspartyl-tRNA aminoacylation and mitochondrion localization
CAGL0H01353g	-1.45658	615.608	1.45635e-07	MHR1	Uncharacterized ORF; Ortholog(s) have recombinase activity, single-stranded DNA binding activity
CAGL0L04224g	-1.45328	1996.91	5.54428e-09	MRPL23	Uncharacterized ORF; Ortholog(s) have structural constituent of ribosome activity and mitochondrial large ribosomal subunit localization
CAGL0A01716g	-1.4524	1154.13	1.18597e-09	PNC1	Uncharacterized ORF; Ortholog(s) have nicotinamidase activity, role in chromatin silencing at rDNA, chromatin silencing at telomere, replicative cell aging and cytosol, nucleus, peroxisome localization
CAGL0I01804g	-1.45137	1334.44	1.2476e-13	MRPL6	Uncharacterized ORF; Ortholog(s) have structural constituent of ribosome activity and mitochondrial large ribosomal subunit, nucleus localization
CAGL0J06930g	-1.44916	1885.42	1.43744e-10	MRP51	Uncharacterized ORF; Ortholog(s) have structural constituent of ribosome activity, role in mitochondrial translational initiation and mitochondrial small ribosomal subunit localization
CAGL0B01793g	-1.44843	4338.79	7.60054e-12	MRX14	Uncharacterized ORF; Ortholog(s) have mitochondrion localization
CAGL0M03883g	-1.44795	2647.51	9.87417e-13	MRPS18	Uncharacterized ORF; Ortholog(s) have structural constituent of ribosome activity and mitochondrial small ribosomal subunit localization
CAGL0L08734g	-1.44468	2445.64	9.55818e-14	MRPS16	Uncharacterized ORF; Ortholog(s) have structural constituent of ribosome activity and mitochondrial small ribosomal subunit localization
CAGL0C04697g	-1.44287	725.632	8.71238e-09	RSM26	Uncharacterized ORF; Ortholog(s) have structural constituent of ribosome activity, role in cellular response to drug and mitochondrial small ribosomal subunit localization
CAGL0L08910g	-1.44188	1916.38	5.33924e-07	AEP3	Uncharacterized ORF; Ortholog(s) have role in mRNA metabolic process, mitochondrial translational initiation and extrinsic to membrane, mitochondrial inner membrane localization
CAGL0I08041g	-1.44148	1527.97	1.36481e-11	N/A	Uncharacterized ORF
CAGL0H04565g	-1.44132	1631.86	5.00071e-12	MRP21	Uncharacterized ORF; Ortholog(s) have structural constituent of ribosome activity, role in mitochondrial translational initiation and mitochondrial small ribosomal subunit localization
CAGL0L03542g	-1.43326	1741.6	6.18772e-13	MRPL49	Uncharacterized ORF; Ortholog(s) have structural constituent of ribosome activity and mitochondrial large ribosomal subunit localization
CAGL0L02607g	-1.43152	591.875	1.12606e-09	N/A	Uncharacterized ORF has domain(s) with predicted hydrolase activity and role in nucleotide catabolic process
CAGL0D03542g	-1.42738	956.827	1.232e-11	MST1	Uncharacterized ORF; Ortholog(s) have threonine-tRNA ligase activity, role in mitochondrial threonyl-tRNA aminoacylation and mitochondrion localization
CAGL0A04367g	-1.42736	509.652	9.71442e-11	IAI11	Uncharacterized ORF; Ortholog of <i>S. cerevisiae</i> : YBL059W
CAGL0I07887g	-1.42674	1781.1	4.42995e-10	ATG19	Uncharacterized ORF; Ortholog(s) have protein binding, bridging activity and role in CVT pathway, ER-associated protein catabolic process, protein complex localization, protein processing, vesicle organization
CAGL0H05819g	-1.42625	1048.13	5.6597e-11	AIM43	Uncharacterized ORF; Ortholog(s) have mitochondrion localization
CAGL0K12056g	-1.42613	2929.16	4.80613e-08	RSM10	Uncharacterized ORF; Ortholog(s) have structural constituent of ribosome activity and mitochondrial small ribosomal subunit localization
CAGL0E02255g	-1.42454	8597.57	4.16218e-12	ZEO1	Uncharacterized ORF; Ortholog(s) have role in fungal-type cell wall organization, response to stress and extrinsic to plasma membrane, mitochondrial outer membrane, plasma membrane enriched fraction localization
CAGL0B02255g	-1.42345	2579.48	3.12361e-10	RSM27	Uncharacterized ORF; Ortholog(s) have structural constituent of ribosome activity and mitochondrial small ribosomal subunit localization
CAGL0A02277g	-1.41976	221.654	1.31701e-08	N/A	Uncharacterized ORF
CAGL0E03850g	-1.41814	6287.01	1.49498e-07	N/A	Uncharacterized ORF; Ortholog(s) have cytoplasm localization
CAGL0M13541g	-1.41317	1265.83	2.78503e-11	TDA1	Uncharacterized ORF; Ortholog(s) have protein kinase activity, role in protein phosphorylation and cytoplasm, nucleus localization
CAGL0G04631g	-1.41267	383.415	7.03381e-05	IZH1	Uncharacterized ORF; Ortholog(s) have role in cellular zinc ion homeostasis and endoplasmic reticulum localization
CAGL0I02728g	-1.4104	1126.03	3.00121e-12	COX23	Uncharacterized ORF; Ortholog(s) have role in mitochondrial respiratory chain complex assembly and mitochondrion localization
CAGL0J07832g	-1.40789	3330.14	2.45347e-08	MRPL17	Uncharacterized ORF; Ortholog(s) have structural constituent of ribosome activity and mitochondrial large ribosomal subunit localization
CAGL0G07711g	-1.40717	9160.43	5.47569e-06	FCJ1	Uncharacterized ORF; Ortholog(s) have role in cristae formation, protein import into mitochondrial intermembrane space and integral to mitochondrial inner membrane, mitochondrial crista, mitochondrial crista junction, plasma membrane localization
CAGL0I01122g	-1.40394	2451.52	1.62121e-06	GRE3	Uncharacterized ORF; Ortholog(s) have D-xylose:NADP reductase activity, glucose 1-dehydrogenase (NADP+) activity, mRNA binding activity
CAGL0J09680g	-1.40225	173.924	1.64841e-07	HEM3	Uncharacterized ORF; Ortholog(s) have hydroxymethylbilane synthase activity, role in heme biosynthetic process, pathogenesis and cytoplasm, nucleus localization
CAGL0M07986g	-1.40142	683.768	2.24889e-09	PET191	Uncharacterized ORF; Ortholog(s) have role in mitochondrial respiratory chain complex IV assembly and cytosol, integral to mitochondrial inner membrane, nucleus localization
CAGL0G02717g	-1.39766	139.952	3.47426e-06	SGA1	Uncharacterized ORF; Ortholog(s) have glucan 1,4-alpha-glucosidase activity, role in glycogen catabolic process and Golgi apparatus, endoplasmic reticulum, fungal-type vacuole, prospore membrane localization
CAGL0B01815g	-1.39649	661.908	6.14255e-10	MRPL1	Uncharacterized ORF; Ortholog(s) have structural constituent of ribosome activity and mitochondrial large ribosomal subunit, nucleolus localization
CAGL0D01144g	-1.39516	801.757	3.9482e-11	CBP6	Uncharacterized ORF; Ortholog(s) have ribosome binding activity, role in mitochondrial respiratory chain complex III assembly, positive regulation of mitochondrial translation and mitochondrial ribosome localization
CAGL0K05687g	-1.39284	815.944	2.24656e-06	N/A	Uncharacterized ORF; Ortholog(s) have cytosol, nucleus localization
CAGL0J03850g	-1.39194	1134.73	2.44333e-07	MGE1	Uncharacterized ORF; Ortholog(s) have adenyl-nucleotide exchange factor activity, role in protein import into mitochondrial matrix, protein refolding and mitochondrial matrix, presequence translocase-associated import motor localization
CAGL0E05610g	-1.39185	3077.96	2.65894e-05	PYK2	Uncharacterized ORF; Ortholog(s) have pyruvate kinase activity, role in negative regulation of G0 to G1 transition, pyruvate metabolic process and cytosol, mitochondrion localization
CAGL0C01793g	-1.39069	293.376	1.43006e-06	OM14	Uncharacterized ORF; Ortholog(s) have integral to mitochondrial outer membrane localization
CAGL0M03465g	-1.39036	45.7737	0.00686943	ATO2	Uncharacterized ORF; Ortholog(s) have ammonium transmembrane transporter activity, role in ammonium transport, nitrogen utilization and mitochondrion, plasma membrane localization
CAGL0J08316g	-1.3903	1167.43	1.71316e-06	MET2	Uncharacterized ORF; Ortholog(s) have homoserine O-acetyltransferase activity, role in methionine biosynthetic process and cytosol localization
CAGL0L13178g	-1.38924	784.952	1.87079e-08	FMP25	Uncharacterized ORF; Ortholog(s) have role in mitochondrial respiratory chain complex III assembly and integral to mitochondrial inner membrane localization
CAGL0J02926g	-1.38878	470.529	1.68871e-11	PET117	Uncharacterized ORF; Cytochrome c oxidase assembly factor; mutants are respiratory-deficient
CAGL0I04620g	-1.3886	3681.73	1.18996e-08	CST26	Uncharacterized ORF; Ortholog(s) have endoplasmic reticulum, lipid particle localization
CAGL0L02431g	-1.38606	1376.89	1.55978e-08	N/A	Uncharacterized ORF; Has domain(s) with predicted role in cell redox homeostasis
CAGL0I04598g	-1.38601	1802.16	2.01986e-07	TCM62	Uncharacterized ORF; Ortholog(s) have unfolded protein binding activity, role in mitochondrial respiratory chain complex II assembly and mitochondrial inner membrane localization
CAGL0G00308g	-1.38516	748.57	2.08819e-05	SCW4	Verified ORF; Putative transglycosidase with a predicted role in the modification of 1,3-beta-glucan
CAGL0I10604g	-1.38472	807.357	9.62434e-09	YGR126W	Uncharacterized ORF; Putative protein; gene is upregulated in azole-resistant strain
CAGL0D03586g	-1.38184	631.621	8.59968e-10	ACP1	Uncharacterized ORF; Ortholog(s) have role in lipoate biosynthetic process and mitochondrion localization
CAGL0H03883g	-1.38102	2634.45	5.74988e-08	MRP7	Uncharacterized ORF; Ortholog(s) have structural constituent of ribosome activity and mitochondrial large ribosomal subunit localization
CAGL0K06105g	-1.37902	126.884	0.000315038	BOP2	Uncharacterized ORF; Ortholog of <i>S. cerevisiae</i> : BOP2
CAGL0I09372g	-1.37854	602.154	9.55554e-11	MRPL37	Uncharacterized ORF; Ortholog(s) have structural constituent of ribosome activity and mitochondrial large ribosomal subunit localization
CAGL0K08316g	-1.37586	1049.4	4.82346e-05	RHO4	Uncharacterized ORF; Ortholog(s) have GTPase activity and role in GTP catabolic process, cytokinetic cell separation, maintenance of cell polarity, positive regulation of formin-nucleated actin cable assembly
CAGL0A00539g	-1.37551	1811.41	6.61298e-07	COG7	Uncharacterized ORF; Ortholog(s) have role in CVT pathway, intra-Golgi vesicle-mediated transport and Golgi transport complex, mitochondrion localization
CAGL0G01903g	-1.37113	533.732	4.77798e-08	MET1	Uncharacterized ORF; Ortholog(s) have uroporphyrin-III C-methyltransferase activity and role in cellular response to drug, methionine biosynthetic process, siroheme biosynthetic process
CAGL0J10179g	-1.3688	620.236	2.87801e-08	TOM7	Uncharacterized ORF; Ortholog(s) have protein channel activity, role in protein import into mitochondrial matrix, protein import into mitochondrial outer membrane and mitochondrial outer membrane translocase complex localization
CAGL0I01496g	-1.36699	2409.68	9.53771e-07	SSC1	Uncharacterized ORF; Ortholog(s) have ATPase activity, enzyme regulator activity and role in positive regulation of endodeoxyribonuclease activity, protein import into mitochondrial matrix, protein refolding, protein unfolding
CAGL0I05522g	-1.36468	1340.45	1.29525e-08	UBP9	Uncharacterized ORF; Has domain(s) with predicted ubiquitin thiolesterase activity and role in ubiquitin-dependent protein catabolic process
CAGL0M12474g	-1.36424	323.927	1.83627e-08	YIL055C	Uncharacterized ORF; Ortholog of <i>S. cerevisiae</i> : YIL055C
CAGL0F09163g	-1.36413	1833.29	1.70521e-08	FMP10	Uncharacterized ORF; Ortholog(s) have mitochondrion localization
CAGL0G03773g	-1.36232	1542.14	1.89779e-07	POM33	Uncharacterized ORF; Ortholog(s) have structural constituent of nuclear pore activity
CAGL0H02123g	-1.35913	456.974	8.71238e-09	NAM8	Uncharacterized ORF; Ortholog(s) have mRNA binding activity, role in mRNA splice site selection, positive regulation of nuclear mRNA splicing, via spliceosome and U1 snRNP, U2-type prespliceosome, commitment complex localization
CAGL0L05280g	-1.35887	788.952	7.0492e-08	CYT2	Uncharacterized ORF; Ortholog(s) have holocytochrome-c synthase activity, role in cytochrome c-heme linkage and cytosol, mitochondrial intermembrane space, nucleus localization
CAGL0G03905g	-1.3581	313.401	1.36581e-08	ISA1	Uncharacterized ORF; Ortholog(s) have iron ion binding activity, role in biotin biosynthetic process, cellular iron ion homeostasis, iron-sulfur cluster assembly and mitochondrial matrix localization
CAGL0I09922g	-1.35809	1298.79	1.70871e-07	GNT1	Uncharacterized ORF; Ortholog(s) have acetylglucosaminyltransferase activity, role in protein N-linked glycosylation and Golgi medial cisterna localization
CAGL0E02607g	-1.35357	4516.76	1.76581e-07	YPT7	Uncharacterized ORF; Ortholog(s) have GTPase activity
CAGL0J09724g	-1.35324	1013.57	6.77196e-07	MRPL11	Uncharacterized ORF; Ortholog(s) have structural constituent of ribosome activity and mitochondrial large ribosomal subunit localization
CAGL0A04697g	-1.3525	1006.45	2.72252e-08	YMR31	Uncharacterized ORF; Ortholog(s) have oxoglutarate dehydrogenase (succinyl-transferring) activity, structural constituent of ribosome activity and role in 2-oxoglutarate metabolic process, tricarboxylic acid cycle
CAGL0H06699g	-1.35171	918.695	8.53011e-08	GUT2	Uncharacterized ORF; Ortholog(s) have glycerol-3-phosphate dehydrogenase activity, role in NADH oxidation, glycerol metabolic process, replicative cell aging and integral to mitochondrial outer membrane, plasma membrane localization
CAGL0M01870g	-1.35043	113.551	4.85427e-06	N/A	Uncharacterized ORF; Putative zinc finger protein; gene is upregulated in azole-resistant strain
CAGL0K11297g	-1.34833	1901.71	1.9552e-05	YDR248C	Uncharacterized ORF; Ortholog(s) have gluconokinase activity, role in D-gluconate metabolic process and cytosol, nucleus localization
CAGL0D06512g	-1.34773	327.482	4.43206e-07	N/A	Uncharacterized ORF; Putative membrane bound guanine nucleotide exchange factor; gene is upregulated in azole-resistant strain
CAGL0H10362g	-1.34715	3350.88	2.62239e-09	TMA17	Uncharacterized ORF; Ortholog(s) have cytoplasm, nucleus, ribosome localization
CAGL0M13585g	-1.34504	1330.67	2.0341e-08	HER2	Uncharacterized ORF; Ortholog(s) have glutaminyl-tRNA synthase (glutamine-hydrolyzing) activity and role in endoplasmic reticulum organization, glutaminyl-tRNAGln biosynthesis via transamidation
CAGL0J09262g	-1.34034	3963.41	6.19818e-08	STF1	Uncharacterized ORF; Ortholog(s) have role in negative regulation of ATPase activity and mitochondrion localization
CAGL0M09020g	-1.33979	222.464	0.000597742	SFC1	Uncharacterized ORF; Ortholog(s) have succinate:fumarate antiporter activity, role in fumarate transport, succinate transport and mitochondrion, plasma membrane localization
CAGL0L09383g	-1.33856	336.267	1.79362e-05	SUT2	Uncharacterized ORF; Ortholog(s) have sequence-specific DNA binding activity, role in positive regulation of sterol import by positive regulation of transcription from RNA polymerase II promoter and nucleus localization
CAGL0L06160g	-1.33836	2251.91	6.96524e-09	COX4	Uncharacterized ORF; Ortholog(s) have cytochrome-c oxidase activity, zinc ion binding activity, role in aerobic respiration, mitochondrial electron transport, cytochrome c to oxygen and mitochondrial respiratory chain complex IV, plasma membrane localization
CAGL0L05742g	-1.33691	116.767	2.18276e-06	MRS3	Uncharacterized ORF; Ortholog(s) have iron ion transmembrane transporter activity, role in RNA splicing, mitochondrial iron ion transport and mitochondrion localization
CAGL0E06072g	-1.33659	193.528	5.63773e-07	YMR181C	Uncharacterized ORF; Ortholog of <i>S. cerevisiae</i> : YMR181C
CAGL0C01435g	-1.33636	503.619	1.99011e-10	RTC6	Uncharacterized ORF; Ortholog(s) have role in ribosome biogenesis and mitochondrion localization
CAGL0I08195g	-1.3363	4020.29	5.34077e-07	GPA2	Uncharacterized ORF; Ortholog(s) have GTP binding, GTPase activity, signal transducer activity
CAGL0F08173g	-1.32954	96.5469	3.27865e-06	CPD1	Uncharacterized ORF; Ortholog(s) have 2',3'-cyclic-nucleotide 3'-phosphodiesterase activity, role in cyclic nucleotide metabolic process and clathrin-coated vesicle localization
CAGL0M10219g	-1.32917	511.043	0.000338244	LAC1	Uncharacterized ORF; Putative ceramide synthase component; gene is upregulated in azole-resistant strain
CAGL0K06391g	-1.32823	1109.29	3.88864e-10	MRPL28	Uncharacterized ORF; Ortholog(s) have structural constituent of ribosome activity and cytosol, mitochondrial large ribosomal subunit, nucleus localization
CAGL0H04301g	-1.32538	3004.26	9.39091e-07	CPR3	Uncharacterized ORF; Ortholog(s) have peptidyl-prolyl cis-trans isomerase activity, role in apoptotic process, protein folding and mitochondrion localization
CAGL0M14091g	-1.32537	119.769	7.80489e-06	N/A	Uncharacterized ORF; Putative quinone reductase/NADPH dehydrogenase; gene is upregulated in azole-resistant strain
CAGL0F01529g	-1.32529	970.233	4.35192e-08	MEF1	Uncharacterized ORF; Ortholog(s) have role in mitochondrial translation and mitochondrion localization
CAGL0A04103g	-1.32469	3044.14	3.46602e-10	UPS1	Uncharacterized ORF; Ortholog(s) have role in cardiolipin metabolic process, positive regulation of phosphatidylcholine biosynthetic process and cytosol, extrinsic to mitochondrial inner membrane, mitochondrial intermembrane space, nucleus localization
CAGL0G02695g	-1.31186	2408.51	3.60107e-10	FMC1	Uncharacterized ORF; Ortholog(s) have role in mitochondrial proton-transporting ATP synthase complex assembly and mitochondrial matrix localization
CAGL0G06776g	-1.30714	616.03	3.42538e-07	MRPL32	Uncharacterized ORF; Ortholog(s) have structural constituent of ribosome activity and mitochondrial inner membrane, mitochondrial large ribosomal subunit localization
CAGL0K10912g	-1.30515	3050.17	1.94651e-08	MRPL24	Uncharacterized ORF; Ortholog(s) have structural constituent of ribosome activity and mitochondrial large ribosomal subunit localization
CAGL0L06732g	-1.30381	901.362	4.71246e-07	MRPS9	Uncharacterized ORF; Ortholog(s) have structural constituent of ribosome activity, role in aerobic respiration and mitochondrial small ribosomal subunit localization
CAGL0J00429g	-1.30046	7161.26	6.23536e-05	COX6	Uncharacterized ORF; Cytochrome c oxidase subunit VI
CAGL0M03069g	-1.30002	3397.04	1.8764e-10	AEP2	Uncharacterized ORF; Ortholog(s) have role in mitochondrial translational initiation and mitochondrion localization
CAGL0I08481g	-1.29679	621.734	2.37687e-08	MRP2	Uncharacterized ORF; Ortholog(s) have structural constituent of ribosome activity
CAGL0M14069g	-1.29041	30.3589	0.00242908	PWP6	Uncharacterized ORF; Adhesin-like protein with similarity to S. cerevisiae flocculins, cell wall proteins that mediate adhesion; predicted GPI anchor
CAGL0L01529g	-1.28932	284.754	2.30679e-07	AIM32	Uncharacterized ORF; Ortholog of <i>S. cerevisiae</i> : AIM32, <i>C. albicans SC5314</i> : orf19.612, <i>C. parapsilosis CDC317</i> : CPAR2_702070, <i>Candida tenuis NRRL Y-1498</i> : CANTEDRAFT_114174 and <i>Debaryomyces hansenii CBS767</i> : DEHA2E10956g
CAGL0K11462g	-1.28908	1609.81	3.67883e-11	HTB1	Uncharacterized ORF; Ortholog(s) have DNA binding activity and role in chromatin assembly or disassembly, negative regulation of transcription from RNA polymerase II promoter, postreplication repair
CAGL0J06710g	-1.28262	4249.42	1.49855e-06	COQ5	Uncharacterized ORF; Ortholog(s) have 2-hexaprenyl-6-methoxy-1,4-benzoquinone methyltransferase activity, role in aerobic respiration, cellular response to drug, ubiquinone biosynthetic process and mitochondrial matrix localization
CAGL0F05863g	-1.28197	9997.66	7.02838e-07	SDH4	Uncharacterized ORF; Ortholog(s) have succinate dehydrogenase (ubiquinone) activity, role in cellular respiration and mitochondrion, plasma membrane localization
CAGL0I10494g	-1.28161	331.866	3.85411e-06	FHN1	Uncharacterized ORF; Ortholog(s) have role in establishment of protein localization in plasma membrane and Golgi apparatus, RNA polymerase transcription factor SL1 complex, membrane raft localization
CAGL0K11616g	-1.28007	573.806	1.47309e-07	OAC1	Uncharacterized ORF; Putative mitochondrial inner membrane transporter; gene is upregulated in azole-resistant strain
CAGL0E01331g	-1.27684	876.777	4.35409e-07	SWI5	Uncharacterized ORF; Transcription factor; mutants display increased fungal burdens in mouse lungs and brain
CAGL0M13189g	-1.27672	369.302	8.3428e-07	MSN4	Verified ORF; Putative transcription factor similar to S. cerevisiae Msn4p; involved in response to oxidative stress
CAGL0K01023g	-1.27667	1899.94	2.0237e-08	MRP13	Uncharacterized ORF; Ortholog(s) have structural constituent of ribosome activity and mitochondrial small ribosomal subunit localization
CAGL0G03531g	-1.27562	60.8786	0.00036861	SPR6	Uncharacterized ORF; Ortholog of <i>S. cerevisiae</i> : SPR6
CAGL0H07227g	-1.27514	990.083	8.4457e-10	OMS1	Uncharacterized ORF; Ortholog(s) have role in filamentous growth and mitochondrial envelope localization
CAGL0M08514g	-1.27309	679.236	4.62657e-09	PIR3	Uncharacterized ORF; Pir protein family member, predicted GPI-anchor
CAGL0L10015g	-1.27043	1610.42	2.27709e-10	TOM6	Uncharacterized ORF; Ortholog(s) have protein channel activity, role in mitochondrial outer membrane translocase complex assembly, protein import into mitochondrial matrix and mitochondrial outer membrane translocase complex localization
CAGL0G06402g	-1.26951	937.883	5.14768e-07	CIR2	Uncharacterized ORF; Ortholog(s) have endoplasmic reticulum, mitochondrion localization
CAGL0K02277g	-1.26867	291.743	7.85375e-08	DSE1	Uncharacterized ORF; Ortholog(s) have role in cell adhesion involved in single-species biofilm formation, cell wall organization, cellular response to glucose starvation, cytokinesis and completion of separation, <a href="#GOsection">more</a>
CAGL0J11748g	-1.26642	803.979	1.87446e-09	PLB2	Uncharacterized ORF; Putative phospholipase B; predicted GPI-anchor
CAGL0I07865g	-1.26309	91.6262	0.000315378	PHM7	Uncharacterized ORF; Ortholog(s) have Golgi apparatus, fungal-type vacuole, plasma membrane localization
CAGL0I01914g	-1.26062	1529.93	9.50259e-05	SPO12	Uncharacterized ORF; Ortholog(s) have role in meiosis I, mitotic cell cycle, regulation of exit from mitosis and nucleolus localization
CAGL0H06743g	-1.25834	518.935	3.40179e-09	COA1	Uncharacterized ORF; Ortholog(s) have role in mitochondrial respiratory chain complex IV assembly and integral to mitochondrial inner membrane localization
CAGL0M02673g	-1.25566	1490.16	7.35366e-09	COX11	Uncharacterized ORF; Ortholog(s) have copper ion binding activity, role in aerobic respiration, protein complex assembly and mitochondrial inner membrane, mitochondrial ribosome, plasma membrane localization
CAGL0L12012g	-1.25488	180.95	0.000253279	TMT1	Uncharacterized ORF; Ortholog(s) have trans-aconitate 3-methyltransferase activity and cytosol localization
CAGL0F05401g	-1.24946	1533.68	2.16842e-09	MSC2	Uncharacterized ORF; Ortholog(s) have zinc ion transmembrane transporter activity, role in cellular zinc ion homeostasis, transmembrane transport, zinc ion transport and endoplasmic reticulum localization
CAGL0L09713g	-1.24806	12309	1.3484e-07	ATP7	Uncharacterized ORF; F1F0-ATPase complex, FO D subunit
CAGL0G03927g	-1.24732	109.976	0.000265257	TPO1	Uncharacterized ORF; Ortholog(s) have drug transmembrane transporter activity, spermidine transmembrane transporter activity, spermine transmembrane transporter activity
CAGL0C03850g	-1.2421	888.993	1.87462e-05	DOT5	Uncharacterized ORF; Ortholog(s) have thioredoxin peroxidase activity, role in cell redox homeostasis, cellular response to oxidative stress and cytosol, nucleus localization
CAGL0M02519g	-1.24208	253.182	3.90685e-08	FRK1	Uncharacterized ORF; Ortholog(s) have protein kinase activity, role in protein phosphorylation and cytoplasm localization
CAGL0K09768g	-1.24203	2363.08	0.000211534	NAM9	Uncharacterized ORF; Ortholog(s) have structural constituent of ribosome activity and mitochondrial small ribosomal subunit localization
CAGL0J07150g	-1.24106	244.093	6.91735e-06	PIP2	Uncharacterized ORF; Ortholog(s) have RNA polymerase II core promoter proximal region sequence-specific DNA binding, <a href="#GOsection">more</a>
CAGL0J08976g	-1.24092	472.018	1.36673e-06	COA4	Uncharacterized ORF; Ortholog(s) have role in mitochondrial respiratory chain complex IV assembly and mitochondrial intermembrane space, nucleus localization
CAGL0E06248g	-1.24026	190.425	2.9436e-06	RCN1	Verified ORF; Regulator of calcineurin; required for cell growth and activation of the calcineurin-Crz1 pathway in the presence of micafungin; activates calcineurin-dependent signaling
CAGL0H08602g	-1.23855	826.24	4.99135e-10	MSF1	Uncharacterized ORF; Ortholog(s) have phenylalanine-tRNA ligase activity, role in mitochondrial phenylalanyl-tRNA aminoacylation and mitochondrion localization
CAGL0F04807g	-1.23811	2860.81	2.55079e-05	OM45	Uncharacterized ORF; Ortholog(s) have role in pathogenesis and cell surface, hyphal cell wall, integral to mitochondrial outer membrane, membrane fraction, plasma membrane, soluble fraction localization
CAGL0M05643g	-1.23414	1496.55	1.46962e-06	YFH1	Uncharacterized ORF; Ortholog(s) have ferrous iron binding, ferroxidase activity, iron chaperone activity and role in cellular iron ion homeostasis, cellular response to oxidative stress, glutathione metabolic process, iron-sulfur cluster assembly
CAGL0J10230g	-1.23318	776.413	3.81729e-07	MSK1	Uncharacterized ORF; Ortholog(s) have lysine-tRNA ligase activity, role in mitochondrial lysyl-tRNA aminoacylation, tRNA import into mitochondrion and mitochondrion localization
CAGL0D01694g	-1.23145	36.9341	0.00236677	SMK1	Uncharacterized ORF; Ortholog(s) have MAP kinase activity, role in ascospore wall assembly, negative regulation of sporulation resulting in formation of a cellular spore, protein phosphorylation and mitochondrion localization
CAGL0D04510g	-1.22615	1441.04	5.82129e-09	HOB2	Uncharacterized ORF; Ortholog of <i>S. cerevisiae</i> : YPR117W, <i>C. albicans SC5314</i> : orf19.1240, <i>C. parapsilosis CDC317</i> : CPAR2_500480, <i>Candida tenuis NRRL Y-1498</i> : CANTEDRAFT_120679 and <i>Debaryomyces hansenii CBS767</i> : DEHA2C07458g
CAGL0C00539g	-1.22348	406.901	2.54336e-07	AGP2	Uncharacterized ORF; Ortholog(s) have carnitine transporter activity, polyamine transmembrane transporter activity and role in carnitine transport, fatty acid metabolic process, polyamine transport, response to osmotic stress, transmembrane transport
CAGL0M12100g	-1.22236	92.7738	7.2299e-05	N/A	Uncharacterized ORF; Has domain(s) with predicted role in regulation of transcription, DNA-dependent and nucleus localization
CAGL0I04818g	-1.22016	1749.49	1.95035e-05	CHS2	Uncharacterized ORF; Ortholog(s) have chitin synthase activity, role in actomyosin contractile ring contraction, barrier septum assembly, cell wall chitin biosynthetic process, pathogenesis and cell septum, cellular bud neck localization
CAGL0K05775g	-1.21846	1777.02	8.03671e-09	ACN9	Uncharacterized ORF; Ortholog(s) have role in carbon utilization, regulation of gluconeogenesis and mitochondrial intermembrane space localization
CAGL0H06127g	-1.21843	2402.79	3.01286e-10	TIM9	Uncharacterized ORF; Ortholog(s) have protein transporter activity, unfolded protein binding activity and role in protein import into mitochondrial inner membrane
CAGL0M09614g	-1.2176	229.349	1.8852e-05	AIM36	Uncharacterized ORF; Ortholog(s) have mitochondrion, plasma membrane localization
CAGL0F00891g	-1.21757	46.3959	0.000959443	LSD2	Uncharacterized ORF; Ortholog(s) have role in ascospore wall assembly and ascospore wall, ascus lipid droplet, prospore membrane localization
CAGL0L12298g	-1.21367	5054.06	1.78716e-06	PDS1	Uncharacterized ORF; Ortholog(s) have enzyme binding activity, role in meiosis I, mitotic sister chromatid segregation, protein localization, recombinational repair and cytoplasm, nucleus, spindle localization
CAGL0G05544g	-1.21197	2442.52	4.0792e-05	HBT1	Uncharacterized ORF; Ortholog(s) have role in cell morphogenesis involved in conjugation with cellular fusion and cell surface, fungal-type cell wall, mating projection, plasma membrane enriched fraction localization
CAGL0J11198g	-1.20904	1720.97	1.57668e-08	MRPL22	Uncharacterized ORF; Ortholog(s) have structural constituent of ribosome activity and mitochondrial large ribosomal subunit localization
CAGL0M10637g	-1.20763	1872.27	3.23724e-08	MRPL50	Uncharacterized ORF; Ortholog(s) have structural constituent of ribosome activity and mitochondrial large ribosomal subunit localization
CAGL0M09317g	-1.20673	2034.39	0.000293522	AIM24	Uncharacterized ORF; Ortholog(s) have mitochondrion localization
CAGL0I05874g	-1.2065	2209.54	1.94902e-06	N/A	Verified ORF; Haloacid dehalogenase-like hydrolase
CAGL0H05995g	-1.20261	39.7439	0.00250782	AIM2	Uncharacterized ORF; Ortholog(s) have cytosol, nucleus localization
CAGL0D00462g	-1.20247	973.393	8.71049e-06	ASH1	Uncharacterized ORF; Ortholog(s) have RNA polymerase II core promoter proximal region sequence-specific DNA binding transcription factor activity involved in negative regulation of transcription, <a href="#GOsection">more</a>
CAGL0I08151g	-1.19149	193.705	3.68782e-06	N/A	Uncharacterized ORF
CAGL0H07029g	-1.18637	1679.48	3.47426e-06	MRPL35	Uncharacterized ORF; Ortholog(s) have structural constituent of ribosome activity and mitochondrial large ribosomal subunit localization
CAGL0J08272g	-1.18509	675.684	1.24635e-07	GOR1	Uncharacterized ORF; Ortholog(s) have glyoxylate reductase activity, role in glyoxylate catabolic process and cytosol, mitochondrion, nucleus localization
CAGL0I02134g	-1.18417	232.187	0.000630546	PEX18	Uncharacterized ORF; Ortholog(s) have role in protein import into peroxisome matrix and cytosol, peroxisome localization
CAGL0K02651g	-1.18296	653.594	5.02749e-07	YHL008C	Uncharacterized ORF; Ortholog(s) have small molecule sensor activity and role in chloride transport, regulation of chloride transport
CAGL0B03839g	-1.17654	574.389	3.30298e-06	MET3	Uncharacterized ORF; Ortholog(s) have sulfate adenylyltransferase (ATP) activity, role in cysteine biosynthetic process, methionine biosynthetic process, sulfate assimilation and cytosol, mitochondrion localization
CAGL0B03817g	-1.17414	1081.16	5.07835e-06	MHO1	Uncharacterized ORF; Ortholog(s) have cytosol, nucleus localization
CAGL0I07139g	-1.17351	2674.93	1.08801e-06	LSC1	Uncharacterized ORF; Ortholog(s) have succinate-CoA ligase (ADP-forming) activity, role in succinyl-CoA metabolic process and mitochondrial nucleoid localization
CAGL0A01980g	-1.17167	1862.51	1.17229e-05	IFM1	Uncharacterized ORF; Ortholog(s) have GTPase activity, tRNA binding, translation initiation factor activity, role in mitochondrial translation and mitochondrion localization
CAGL0H02491g	-1.17137	11128.6	2.79119e-10	COX7	Uncharacterized ORF; Ortholog(s) have cytochrome-c oxidase activity, role in mitochondrial electron transport, cytochrome c to oxygen and mitochondrial respiratory chain complex IV, plasma membrane localization
CAGL0B01991g	-1.17122	1004.14	0.000129412	SWF1	Uncharacterized ORF; Ortholog(s) have palmitoyltransferase activity and role in ascospore wall assembly, cortical actin cytoskeleton organization, establishment of cell polarity, protein palmitoylation, regulation of exocytosis, vacuole fusion, non-autophagic
CAGL0A04653g	-1.16849	3679.34	1.35251e-06	PET112	Uncharacterized ORF; Ortholog(s) have glutaminyl-tRNA synthase (glutamine-hydrolyzing) activity, role in glutaminyl-tRNAGln biosynthesis via transamidation, mitochondrial translation and glutamyl-tRNA(Gln) amidotransferase complex, mitochondrion localization
CAGL0I07601g	-1.16822	427.097	1.30088e-07	COQ3	Uncharacterized ORF; Ortholog(s) have hexaprenyldihydroxybenzoate methyltransferase activity, role in ubiquinone biosynthetic process and extrinsic to membrane, mitochondrial inner membrane localization
CAGL0F09185g	-1.16813	2205.4	1.06322e-06	FAU1	Uncharacterized ORF; Ortholog(s) have 5-formyltetrahydrofolate cyclo-ligase activity, role in folic acid-containing compound biosynthetic process and mitochondrion localization
CAGL0H00308g	-1.16751	1992.39	2.33641e-05	PDP3	Uncharacterized ORF; Ortholog(s) have chromatin binding activity and role in positive regulation of transcription elongation from RNA polymerase II promoter
CAGL0E01529g	-1.16671	458.61	0.000207094	PFK27	Uncharacterized ORF; Ortholog(s) have role in fructose 2,6-bisphosphate metabolic process, regulation of glycolysis
CAGL0M02783g	-1.16217	1050.57	1.2505e-08	HHO1	Uncharacterized ORF; Ortholog(s) have DNA binding activity, role in negative regulation of DNA recombination, negative regulation of chromatin silencing and nuclear nucleosome localization
CAGL0K04708g	-1.16112	200.685	7.50561e-06	N/A	Unknown
CAGL0K12254g	-1.16057	985.083	0.000422091	VID24	Uncharacterized ORF; Ortholog(s) have role in negative regulation of gluconeogenesis, proteasomal ubiquitin-dependent protein catabolic process, protein targeting to vacuole, vacuolar protein catabolic process, vesicle fusion with vacuole
CAGL0K09856g	-1.16054	1181.19	1.55277e-06	YNL092W	Uncharacterized ORF; Ortholog(s) have S-adenosylmethionine-dependent methyltransferase activity and role in protein methylation
CAGL0G08844g	-1.16012	1198.47	1.85043e-06	ASG1	Uncharacterized ORF; Ortholog(s) have sequence-specific DNA binding activity
CAGL0J05258g	-1.158	1537.03	1.55277e-06	MRPL8	Uncharacterized ORF; Ortholog(s) have structural constituent of ribosome activity, role in mitochondrial genome maintenance and mitochondrial large ribosomal subunit localization
CAGL0F06693g	-1.15585	3581.51	7.74862e-07	TIM10	Uncharacterized ORF; Ortholog(s) have protein transporter activity, unfolded protein binding activity and role in protein import into mitochondrial inner membrane
CAGL0M10329g	-1.15547	1189.46	4.71246e-07	MRP17	Uncharacterized ORF; Ortholog(s) have structural constituent of ribosome activity and mitochondrial small ribosomal subunit localization
CAGL0G01254g	-1.15545	1771.76	3.47426e-06	ARO8	Verified ORF; Putative aromatic aminotransferase I
CAGL0D05192g	-1.1545	15888.4	6.54758e-05	QCR6	Uncharacterized ORF; Ortholog(s) have ubiquinol-cytochrome-c reductase activity, role in aerobic respiration, mitochondrial electron transport, ubiquinol to cytochrome c and mitochondrial respiratory chain complex III localization
CAGL0D06688g	-1.15116	10225.8	5.77579e-07	ALD4	Uncharacterized ORF; Ortholog(s) have aldehyde dehydrogenase (NAD) activity, aldehyde dehydrogenase [NAD(P)+] activity and role in NADPH regeneration, acetate biosynthetic process, ethanol metabolic process, pyruvate metabolic process
CAGL0M05929g	-1.15101	2775.62	4.03416e-06	PAM17	Uncharacterized ORF; Ortholog(s) have role in protein import into mitochondrial matrix and plasma membrane, presequence translocase-associated import motor localization
CAGL0G07205g	-1.15073	1674.78	1.85797e-06	YML6	Uncharacterized ORF; Ortholog(s) have structural constituent of ribosome activity and mitochondrial large ribosomal subunit localization
CAGL0H00209g	-1.15012	342.434	3.43138e-05	N/A	Putative adhesin-like protein
CAGL0M05819g	-1.14793	33.8953	0.00523562	N/A	Uncharacterized ORF
CAGL0I10450g	-1.14742	38.8546	0.00991195	PEX4	Uncharacterized ORF; Ortholog(s) have ubiquitin-protein ligase activity, role in protein autoubiquitination, protein import into peroxisome matrix, receptor recycling, protein monoubiquitination and peroxisome localization
CAGL0D02046g	-1.14641	2368.87	7.84772e-08	CMC1	Uncharacterized ORF; Ortholog(s) have copper ion binding activity, role in mitochondrial respiratory chain complex IV assembly and extrinsic to mitochondrial inner membrane, mitochondrial intermembrane space localization
CAGL0K04873g	-1.1457	485.233	5.88907e-05	N/A	Uncharacterized ORF
CAGL0M12969g	-1.14247	509.886	2.06024e-05	RCI37	Uncharacterized ORF; Ortholog of <i>S. cerevisiae</i> : YIL077C
CAGL0L04730g	-1.14136	2129.68	7.27842e-08	SHY1	Uncharacterized ORF; Ortholog(s) have unfolded protein binding activity, role in aerobic respiration, mitochondrial respiratory chain complex IV assembly and integral to membrane, mitochondrial inner membrane, plasma membrane localization
CAGL0I04246g	-1.14125	1233.47	0.000176011	SUT1	Uncharacterized ORF; Putative transcription factor involved in sterol uptake; gene is upregulated in azole-resistant strain
CAGL0E00715g	-1.13924	759.609	6.79825e-05	RSM24	Uncharacterized ORF; Ortholog(s) have structural constituent of ribosome activity and mitochondrial small ribosomal subunit localization
CAGL0H02453g	-1.13563	2330.5	0.00152962	ROY1	Uncharacterized ORF; Ortholog(s) have GTPase inhibitor activity, role in endocytosis, negative regulation of GTPase activity, protein targeting to vacuole and cytoplasm, membrane fraction, nucleus, soluble fraction localization
CAGL0D05318g	-1.13316	5424.39	8.23502e-09	N/A	Uncharacterized ORF
CAGL0G01166g	-1.13081	1158.94	1.04439e-07	DIC1	Uncharacterized ORF; Ortholog(s) have dicarboxylic acid transmembrane transporter activity, role in dicarboxylic acid transport and mitochondrial envelope, plasma membrane localization
CAGL0L02453g	-1.12851	1044.21	2.52712e-05	MIT1	Uncharacterized ORF
CAGL0K02783g	-1.12632	5256.9	4.05615e-06	CAP1	Uncharacterized ORF; Ortholog(s) have actin filament binding activity and role in actin cytoskeleton organization, barbed-end actin filament capping, cell cycle cytokinesis, cellular protein localization, regulation of cell shape
CAGL0M04763g	-1.12628	1208.6	1.48643e-05	YOR289W	Uncharacterized ORF; Ortholog of <i>S. cerevisiae</i> : YOR289W
CAGL0L01925g	-1.12591	2869.54	1.9715e-05	UGP1	Uncharacterized ORF; Putative UDP-glucose pyrophosphorylase; increased protein abundance in azole resistant strain
CAGL0M00121g	-1.12484	94.588	0.00876906	AWP4	Putative adhesin-like protein; GPI-anchored; belongs to adhesin cluster V;
CAGL0M12727g	-1.12474	437.192	9.15692e-06	MAM33	Uncharacterized ORF; Ortholog(s) have role in aerobic respiration and mitochondrial matrix localization
CAGL0J01441g	-1.11687	1082.17	0.000113301	ADH3	Uncharacterized ORF; Ortholog(s) have alcohol dehydrogenase (NAD) activity, role in NADH oxidation, amino acid catabolic process to alcohol via Ehrlich pathway and mitochondrial matrix, soluble fraction localization
CAGL0D03102g	-1.11441	5391.43	2.82309e-06	COX16	Uncharacterized ORF; Ortholog(s) have role in mitochondrial respiratory chain complex IV assembly and mitochondrial inner membrane localization
CAGL0L02343g	-1.11112	3995.29	2.14793e-08	IRC22	Uncharacterized ORF; Ortholog(s) have endoplasmic reticulum localization
CAGL0F05577g	-1.10912	1257	1.01549e-06	MSS116	Uncharacterized ORF; Ortholog(s) have ATP-dependent RNA helicase activity, RNA strand annealing activity, role in Group I intron splicing, Group II intron splicing, RNA folding and mitochondrial matrix localization
CAGL0K09592g	-1.1083	2060.45	2.28553e-06	TOM22	Uncharacterized ORF; Ortholog(s) have protein channel activity and role in protein import into mitochondrial matrix, protein import into mitochondrial outer membrane
CAGL0J10494g	-1.10642	323.271	5.35542e-07	APT2	Uncharacterized ORF; Ortholog(s) have cytoplasm localization
CAGL0J11330g	-1.1054	582.125	1.46962e-06	MRPL19	Uncharacterized ORF; Ortholog(s) have structural constituent of ribosome activity and mitochondrial large ribosomal subunit localization
CAGL0H07601g	-1.10496	313.125	9.70536e-06	HFM1	Uncharacterized ORF; Ortholog(s) have DNA helicase activity, role in DNA unwinding involved in replication, reciprocal meiotic recombination, synapsis and nucleus localization
CAGL0L08888g	-1.10474	1429.75	2.21298e-06	NCR1	Uncharacterized ORF; Ortholog(s) have sphingolipid transporter activity, role in sphingolipid metabolic process and fungal-type vacuole membrane localization
CAGL0M07513g	-1.10292	1109.29	1.65818e-06	MRPL3	Uncharacterized ORF; Ortholog(s) have structural constituent of ribosome activity and mitochondrial large ribosomal subunit localization
CAGL0I00374g	-1.10206	338.556	1.86397e-06	GEP7	Uncharacterized ORF; Ortholog(s) have mitochondrion localization
CAGL0D03806g	-1.10077	1513.07	1.14482e-07	FYV4	Uncharacterized ORF; Ortholog(s) have mitochondrion localization
CAGL0K11044g	-1.10067	742.84	4.73983e-06	MRPL7	Uncharacterized ORF; Ortholog(s) have structural constituent of ribosome activity and mitochondrial large ribosomal subunit localization
CAGL0M01892g	-1.10017	28.5652	0.0114888	ECM8	Uncharacterized ORF; Ortholog(s) have role in fungal-type cell wall organization
CAGL0L03938g	-1.09623	2980.12	0.00102373	YNL115C	Uncharacterized ORF; Ortholog of <i>S. cerevisiae</i> : YNL115C
CAGL0M04037g	-1.09472	1925.89	6.87267e-06	ATP11	Uncharacterized ORF; Molecular chaperone that transiently binds to alpha and beta of the mitochondrial F1F0 ATP synthase
CAGL0J07502g	-1.09321	1285.14	0.000110627	YNL234W	Uncharacterized ORF; Putative protein similar to globins with a heme-binding domain; gene is upregulated in azole-resistant strain
CAGL0I04686g	-1.08946	10397.7	0.000272095	ATP3	Uncharacterized ORF; Ortholog(s) have proton-transporting ATPase activity, rotational mechanism activity, role in ATP synthesis coupled proton transport and mitochondrial proton-transporting ATP synthase, central stalk, plasma membrane localization
CAGL0I03784g	-1.08774	806.699	6.45064e-06	CRD1	Uncharacterized ORF; Ortholog(s) have cardiolipin synthase activity, role in cellular ion homeostasis, lipid biosynthetic process, mitochondrial membrane organization and mitochondrion localization
CAGL0F05951g	-1.08734	284.35	6.17899e-06	IMP2	Uncharacterized ORF; Ortholog(s) have endopeptidase activity, role in protein processing involved in protein targeting to mitochondrion and mitochondrial inner membrane peptidase complex localization
CAGL0C02871g	-1.08672	349.895	1.70004e-06	PNT1	Uncharacterized ORF; Ortholog(s) have role in protein insertion into mitochondrial membrane from inner side and integral to mitochondrial inner membrane localization
CAGL0D05280g	-1.08623	387.583	0.000782318	MET10	Uncharacterized ORF; Ortholog(s) have sulfite reductase (NADPH) activity, role in sulfate assimilation and cytosol, sulfite reductase complex (NADPH) localization
CAGL0M12012g	-1.08498	1355.98	1.62121e-06	CYC3	Uncharacterized ORF; Ortholog(s) have holocytochrome-c synthase activity and role in aerobic respiration, cytochrome c-heme linkage, filamentous growth of a population of unicellular organisms
CAGL0F03685g	-1.08486	394.998	7.42102e-06	COX10	Uncharacterized ORF; Ortholog(s) have role in heme a biosynthetic process and mitochondrion localization
CAGL0E02079g	-1.08459	1349.88	1.05042e-07	MSN1	Uncharacterized ORF; Ortholog(s) have sequence-specific DNA binding activity
CAGL0J08118g	-1.08416	5932.74	1.49875e-05	IST1	Uncharacterized ORF; Ortholog(s) have role in late endosome to vacuole transport via multivesicular body sorting pathway and Golgi apparatus, cytosol, endosome, nucleus localization
CAGL0L02959g	-1.08331	414.981	1.18793e-05	ALY1	Uncharacterized ORF; Ortholog(s) have ubiquitin protein ligase binding activity, role in positive regulation of ubiquitin-dependent endocytosis, regulation of intracellular transport and early endosome, late endosome localization
CAGL0M10153g	-1.08187	32.9845	0.0226112	N/A	Uncharacterized ORF; Ortholog(s) have role in Cdc42 protein signal transduction, cellular protein localization and positive regulation of establishment of bipolar cell polarity regulating cell shape, <a href="#GOsection">more</a>
CAGL0D00748g	-1.08164	1948.91	2.38552e-07	COX9	Uncharacterized ORF; Ortholog(s) have cytochrome-c oxidase activity, role in mitochondrial electron transport, cytochrome c to oxygen and mitochondrial respiratory chain complex IV, plasma membrane localization
CAGL0I10362g	-1.08025	573.825	3.01023e-05	PWP4	Uncharacterized ORF; Cell wall adhesin; predicted GPI anchor; contains tandem repeats
CAGL0J12067g	-1.07964	278.455	3.86926e-05	N/A	Putative adhesin-like protein; GPI-anchored; belongs to adhesin cluster V
CAGL0I02552g	-1.07925	1063.7	3.66723e-06	STB5	Uncharacterized ORF; Ortholog(s) have sequence-specific DNA binding, sequence-specific DNA binding transcription factor activity
CAGL0D04026g	-1.07914	270.655	4.32595e-05	UGA1	Uncharacterized ORF; Ortholog(s) have 4-aminobutyrate transaminase activity, pyridoxal phosphate binding activity, role in gamma-aminobutyric acid catabolic process, glutamate metabolic process and cytosol localization
CAGL0L12342g	-1.07814	571.135	0.000194305	SUL2	Uncharacterized ORF; Ortholog(s) have sulfate transmembrane transporter activity, role in sulfate transport and Golgi apparatus, plasma membrane, plasma membrane enriched fraction localization
CAGL0G01881g	-1.07584	784.651	5.57435e-06	MRPL51	Uncharacterized ORF; Ortholog(s) have structural constituent of ribosome activity, role in aerobic respiration and mitochondrial large ribosomal subunit localization
CAGL0L05258g	-1.07409	73.3527	0.000810471	SRX1	Uncharacterized ORF; Ortholog(s) have sulfiredoxin activity, role in cellular protein localization, cellular response to hydrogen peroxide, oxidation-reduction process and cytosol, nucleus localization
CAGL0D04488g	-1.07402	24.7322	0.0312776	RRG8	Uncharacterized ORF; Ortholog(s) have role in mitochondrial genome maintenance and mitochondrion localization
CAGL0L09691g	-1.0736	2277.06	0.00170855	PUT3	Uncharacterized ORF; Ortholog(s) have RNA polymerase II core promoter proximal region sequence-specific DNA binding, <a href="#GOsection">more</a>
CAGL0K06677g	-1.07072	1613.94	0.000202346	MET8	Uncharacterized ORF; Putative bifunctional dehydrogenase and ferrochelatase; gene is upregulated in azole-resistant strain
CAGL0H09856g	-1.0701	3107.12	1.85109e-07	HHT3	Uncharacterized ORF; Ortholog(s) have role in chromatin silencing at centromere, response to DNA damage stimulus and nucleus localization
CAGL0A01650g	-1.06965	973.297	1.27984e-05	N/A	Uncharacterized ORF; Putative protein; gene is upregulated in azole-resistant strain
CAGL0M01716g	-1.0694	50.0579	0.0249016	TEC1	Uncharacterized ORF; Ortholog(s) have RNA polymerase II core promoter proximal region sequence-specific DNA binding, <a href="#GOsection">more</a>
CAGL0G04807g	-1.06843	362.857	0.000465886	VAM3	Uncharacterized ORF; Ortholog(s) have SNAP receptor activity, protein homodimerization activity
CAGL0L12276g	-1.06603	840.98	3.24828e-06	XDJ1	Uncharacterized ORF; Ortholog(s) have integral to mitochondrial outer membrane, nucleus localization
CAGL0M12232g	-1.06478	1372.97	6.02408e-07	AIM1	Uncharacterized ORF; Ortholog(s) have mitochondrion localization
CAGL0A03212g	-1.06251	315.949	8.10224e-05	ATO3	Uncharacterized ORF; Ortholog(s) have ammonium transmembrane transporter activity, role in ammonium transport, nitrogen utilization, transmembrane transport and mitochondrion, plasma membrane localization
CAGL0K10890g	-1.06239	441.336	0.00114737	N/A	Uncharacterized ORF; Has domain(s) with predicted FMN binding, oxidoreductase activity and role in oxidation-reduction process
CAGL0H10120g	-1.06149	796.698	0.000181398	MRX18	Uncharacterized ORF; Ortholog(s) have glucan endo-1,6-beta-glucosidase activity and cytosol, nucleus localization
CAGL0D00770g	-1.06078	2663.42	9.19498e-07	IDP1	Uncharacterized ORF; Ortholog(s) have role in glutamate biosynthetic process and mitochondrial nucleoid localization
CAGL0G03883g	-1.06023	5447.18	3.95428e-05	HSP104	Verified ORF; Ortholog(s) have ADP binding, ATP binding, ATPase activity, coupled, chaperone binding, unfolded protein binding activity
CAGL0K10516g	-1.05837	2289.7	5.27356e-06	AIM13	Uncharacterized ORF; Ortholog(s) have role in cristae formation and extrinsic to mitochondrial inner membrane, mitochondrial crista junction, mitochondrial intermembrane space localization
CAGL0L00451g	-1.05593	1245.01	1.4431e-05	MRPS17	Uncharacterized ORF; Ortholog(s) have structural constituent of ribosome activity and mitochondrial small ribosomal subunit localization
CAGL0A02387g	-1.05488	576.489	2.75491e-05	MRP1	Uncharacterized ORF; Ortholog(s) have structural constituent of ribosome activity and mitochondrial small ribosomal subunit localization
CAGL0C05467g	-1.05282	50.43	0.00243822	MFG1	Uncharacterized ORF; Ortholog of <i>S. cerevisiae</i> : MFG1
CAGL0K09350g	-1.0525	872.008	0.000204805	SIP2	Uncharacterized ORF; Ortholog(s) have AMP-activated protein kinase activity
CAGL0M11902g	-1.05037	1489.46	0.0018103	FUN19	Uncharacterized ORF; Ortholog of <i>S. cerevisiae</i> : FUN19
CAGL0M08250g	-1.05033	3151.84	1.11083e-06	ZRT3	Uncharacterized ORF; Ortholog(s) have zinc ion transmembrane transporter activity, role in cellular zinc ion homeostasis, zinc ion transport and fungal-type vacuole membrane localization
CAGL0K04521g	-1.05019	178.245	0.000415743	COX18	Uncharacterized ORF; Ortholog(s) have membrane insertase activity, role in protein insertion into mitochondrial membrane from inner side and integral to mitochondrial inner membrane localization
CAGL0G01474g	-1.05011	905.371	8.46901e-05	BOP3	Uncharacterized ORF; Ortholog(s) have role in cellular response to methylmercury and cytoplasm, nucleus localization
CAGL0A03883g	-1.04875	941.959	1.66566e-05	QRI5	Uncharacterized ORF; Ortholog(s) have role in mRNA processing and integral to mitochondrial inner membrane localization
CAGL0J11484g	-1.04824	987.072	7.35939e-06	DUG3	Verified ORF; Component of the Dug1p-Dug2p-Dug3p complex involved in glutathione degradation; required for glutathione utilization in C. glabrata when glutathione import is enabled by expression of the S. cerevisiae Opt1p transporter
CAGL0B00264g	-1.04731	158.223	4.23219e-05	HMLALPHA2	Uncharacterized ORF; Homeobox-domain protein alpha2
CAGL0L01683g	-1.04585	2259.64	1.52586e-06	BLI1	Uncharacterized ORF; Ortholog(s) have endosome localization
CAGL0F02519g	-1.04498	742.082	9.12746e-05	YJL206C	Uncharacterized ORF; Has domain(s) with predicted DNA binding, sequence-specific DNA binding transcription factor activity, zinc ion binding activity, role in regulation of transcription, DNA-dependent, transcription, DNA-dependent and nucleus localization
CAGL0B03201g	-1.04442	916.967	0.00243161	YKR011C	Uncharacterized ORF; Ortholog of <i>S. cerevisiae</i> : YKR011C
CAGL0K07854g	-1.04371	296.325	0.000181117	DIB1	Uncharacterized ORF; Ortholog(s) have role in mitotic cell cycle G2/M transition checkpoint, nuclear mRNA splicing, via spliceosome, regulation of mitotic metaphase/anaphase transition and U4/U6 x U5 tri-snRNP complex, U5 snRNP localization
CAGL0M08184g	-1.04181	450.86	0.00276713	STE3	Uncharacterized ORF; Putative a-factor pheromone receptor
CAGL0C02623g	-1.0397	8457.08	1.44991e-07	COX8	Uncharacterized ORF; Ortholog(s) have cytochrome-c oxidase activity, role in mitochondrial electron transport, cytochrome c to oxygen and mitochondrial respiratory chain complex IV, plasma membrane localization
CAGL0L07953g	-1.03815	2231.51	8.68337e-06	N/A	Uncharacterized ORF
CAGL0C03696g	-1.0373	324.267	1.31777e-05	N/A	Uncharacterized ORF
CAGL0M04455g	-1.03682	1132.3	4.38744e-06	SLS1	Uncharacterized ORF; Ortholog(s) have role in aerobic respiration, mitochondrial translation and integral to membrane, mitochondrial inner membrane, mitochondrial nucleoid localization
CAGL0K04455g	-1.03519	107.754	0.00287476	SPR3	Uncharacterized ORF; Ortholog(s) have role in ascospore formation and ascospore wall, prospore membrane, septin complex localization
CAGL0A00341g	-1.03512	439.024	0.000734435	MPO1	Uncharacterized ORF; Ortholog(s) have fatty acid alpha-oxygenase activity and role in fatty acid alpha-oxidation, sphingoid catabolic process
CAGL0H06611g	-1.03452	2324.92	1.77559e-06	ESL1	Uncharacterized ORF; Ortholog of <i>S. cerevisiae</i> :ESL1
CAGL0J00187g	-1.03197	6561.72	3.47426e-06	YGR026W	Uncharacterized ORF; Ortholog of <i>S. cerevisiae</i> : YGR026W, <i>C. albicans SC5314</i> : orf19.3872, <i>C. parapsilosis CDC317</i> : CPAR2_204920, <i>Candida tenuis NRRL Y-1498</i> : CANTEDRAFT_113460 and <i>Debaryomyces hansenii CBS767</i> : DEHA2F13288g
CAGL0B00814g	-1.03164	2102.11	2.5149e-05	LSB5	Uncharacterized ORF; Ortholog(s) have role in actin cortical patch localization, actin filament organization, endocytosis and actin cortical patch, spindle pole body localization
CAGL0A02992g	-1.02955	321.681	0.000183811	BCS1	Uncharacterized ORF; Ortholog(s) have protein transmembrane transporter activity and role in chaperone-mediated protein complex assembly, mitochondrial respiratory chain complex III assembly, protein insertion into mitochondrial membrane from inner side
CAGL0D00902g	-1.02896	201.488	0.00153243	RAD59	Uncharacterized ORF; Ortholog(s) have DNA strand annealing activity, role in double-strand break repair via single-strand annealing, telomere maintenance via recombination and nucleus localization
CAGL0J09922g	-1.02863	1457.77	3.40225e-06	SUN4	Uncharacterized ORF; Ortholog(s) have role in cellular response to biotic stimulus, cytokinetic cell separation and filamentous growth of a population of unicellular organisms in response to biotic stimulus, <a href="#GOsection">more</a>
CAGL0J02904g	-1.02694	2727.28	0.000504886	GIP2	Uncharacterized ORF; Ortholog(s) have protein phosphatase regulator activity, role in glycogen metabolic process, protein dephosphorylation and protein phosphatase type 1 complex localization
CAGL0C02651g	-1.02625	573.419	3.51235e-06	ATP10	Uncharacterized ORF; Ortholog(s) have unfolded protein binding activity, role in mitochondrial proton-transporting ATP synthase complex assembly and integral to mitochondrial membrane, mitochondrial inner membrane localization
CAGL0F05115g	-1.0262	578.154	2.59505e-05	INA1	Uncharacterized ORF; Ortholog(s) have plasma membrane localization
CAGL0B05061g	-1.02468	105.896	0.0251301	AWP9	Putative adhesin-like protein; encoded in megasatellite cluster; involved in yeast-to-yeast adhesion; GPI-anchored
CAGL0F02343g	-1.02461	4039.98	4.37647e-06	YFH7	Uncharacterized ORF; Ortholog(s) have ATPase activity and cytosol, nucleus localization
CAGL0D05412g	-1.02375	976.177	5.36899e-06	MRPS5	Uncharacterized ORF; Ortholog(s) have structural constituent of ribosome activity and mitochondrial small ribosomal subunit localization
CAGL0M02167g	-1.02322	4322.23	8.9747e-05	PRM4	Uncharacterized ORF; Has domain(s) with predicted electron carrier activity, protein disulfide oxidoreductase activity and role in cell redox homeostasis
CAGL0H03311g	-1.02025	351.715	0.000143591	YGL081W	Uncharacterized ORF; Ortholog of <i>S. cerevisiae</i> : YGL081W
CAGL0K07436g	-1.01965	1739.2	8.75715e-07	YHM2	Uncharacterized ORF; Ortholog(s) have DNA binding, tricarboxylate secondary active transmembrane transporter activity and role in alpha-ketoglutarate transport, mitochondrial citrate transport, mitochondrial genome maintenance
CAGL0A03542g	-1.01949	8720.43	7.15228e-07	COX12	Uncharacterized ORF; Cytochrome c oxidase
CAGL0I09988g	-1.01896	5549.98	2.8483e-05	PSH1	Uncharacterized ORF; Ortholog(s) have ubiquitin-protein ligase activity, role in protein ubiquitination involved in ubiquitin-dependent protein catabolic process and chromosome, centromeric region, nucleus localization
CAGL0I08085g	-1.01381	7963.13	1.92704e-06	EMI5	Uncharacterized ORF; Ortholog(s) have succinate dehydrogenase (ubiquinone) activity
CAGL0M07271g	-1.01305	704.777	0.000327503	GRX5	Uncharacterized ORF; Ortholog(s) have disulfide oxidoreductase activity, role in cellular response to oxidative stress, response to osmotic stress and mitochondrial matrix localization
CAGL0D03608g	-1.01244	28.4791	0.0414659	N/A	Uncharacterized ORF; Has domain(s) with predicted sequence-specific DNA binding, sequence-specific DNA binding transcription factor activity, zinc ion binding activity and role in regulation of transcription, DNA-dependent
CAGL0K11440g	-1.01032	11086.3	0.000454799	HTA1	Uncharacterized ORF; Ortholog(s) have role in DNA damage induced protein phosphorylation, DNA repair, negative regulation of transcription from RNA polymerase II promoter, protein localization to kinetochore, signal transduction in response to DNA damage
CAGL0M10021g	-1.00882	108.19	0.00254887	N/A	Uncharacterized ORF
CAGL0F09207g	-1.00874	5834.81	2.64912e-05	BAT1	Uncharacterized ORF; Ortholog(s) have branched-chain-amino-acid transaminase activity, role in branched chain family amino acid biosynthetic process, branched chain family amino acid catabolic process and mitochondrial matrix localization
CAGL0G01738g	-1.00744	420.63	0.00144842	N/A	Uncharacterized ORF
CAGL0H04125g	-1.00586	3454.19	6.77333e-07	ALO1	Uncharacterized ORF; Ortholog(s) have D-arabinono-1,4-lactone oxidase activity
CAGL0G02057g	-1.00545	70.6687	0.00151537	YKR075C	Uncharacterized ORF; Ortholog of <i>S. cerevisiae</i> : YKR075C
CAGL0I06534g	-1.00493	1212.07	4.11884e-06	OXA1	Uncharacterized ORF; Ortholog(s) have membrane insertase activity, mitochondrial ribosome binding activity
CAGL0I02002g	-1.00402	3729.06	3.33229e-06	LIN1	Uncharacterized ORF; Ortholog(s) have U4/U6 x U5 tri-snRNP complex, U5 snRNP, chromatin localization
CAGL0K04939g	-1.00336	348.278	2.53568e-05	PPN2	Uncharacterized ORF; Ortholog(s) have endopolyphosphatase activity, role in polyphosphate catabolic process and fungal-type vacuole, vacuolar lumen localization
CAGL0G09977g	-1.0033	1793.99	0.00118009	GDB1	Uncharacterized ORF; Ortholog(s) have 4-alpha-glucanotransferase activity, amylo-alpha-1,6-glucosidase activity, role in glycogen catabolic process and mitochondrion localization
CAGL0A03080g	-1.00187	790.405	7.82162e-05	SDH6	Uncharacterized ORF; Ortholog(s) have role in mitochondrial respiratory chain complex II assembly
CAGL0E03630g	-1.00069	322.273	0.000235995	RIM4	Uncharacterized ORF; Ortholog(s) have RNA binding activity and role in negative regulation of conjugation with cellular fusion, premeiotic DNA replication, reciprocal meiotic recombination, sporulation resulting in formation of a cellular spore
CAGL0H05797g	-1.00067	3369.14	4.2505e-07	MGR2	Uncharacterized ORF; Ortholog(s) have role in protein import into mitochondrial matrix and mitochondrial inner membrane presequence translocase complex, plasma membrane localization
CAGL0H00781g	-1.00036	549.139	3.53148e-05	YPL247C	Uncharacterized ORF; Ortholog of <i>S. cerevisiae</i> : YPL247C

## Sheet: Data 2d
Data 2d	Enriched gene ontology (GO) terms for biological process (BP), molecular function (MF), and cellular component (CC) of proteins encoded by genes that were upregulated (A) and downregulated (B) in response to micafungin exposure in the ipi1R70H strain
(A) Upregulated genes
GO category	GOID	GO_term	Cluster frequency	Background frequency	Corrected P-value	False discovery rate	Gene(s) annotated to the term	Directly Annotated GOID List
BP	45229	external encapsulating structure organization	9 out of 337 genes, 2.7%	19 out of 5614 background genes, 0.3%	0.00012	0	CHS3:UTR2:GAS1:CRH1:CAGL0I06644g:CNB1:CNA1:KRE1:YPS1	97720:44419:70370:31505:55074:5975:6508:51701:6402:34976:35690:71555
BP	71555	cell wall organization	9 out of 337 genes, 2.7%	19 out of 5614 background genes, 0.3%	0.00012	0	CHS3:UTR2:GAS1:CRH1:CAGL0I06644g:CNB1:CNA1:KRE1:YPS1	97720:44419:70370:31505:55074:5975:6508:6402:51701:34976:35690:71555
BP	71554	cell wall organization or biogenesis	9 out of 337 genes, 2.7%	26 out of 5614 background genes, 0.5%	0.00289	0	CHS3:UTR2:GAS1:CRH1:CAGL0I06644g:CNB1:CNA1:KRE1:YPS1	97720:44419:70370:31505:55074:5975:6508:6402:51701:34976:35690:71555
BP	42254	ribosome biogenesis	14 out of 337 genes, 4.2%	65 out of 5614 background genes, 1.2%	0.00564	0.01	CAGL0A04037g:CAGL0D04180g:CAGL0E02585g:CAGL0E05874g:RPP0:CAGL0G01991g:CAGL0H02057g:CAGL0H02937g:CAGL0I10670g:CAGL0J01265g:CAGL0K01859g:CAGL0L04950g:CAGL0L07678g:CAGL0L11638g	42254:6396:42274:6364:1522:467:154
BP	31505	fungal-type cell wall organization	7 out of 337 genes, 2.1%	17 out of 5614 background genes, 0.3%	0.00769	0.012	CHS3:GAS1:CAGL0I06644g:CNB1:CNA1:KRE1:YPS1	97720:44419:70370:31505:55074:6508:6402:51701:34976:35690
BP	22613	ribonucleoprotein complex biogenesis	15 out of 337 genes, 4.5%	76 out of 5614 background genes, 1.4%	0.00867	0.01	CAGL0A04037g:CAGL0D01628g:CAGL0D04180g:CAGL0E02585g:CAGL0E05874g:RPP0:CAGL0G01991g:CAGL0H02057g:CAGL0H02937g:CAGL0I10670g:CAGL0J01265g:CAGL0K01859g:CAGL0L04950g:CAGL0L07678g:CAGL0L11638g	42254:6396:387:42274:6364:1522:467:154
BP	71852	fungal-type cell wall organization or biogenesis	7 out of 337 genes, 2.1%	20 out of 5614 background genes, 0.4%	0.02619	0.0171	CHS3:GAS1:CAGL0I06644g:CNB1:CNA1:KRE1:YPS1	97720:44419:70370:31505:55074:6508:6402:51701:34976:35690
BP	44403	biological process involved in symbiotic interaction	4 out of 337 genes, 1.2%	7 out of 5614 background genes, 0.1%	0.09773	0.0275	EPA1:AED1:CNB1:EFG1	44406:44419:70370:31505:55074:6402:51701:34976:36164:35690:1900231
BP	51701	biological process involved in interaction with host	4 out of 337 genes, 1.2%	7 out of 5614 background genes, 0.1%	0.09773	0.0244	EPA1:AED1:CNB1:EFG1	44406:44419:70370:31505:55074:6402:51701:34976:36164:35690:1900231
MF	No significant ontology term can be found for input genes.
CC	5618	cell wall	11 out of 337 genes, 3.3%	44 out of 5614 background genes, 0.8%	0.00181	0	UTR2:EPA1:TIR2:GAS1:CRH1:SSR1:AWP3a:AWP3b:AWP2:AED1:CAGL0M03773g	9986:9277:5576:5618:5886:62040
CC	9277	fungal-type cell wall	10 out of 337 genes, 3.0%	40 out of 5614 background genes, 0.7%	0.0041	0	UTR2:EPA1:TIR2:GAS1:CRH1:SSR1:AWP3a:AWP3b:AWP2:AED1	9986:9277:5576:5886:62040
CC	71944	cell periphery	36 out of 337 genes, 10.7%	352 out of 5614 background genes, 6.3%	0.04476	0.0267	CAGL0B03619g:CAGL0B04257g:UTR2:ARG1:CAGL0D01474g:ASC1:KAR2:CAGL0D06050g:CAGL0E02321g:EPA1:TIR2:GAS1:RPP0:CAGL0G08954g:CRH1:SSR1:CAGL0I01430g:CAGL0J04466g:CAGL0J11176g:AWP3a:AWP3b:AWP2:FKS2:AED1:CAGL0L00561g:SUN4:CAGL0L08294g:CAGL0L11836g:ECM7:SAC7:CAGL0M03773g:YPS1:CAGL0M05049g:AHP1:CAGL0M12320g:MP65	9986:5829:9277:5840:16020:5618:30479:148:5576:62040:5886
CC	30312	external encapsulating structure	32 out of 337 genes, 9.5%	309 out of 5614 background genes, 5.5%	0.0699	0.045	CAGL0B03619g:CAGL0B04257g:UTR2:ARG1:ASC1:KAR2:CAGL0E02321g:EPA1:TIR2:GAS1:RPP0:CRH1:SSR1:CAGL0I01430g:CAGL0J04466g:CAGL0J11176g:AWP3a:AWP3b:AWP2:FKS2:AED1:CAGL0L00561g:SUN4:CAGL0L08294g:CAGL0L11836g:SAC7:CAGL0M03773g:YPS1:CAGL0M05049g:AHP1:CAGL0M12320g:MP65	9986:5829:9277:5840:16020:5618:148:5576:5886:62040
(B) Downregulated genes
GO category	GOID	GO_term	Cluster frequency	Background frequency	Corrected P-value	False discovery rate	Gene(s) annotated to the term	Directly Annotated GOID List
BP	17004	cytochrome complex assembly	9 out of 639 genes, 1.4%	10 out of 5614 background genes, 0.2%	1.07e-05	0	CAGL0B04367g:CAGL0D01144g:CAGL0G04653g:CAGL0G09262g:CAGL0H06743g:CAGL0I04796g:CAGL0J08976g:CAGL0K10120g:CAGL0K11341g	34551:33617:6878:8535
BP	33108	mitochondrial respiratory chain complex assembly	9 out of 639 genes, 1.4%	10 out of 5614 background genes, 0.2%	1.07e-05	0	CAGL0A03080g:CAGL0D01144g:CAGL0G04653g:CAGL0G09262g:CAGL0H06743g:CAGL0J08976g:CAGL0K05775g:CAGL0K10120g:CAGL0K11341g	34551:34553:33617
BP	8535	respiratory chain complex IV assembly	7 out of 639 genes, 1.1%	8 out of 5614 background genes, 0.1%	0.00068	0	CAGL0B04367g:CAGL0G09262g:CAGL0H06743g:CAGL0I04796g:CAGL0J08976g:CAGL0K10120g:CAGL0K11341g	33617:6878:8535
BP	7005	mitochondrion organization	13 out of 639 genes, 2.0%	29 out of 5614 background genes, 0.5%	0.00224	0	CAGL0A03080g:CAGL0D01144g:CAGL0D04488g:CAGL0G02695g:CAGL0G04653g:CAGL0G09262g:CAGL0H01353g:CAGL0H06743g:CAGL0J08976g:CAGL0K05775g:CAGL0K10120g:CAGL0K11341g:CAGL0M06391g	6310:33615:34551:34553:33617:32979:2
BP	33617	mitochondrial cytochrome c oxidase assembly	5 out of 639 genes, 0.8%	6 out of 5614 background genes, 0.1%	0.04024	0.004	CAGL0G09262g:CAGL0H06743g:CAGL0J08976g:CAGL0K10120g:CAGL0K11341g	33617
BP	46148	pigment biosynthetic process	5 out of 639 genes, 0.8%	6 out of 5614 background genes, 0.1%	0.04024	0.0033	CAGL0F03685g:ARO8:MET1:CAGL0I06831g:MET8	103:19354:9058:6783:19558:46148:6784
BP	6112	energy reserve metabolic process	5 out of 639 genes, 0.8%	6 out of 5614 background genes, 0.1%	0.04024	0.0029	CAGL0F04719g:GDB1:CAGL0J03080g:CAGL0K10626g:CAGL0M03377g	6112:5980:5978:5975
BP	5977	glycogen metabolic process	4 out of 639 genes, 0.6%	4 out of 5614 background genes, 0.1%	0.06541	0.02	CAGL0F04719g:GDB1:CAGL0K10626g:CAGL0M03377g	5980:5978:5975
BP	5978	glycogen biosynthetic process	4 out of 639 genes, 0.6%	4 out of 5614 background genes, 0.1%	0.06541	0.0178	CAGL0F04719g:GDB1:CAGL0K10626g:CAGL0M03377g	5980:5978:5975
BP	6091	generation of precursor metabolites and energy	19 out of 639 genes, 3.0%	69 out of 5614 background genes, 1.2%	0.06607	0.016	CAGL0A04829g:CAGL0C02623g:SDH2:CAGL0D00748g:CAGL0D05192g:CAGL0E02387g:CAGL0E03850g:GLK1:CAGL0F04719g:CAGL0F08261g:CAGL0G06402g:GDB1:CIT1:COX6:CAGL0J03080g:CAGL0K04235g:CAGL0K10626g:CAGL0L06160g:CAGL0M03377g	6122:6096:5980:22900:45333:6744:6101:1678:5975:6112:5978:6123:6098:6099
BP	15980	energy derivation by oxidation of organic compounds	14 out of 639 genes, 2.2%	44 out of 5614 background genes, 0.8%	0.09184	0.0164	CAGL0C02623g:SDH2:CAGL0D00748g:CAGL0D05192g:CAGL0E02387g:CAGL0E03850g:CAGL0F04719g:GDB1:CIT1:COX6:CAGL0J03080g:CAGL0K10626g:CAGL0L06160g:CAGL0M03377g	6122:5980:45333:6744:6101:5975:6112:5978:6123:6099
MF	3735	structural constituent of ribosome	51 out of 639 genes, 8.0%	134 out of 5614 background genes, 2.4%	8.42e-14	0	CAGL0B01793g:CAGL0B01815g:CAGL0B02167g:CAGL0B03267g:CAGL0C01435g:CAGL0C04807g:CAGL0D04158g:CAGL0D05412g:CAGL0E00715g:CAGL0E03520g:CAGL0F02695g:CAGL0F04411g:CAGL0G01881g:CAGL0G06776g:CAGL0G07205g:CAGL0G07931g:CAGL0G07953g:MNP1:CAGL0H03883g:CAGL0H04565g:CAGL0I01804g:CAGL0I02706g:CAGL0I03036g:CAGL0I08481g:CAGL0J02838g:CAGL0J05258g:CAGL0J05478g:CAGL0J07832g:CAGL0J09856g:CAGL0J11198g:CAGL0J11330g:RML2…	3735:19843:3676:3723:16740:4525
MF	5198	structural molecule activity	56 out of 639 genes, 8.8%	188 out of 5614 background genes, 3.3%	5.37e-10	0	CAGL0B01793g:CAGL0B01815g:CAGL0B02167g:CAGL0B03267g:CAGL0C01435g:CAGL0C04807g:CAGL0D04158g:CAGL0D05412g:CAGL0E00715g:CAGL0E03520g:CAGL0F02695g:CAGL0F04411g:CWP1.1:CAGL0G01881g:CAGL0G06776g:CAGL0G07205g:CAGL0G07931g:CAGL0G07953g:MNP1:CAGL0H03883g:CAGL0H04565g:HHF3:HHT3:CAGL0I01804g:CAGL0I02706g:CAGL0I03036g:CAGL0I08481g:CAGL0J02838g:CAGL0J05258g:CAGL0J05478g:CAGL0J07832g:CAGL0J09856g:CAGL0J11198g:…	3735:19843:3676:30527:3677:46982:3723:5199:16740:4525
MF	16491	oxidoreductase activity	42 out of 639 genes, 6.6%	200 out of 5614 background genes, 3.6%	0.00944	0	CAGL0A02387g:HBN1:CAGL0B02431g:IDP2:CAGL0C02233g:SDH2:CAGL0C03850g:CAGL0C04697g:CAGL0D00198g:IDP1:CAGL0D05280g:ALD4:CAGL0E03850g:CAGL0E06424g:CAGL0F02607g:CAGL0F06919g:MET13:GDH2:CAGL0G06402g:YCP4:CAGL0H04125g:CAGL0H06699g:CAGL0I00418g:GCY1:GRE3:CAGL0I02530g:CAGL0I06831g:ADH2:CAGL0J08272g:CAGL0K05687g:MET8:CAGL0K08844g:CAGL0K09702g:CYB2:CTA1:CAGL0K10890g:CAGL0K12100g:GLT1:CAGL0L05258g:YHB1:CAGL0M…	51536:50660:3954:16639:3955:5506:51287:8270:16717:4768:16616:16653:50661:43115:4352:3959:16491:4368:16040:4174:16620:4499:9055:4322:3885:3824:19825:4497:32542:4489:8113:287:16209:16651:46872:4450:4096:15930:4784:16705:10181:4109:8199:16899:4325:51537:20037
CC	5840	ribosome	46 out of 639 genes, 7.2%	128 out of 5614 background genes, 2.3%	1.3e-11	0	CAGL0B01793g:CAGL0B01815g:CAGL0B02167g:CAGL0B03267g:CAGL0C01435g:CAGL0D04158g:CAGL0D05412g:CAGL0E03520g:CAGL0F02695g:CAGL0F04411g:CAGL0G06776g:CAGL0G07205g:CAGL0G07931g:CAGL0G07953g:MNP1:CAGL0H03883g:CAGL0H04565g:CAGL0I01804g:CAGL0I02706g:CAGL0I03036g:CAGL0I08481g:CAGL0I09548g:CAGL0J02838g:CAGL0J05258g:CAGL0J05478g:CAGL0J09856g:CAGL0J11198g:CAGL0J11330g:RML2:CAGL0K01243g:CAGL0K02717g:CAGL0K09768g…	5763:15934:15935:5762:5840
CC	5739	mitochondrion	45 out of 639 genes, 7.0%	151 out of 5614 background genes, 2.7%	3.57e-08	0	COX12:CAGL0A04103g:CAGL0A04697g:CAGL0B03267g:CAGL0B04367g:CAGL0C01793g:CAGL0C02623g:CAGL0D01144g:CAGL0D03102g:CAGL0D04158g:CAGL0D05192g:CAGL0D05632g:CAGL0E03520g:CAGL0F03685g:SDH4:CAGL0F05951g:CAGL0F08085g:CAGL0I04796g:CAGL0I09548g:COX6:CAGL0J06380g:CAGL0J08976g:CAGL0J09262g:CAGL0J09856g:CAGL0J10179g:CAGL0K01243g:CAGL0K02409g:CAGL0K05775g:CAGL0K07315g:CAGL0K09592g:CAGL0K10120g:CAGL0K11341g:CAGL0L…	1405:5763:276:42720:5758:5739:31966:5762:45277:5759:5750:5743:61671:16020:5740:5742:5751:9353:5576:5741
CC	44391	ribosomal subunit	16 out of 639 genes, 2.5%	37 out of 5614 background genes, 0.7%	7.41e-05	0	CAGL0B01815g:CAGL0B03267g:CAGL0D04158g:CAGL0E03520g:CAGL0G06776g:CAGL0G07931g:CAGL0I02706g:CAGL0I03036g:CAGL0I09548g:CAGL0J09856g:CAGL0J11198g:RML2:CAGL0K01243g:CAGL0K02717g:CAGL0K09768g:CAGL0M08338g	5763:5840:5762:15934:15935
CC	15934	large ribosomal subunit	11 out of 639 genes, 1.7%	20 out of 5614 background genes, 0.4%	0.00021	0	CAGL0B01815g:CAGL0B03267g:CAGL0E03520g:CAGL0G06776g:CAGL0I02706g:CAGL0I03036g:CAGL0J09856g:CAGL0J11198g:RML2:CAGL0K01243g:CAGL0M08338g	5840:5762:15934
CC	5740	mitochondrial envelope	24 out of 639 genes, 3.8%	78 out of 5614 background genes, 1.4%	0.00025	0	CAGL0A04103g:CAGL0B04367g:CAGL0C01793g:CAGL0C02623g:CAGL0D03102g:CAGL0D05192g:CAGL0D05632g:CAGL0F03685g:SDH4:CAGL0F05951g:CAGL0F08085g:CAGL0I04796g:COX6:CAGL0J08976g:CAGL0J10179g:CAGL0K02409g:CAGL0K09592g:CAGL0K11341g:CAGL0L06160g:ATP7:CAGL0L10015g:CAGL0M04455g:CAGL0M05929g:CAGL0M06391g	1405:276:42720:5758:31966:5750:5743:5740:16020:5742:5751:5741
CC	5759	mitochondrial matrix	9 out of 639 genes, 1.4%	17 out of 5614 background genes, 0.3%	0.00275	0	CAGL0A04697g:CAGL0B03267g:CAGL0D04158g:CAGL0E03520g:CAGL0I09548g:CAGL0J09856g:CAGL0K01243g:CAGL0M05929g:CAGL0M12727g	1405:5763:5762:5759:9353
CC	71944	cell periphery	65 out of 639 genes, 10.2%	352 out of 5614 background genes, 6.3%	0.00307	0	PMA1:HXT4:CAGL0A01870g:HXT6/7:HXT4/6/7:CAGL0A02277g:CAGL0A02299g:CAGL0A04829g:AWP8:HBN1:AWP9:HSP31:CAGL0C03916g:CAGL0D00198g:CAGL0D00418g:EGT2:MET15:ALD4:YPS11:TPO1_2:CAGL0E05610g:CAGL0E06424g:GLK1:CAGL0F04895g:CAGL0F05115g:CWP1.1:CAGL0F08261g:SCW4:ARO8:CAGL0G01738g:TPO1_1:CAGL0G05357g:CAGL0G05566g:AWP12:CAGL0H02101g:CAGL0H02585g:YCP4:FLR1:FLR2:CAGL0H10076g:GCY1:GRE3:CAGL0I01496g:CAGL0I05874g:CAG…	5737:5829:5777:16021:5834:5886:786:9277:16020:15:5576:62040
CC	98798	mitochondrial protein-containing complex	18 out of 639 genes, 2.8%	59 out of 5614 background genes, 1.1%	0.00502	0	CAGL0A04697g:CAGL0B03267g:CAGL0C02623g:CAGL0D01144g:CAGL0D04158g:CAGL0D05192g:CAGL0E03520g:CAGL0F05951g:CAGL0I09548g:COX6:CAGL0J09856g:CAGL0J10179g:CAGL0K01243g:CAGL0K02409g:CAGL0L06160g:ATP7:CAGL0L10015g:CAGL0M05929g	1405:5763:276:42720:5762:5750:61671:16020:5742:5751:9353
CC	43228	non-membrane-bounded organelle	53 out of 639 genes, 8.3%	276 out of 5614 background genes, 4.9%	0.00575	0	CAGL0B01793g:CAGL0B01815g:CAGL0B02167g:CAGL0B03267g:CAGL0C01435g:CAGL0D04158g:CAGL0D05412g:CAGL0E03520g:CAGL0F02695g:CAGL0F04411g:CAGL0G06776g:CAGL0G07205g:CAGL0G07931g:CAGL0G07953g:MNP1:CAGL0H03883g:CAGL0H04565g:HHF3:HHT3:CAGL0I01804g:CAGL0I02706g:CAGL0I03036g:CAGL0I08481g:CAGL0I09548g:CAGL0J02838g:CAGL0J05258g:CAGL0J05478g:CAGL0J09856g:CAGL0J11198g:CAGL0J11330g:RML2:CAGL0K01243g:CAGL0K02717g:CA…	5763:5840:794:8290:5762:15934:786:5634:15935:62040
CC	43232	intracellular non-membrane-bounded organelle	53 out of 639 genes, 8.3%	276 out of 5614 background genes, 4.9%	0.00575	0	CAGL0B01793g:CAGL0B01815g:CAGL0B02167g:CAGL0B03267g:CAGL0C01435g:CAGL0D04158g:CAGL0D05412g:CAGL0E03520g:CAGL0F02695g:CAGL0F04411g:CAGL0G06776g:CAGL0G07205g:CAGL0G07931g:CAGL0G07953g:MNP1:CAGL0H03883g:CAGL0H04565g:HHF3:HHT3:CAGL0I01804g:CAGL0I02706g:CAGL0I03036g:CAGL0I08481g:CAGL0I09548g:CAGL0J02838g:CAGL0J05258g:CAGL0J05478g:CAGL0J09856g:CAGL0J11198g:CAGL0J11330g:RML2:CAGL0K01243g:CAGL0K02717g:CA…	5763:5840:794:8290:5762:15934:786:5634:15935:62040
CC	16020	membrane	85 out of 639 genes, 13.3%	503 out of 5614 background genes, 9.0%	0.0059	0	PMA1:HXT4:CAGL0A01870g:HXT6/7:HXT4/6/7:CAGL0A03212g:COX12:CAGL0B01012g:MUP1:CAGL0B04367g:CAGL0C00539g:CAGL0C01771g:CAGL0C01793g:CAGL0C02623g:CAGL0D00418g:CAGL0D03102g:CAGL0D04422g:CAGL0D05192g:CAGL0E01353g:TPO1_2:CAGL0E04004g:CAGL0E05632g:CAGL0F03685g:CAGL0F05115g:CAGL0F05401g:SDH4:CAGL0F05951g:CAGL0F08085g:TPO1_1:CAGL0G04631g:CAGL0G04807g:CAGL0G05566g:CAGL0G05632g:THI7:CAGL0H00572g:CAGL0H02519g:…	1405:276:42720:5789:5739:45261:31966:45277:16021:5834:5750:5886:5743:5637:5740:16020:5742:5751:5576:5741:62040
CC	31967	organelle envelope	25 out of 639 genes, 3.9%	99 out of 5614 background genes, 1.8%	0.00693	0	CAGL0A04103g:CAGL0B04367g:CAGL0C01793g:CAGL0C02623g:CAGL0D03102g:CAGL0D05192g:CAGL0D05632g:CAGL0F03685g:SDH4:CAGL0F05951g:CAGL0F08085g:CAGL0I04796g:COX6:CAGL0J08976g:CAGL0J10179g:CAGL0K02409g:CAGL0K06325g:CAGL0K09592g:CAGL0K11341g:CAGL0L06160g:ATP7:CAGL0L10015g:CAGL0M04455g:CAGL0M05929g:CAGL0M06391g	1405:276:42720:5758:31966:5750:5743:5637:5740:16020:5742:5751:5741
CC	31975	envelope	25 out of 639 genes, 3.9%	99 out of 5614 background genes, 1.8%	0.00693	0	CAGL0A04103g:CAGL0B04367g:CAGL0C01793g:CAGL0C02623g:CAGL0D03102g:CAGL0D05192g:CAGL0D05632g:CAGL0F03685g:SDH4:CAGL0F05951g:CAGL0F08085g:CAGL0I04796g:COX6:CAGL0J08976g:CAGL0J10179g:CAGL0K02409g:CAGL0K06325g:CAGL0K09592g:CAGL0K11341g:CAGL0L06160g:ATP7:CAGL0L10015g:CAGL0M04455g:CAGL0M05929g:CAGL0M06391g	1405:276:42720:5758:31966:5750:5743:5637:5740:16020:5742:5751:5741
CC	31966	mitochondrial membrane	20 out of 639 genes, 3.1%	71 out of 5614 background genes, 1.3%	0.00699	0	CAGL0B04367g:CAGL0C01793g:CAGL0C02623g:CAGL0D03102g:CAGL0D05192g:CAGL0F03685g:CAGL0F05951g:CAGL0F08085g:CAGL0I04796g:COX6:CAGL0J10179g:CAGL0K02409g:CAGL0K09592g:CAGL0K11341g:CAGL0L06160g:ATP7:CAGL0L10015g:CAGL0M04455g:CAGL0M05929g:CAGL0M06391g	1405:276:42720:31966:5750:5743:16020:5742:5751:5741
CC	313	organellar ribosome	6 out of 639 genes, 0.9%	10 out of 5614 background genes, 0.2%	0.02593	0.0013	CAGL0B03267g:CAGL0D04158g:CAGL0E03520g:CAGL0I09548g:CAGL0J09856g:CAGL0K01243g	5763:5762
CC	5761	mitochondrial ribosome	6 out of 639 genes, 0.9%	10 out of 5614 background genes, 0.2%	0.02593	0.0012	CAGL0B03267g:CAGL0D04158g:CAGL0E03520g:CAGL0I09548g:CAGL0J09856g:CAGL0K01243g	5763:5762
CC	5886	plasma membrane	13 out of 639 genes, 2.0%	42 out of 5614 background genes, 0.7%	0.04576	0.0012	HXT6/7:HXT4/6/7:CAGL0D00418g:TPO1_2:CAGL0F05115g:TPO1_1:CAGL0G05566g:FLR1:FLR2:CAGL0I08195g:TPO3:CAGL0L01551g:CYN1	5834:5886:5576:62040
CC	30312	external encapsulating structure	54 out of 639 genes, 8.5%	309 out of 5614 background genes, 5.5%	0.05998	0.0011	PMA1:HXT4:CAGL0A01870g:CAGL0A02277g:CAGL0A02299g:CAGL0A04829g:AWP8:HBN1:AWP9:HSP31:CAGL0C03916g:CAGL0D00198g:CAGL0D00418g:EGT2:MET15:ALD4:YPS11:CAGL0E05610g:CAGL0E06424g:GLK1:CAGL0F04895g:CAGL0F05115g:CWP1.1:CAGL0F08261g:SCW4:ARO8:CAGL0G01738g:CAGL0G05357g:AWP12:CAGL0H02101g:CAGL0H02585g:YCP4:CAGL0H10076g:GCY1:GRE3:CAGL0I01496g:CAGL0I05874g:CAGL0J00451g:HSP12:CAGL0J06050g:CAGL0J07568g:CAGL0J09922…	5737:5829:5777:16021:5886:786:9277:16020:15:5576:62040
CC	315	organellar large ribosomal subunit	4 out of 639 genes, 0.6%	5 out of 5614 background genes, 0.1%	0.06585	0.0011	CAGL0B03267g:CAGL0E03520g:CAGL0J09856g:CAGL0K01243g	5762
CC	5762	mitochondrial large ribosomal subunit	4 out of 639 genes, 0.6%	5 out of 5614 background genes, 0.1%	0.06585	0.001	CAGL0B03267g:CAGL0E03520g:CAGL0J09856g:CAGL0K01243g	5762

## Sheet: Data 2e
Data 2e	Differentially expressed genes both in the wild-type strain and ipi1R70H in response to micafungin exposure
(A) Upregulated genes (log2 Fold change >1, adjusted p-value <0.05)
	CBS138			ipi1R70H
GeneID	log2FoldChange	baseMean	padj	log2FoldChange	baseMean	padj		Description
CAGL0I00220g	4.09095	381.126	3.72577e-26	4.68362	460.223	2.37934e-53	EPA23	Uncharacterized ORF; Predicted GPI-linked adhesin-like protein
CAGL0I10010g	3.79917	1090.3	9.64566e-13	3.13677	1243.32	7.15716e-24	BTN2	Uncharacterized ORF; Ortholog(s) have SNARE binding activity, role in amino acid transport, intracellular protein transport, regulation of pH, retrograde transport, endosome to Golgi and cytosol, late endosome, perinuclear region of cytoplasm localization
CAGL0B02475g	3.45528	169.852	8.93341e-30	3.34155	154.587	5.83281e-20	PHO84	Uncharacterized ORF; Ortholog(s) have inorganic phosphate transmembrane transporter activity, manganese ion transmembrane transporter activity and role in manganese ion transport, phosphate ion transport, polyphosphate metabolic process
CAGL0J06028g	3.21476	62.7904	5.58935e-06	2.89773	40.8925	8.5981e-08	MEP2	Uncharacterized ORF; Ortholog(s) have high affinity secondary active ammonium transmembrane transporter activity, methylammonium transmembrane transporter activity
CAGL0L05434g	3.11284	3707.45	1.32357e-12	3.73557	4239.55	1.21899e-32	NCA3	Uncharacterized ORF; Ortholog(s) have beta-glucosidase activity, role in fungal-type cell wall biogenesis, mitochondrion organization and fungal-type cell wall localization
CAGL0J11935g	2.97225	143.673	1.52476e-11	2.25862	139.391	1.28715e-10	AWP3b	De novo genome assembly
CAGL0A04081g	2.96594	12725	3.80938e-18	3.56791	14214.6	1.21899e-32	NCW2	Uncharacterized ORF; Predicted GPI-linked cell wall protein
CAGL0L06776g	2.90214	1546.05	4.96952e-12	3.36503	1414.14	9.63515e-37	N/A	Uncharacterized ORF; Has domain(s) with predicted sequence-specific DNA binding, sequence-specific DNA binding transcription factor activity, zinc ion binding activity and role in regulation of transcription, DNA-dependent
CAGL0M07766g	2.83148	710.416	4.03884e-07	2.61657	636.975	1.42725e-23	N/A	Uncharacterized ORF; Putative protein; gene is upregulated in azole-resistant strain
CAGL0E02409g	2.79327	1364.18	5.01279e-15	3.42013	1270.24	1.1339e-35	CSI2	Uncharacterized ORF; Ortholog(s) have cellular bud neck, fungal-type vacuole localization
CAGL0E02233g	2.67936	829.736	1.39054e-27	2.58414	741.312	1.67778e-28	PCL1	Uncharacterized ORF; Ortholog(s) have cyclin-dependent protein kinase regulator activity
CAGL0K00715g	2.56702	8517.86	1.5497e-31	2.45476	11024.3	2.61448e-24	RTA1	Uncharacterized ORF; Putative protein involved in 7-aminocholesterol resistance; gene is upregulated in azole-resistant strain
CAGL0C04741g	2.5129	955.143	9.68045e-09	2.70755	920.903	1.3296e-12	SOD1	Verified ORF; Cytosolic copper-zinc superoxide dismutase
CAGL0G09449g	2.50144	15013.3	3.90711e-26	2.84639	14495.2	6.51097e-40	CRH1	Verified ORF; Putative glycoside hydrolase; predicted GPI-anchor
CAGL0B00715g	2.4481	443.973	5.36924e-21	2.25909	453.844	2.26164e-19	N/A	Unknown
CAGL0E02145g	2.43814	598.202	1.19107e-14	2.86753	615.481	1.21246e-22	SKM1	Uncharacterized ORF; Ortholog(s) have protein kinase activity, role in cytokinetic cell separation, negative regulation of gene expression, protein phosphorylation, sterol import and nucleus, plasma membrane localization
CAGL0K04433g	2.34109	4233.79	2.88749e-11	2.52662	3801.9	3.24336e-27	PEF1	Uncharacterized ORF; Ortholog(s) have calcium ion binding, zinc ion binding activity, role in axial cellular bud site selection, bipolar cellular bud site selection and cellular bud neck, cytoplasm, nucleus localization
CAGL0I06644g	2.31553	404.48	0.000356058	3.37763	283.712	2.15137e-18	SPI1	Uncharacterized ORF; Putative GPI-linked cell wall protein
CAGL0M12320g	2.2992	4850.49	6.06829e-18	2.63486	4926.75	7.66307e-26	FLC2	Uncharacterized ORF; Ortholog(s) have FAD transmembrane transporter activity, role in FAD transport, fungal-type cell wall biogenesis, protein folding, transmembrane transport and endoplasmic reticulum localization
CAGL0D01265g	2.29783	195.458	7.40744e-05	2.32064	221.887	2.80117e-10	MT-I	Verified ORF; Copper-binding metallothionein, involved in sequestration of metal ions; inducible by copper and silver; gene used for molecular typing of <i>C. glabrata</i> strain isolates
CAGL0H05621g	2.2283	2215.33	1.30229e-14	2.58155	2385.21	8.10858e-24	RLM1	Uncharacterized ORF; Putative transcription factor with a predicted role in cell wall integrity
CAGL0K11946g	2.22279	3763.58	2.54187e-05	2.19563	3221.24	7.44017e-16	N/A	Uncharacterized ORF
CAGL0H00440g	2.21661	2060.57	8.80211e-17	2.04703	2171.69	2.13898e-26	YJR124C	Uncharacterized ORF; Has domain(s) with predicted role in transmembrane transport and integral to membrane localization
CAGL0D06050g	2.20645	1526.75	5.30122e-21	2.45114	1621.43	5.61606e-31	KCH1	Uncharacterized ORF; Ortholog(s) have fungal-type vacuole localization
CAGL0A03410g	2.20575	89.8295	7.46407e-09	1.84554	114.458	1.61905e-11	N/A	Uncharacterized ORF
CAGL0L02827g	2.18921	1679.08	1.66748e-09	2.59954	1745.79	1.04758e-19	PTP2	Uncharacterized ORF; Ortholog(s) have protein tyrosine phosphatase activity
CAGL0M05049g	2.15471	4920.84	6.00415e-17	1.90191	4775.87	1.21114e-12	DFG5	Uncharacterized ORF; Putative glycoside hydrolase; predicted GPI-anchor
CAGL0C04763g	2.14963	2112.96	7.88389e-10	2.05457	1903.57	5.54444e-19	N/A	Uncharacterized ORF; Has domain(s) with predicted integral to membrane localization
CAGL0J07700g	2.14677	431.991	1.64041e-21	2.04011	516.962	1.59706e-15	CWC25	Uncharacterized ORF; Ortholog(s) have role in nuclear mRNA splicing, via spliceosome and U2-type spliceosomal complex localization
CAGL0K04411g	2.09591	385.9	5.09855e-09	2.15513	438.023	5.50636e-16	LST7	Uncharacterized ORF; Ortholog(s) have protein transporter activity, role in Golgi to plasma membrane transport, intracellular protein transport and cytosol, nucleus, vesicle coat localization
CAGL0B00946g	2.09387	4974.73	1.92433e-09	2.55787	5019.9	1.00502e-24	RNQ1	Uncharacterized ORF; Ortholog(s) have cytosol localization
CAGL0A03905g	2.08833	290.529	4.54093e-10	2.36317	302.534	2.4295e-12	HMX1	Uncharacterized ORF; Ortholog(s) have heme oxygenase (decyclizing) activity and role in cellular iron ion homeostasis, heme catabolic process, response to carbon monoxide, response to oxidative stress
CAGL0J03256g	2.08153	2420.66	2.88526e-21	1.90666	2330.52	5.91836e-20	PTP3	Uncharacterized ORF; Ortholog(s) have protein tyrosine phosphatase activity
CAGL0K08558g	2.05364	11065.1	2.55521e-09	1.82697	10387.5	3.3741e-08	GFA1	Uncharacterized ORF; Ortholog(s) have glutamine-fructose-6-phosphate transaminase (isomerizing) activity
CAGL0K12892g	2.05221	4860.76	1.6901e-11	2.03791	5096.8	1.34732e-21	RGD2	Uncharacterized ORF; Ortholog(s) have Rho GTPase activator activity, role in establishment or maintenance of actin cytoskeleton polarity, small GTPase mediated signal transduction and cell cortex of cell tip, cellular bud neck, medial cortex localization
CAGL0D05434g	2.0457	1043.45	8.62137e-14	2.00932	1036.26	1.09021e-12	ROX1	Uncharacterized ORF; Has domain(s) with predicted DNA binding activity
CAGL0L13156g	2.01723	198.111	5.72566e-05	1.11751	309.002	0.00176498	RFU1	Uncharacterized ORF; Ortholog(s) have enzyme inhibitor activity, role in regulation of ubiquitin homeostasis and endosome localization
CAGL0L00561g	2.00203	283.136	0.00019784	1.98369	200.382	1.13704e-09	SSO1	Uncharacterized ORF; Ortholog(s) have SNAP receptor activity, phosphatidic acid binding, phosphatidylinositol-3,4-bisphosphate binding, phosphatidylinositol-3,5-bisphosphate binding, phosphatidylinositol-4,5-bisphosphate binding activity
CAGL0H04851g	1.96966	2599.53	2.93924e-07	2.04831	2350.12	1.5715e-12	PPZ1	Uncharacterized ORF; Ortholog(s) have 4-nitrophenylphosphatase activity, protein serine/threonine phosphatase activity and role in cellular protein localization, cellular sodium ion homeostasis, protein dephosphorylation
CAGL0M07381g	1.93715	7779.14	2.97096e-13	2.1582	7759.5	1.01375e-25	KTR6	Uncharacterized ORF; Ortholog(s) have mannosylphosphate transferase activity and role in fungal-type cell wall organization, protein N-linked glycosylation
CAGL0M04191g	1.92229	4124.33	9.66473e-09	2.31782	4406.32	9.76712e-13	YPS1	Verified ORF; Yapsin family aspartic protease; predicted GPI-anchor; complements cell wall defect phenotypes of S. cerevisiae yps1 mutant; regulation of pH homeostasis under acid conditions; induced by high temperature, Slt1- and Crz1p-dependent
CAGL0J11176g	1.89043	1775.16	6.32043e-13	2.11629	1781.26	7.77598e-23	TDA7	Uncharacterized ORF; Putative adhesin-like protein
CAGL0M08030g	1.88785	809.128	9.38037e-12	1.29954	823.086	4.77798e-08	CPR7	Uncharacterized ORF; Ortholog(s) have peptidyl-prolyl cis-trans isomerase activity, unfolded protein binding activity, role in protein refolding, response to stress and cytosol localization
CAGL0K04169g	1.87727	7523.42	1.67474e-07	2.36377	8627.25	8.06456e-21	KSS1	Uncharacterized ORF; Ortholog(s) have MAP kinase activity, transcription factor binding activity
CAGL0H08173g	1.85696	1326.71	3.55069e-09	1.8417	1304.93	1.42552e-14	CIN5	Putative bZIP transcription factor of the yAP-1 family; null mutant shows decreased resistance to fluconazole and increased growth on glycerol, consistent with a possible role in repressing mitochondrial function in glucose-poor conditions
CAGL0G00858g	1.85073	1071.73	1.12103e-10	2.24831	1186.72	5.50636e-16	MID2	Uncharacterized ORF; Ortholog(s) have transmembrane signaling receptor activity
CAGL0I05654g	1.84877	1091.99	1.61969e-06	1.71762	1219.22	5.0531e-12	URK1	Uncharacterized ORF; Ortholog(s) have uridine kinase activity, role in pyrimidine-containing compound salvage and cell division site, cytosol, nucleus, spindle pole body localization
CAGL0J00539g	1.84577	9366.56	1.03979e-14	2.11472	10448.4	3.78507e-21	SLT2	Verified ORF; Mitogen-activated protein kinase with a role in cell wall integrity
CAGL0M06787g	1.84233	3144.44	9.229e-08	1.39967	2952.28	2.85105e-05	KTR5	Uncharacterized ORF; Ortholog(s) have role in fungal-type cell wall organization and cytosol, nucleus localization
CAGL0B00924g	1.83238	417.847	1.12103e-10	2.0443	433.914	3.60525e-14	BIK1	Uncharacterized ORF; Ortholog(s) have microtubule binding, protein homodimerization activity
CAGL0D01628g	1.82202	828.308	6.20358e-11	2.0889	813.146	4.61299e-22	BRR1	Uncharacterized ORF; Ortholog(s) have RNA binding activity, role in spliceosomal complex assembly and small nuclear ribonucleoprotein complex localization
CAGL0E03069g	1.82127	2119.76	0.00017311	1.33255	2346.83	2.201e-06	ENP2	Uncharacterized ORF; Ortholog(s) have role in cellular response to drug, rRNA processing, ribosomal small subunit biogenesis and 90S preribosome, cytosol, nucleolus localization
[truncated: 639 more rows]

## Sheet: Data 2f
Data 2f	Enriched gene ontology (GO) terms for biological process (BP), molecular function (MF), and cellular component (CC) of proteins encoded by genes that were upregulated (A) and downregulated (B) in response to micafungin exposure in both the wild-type and ipi1R70H strain
[truncated: 42 more rows]

[truncated: 4 more sheets: Data 2g, Data 2h, Data 2i, Data 2j]
